# Supplementary material for: Ratio of asymptomatic COVID-19 cases among ascertained SARS-CoV-2 infections in different regions and population groups in 2020: a systematic review and meta-analysis including 130 123 infections from 241 studies
Source: PubMed Central journal article supplement — BMJ Open. 2021 Dec 6;11(12):e049752. doi: 10.1136/bmjopen-2021-049752 (PMC8655350; doi:10.1136/bmjopen-2021-049752), 2021-12-06
Supplement: bmjopen-2021-049752.draft_revisions.pdf [file bmjopen-2021-049752.draft_revisions.pdf]

# BMJ Open

BMJ Open is committed to open peer review. As part of this commitment we make the peer review history of every article we publish publicly available.

When an article is published we post the peer reviewers' comments and the authors' responses online. We also post the versions of the paper that were used during peer review. These are the versions that the peer review comments apply to.

The versions of the paper that follow are the versions that were submitted during the peer review process. They are not the versions of record or the final published versions. They should not be cited or distributed as the published version of this manuscript.

BMJ Open is an open access journal and the full, final, typeset and author-corrected version of record of the manuscript is available on our site with no access controls, subscription charges or pay-per-view fees (<http://bmjopen.bmj.com>).

If you have any questions on BMJ Open's open peer review process please email [info.bmjopen@bmj.com](mailto:info.bmjopen@bmj.com)

# BMJ Open

## The rate of asymptomatic COVID-19 among ascertained infections: A systematic review and meta-analysis including 12,713 infections from 136 studies

|                               |                                                                                                                                                                                                                                                                                                                                                                                                                                                                                                                                             |
|-------------------------------|---------------------------------------------------------------------------------------------------------------------------------------------------------------------------------------------------------------------------------------------------------------------------------------------------------------------------------------------------------------------------------------------------------------------------------------------------------------------------------------------------------------------------------------------|
| Journal:                      | <i>BMJ Open</i>                                                                                                                                                                                                                                                                                                                                                                                                                                                                                                                             |
| Manuscript ID                 | bmjopen-2021-049752                                                                                                                                                                                                                                                                                                                                                                                                                                                                                                                         |
| Article Type:                 | Original research                                                                                                                                                                                                                                                                                                                                                                                                                                                                                                                           |
| Date Submitted by the Author: | 08-Feb-2021                                                                                                                                                                                                                                                                                                                                                                                                                                                                                                                                 |
| Complete List of Authors:     | Chen, Xiao; Zhejiang University<br>Huang, Ziyue; Mianyang Maternal and Child Health Care Hospital<br>Wang, Jingxuan; The Chinese University of Hong Kong<br>Zhao, Shi; The Chinese University of Hong Kong; The Chinese University of Hong Kong<br>Wong, Martin Chi-Sang; The Chinese University of Hong Kong<br>Chong, Ka; The Chinese University of Hong Kong; The Chinese University of Hong Kong<br>He, Daihai; Hong Kong Polytechnic University, Department of Applied Mathematics<br>Li, Jinhui; The Chinese University of Hong Kong, |
| Keywords:                     | COVID-19, INFECTIOUS DISEASES, EPIDEMIOLOGY, PUBLIC HEALTH                                                                                                                                                                                                                                                                                                                                                                                                                                                                                  |
|                               |                                                                                                                                                                                                                                                                                                                                                                                                                                                                                                                                             |

SCHOLARONE™  
Manuscripts

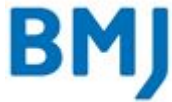

I, the Submitting Author has the right to grant and does grant on behalf of all authors of the Work (as defined in the below author licence), an exclusive licence and/or a non-exclusive licence for contributions from authors who are: i) UK Crown employees; ii) where BMJ has agreed a CC-BY licence shall apply, and/or iii) in accordance with the terms applicable for US Federal Government officers or employees acting as part of their official duties; on a worldwide, perpetual, irrevocable, royalty-free basis to BMJ Publishing Group Ltd ("BMJ") its licensees and where the relevant Journal is co-owned by BMJ to the co-owners of the Journal, to publish the Work in this journal and any other BMJ products and to exploit all rights, as set out in our [licence](#).

The Submitting Author accepts and understands that any supply made under these terms is made by BMJ to the Submitting Author unless you are acting as an employee on behalf of your employer or a postgraduate student of an affiliated institution which is paying any applicable article publishing charge ("APC") for Open Access articles. Where the Submitting Author wishes to make the Work available on an Open Access basis (and intends to pay the relevant APC), the terms of reuse of such Open Access shall be governed by a Creative Commons licence – details of these licences and which [Creative Commons](#) licence will apply to this Work are set out in our licence referred to above.

Other than as permitted in any relevant BMJ Author's Self Archiving Policies, I confirm this Work has not been accepted for publication elsewhere, is not being considered for publication elsewhere and does not duplicate material already published. I confirm all authors consent to publication of this Work and authorise the granting of this licence.

1  
2  
3  
4  
5  
6  
7  
8  
9  
10  
11  
12  
13  
14  
15  
16  
17  
18  
19  
20  
21  
22  
23  
24  
25  
26  
27  
28  
29  
30  
31  
32  
33  
34  
35  
36  
37  
38  
39  
40  
41  
42  
43  
44  
45  
46  
47  
48  
49  
50  
51  
52  
53  
54  
55  
56  
57  
58  
59  
60

1 **The rate of asymptomatic COVID-19 among ascertained infections: A**  
2 **systematic review and meta-analysis including 12,713 infections from 136**  
3 **studies**

4  
5 Xiao Chen<sup>a#</sup>, Ziyue Huang<sup>b#</sup>, Jingxuan Wang<sup>c\*\*</sup>, Shi Zhao<sup>c,d</sup>, Martin Chi Sang Wong<sup>c</sup>, Marc  
6 Ka Chun Chong<sup>c,d,e</sup>, Daihai He<sup>f</sup>, and Jinhui Li<sup>c\*</sup>

7  
8  
9 **Affiliations:**

10 <sup>a</sup> School of Public Health, Zhejiang University, Zhejiang, China

11 <sup>b</sup> Mianyang Maternal and Child Health Care Hospital, Sichuan, China

12 <sup>c</sup> JC School of Public Health and Primary Care, The Chinese University of Hong Kong, Hong  
13 Kong SAR, China

14 <sup>d</sup> Shenzhen Research Institute, The Chinese University of Hong Kong, Shenzhen, China

15 <sup>e</sup> Centre for Health System and Policy Research, Faculty of Medicine, CUHK

16 <sup>f</sup> Department of Applied Mathematics, Hong Kong Polytechnic University, Hong Kong SAR,  
17 China

18  
19 Authors' contact:

20 Xiao Chen: chenxiao9410@zju.edu.cn

21 Ziyue Huang: hzy950822@163.com

22 Jingxuan Wang: jxwang@link.cuhk.edu.hk

1  
2  
3  
4  
5 23 Shi Zhao: zhaoshi.cmsa@gmail.com  
6

7 24 Martin Chi Sang Wong: wong\_martin@cuhk.edu.hk  
8

9 25 Marc Ka Chun Chong: marc@cuhk.edu.hk  
10

11 26 Daihai He: daihai.he@polyu.edu.hk  
12

13  
14 27 Jinhui Li: jinhui@cuhk.edu.hk  
15

16 28 # They contributed equally to this work.  
17  
18

19 29  
20

21 30 \* correspondence to: Jinhui Li, JC School of Public Health and Primary Care, The Chinese  
22 University of Hong Kong, Hong Kong SAR, China, Email: [jinhui@cuhk.edu.hk](mailto:jinhui@cuhk.edu.hk); or Jingxuan  
23 31 Wang, JC School of Public Health and Primary Care, The Chinese University of Hong Kong,  
24 32 Hong Kong SAR, China, Email: [jxwang@link.cuhk.edu.hk](mailto:jxwang@link.cuhk.edu.hk).  
25  
26  
27

28  
29 34  
30  
31  
32  
33  
34  
35  
36  
37  
38  
39  
40  
41  
42  
43  
44  
45  
46  
47  
48  
49  
50  
51  
52  
53  
54  
55  
56  
57  
58  
59  
60

## 35 **Abstract**

36 *Introduction:* Asymptomatic infection of SARS-CoV-2 may lead to silent community  
37 transmission and compromise pandemic control measures of COVID-19. We aimed to estimate  
38 the rate of asymptomatic COVID-19 infection from published studies, and compare this rate  
39 among different patient groups.

40  
41 *Methods:* The electronic databases including Medline, Embase, PubMed, and three Chinese  
42 electronic databases (The Chinese National Knowledge Infrastructure (CNKI), WanFang Data,  
43 and VIP) were searched. Studies with sample size (or number of subjects) not less than 5 were  
44 included. The STATA command ‘*Metaprop*’ was implemented to conduct meta-analysis for  
45 the pooled rate estimates of asymptomatic infections with exact binomial and score test-based  
46 95% confidence intervals (CIs).

47  
48 *Results:* A total of 12,713 ascertained COVID-19 infections in 136 studies were included in  
49 the meta-analysis, including 2,785 asymptomatic infections. The overall rate of asymptomatic  
50 infection was 15.1% (12.0%-18.4%). Subgroup analysis showed that the rate was significantly  
51 higher in pregnant women (36.3%, 15.7%-59.6%), children (29.4%, 17.4%-42.9%), and  
52 studies for screening settings (25.3%, 15.4%-36.5%) conducted on or after 01 March 2020  
53 (27.8%, 15.7%-41.7%). In terms of geographical regions, the rate was the highest in Asia  
54 (excluding China) (27.4%, 14.3%-42.6%), followed by Europe (22.7%, 6.3%-44.9%), the US  
55 (15.9%, 8.9%-24.3%), and China (13.1%, 10.2%-16.3%).

56  
57 *Conclusion:* High proportion of asymptomatic infection were observed in pregnant women,  
58 children, European residents, screening programmes, and in studies conducted in and after  
59 March 2020. Our findings help inform the true burden of COVID-19 among different groups  
60 of cases, and provide information on cost-effective strategies of identifying and tracing  
61 asymptomatic infections.

62  
63 (247 words)

1  
2  
3  
4  
5  
6  
7  
8  
9  
10  
11  
12  
13  
14  
15  
16  
17  
18  
19  
20  
21  
22  
23  
24  
25  
26  
27  
28  
29  
30  
31  
32  
33  
34  
35  
36  
37  
38  
39  
40  
41  
42  
43  
44  
45  
46  
47  
48  
49  
50  
51  
52  
53  
54  
55  
56  
57  
58  
59  
60

64

65 **Keywords:** COVID-19; SARS-CoV-2; asymptomatic infection; asymptomatic ratio; meta-  
66 analysis.

67

For peer review only

1  
2  
3  
4  
5  
6 68 **Article Summary**  
7  
8

9 69 **Strengths and limitations of this study**  
10

- 11  
12 70 1. Reviewed a large number of studies, and conducted subgroup analysis from several angles.  
13  
14  
15 71 2. The pooled asymptomatic infection rate had a high level of heterogeneity.  
16  
17  
18 72 3. Majority of the selected studies are from China and the US.  
19  
20  
21 73 4. Pre-symptomatic infection might be wrongly classified as ‘asymptomatic’ when reported.  
22  
23  
24 74 5. The study findings bear significance on public health policies that aim to achieve early  
25  
26 75 identification and more stringent containment of the pandemic.  
27

28 76  
29  
30  
31  
32  
33  
34  
35  
36  
37  
38  
39  
40  
41  
42  
43  
44  
45  
46  
47  
48  
49  
50  
51  
52  
53  
54  
55  
56  
57  
58  
59  
60



## 77 Introduction

78 In 2019, a cluster of severe pneumonia cases of unknown type were reported in Wuhan, China  
79 (1). Later coined as the coronavirus disease 2019 (COVID-19), it rapidly resulted in large-scale  
80 outbreaks across many regions. On 30 January 2020, the World Health Organization  
81 (WHO) declared the COVID-19 as a public health emergency of international concern (2), and  
82 further defined it as a pandemic on 11 March 2020. As of 2 September 2020, a cumulative total  
83 of 25,937,361 COVID-19 cases have been confirmed globally, with 861,910 associated deaths.

84  
85 The pathogen of COVID-19, i.e., severe acute respiratory syndrome coronavirus 2 (SARS-  
86 CoV-2), is highly contagious, and could be transmitted from human to human (1, 3). The viral  
87 load in an asymptomatic patient has been found to be similar to that in symptomatic patients in  
88 a study of nine patients (4), and this observation was later confirmed in a study involving large  
89 samples (5). The early peaking of SARS-CoV-2 viral load during the pre-symptomatic phase  
90 may cause silent community outbreaks (6). Further investigations also found that the  
91 asymptomatic infections may carry SARS-CoV-2 for more than 1 month, indicating the long  
92 lasting risk of secondary infection (7-11). Several similar definitions of 'asymptomatic case'  
93 were noted in previous studies (12). We followed the official definition from the State Council  
94 of China and the World Health Organization (WHO) (13, 14), and defined 'asymptomatic  
95 case' as individuals who 1) have no clinical manifestations of COVID-19, such as fever, cough,  
96 sore throat, and other self-perceived or clinically identifiable symptoms and signs; 2) have  
97 positive result of SARS-CoV-2 pathogen test; and 3) does not develop symptoms until the end  
98 of hospital admission or follow-up observations. Asymptomatic COVID-19 infection rate,  
99 or asymptomatic ratio, is calculated as the proportion of asymptomatic cases among all  
100 COVID-19 infections.

1  
2  
3  
4  
5 102 Determining the rate of asymptomatic infection is important as it may deepen the understanding  
6  
7 103 of the real reproductive number ( $R_0$ ), as well as the true incidence and mortality rate of COVID-  
8  
9 104 19. The rate may also function as an essential epidemiological parameter to inform disease  
10  
11 105 combating policies, including the density and range of screening, patient isolation as well as  
12  
13 106 early intervention (15). Nevertheless, the significance of the invisibly infected person as the  
14  
15 107 source of infection depends on its distribution in the population, and the amount and duration  
16  
17 108 of the virus excreted (16). The reported proportions of asymptomatic individuals in existing  
18  
19 109 literature varied a lot (15), depending on their research settings (e.g. geographical region,  
20  
21 110 screening vs. non-screening studies), demographic characteristics (e.g. age groups, pregnant  
22  
23 111 women, children), and other latent factors. The present study performed a systematic review  
24  
25 112 and meta-analysis to estimate the asymptomatic infection rate based on published studies, and  
26  
27 113 compare the rate among different patient groups as well as study settings.  
28  
29  
30  
31

114

## 115 **Methods**

### 116 *Searching strategy*

117 The Medline, Embase, PubMed, and three Chinese electronic databases (the Chinese National  
118 Knowledge Infrastructure [CNKI], WanFang Data, and VIP) were searched from 1 November  
119 2019 to 10 July 2020 for studies reporting the rate of asymptomatic COVID-19 infection. This  
120 systematic review and meta-analysis was conducted according to the standards strictly  
121 following the '*Preferred Reporting Items for Systematic reviews and Meta-Analyses*'  
122 (PRISMA) guideline (17). The searching details were presented in the **Supplementary Table**  
123 **1**. Meanwhile, highly relevant references were also searched by reviewing the reference list of  
124 the included articles All manuscripts were imported into the Endnote software (version X8,  
125 Thomson Reuters, Carlsbad, California) and duplicate studies were removed.

126

1  
2  
3  
4  
5 127 ***Literature screening and selection criteria***  
6

7  
8 128 Two reviewers (XC and ZH) determined the eligible studies independently. Consensus was  
9  
10 129 reached by referral to a third reviewer (JW) when there was disagreement. All studies were  
11  
12 130 screened by title and abstract first, followed by full texts if the study meets the inclusion criteria,  
13  
14 131 which consist of:

- 15  
16 132 • inclusion criterion #1: the studying subjects were diagnosed with SARS-CoV-2  
17  
18 133 infection;  
19  
20 134 • inclusion criterion #2: the study was designed as an observational study; and  
21  
22 135 • inclusion criterion #3: the numbers of asymptomatic and symptomatic COVID-19  
23  
24 136 infections were explicitly and exactly reported.

25  
26  
27 137 The literature screening was conducted without language or region restriction. The exclusion  
28  
29 138 criteria are as follows. They included

- 30  
31  
32 139 • exclusion criterion #1: study that included patients without virological evidence of  
33  
34 140 SARS-CoV-2 infection;  
35  
36 141 • exclusion criterion #2: study which did not investigate the distribution of asymptomatic  
37  
38 142 COVID-19 infections among all subjects;  
39  
40 143 • exclusion criterion #3: study that is not classified as original research, such as reviews,  
41  
42 144 comments, case report; and  
43  
44 145 • exclusion criterion #4: study has an overall sample size of less than 5.

45  
46 146 For studies that analyzed the same group of subjects more than once, only those with the most  
47  
48 147 updated and detailed information were included for further analysis.

49  
50  
51 148

52  
53  
54 149 ***Data extraction and subgrouping schemes***  
55  
56  
57  
58  
59  
60

1  
2  
3  
4  
5 150 For eligible articles, two types of the information were extracted by the two reviewers (XC and  
6  
7 151 ZH) independently. For each study, we include

- 8  
9  
10 152 • information type #1: the basic information of the individual studies that contains the  
11  
12 153 name of the first author, investigation period, geographical region, and the study setting  
13  
14 154 (screening and non-screening); and  
15  
16 155 • information type #2: the characteristics of subjects including age statistics, sex  
17  
18 156 distribution, sample size, the number of COVID-19 infections, the number of  
19  
20 157 asymptomatic COVID-19 infections, and the number of subsequent clinically  
21  
22 158 detectable symptoms among symptomatic COVID-19 cases.

23  
24 159 To ensure the accuracy of data, cross-checking was conducted after extraction of the  
25  
26 160 preliminary information. Disagreements were resolved through consensus or by referral to the  
27  
28 161 third reviewer (JW).

29  
30  
31 162  
32  
33  
34 163 To explore the source of heterogeneity among the included studies, several subgroup analyses  
35  
36 164 were performed according to the study design and characteristics of subjects in each study.  
37  
38 165 First, we identified three groups based on the subjects' demographical features. They included  
39  
40 166 'children' groups consisting of subjects less than 18 years old; 'pregnant women' groups  
41  
42 167 involving expectant mothers as subjects; and the 'general population' group. Second, three age  
43  
44 168 groups were identified according to the subjects' mean or median age:  $\leq 18$ , from 19 to 45, and  
45  
46 169  $> 45$  years, respectively. The selection of mean or median age followed the statistics reported  
47  
48 170 in each study. Third, studies were categorized into 'screening' or 'non-screening' types,  
49  
50 171 identified by examining whether all subjects in each study were previously diagnosed with  
51  
52 172 COVID-19. Forth, we separated studies based on subjects from different geographical regions  
53  
54 173 including China, Asia (excluding China), the US and Europe. Last, subgroup analysis was  
55  
56 174 performed by study period, during which the subjects were tested for COVID-19, including  
57  
58 175 'before 01 March 2020' or '01 March 2020 and afterwards'.

1  
2  
3  
4  
5 176  
6  
78 177 ***Quality assessment***  
9

10 178 The quality of each included study was assessed by two researchers (XC and ZH)  
11 179 independently using the quality of cross-sectional studies (AXIS) scale (18). There are five  
12 180 components including 20 questions in the AXIS scale. Seven questions measure the quality of  
13 181 reporting; another seven questions measure the quality of study design, and six questions  
14 182 measure the possible introduction of biases in each study.

15  
16  
17  
18  
19  
20  
21 183  
22  
2324 184 ***Statistical analysis***  
25

26 185 Accounting for all included studies, the pooled estimates of the asymptomatic rates were  
27 186 generated with exact binomial-distributed likelihood framework and score test-based 95%  
28 187 confidence intervals (CIs) (1). The STATA command “*metaprop*” was adopted to conduct  
29 188 meta-analysis. Heterogeneity across the studies was examined by the  $I^2$  statistic, measuring the  
30 189 proportion of total variation contributed by between-study variation. The  $I^2$  values < 25%,  
31 190 ranging from 25% to 75%, and > 75% correspond to the thresholds for three ordinal levels of  
32 191 heterogeneity including low, moderate, and high, respectively (19).

33  
34  
35  
36  
37  
38  
39  
40  
41 192  
42  
43

44 193 Univariate and multivariate meta-regression analysis was performed to identify any potential  
45 194 effects of modifiers or confounders on the estimated rate. We examined the effects of the  
46 195 covariates including study population, age-specific proportion, screening/non-screening study,  
47 196 geographical region, and time trend in multivariate analysis. Sensitivity analysis was conducted  
48 197 by omitting one study at a time, generating the pooled estimates and comparing with the  
49 198 original estimates. Potential publication bias was examined by Egger’s test and visualized using

1  
2  
3  
4  
5 199 a funnel plot. If the tests indicated potential publication bias, the Trim and Fill's method, which  
6  
7 200 is based on a modified funnel plot, would be adopted to adjust the small-study effect (20).  
8  
9

10 201

11  
12 202 All analyses were performed using STATA statistical software (version 14.0, Stata, College  
13  
14 203 Station, Texas, USA). The figures were generated using R software (version 3.6.3) with the  
15  
16 204 'forestplot' package.  
17  
18

19 205

## 22 206 **Results**

### 25 207 *Characteristics of studies and subjects*

26  
27  
28 208 4,243 citations were identified by the literature search, of which 362 were from MEDLINE,  
29  
30 209 573 were from PubMed, 955 were from Embase, 1,106 were from CNKI (Chinese), 1,010 were  
31  
32 210 from WanFang (Chinese), and 237 were from VIP (Chinese) (**Figure 1**). There were 3,268  
33  
34 211 citations after removal of duplicates. We retrieved 382 full-text articles assessed for eligibility  
35  
36 212 after 686 citations were excluded during title or abstract screening with pre-determined criteria.  
37  
38 213 We excluded 245 articles that fulfilled our exclusion criteria, or that consisted of duplicate data  
39  
40 214 source. Finally, there were 136 articles included in the meta-analysis.  
41  
42

43 215

44  
45 216 The basic characteristics of the included studies are shown in **Supplementary Table 2**  
46  
47 217 including cities, countries and study periods in which the ascertained COVID-19 infections  
48  
49 218 were recruited; the number of test-positive and asymptomatic infections; the number of  
50  
51 219 presymptomatic infection in patients if available; and the travel history and demographics of  
52  
53 220 each patient. Approximately 80.1% (109 out of 136) of all included studies were conducted in  
54  
55 221 China, 4.4% in the US, 2.9% in Japan, and 2.2% in Korea. Among 136 studies, 89.0% were  
56  
57  
58  
59  
60

222 performed among the general population, 7.4% in children and 3.7% in pregnant women,  
223 respectively.

224

225 Quality scores of AXIS for the included studies ranged between 11 and 19 points, with 69  
226 studies meeting the criteria of having high quality ( $\geq 16$  points). Overall, 97.1% (132 out of  
227 136) of all studies met the criteria for both reporting and quality design, and the risk factors  
228 and outcome variables were appropriate for the studies. In all studies, the methods were clearly  
229 defined so that those studies could be repeated, and the presentation of results met the analysis  
230 descriptions in the methods with internal consistency (**Supplementary Table 3**).

231

### 232 *Asymptomatic ratio estimates*

233 A total of 12,713 ascertained COVID-19 infections from 136 studies were finally included in  
234 the meta-analysis (**Figure 2**), including 2,889 asymptomatic infections at the time of diagnosis.  
235 The overall rate of asymptomatic infections was estimated at 16.8% (13.7%-20.1%). The  $I^2$   
236 equaled to 96.0%, indicating a high heterogeneity among the studies. Of the 2,889  
237 asymptomatic infections, 104 (3.6%) developed symptoms after admission. After excluding  
238 these pre-symptomatic observations, the pooled rate was 15.1% (12.0%-18.4%) at a  $I^2$  of 96.2%.

239

240 In subgroup analysis, we found that pregnant women (36.3%, 15.7%-59.7%;  $I^2 = 79.6\%$ ) had  
241 a significantly higher asymptomatic infection rate than children (29.4%, 17.4%-42.9%;  $I^2 =$   
242 87.2%), whereas the general population had the lowest asymptomatic rate (13.5%, 10.4%-  
243 16.7%;  $I^2 = 96.4\%$ ). Regarding age-specific proportion, patients aged  $\leq 18$  years (22.9%,  
244 14.6%-32.1%;  $I^2 = 66.2\%$ ) had a significantly higher prevalence of asymptomatic cases than

1  
2  
3  
4  
5 245 adults aged 19-45 years (16.5%, 10.8%-22.9%;  $I^2 = 94.0%$ ) or > 45 years (9.3%, 5.8%-13.4%;  
6  
7 246  $I^2 = 93.5%$ ).

8  
9  
10 247

11  
12  
13  
14 248 The asymptomatic infection rate was 25.3% (15.4%-36.5%;  $I^2 = 97.3%$ ) among studies for  
15  
16 249 screening settings, which is almost twice of that among studies for non-screening settings  
17  
18 250 (12.9%, 10.3%-15.8%;  $I^2 = 94.0%$ ). Significantly different asymptomatic rates were observed  
19  
20 251 in different geographical regions ( $p$ -value <0.001) - the rate was highest in Asia (excluding  
21  
22 252 China) (27.4%, 14.3%-42.6%;  $I^2 = 92.6%$ ), followed by Europe (22.7%, 6.3%-44.9%;  $I^2 =$   
23  
24 253 98.1%), and the US (15.9%, 8.9%-24.3%;  $I^2 = 94.9%$ ). China was estimated to have the lowest  
25  
26 254 rate of asymptomatic infection (13.1%, 10.2%-16.3%;  $I^2 = 93.7%$ ). For subgroup analysis by  
27  
28 255 time period, we noted that studies conducted before 01 March 2020 reported a pooled  
29  
30 256 asymptomatic infection rate of 11.2% (7.5%-15.3%;  $I^2 = 95.0%$ ), while the rate increased  
31  
32 257 sharply to 27.8% (15.7%-41.7%;  $I^2 = 98.4%$ ) among studies conducted after 01 March 2020.

33  
34 258

35  
36  
37 259 All subgroup analysis results were shown in **Figure 3**.

38  
39  
40 260

41  
42  
43 261 We performed both univariate and multivariate meta-regression analysis to investigate study-  
44  
45 262 level factors that may contribute to the heterogeneity among studies and might have influenced  
46  
47 263 our estimations of the asymptomatic infection rate. The results (**Table 1**) presented that the  
48  
49 264 estimation on rate of asymptomatic infection was not significantly altered by population groups  
50  
51 265 ( $p$ -values range from 0.227 to 0.457) or age groups ( $p$ -values range from 0.478 to 0.992). Being  
52  
53 266 'non-screening' studies where all subjects were diagnosed with COVID-19 would marginally  
54  
55 267 alter the estimation ( $p$ -value = 0.113). Geographical location (studies in Asia excluding China)



1  
2  
3  
4  
5 268 ( $p$ -value = 0.019) and study period (01 March 2020 afterwards;  $p$ -value = 0.005) were  
6  
7 269 significant sources of heterogeneity.  
8  
9

10 270

11  
12 271 We found no evidence of publication bias among studies by Egger's test with  $p$ -value = 0.415.  
13  
14 272 Sensitivity analysis showed that it was unlikely that any individual study significantly  
15  
16 273 influenced the pooled estimates, demonstrating the robustness and reliability of our estimates  
17  
18 274 (Supplementary Table 4).  
19

20  
21 275  
22  
23

## 24 276 **Discussion**

25  
26  
27 277 Our meta-analysis of 12,713 infections in 136 studies performed in 15 countries provides an  
28  
29 278 up-to-date as well as comprehensive overview of asymptomatic infection rate of COVID-19.  
30  
31 279 We also estimated the statistics by different study settings and patients' demographic factors.  
32  
33 280 We found a higher asymptomatic ratio in European countries, in studies on screening settings,  
34  
35 281 and among pregnant women as well as younger populations. The estimated rate in our study  
36  
37 282 (15.1%) is half the size of a previous estimate (33.0%) using binomial distribution (21), yet is  
38  
39 283 consistent with the estimation using Hamiltonian Monte Carlo (HMC) algorithm  
40  
41 284 (22). Regarding real-world evidence, our estimation is consistent with a meta-analysis of 41  
42  
43 285 studies in May 2020, which also noted an asymptomatic infection rate of approximately 15%,  
44  
45 286 with a higher rate among pregnant women and children (23). The findings are very similar with  
46  
47 287 that of the present study. However, our study included 100 more articles, resulting in a more  
48  
49 288 precise estimation with significantly narrower confidence interval. With a larger dataset, we  
50  
51 289 conducted more subgroup analysis which resulted in more implications. First, while China and  
52  
53 290 the US were having a similar asymptomatic infection rates, the rate is two times higher in  
54  
55 291 European countries as well as Asian countries (excluding China). Second, the proportion of  
56  
57 292 asymptomatic carriers was nearly doubled in screening studies than that in non-screening  
58  
59  
60

1  
2  
3  
4  
5 293 studies. Third, asymptomatic infection rate was significantly higher in studies conducted in or  
6  
7 294 after 01 March 2020 than those conducted beforehand.  
8  
9

10 295

11  
12 296 In the subgroup analysis, we noted a large variety of asymptomatic rates among different  
13  
14 297 populations. For instance, younger people tended to have a significantly higher rate. These  
15  
16 298 findings are consistent with that from previous publications (24). Infection control measures  
17  
18 299 may be targeted on the early detection and isolation of asymptomatic youth, as the young  
19  
20 300 asymptomatic carriers are of higher probability to bring in community transmission due to their  
21  
22 301 more socially active lifestyle habits with more frequent travelling than people in other age  
23  
24 302 groups (25).  
25  
26

27 303

28  
29  
30 304 We also noted that the asymptomatic infection rate for pregnant women (36.3%) is almost three  
31  
32 305 times that for the general population (13.5%). Previous publication on pregnant women and  
33  
34 306 COVID-19 is very limited. Case reports from the New York hospital reported a similarly high  
35  
36 307 rate (14 women, 32.6%) at presentation, yet 71.4% (10 women) of the asymptomatic mothers  
37  
38 308 developed symptoms during their hospitalization and postpartum course (26). Therefore, the  
39  
40 309 high proportion of asymptomatic infections estimated by our study may include both pre-  
41  
42 310 symptomatic and asymptomatic cases, due to a high proportion of pregnant women undergoing  
43  
44 311 COVID-19 screening at inpatient admission. More follow-up studies among the pregnant  
45  
46 312 women are needed before drawing further conclusions. Nevertheless, undetected asymptomatic  
47  
48 313 pregnant women may lead to more severe consequences. Without early detection and proper  
49  
50 314 preventive measures, the delivery of asymptomatic patients brings extra risks to nosocomial  
51  
52 315 infection, and may also result in droplet transmission among the women, kids, as well as other  
53  
54 316 family members (26). Importantly, the data suggest that the severity and mortality risk of  
55  
56 317 hospital transmission may be greater than that of community-acquired COVID-19 (27).  
57  
58  
59  
60

318

319 We compared the asymptomatic infection rate in China, in Asia (excluding China), in the US,  
320 and in Europe. Previous meta-analysis indicated no significant difference in the proportion of  
321 asymptomatic infection between studies conducted in China or other countries (28). On the  
322 contrary, our results showed that the rates in Europe (22.7%) and Asia (excluding China)  
323 (27.4%) were almost twice than that in China (13.1%) and the US (15.9%). For China, the rate  
324 is consistent with a previous meta-analysis (15.6%) (29), as well as the latest government  
325 release on Wuhan population nucleic acid testing (14.7%) (30). The changing rate of  
326 asymptomatic infection in Hong Kong also confirmed our findings - in the first phase of the  
327 pandemic, the infected cases were dominated by imported ones from mainland China, and the  
328 asymptomatic infection rate was around 16% (23); whereas in the second and third waves, the  
329 infections were mainly imported from Europe and South-East Asian countries, giving a  
330 significantly higher rate (23%) (31). However, the smaller sample size for Europe and Asia  
331 (excluding China) led to wider confidence intervals for the two regions.

332

333 We noted that the asymptomatic infection rate was nearly doubled in screening studies than  
334 that in non-screening studies. If we consider the rate as a constant, the higher asymptomatic  
335 infection rate estimates were likely due to higher probabilities of ascertaining asymptomatic  
336 COVID-19 infections in the community with screening implemented. This implies the  
337 importance of mass screening in detecting the infections, which is of importance in community  
338 infection control. Increasing the accessibility and affordability of community testing could be  
339 an important surveillance strategy for early containment of diagnosed cases (32).

340

341 We also found that the pooled asymptomatic infection rate increased from 11.2% (95% CI:  
342 7.5%-15.3%) for studies conducted before 01 March 2020, to 27.8% (15.7%-41.7%) for studies

1  
2  
3  
4  
5 343 conducted in 01 March 2020 or afterwards, although the 95% CI is larger in the latter time  
6  
7 344 period. This timeline is highly consistent with a previous study using the publicly released from  
8  
9 345 the Centre for Health Protection in Hong Kong (33). The increased rate may be due to  
10  
11 346 overlooking of asymptomatic, especially pre-symptomatic cases at the early stage of the  
12  
13 347 pandemic, when medical resources were targeted to patients with severe symptoms. Later, with  
14  
15 348 increased public awareness and test accessibility, more COVID-19 infected individuals without  
16  
17 349 symptoms were detected, while more and more studies reported the proportion of  
18  
19 350 asymptomatic patients. In this context, future studies may explore whether the proportion of  
20  
21 351 COVID-19 infections with mild or no symptoms is increasing, especially when considering the  
22  
23 352 SARS-CoV-2 variant with D replaced by G at the 614-th codon in the Spike protein which  
24  
25 353 dominated the pandemic since late February 2020 (34-37).

26  
27 354

28  
29  
30 355 This study has limitations. First, our pooled asymptomatic infection rates were found to have  
31  
32 356 a high level of heterogeneity ( $I^2 = 96.2\%$ ). This could be attributed to the difficulties in  
33  
34 357 generating the exact number of infections and asymptomatic cases during an outbreak.  
35  
36 358 Different studies reported at different time periods, regions and populations may result in  
37  
38 359 diverse prevalence (38). We conducted subgroup analysis and meta-regression to figure out the  
39  
40 360 source of heterogeneity. This high level may be due to some unobserved factors which have  
41  
42 361 not be included in the original studies, such as changing pandemic control measures in some  
43  
44 362 countries; the diverse definition of asymptomatic infection, varying practices of surveillance  
45  
46 363 and ascertainment of asymptomatic infection; as well as meteorological disparities across time  
47  
48 364 and regions. Nevertheless, previous studies indicated that any amount of heterogeneity is  
49  
50 365 acceptable if both accurate data and predefined eligibility criteria were provided (39,  
51  
52 366 40). Second, although we applied a comprehensive searching strategy for the literature, 80%  
53  
54 367 of the selected articles and (50,973/55,951 = 91.1%) of the sampled individuals in our analysis  
55  
56 368 are from China (35,003 individuals) and the US (15,970 individuals). Subgroup analysis was

1  
2  
3  
4  
5 369 conducted to compare the ratio in different geographical regions, yet there are very few studies  
6  
7 370 performed in Australia and Africa by the end of July 2020. Third, a symptomatic COVID-19  
8  
9 371 case might be mis-classified as 'asymptomatic' during the incubation period. Although we  
10  
11 372 excluded 104 (3.6%) subjects who developed symptoms in the follow-up period, most studies  
12  
13 373 are cross-sectional without follow-up data, while other individuals may not have completed  
14  
15 374 observations for the whole incubation period. This may result in a certain degree of  
16  
17 375 overestimation on the asymptomatic infection rate, yet we consider the impact from this  
18  
19 376 phenomenon as minor owing to our relatively long study period. With additional information  
20  
21 377 of the exposure and reporting dates of each case, we remark our estimation can be extended to  
22  
23 378 a right censoring version to further address some potential bias in the existing frameworks (15).

24  
25 379

## 28 380 **Conclusions**

31 381 We estimated the asymptomatic infection rate of 15.1% among COVID-19 infections. We  
32  
33 382 reported that pregnant women, children, European residents, screening programmes, and  
34  
35 383 studies conducted after 01 March 2020 had higher asymptomatic infection rates. Our findings  
36  
37 384 provide further insights on the distribution of asymptomatic COVID-19 infections in different  
38  
39 385 groups of individuals, which bear significance on public health policies that aim to achieve  
40  
41 386 early identification and more stringent containment of the pandemic.

42  
43  
44 387

## 46 388 **Declarations**

## 49 389 **Patient and Public Involvement**

51  
52 390 Not applicable.

## 55 391 **Ethics approval and consent to participate**

1  
2  
3  
4  
5 392 Not applicable.  
6  
7

8 393 *Availability of materials*  
9

10 394 Not applicable.  
11  
12

13 395 *Consent for publication*  
14

15  
16 396 Not applicable.  
17  
18

19 397 *Funding*  
20

21  
22 398 This study was funded by The Key Project of Medicine Discipline of Guangzhou (2017–2019-  
23 399 07). DH was supported by General Research Fund (15205119) of Research Grants Council of  
24 400 Hong Kong and Alibaba (China) Co. Ltd. Collaborative Research grant.  
25  
26  
27

28 401 *Acknowledgements*  
29

30  
31 402 None.  
32  
33

34 403 *Disclaimer*  
35

36  
37 404 The funding agencies had no role in the design and conduct of the study; collection,  
38 405 management, analysis, and interpretation of the data; preparation, review, or approval of the  
39 406 manuscript; or decision to submit the manuscript for publication.  
40  
41  
42

43 407 *Conflict of interests*  
44

45  
46 408 DH received a grant from Alibaba (China) Co. Ltd., Collaborative Research grant. Other  
47 409 authors declared no conflict of interest.  
48  
49  
50

51 410 *Author's contributions*  
52

53  
54 411 XC and ZH designed the study and searched the literature. XC, ZH, and JW extracted the data  
55 412 and evaluated the quality. XC conducted the statistical analysis. XC, ZH, and JW wrote the full  
56  
57  
58  
59  
60

1  
2  
3  
4  
5  
6  
7  
8  
9  
10  
11  
12  
13  
14  
15  
16  
17  
18  
19  
20  
21  
22  
23  
24  
25  
26  
27  
28  
29  
30  
31  
32  
33  
34  
35  
36  
37  
38  
39  
40  
41  
42  
43  
44  
45  
46  
47  
48  
49  
50  
51  
52  
53  
54  
55  
56  
57  
58  
59  
60

413 manuscript. SZ, MSCW, MKCC, DH, and JL provided critical revision of the manuscript for  
414 important intellectual content. All authors discussed the results, and approved the final version  
415 of the manuscript for publication.

416  
417  
418

For peer review only

419 **References:**

- 420 1. Chan JF-W, Yuan S, Kok K-H, To KK-W, Chu H, Yang J, et al. A familial cluster of pneumonia  
421 associated with the 2019 novel coronavirus indicating person-to-person transmission: a study of a family  
422 cluster. *The Lancet*. 2020;395(10223):514-23.
- 423 2. Team EE. Note from the editors: World Health Organization declares novel coronavirus (2019-nCoV)  
424 sixth public health emergency of international concern. *Eurosurveillance*. 2020;25(5):200131e.
- 425 3. Zhao S, Lin Q, Ran J, Musa SS, Yang G, Wang W, et al. Preliminary estimation of the basic  
426 reproduction number of novel coronavirus (2019-nCoV) in China, from 2019 to 2020: A data-driven  
427 analysis in the early phase of the outbreak. *International Journal of Infectious Diseases*. 2020;92:214-7.
- 428 4. Zou L, Ruan F, Huang M, Liang L, Huang H, Hong Z, et al. SARS-CoV-2 viral load in upper  
429 respiratory specimens of infected patients. *New England Journal of Medicine*. 2020;382(12):1177-9.
- 430 5. Lee S, Kim T, Lee E, Lee C, Kim H, Rhee H, et al. Clinical course and molecular viral shedding  
431 among asymptomatic and symptomatic patients With SARS-CoV-2 infection in a community treatment  
432 center in the republic of Korea. *JAMA Internal Medicine*. 2020.
- 433 6. He X, Lau EH, Wu P, Deng X, Wang J, Hao X, et al. Temporal dynamics in viral shedding and  
434 transmissibility of COVID-19. *Nature medicine*. 2020;26(5):672-5.
- 435 7. Bai Y, Yao L, Wei T, Tian F, Jin D-Y, Chen L, et al. Presumed asymptomatic carrier transmission of  
436 COVID-19. *Jama*. 2020;323(14):1406-7.
- 437 8. Hoehl S, Rabenau H, Berger A, Kortenbusch M, Cinatl J, Bojkova D, et al. Evidence of SARS-CoV-2  
438 infection in returning travelers from Wuhan, China. *New England Journal of Medicine*.  
439 2020;382(13):1278-80.
- 440 9. Pan Y, Yu X, Du X, Li Q, Li X, Qin T, et al. Epidemiological and clinical characteristics of 26  
441 asymptomatic severe acute respiratory syndrome coronavirus 2 carriers. *The Journal of Infectious  
442 Diseases*. 2020;221(12):1940-7.
- 443 10. Lauer SA, Grantz KH, Bi Q, Jones FK, Zheng Q, Meredith HR, et al. The incubation period of  
444 coronavirus disease 2019 (COVID-19) from publicly reported confirmed cases: estimation and application.  
445 *Annals of internal medicine*. 2020.
- 446 11. Chen Y, Wang A, Yi B, Ding K, Wang H, Wang J, et al. Epidemiological characteristics of infection  
447 in COVID-19 close contacts in Ningbo city. *Zhonghua liu Xing Bing xue za zhi= Zhonghua*



- 1  
2  
3  
4  
5 448 Liuxingbingxue Zazhi. 2020;41(5):667-71.  
6  
7 449 12. Shenzhen Municipality health Commission. The collection of outbreak situation reports of COVID-19 in  
8 shenzhen, Shenzhen Municipality health Commission. 2020 [Available from: <http://wjw.sz.gov.cn/yqxx/>.  
9 450  
10  
11 451 13. Municipality TPsGoB. Notice of the State Council on the Joint Prevention and Control Mechanism  
12 for the Prevention and Control of the Novel Coronavirus Infection and Pneumonia Epidemic on Issuing the  
13 452 Regulations for the Management of Asymptomatic Patients with the New Coronavirus  
14 453 [http://www.beijing.gov.cn/zhengce/zhengcefagui/202004/t20200409\_1798158.html.  
15 454  
16  
17 455 14. Varghese GM, John R, Manesh A, Karthik R, Abraham OC. Clinical management of COVID-19.  
18 456 Indian Journal of Medical Research. 151(5):401-10.  
19  
20  
21 457 15. Mizumoto K, Kagaya K, Zarebski A, Chowell G. Estimating the asymptomatic proportion of  
22 458 coronavirus disease 2019 (COVID-19) cases on board the Diamond Princess cruise ship, Yokohama,  
23 459 Japan, 2020. Euro Surveillance: Bulletin European sur les Maladies Transmissibles = European  
24 460 Communicable Disease Bulletin. 2020;25(10):03.  
25  
26  
27  
28 461 16. Gao WJ, LM L. Research progress on the incubation period of new coronavirus pneumonia or the  
29 462 transmission of recessive infections. Chinese Journal of Epidemiology|. 2020;41 (4):485-8.  
30  
31  
32 463 17. Moher D, Shamseer L, Clarke M, Ghersi D, Liberati A, Petticrew M, et al. Preferred reporting items  
33 464 for systematic review and meta-analysis protocols (PRISMA-P) 2015 statement. Systematic reviews.  
34 465 2015;4(1):1.  
35  
36  
37 466 18. Downes MJ, Brennan ML, Williams HC, Dean RS. Development of a critical appraisal tool to assess  
38 467 the quality of cross-sectional studies (AXIS). BMJ open. 2016;6(12):e011458.  
39  
40  
41 468 19. Marsh A, Eslick EM, Eslick GD. Does a diet low in FODMAPs reduce symptoms associated with  
42 469 functional gastrointestinal disorders? A comprehensive systematic review and meta-analysis. European  
43 470 journal of nutrition. 2016;55(3):897-906.  
44  
45  
46  
47 471 20. Duval S, Tweedie R. Trim and fill: a simple funnel-plot-based method of testing and adjusting for  
48 472 publication bias in meta-analysis. Biometrics. 2000;56(2):455-63.  
49  
50  
51 473 21. Nishiura H, Kobayashi T, Miyama T, Suzuki A, Jung S-m, Hayashi K, et al. Estimation of the  
52 474 asymptomatic ratio of novel coronavirus infections (COVID-19). International journal of infectious  
53 475 diseases. 2020;94:154.  
54  
55  
56 476 22. Mizumoto K, Kagaya K, Zarebski A, Chowell G. Estimating the asymptomatic proportion of  
57 477 coronavirus disease 2019 (COVID-19) cases on board the Diamond Princess cruise ship, Yokohama,

- 1  
2  
3  
4  
5 478 Japan, 2020. *Eurosurveillance*. 2020;25(10):2000180.
- 6  
7 479 23. Cai J, Sun W, Huang J, Gamber M, Wu J, He G. Clinical features and the treatment of children with  
8  
9 480 COVID-19: A case series from Wenzhou, China. *Journal of Medical Virology*. 2020.
- 10  
11 481 24. Hu Z, Song C, Xu C, Jin G, Chen Y, Xu X, et al. Clinical characteristics of 24 asymptomatic  
12  
13 482 infections with COVID-19 screened among close contacts in Nanjing, China. *Science China Life Sciences*.  
14  
15 483 2020;63(5):706-11.
- 16  
17 484 25. Hu Z, Song C, Xu C, Jin G, Chen Y, Xu X, et al. Clinical characteristics of 24 asymptomatic  
18  
19 485 infections with COVID-19 screened among close contacts in Nanjing, China. *Science China Life sciences*.  
20  
21 486 2020;63(5):706-11.
- 22  
23 487 26. Breslin N, Baptiste C, Gyamfi-Bannerman C, Miller R, Martinez R, Bernstein K, et al. Coronavirus  
24  
25 488 disease 2019 infection among asymptomatic and symptomatic pregnant women: two weeks of confirmed  
26  
27 489 presentations to an affiliated pair of New York City hospitals. *American journal of obstetrics &*  
28  
29 490 *gynecology MFM*. 2020;2(2):100118.
- 30  
31 491 27. McMichael TM, Currie DW, Clark S, Pogojans S, Kay M, Schwartz NG, et al. Epidemiology of  
32  
33 492 Covid-19 in a Long-Term Care Facility in King County, Washington. *The New England journal of*  
34  
35 493 *medicine*. 2020;382(21):2005-11.
- 36  
37 494 28. Bosch-Amate X, Giavedoni P, Podlipnik S, Andreu-Febrer C, Sanz-Beltran J, Garcia-Herrera A, et al.  
38  
39 495 Retiform purpura as a dermatological sign of coronavirus disease 2019 (COVID-19) coagulopathy. *Journal*  
40  
41 496 *of the European Academy of Dermatology and Venereology*. 2020.
- 42  
43 497 29. He J, Guo Y, Mao R, Zhang J. Proportion of asymptomatic coronavirus disease 2019: A systematic  
44  
45 498 review and meta-analysis. *Journal of medical virology*. 2020.
- 46  
47 499 30. Government H. There are three cases of asymptomatic infection in Wuhan, and only the third is  
48  
49 500 infectious 2020 [Available from:  
50  
51 501 [https://www.hubei.gov.cn/jkhh/jkdjt/jkrd/202005/t20200520\\_2280300.shtml](https://www.hubei.gov.cn/jkhh/jkdjt/jkrd/202005/t20200520_2280300.shtml).
- 52  
53 502 31. The Government of Hong Kong SAR. Latest situation of COVID-19 cases (as of September 14,  
54  
55 503 2020). Available at COVID-19 Thematic Website: <https://www.coronavirus.gov.hk/sim/index.html>.  
56  
57 504 [accessed 15 Sep 2020].
- 58  
59 505 32. Padula WV. *Why Only Test Symptomatic Patients? Consider Random Screening for COVID-19*.  
60  
506 Springer; 2020.
- 507 33. Tao J, Zhang X, Zhang X, Zhao S, Yang L, He D, et al. The time serial distribution and influencing

- 1  
2  
3  
4  
5 508 factors of asymptomatic COVID-19 cases in Hong Kong. *One Health*. 2020.  
6  
7 509 34. Korber B, Fischer WM, Gnanakaran S, Yoon H, Theiler J, Abfalterer W, et al. Tracking changes in  
8 510 SARS-CoV-2 Spike: evidence that D614G increases infectivity of the COVID-19 virus. *Cell*.  
9 511 2020;182(4):812-27. e19.  
10  
11  
12 512 35. He X, Lau EHY, Wu P, Deng X, Wang J, Hao X, et al. Temporal dynamics in viral shedding and  
13 513 transmissibility of COVID-19. *Nat Med*. 2020:1-4.  
14  
15  
16 514 36. Wan Y, Shang J, Graham R, Baric RS, Li F. Receptor recognition by the novel coronavirus from  
17 515 Wuhan: an analysis based on decade-long structural studies of SARS coronavirus. *Journal of virology*.  
18 516 2020;94(7).  
19  
20  
21 517 37. Benvenuto D, Demir AB, Giovanetti M, Bianchi M, Angeletti S, Pascarella S, et al. Evidence for  
22 518 mutations in SARS-CoV-2 Italian isolates potentially affecting virus transmission. *J Med Virol*. 2020.  
23  
24  
25 519 38. Kronbichler A, Kresse D, Yoon S, Lee KH, Effenberger M, Shin JI. Asymptomatic patients as a  
26 520 source of COVID-19 infections: A systematic review and meta-analysis. *International Journal of Infectious*  
27 521 *Diseases*. 2020;98:180-6.  
28  
29  
30  
31 522 39. Higgins JP. Commentary: Heterogeneity in meta-analysis should be expected and appropriately  
32 523 quantified. *International journal of epidemiology*. 2008;37(5):1158-60.  
33  
34  
35 524 40. Zhu JY, Pang JL, ZM Z. Clinical Characteristics of COVID-19 Patients : a Meta-analysis. *Practical*  
36 525 *Journal of Cardiac Cerebral Pneumal and Vascular Disease*. 2020;28 (6):6-12.  
37  
38  
39  
40  
41  
42  
43  
44  
45  
46  
47  
48  
49  
50  
51  
52  
53  
54  
55  
56  
57  
58  
59  
60

## Tables and Figures Legends

**Table 1** Results of univariate and multivariate meta-regression analysis

**Figure 1** Selection of articles for systematic review

**Figure 2** Meta-analysis of the asymptomatic ratio among ascertained COVID-19 infections (including and excluding pre-symptomatic infections)

**Figure 3** Asymptomatic ratio among ascertained COVID-19 infections by patient group, age group, screening study, region, and time trend

**Supplementary Table 1** Search strategy for systematic review

**Supplementary Table 2** Characteristics of the studies included for meta-analysis

**Supplementary Table 3** Quality assessment of selected articles

**Supplementary Table 4** Results of sensitivity analysis

**Table 1 Results of Univariate and Multivariate Meta-regression Analysis**

| Variable             | Univariate Regression Analysis |               |               |       | Multivariate Regression Analysis |               |       |
|----------------------|--------------------------------|---------------|---------------|-------|----------------------------------|---------------|-------|
|                      | No. of Studies (%)             | Crude Meta-RR | 95% CI        | p     | Adjusted Meta-RR                 | 95% CI        | p     |
| <b>Patient Group</b> |                                |               |               |       |                                  |               |       |
| Children             | 10 (7.35%)                     | 1 (Reference) | 1 (Reference) |       | 1 (Reference)                    | 1 (Reference) |       |
| Pregnant             | 5 (3.68%)                      | 1.13          | (0.85-1.48)   | 0.398 | 1.12                             | (0.82-1.53)   | 0.457 |
| General population   | 121 (89.97%)                   | 0.88          | (0.76-1.01)   | 0.075 | 0.89                             | (0.73-1.08)   | 0.227 |
| <b>Age</b>           |                                |               |               |       |                                  |               |       |
| ≤18y                 | 9 (6.61%)                      | 1 (Reference) | 1 (Reference) |       | 1 (Reference)                    | 1 (Reference) |       |
| 19-45y               | 49 (36.03%)                    | 0.95          | (0.79-1.13)   | 0.565 | 1.05                             | (0.82-1.34)   | 0.712 |
| >45y                 | 49 (36.03%)                    | 0.88          | (0.74-1.05)   | 0.165 | 1.00                             | (0.78-1.27)   | 0.992 |
| NM                   | 29 (21.32%)                    | 0.98          | (0.81-1.17)   | 0.798 | 1.09                             | (0.86-1.37)   | 0.478 |
| <b>Screening</b>     |                                |               |               |       |                                  |               |       |

|    |                       |              |               |               |       |               |                    |
|----|-----------------------|--------------|---------------|---------------|-------|---------------|--------------------|
| 1  |                       |              |               |               |       |               |                    |
| 2  |                       |              |               |               |       |               |                    |
| 3  |                       |              |               |               |       |               |                    |
| 4  | Non-screening studies | 112 (82.35%) | 1 (Reference) | 1 (Reference) |       | 1 (Reference) | 1 (Reference)      |
| 5  |                       |              |               |               |       |               |                    |
| 6  | Screening studies     | 24 (17.65%)  | 1.14          | (1.05 -1.25)  | 0.003 | 1.08          | (0.98-1.20) 0.113  |
| 7  |                       |              |               |               |       |               |                    |
| 8  |                       |              |               |               |       |               |                    |
| 9  | <b>Region</b>         |              |               |               |       |               |                    |
| 10 |                       |              |               |               |       |               |                    |
| 11 | US                    | 6 (4.51%)    | 1 (Reference) | 1 (Reference) |       | 1 (Reference) | 1 (Reference)      |
| 12 |                       |              |               |               |       |               |                    |
| 13 | China                 | 109 (81.95%) | 0.96          | (0.83-1.11)   | 0.569 | 1.12          | (0.96-1.31) 0.159  |
| 14 |                       |              |               |               |       |               |                    |
| 15 | Europe                | 9 (6.77%)    | 1.07          | (0.89-1.29)   | 0.468 | 1.04          | (0.87-1.24) 0.645  |
| 16 |                       |              |               |               |       |               |                    |
| 17 | Asia (exclude China)  | 9 (6.77%)    | 1.12          | (0.92-1.36)   | 0.274 | 1.26          | (1.04-1.53) 0.019  |
| 18 |                       |              |               |               |       |               |                    |
| 19 |                       |              |               |               |       |               |                    |
| 20 |                       |              |               |               |       |               |                    |
| 21 | <b>Time Trend</b>     |              |               |               |       |               |                    |
| 22 |                       |              |               |               |       |               |                    |
| 23 | Before March 2020     | 85 (62.50%)  | 1 (Reference) | 1 (Reference) |       | 1 (Reference) | 1 (Reference)      |
| 24 |                       |              |               |               |       |               |                    |
| 25 | March 2020 afterwards | 10 (7.35%)   | 1.23          | (1.09-1.39)   | 0.001 | 1.27          | (1.08-1.50)_ 0.005 |
| 26 |                       |              |               |               |       |               |                    |
| 27 | NM                    | 41 (30.15%)  | 1.07          | (1.00-1.16)   | 0.039 | 1.07          | (1.00-1.15) 0.061  |
| 28 |                       |              |               |               |       |               |                    |
| 29 | NM, not mentioned.    |              |               |               |       |               |                    |
| 30 |                       |              |               |               |       |               |                    |
| 31 |                       |              |               |               |       |               |                    |
| 32 |                       |              |               |               |       |               |                    |
| 33 |                       |              |               |               |       |               |                    |
| 34 |                       |              |               |               |       |               |                    |
| 35 |                       |              |               |               |       |               |                    |
| 36 |                       |              |               |               |       |               |                    |
| 37 |                       |              |               |               |       |               |                    |
| 38 |                       |              |               |               |       |               |                    |
| 39 |                       |              |               |               |       |               |                    |
| 40 |                       |              |               |               |       |               |                    |
| 41 |                       |              |               |               |       |               |                    |
| 42 |                       |              |               |               |       |               |                    |
| 43 |                       |              |               |               |       |               |                    |
| 44 |                       |              |               |               |       |               |                    |
| 45 |                       |              |               |               |       |               |                    |
| 46 |                       |              |               |               |       |               |                    |

Figure 1

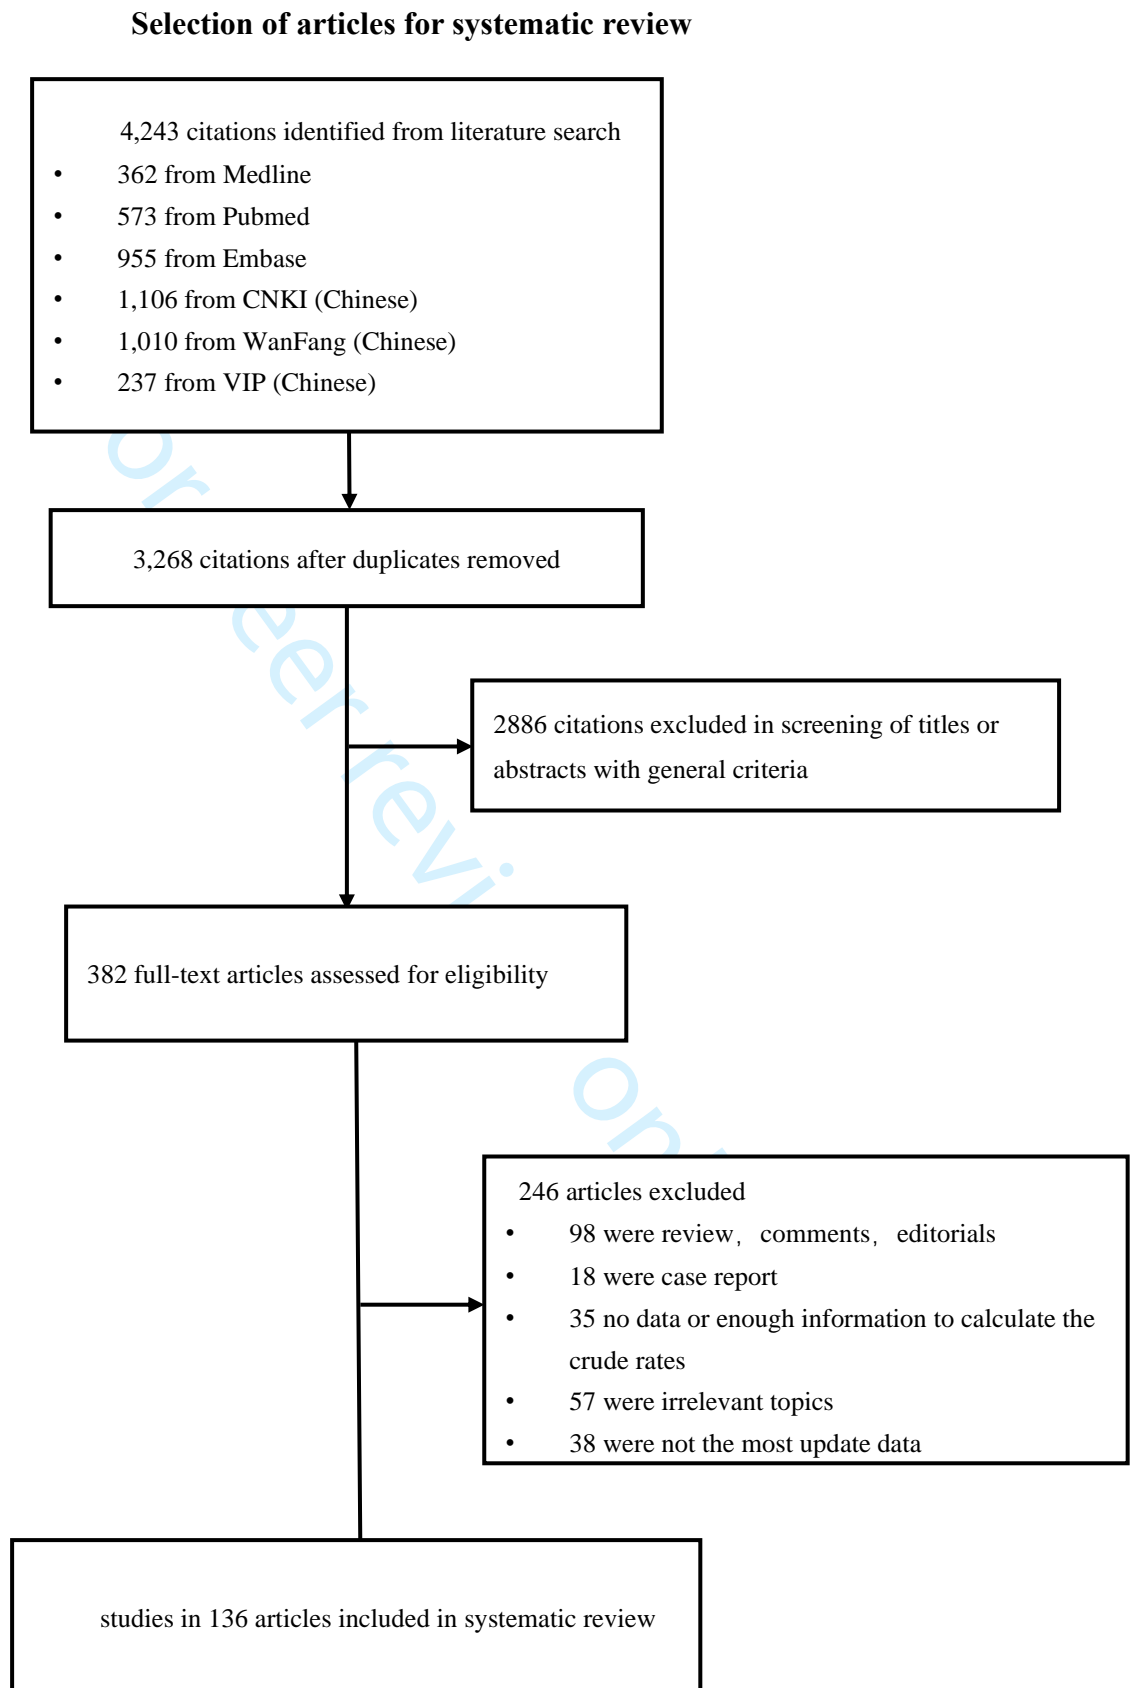





**Figure 3 Asymptomatic ratio among COVID-19 patients by patient group, age group, screening study, region, and time trend**

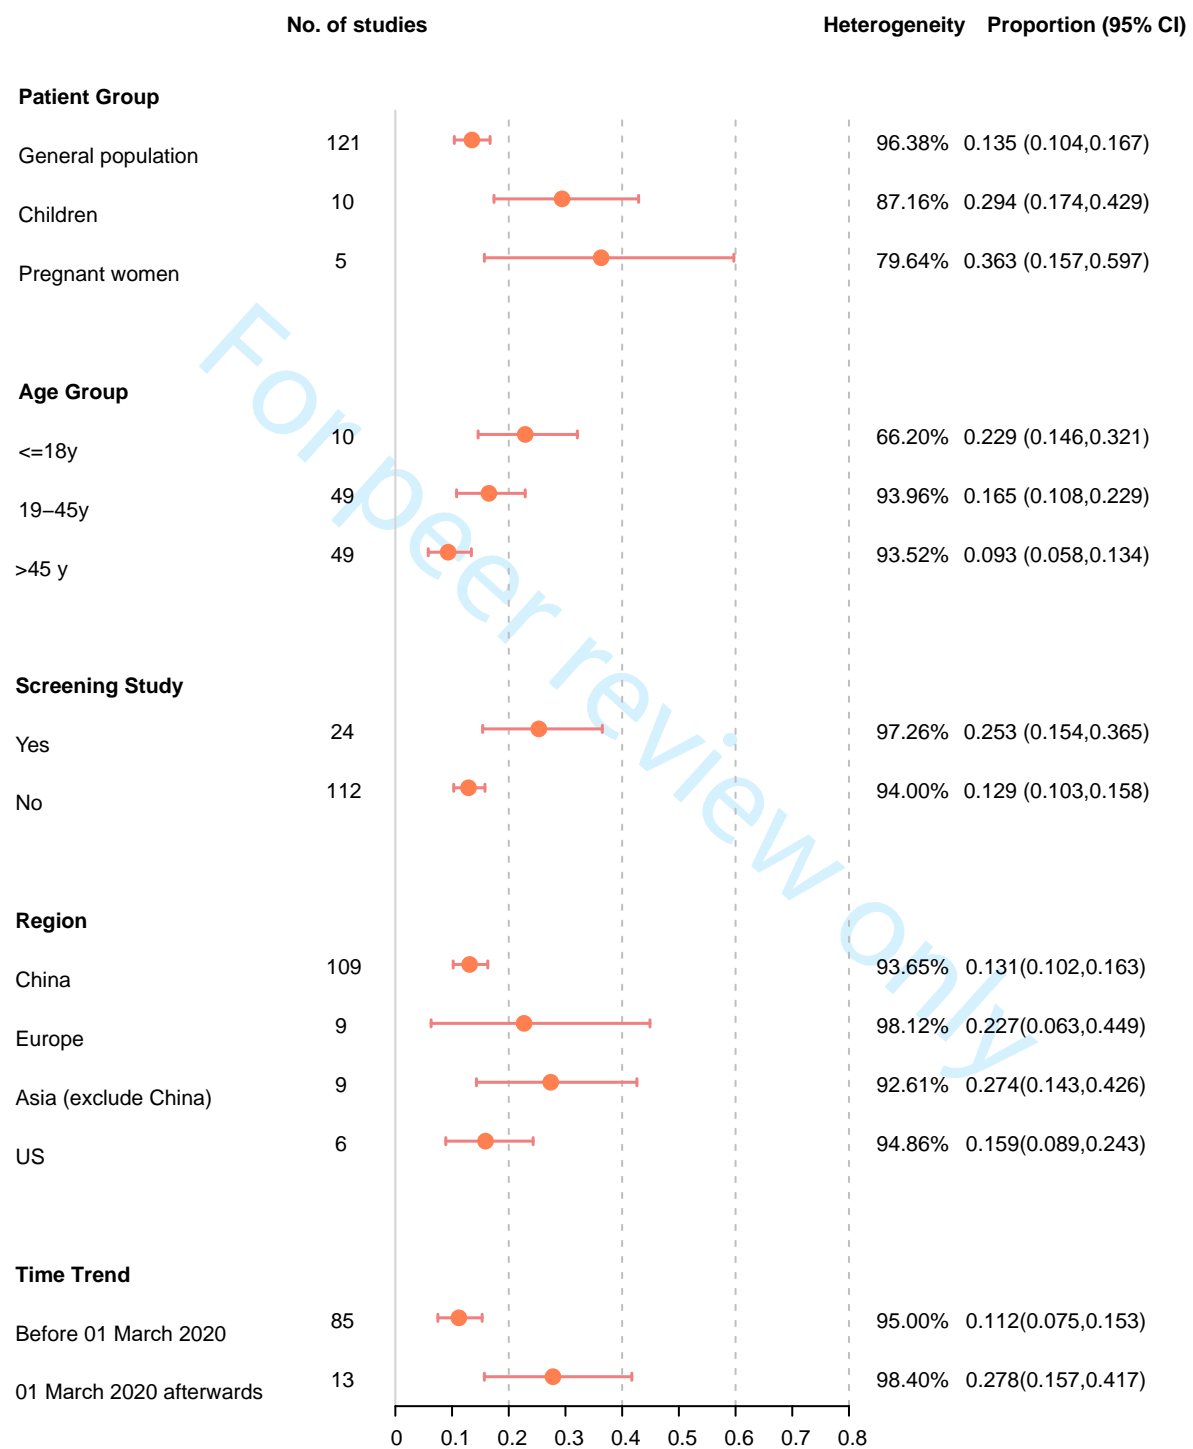

1  
2  
3  
4 **Supplementary Tables and Figure Legends**

5 **Supplementary Table 1** Search strategy for systematic review

6  
7 **Supplementary Table 2** Characteristics of the studies included for meta-analysis

8  
9 **Supplementary Table 3** Quality assessment of selected articles

10  
11 **Supplementary Table 4** Results of sensitivity analysis

12  
13  
14  
15  
16  
17  
18  
19  
20  
21  
22  
23  
24  
25  
26  
27  
28  
29  
30  
31  
32  
33  
34  
35  
36  
37  
38  
39  
40  
41  
42  
43  
44  
45  
46  
47  
48  
49  
50  
51  
52  
53  
54  
55  
56  
57  
58  
59  
60

For peer review only

**Supplementary Table 1 Search strategy for systematic review**  
**Medline (n=362)**

| # ▲ | Searches                              | Results |
|-----|---------------------------------------|---------|
| 1   | SARS-CoV-2.mp.                        | 2844    |
| 2   | COVID-19.mp.                          | 10022   |
| 3   | 2019-nCoV.mp.                         | 509     |
| 4   | novel coronavirus.mp.                 | 1585    |
| 5   | coronavirus 2019.mp.                  | 296     |
| 6   | 2019 coronavirus.mp.                  | 81      |
| 7   | Wuhan coronavirus.mp.                 | 11      |
| 8   | Wuhan pneumonia.mp.                   | 9       |
| 9   | 1 or 2 or 3 or 4 or 5 or 6 or 7 or 8  | 10428   |
| 10  | Asymptomatic.tw.                      | 132670  |
| 11  | Asymptomatic Carrier*.tw.             | 3086    |
| 12  | Asymptomatic positive*.tw.            | 38      |
| 13  | Asymptomatic Carrier Transmission.tw. | 2       |
| 14  | No symptom*.tw.                       | 7724    |
| 15  | No sign*.tw.                          | 622825  |
| 16  | Asymptomatic individual*.tw.          | 3403    |
| 17  | Asymptomatic person*.tw.              | 706     |
| 18  | Asymptomatic patient*.tw.             | 13664   |
| 19  | Asymptomatic case*.tw.                | 1185    |
| 20  | Asymptomatic carriage.tw.             | 520     |
| 21  | Asymptomatic proportion.tw.           | 6       |
| 22  | Asymptomatic transmission.tw.         | 43      |
| 23  | Symptomless.tw.                       | 1920    |

|    |                                                                                                                                        |        |
|----|----------------------------------------------------------------------------------------------------------------------------------------|--------|
| 24 | Asymptomatic contact.tw.                                                                                                               | 57     |
| 25 | No reported symptom*.tw.                                                                                                               | 22     |
| 26 | No clinical symptom*.tw.                                                                                                               | 1113   |
| 27 | No onset symptom*.tw.                                                                                                                  | 1      |
| 28 | Before symptom onset.tw.                                                                                                               | 251    |
| 29 | Before onset of symptom*.tw.                                                                                                           | 135    |
| 30 | No respiratory symptom*.tw.                                                                                                            | 234    |
| 31 | No typical symptom*.tw.                                                                                                                | 56     |
| 32 | Reported no symptom*.tw.                                                                                                               | 177    |
| 33 | 10 or 11 or 12 or 13 or 14 or 15 or 16 or 17 or 18 or 19 or 20 or 21 or 22 or 23 or 24 or 25 or 26 or 27 or 28 or 29 or 30 or 31 or 32 | 759427 |
| 34 | 9 and 33                                                                                                                               | 362    |

review only

## PubMed (n=573)

| # ▲ | Searches                              | Results |
|-----|---------------------------------------|---------|
| 1   | SARS-CoV-2.mp.                        | 1106    |
| 2   | COVID-19.mp.                          | 2922    |
| 3   | 2019-nCoV.mp.                         | 899     |
| 4   | novel coronavirus.mp.                 | 2656    |
| 5   | coronavirus 2019.mp.                  | 1878    |
| 6   | 2019 coronavirus.mp.                  | 1878    |
| 7   | Wuhan coronavirus.mp.                 | 640     |
| 8   | Wuhan pneumonia.mp.                   | 630     |
| 9   | 1 or 2 or 3 or 4 or 5 or 6 or 7 or 8  | 5630    |
| 10  | Asymptomatic.tw.                      | 153267  |
| 11  | Asymptomatic Carrier*.tw.             | 3641    |
| 12  | Asymptomatic positive*.tw.            | 21404   |
| 13  | Asymptomatic Carrier Transmission.tw. | 705     |
| 14  | No symptom*.tw.                       | 9230    |
| 15  | No sign*.tw.                          | 676976  |
| 16  | Asymptomatic individual*.tw.          | 3830    |
| 17  | Asymptomatic person*.tw.              | 753     |
| 18  | Asymptomatic patient*.tw.             | 14964   |
| 19  | Asymptomatic case*.tw.                | 1329    |
| 20  | Asymptomatic carriage.tw.             | 1315    |
| 21  | Asymptomatic proportion.tw.           | 3907    |
| 22  | Asymptomatic transmission.tw.         | 6822    |
| 23  | Symptomless.tw.                       | 2687    |
| 24  | Asymptomatic contact.tw.              | 2321    |

|    |                                                                                                                                           |        |
|----|-------------------------------------------------------------------------------------------------------------------------------------------|--------|
| 25 | No reported symptom*.tw.                                                                                                                  | 8056   |
| 26 | No clinical symptom*.tw.                                                                                                                  | 60765  |
| 27 | No onset symptom*.tw.                                                                                                                     | 544    |
| 28 | Before symptom onset.tw.                                                                                                                  | 22459  |
| 29 | Before onset of symptom*.tw.                                                                                                              | 14445  |
| 30 | No respiratory symptom*.tw.                                                                                                               | 257    |
| 31 | No typical symptom*.tw.                                                                                                                   | 4180   |
| 32 | Reported no symptom*.tw.                                                                                                                  | 2307   |
| 33 | 10 or 11 or 12 or 13 or 14 or 15 or 16 or 17 or 18 or 19 or 20 or 21 or 22 or<br>23 or 24 or 25 or 26 or 27 or 28 or 29 or 30 or 31 or 32 | 951361 |
| 34 | 9 and 33                                                                                                                                  | 573    |

**Embase (n=955)**

| # ▲ | Searches                              | Results |
|-----|---------------------------------------|---------|
| 1   | SARS-CoV-2.mp.                        | 24274   |
| 2   | COVID-19.mp.                          | 829     |
| 3   | 2019-nCoV.mp.                         | 3251    |
| 4   | novel coronavirus.mp.                 | 557     |
| 5   | coronavirus 2019.mp.                  | 159     |
| 6   | 2019 coronavirus.mp.                  | 17      |
| 7   | Wuhan coronavirus.mp.                 | 10      |
| 8   | Wuhan pneumonia.mp.                   | 26912   |
| 9   | 1 or 2 or 3 or 4 or 5 or 6 or 7 or 8  | 220827  |
| 10  | Asymptomatic.tw.                      | 4583    |
| 11  | Asymptomatic Carrier*.tw.             | 67      |
| 12  | Asymptomatic positive*.tw.            | 3       |
| 13  | Asymptomatic Carrier Transmission.tw. | 14021   |
| 14  | No symptom*.tw.                       | 1031507 |
| 15  | No sign*.tw.                          | 5594    |
| 16  | Asymptomatic individual*.tw.          | 972     |
| 17  | Asymptomatic person*.tw.              | 23180   |
| 18  | Asymptomatic patient*.tw.             | 2113    |
| 19  | Asymptomatic case*.tw.                | 735     |
| 20  | Asymptomatic carriage.tw.             | 8       |
| 21  | Asymptomatic proportion.tw.           | 69      |
| 22  | Asymptomatic transmission.tw.         | 2332    |
| 23  | Symptomless.tw.                       | 79      |

|    |                                                                                                                                           |         |
|----|-------------------------------------------------------------------------------------------------------------------------------------------|---------|
| 24 | Asymptomatic contact.tw.                                                                                                                  | 55      |
| 25 | No reported symptom*.tw.                                                                                                                  | 1770    |
| 26 | No clinical symptom*.tw.                                                                                                                  | 1       |
| 27 | No onset symptom*.tw.                                                                                                                     | 448     |
| 28 | Before symptom onset.tw.                                                                                                                  | 222     |
| 29 | Before onset of symptom*.tw.                                                                                                              | 479     |
| 30 | No respiratory symptom*.tw.                                                                                                               | 98      |
| 31 | No typical symptom*.tw.                                                                                                                   | 341     |
| 32 | Reported no symptom*.tw.                                                                                                                  | 1257281 |
| 33 | 10 or 11 or 12 or 13 or 14 or 15 or 16 or 17 or 18 or 19 or 20 or 21 or 22 or<br>23 or 24 or 25 or 26 or 27 or 28 or 29 or 30 or 31 or 32 | 963     |
| 34 | 9 and 33                                                                                                                                  | 955     |

review only



1  
2  
3  
4  
5 CNKI (n=1,106)

6 FT=("新型冠状病毒"+"新冠肺炎"+"新型冠状病毒肺炎"+"严重急性呼吸综合征冠状病毒  
7 2"+"2019-nCov"+"2019 新型冠状病毒"+"2019 冠状病毒"+"corona virus  
8 disease-19"+"COVID-19"+"SARS-COV-2"+"novel coronavirus pneumonia"+"NCP")and FT=("  
9 无症状"+"无症状携带者"+"无症状患者"+"无症状阳性"+"无症状的阳检测病例"+"检测患者  
10 "+"没有症状"+"无症状感染"+"无症状感染者"+"无临床症状"+"无感染症状"+"无相关感染症  
11 状"+"无临床特征"+"没有临床特征"+"无明显症状"+"没有明显症状"+"隐性感染"+"隐性感染  
12 者")  
13  
14

15  
16 WanFang (n=1,010)

17 (全部:(新型冠状病毒+新冠肺炎+新型冠状病毒肺炎+严重急性呼吸综合征冠状病毒  
18 2+2019-nCov+2019 新型冠状病毒 +2019 冠状病毒 +corona virus  
19 disease-19+COVID-19+SARS-COV-2+novel coronavirus pneumonia+NCP)\*全部:(无症状+无  
20 症状携带者+无症状患者+无症状阳性+无症状的阳检测病例+检测患者+没有症状+无症状感  
21 染+无症状感染者+无临床症状+无感染症状+无相关感染症状+无临床特征+没有临床特征+无  
22 明显症状+没有明显症状+隐性感染+隐性感染者)) \*Date:2019-  
23  
24  
25  
26  
27

28 VIP (n=237)

29 (U=(新型冠状病毒 OR 新冠肺炎 OR 新型冠状病毒肺炎 OR 严重急性呼吸综合征冠状病  
30 毒 2 OR 2019-nCov OR 2019 新型冠状病毒 OR 2019 冠状病毒 OR corona virus disease-19 OR  
31 COVID-19 OR SARS-COV-2 OR novel coronavirus pneumonia OR NCP)) AND (U=(无症状  
32 OR 无症状携带者 OR 无症状患者 OR 无症状阳性 OR 无症状的阳检测病例 OR 检测患  
33 者 OR 没有症状 OR 无症状感染 OR 无症状感染者 OR 无临床症状 OR 无感染症状  
34 OR 无相关感染症状 OR 无临床特征 OR 没有临床特征 OR 无明显症状 OR 没有明显症  
35 状 OR 隐性感染 OR 隐性感染者))  
36  
37  
38  
39  
40  
41  
42  
43  
44  
45  
46  
47  
48  
49  
50  
51  
52  
53  
54  
55  
56  
57  
58  
59  
60

**Supplementary Table 2 Characteristics of the studies included for meta-analysis**

| Author            | City/Province           | Country   | Sample size | Age (mean or median [ $\pm$ SD or IQR]; range) | Study population | Male (%) | Positive patient (n) | The number of test-positive and asymptomatic patients (n) | The number of presymptomatic infections (n) | Confirmed date        |
|-------------------|-------------------------|-----------|-------------|------------------------------------------------|------------------|----------|----------------------|-----------------------------------------------------------|---------------------------------------------|-----------------------|
| Amy V. Dora(1)    | Los Angeles, California | US        | 19          | Median: 75y (66-85)                            | General          | 1.00     | 19                   | 6                                                         | 0                                           | 2020/3/29-2020/3/21   |
| An YH(2)          | Beijing                 | China     | 54          | Median: 48y (37-87)                            | General          | 0.44     | 9                    | 1                                                         | 0                                           | 2020/01/21-2020/03/04 |
| Arima(3)          | Japan                   | Japan     | 566         | NA                                             | General          | NA       | 12                   | 4                                                         | 0                                           | 2020/1-2020/2         |
| Backer JA(4)      | Wuhan                   | China     | 88          | Range: 2y-72y                                  | General          | 0.65     | 88                   | 2                                                         | 0                                           | 2020/01/22-2020/01/29 |
| Bai M(5)          | Wuhan                   | China     | 472         | Mean: 50.7y ( $\pm$ 11.6)                      | General          | 0.46     | 472                  | 37                                                        | 2                                           | 2020/02/12-2020/03/08 |
| Bai R(6)          | Xian                    | China     | 120         | Mean: 43y (1.5-93)                             | General          | 0.48     | 120                  | 25                                                        | 0                                           | 2020/01/01-2020/03/06 |
| Bai SL(7)         | Gansu                   | China     | 8           | Median: 50.5y (2-82)                           | General          | 0.50     | 7                    | 5                                                         | 1                                           | 2020/01/22-2020/01/31 |
| Bin YF(8)         | Wuhan                   | China     | 55          | Mean: 53.9y ( $\pm$ 17. 1)                     | General          | 0.56     | 55                   | 1                                                         | 0                                           | 2020/01/29-2020/02/16 |
| Böhmer(9)         | Bavaria                 | Germany   | 16          | Median: 35y (2-58)                             | General          | 0.75     | 16                   | 2                                                         | 1                                           | 2020/1/1-2020/2/19    |
| Cao JM(10)        | Nanchong                | China     | 25          | Range: 10y-77y                                 | General          | 0.48     | 25                   | 12                                                        | 0                                           | 2020/01/21-2020/02/18 |
| Carla Felice(11)  | NA                      | Italy     | 98          | NA                                             | General          | 0.39     | 18                   | 6                                                         | 0                                           | NA                    |
| Chan JFW(12)      | Wuhan                   | China     | 7           | Mean: 46.17y(10-66)                            | General          | 0.50     | 6                    | 1                                                         | 0                                           | 2020/01/10-2020/01/15 |
| Chen B(13)        | Hainan                  | China     | 69          | Median: 51y (28-83)                            | General          | 0.59     | 69                   | 5                                                         | 0                                           | 2020/01/18-2020/02/29 |
| Chen J(14)        | Shanghai                | China     | 249         | Median: 51y(36-64)                             | General          | 0.51     | 249                  | 7                                                         | 0                                           | 2020/01/20-2020/02/06 |
| Chen T(15)        | Wuhan                   | China     | 76          | Mean: 59.5y (28-86)                            | General          | 0.57     | 76                   | 10                                                        | 0                                           | 2020/01-2020/02       |
| Chen Y(16)        | Ningbo                  | China     | 187         | Median: 12y(30-70)                             | General          | NA       | 191                  | 30                                                        | 0                                           | 2020/01/21-2020/03/06 |
| Chen YJ(17)       | Chongqing               | China     | 143         | Mean: 45.13y (15-79)                           | General          | 0.51     | 143                  | 11                                                        | 0                                           | 2020/01/23-2020/02/08 |
| Cheng ZP(18)      | Yantai                  | China     | 25          | Median: 42y ( $\pm$ 12)                        | General          | 0.56     | 25                   | 1                                                         | 0                                           | 2020/01-2020/02       |
| COVID-19 National | NA                      | Australia | 295         | Median: 47y (0-94)                             | General          | 0.50     | 295                  | 139                                                       | 0                                           | 2020/01/21-2020/03/14 |

|    |                       |                         |        |     |                        |          |       |     |    |   |                       |
|----|-----------------------|-------------------------|--------|-----|------------------------|----------|-------|-----|----|---|-----------------------|
| 1  |                       |                         |        |     |                        |          |       |     |    |   |                       |
| 2  |                       |                         |        |     |                        |          |       |     |    |   |                       |
| 3  |                       |                         |        |     |                        |          |       |     |    |   |                       |
| 4  |                       |                         |        |     |                        |          |       |     |    |   |                       |
| 5  | Incident Room         |                         |        |     |                        |          |       |     |    |   |                       |
| 6  | Surveillance Team(19) |                         |        |     |                        |          |       |     |    |   |                       |
| 7  | Ding Y(20)            | Wuhan                   | China  | 56  | Mean: 54.6y (24-86)    | General  | 0.54  | 56  | 3  | 0 | 2020/01/01-2020/02/03 |
| 8  | Dong X(21)            | Wuhan                   | China  | 11  | Median: 43y (2-69)     | General  | 0.45  | 11  | 1  | 0 | 2020/01/20-2020/02/29 |
| 9  | Dong XC(22)           | Tianjin                 | China  | 135 | Mean: 48.62y (8-90)    | General  | 0.53  | 135 | 4  | 0 | 2020/01/13-2020/02/20 |
| 10 | Dong YY(23)           | Yangzhou                | China  | 37  | Mean: 38.64y (1-74)    | General  | 0.59  | 37  | 14 | 0 | 2020/01-2020/02       |
| 11 | Feng XP(24)           | Jingzhou                | China  | 52  | Median: 46y (30-63)    | General  | 0.64  | 52  | 8  | 0 | 2020/01/23-2020/03/08 |
| 12 | Gao T(25)             | Liaocheng, Xianyang     | China  | 40  | Mean: 41y              | General  | 0.48  | 40  | 4  | 1 | 2020/1/21-2020/2/16   |
| 13 | Gautret P(26)         | NA                      | French | 36  | Mean: 45.1y            | General  | 0.42  | 36  | 6  | 0 | 2020/3/1-2020/3/16    |
| 14 | Gu. Kim(27)           | Daegu                   | Korea  | 213 | NA                     | General  |       | 213 | 41 | 0 |                       |
| 15 | Hu SX(28)             | Hunan                   | China  | 888 | Median: 35y (2-88)     | General  | 0.444 | 888 | 36 | 0 | 2020/01/01-2020/02/08 |
| 16 | Huang DD(29)          | Chongqing               | China  | 89  | Median: 48.2y (±17.9)  | General  | 0.58  | 89  | 6  | 0 | 2020/01/22-2020/02/17 |
| 17 | Ji GH(30)             | jingzhou                | China  | 45  | Mean: 45.4y(21-67)     | General  | 0.60  | 45  | 3  | 0 | 2020/1/19-2020/2/1    |
| 18 | Jia CY(31)            | Beijing                 | China  | 60  | Median: 59.5y (28-91)  | General  | 0.40  | 60  | 1  | 0 | 2020/01/20-2020/02/20 |
| 19 | Jiang R(32)           | Guangzhou               | China  | 25  | Mean: 44.2y (12-86)    | General  | 0.44  | 25  | 1  | 0 | 2020/01/25-2020/03/25 |
| 20 | Jin MH(33)            | Huzhou                  | China  | 10  | Median: 32y (0.58-56)  | General  | 0.50  | 10  | 1  | 0 | 2020/01/25-2020/02/07 |
| 21 |                       | Shenzhen, Guangzhou,    |        |     |                        |          |       |     |    |   |                       |
| 22 | Kang M(34)            | Foshan, Yangjiang,      | China  | 37  | Median: 58y (10-78)    | General  | 0.49  | 37  | 2  | 0 | 2020/01/12-2020/01/23 |
| 23 |                       | Shaoguan                |        |     |                        |          |       |     |    |   |                       |
| 24 | Ke B(35)              | Chongqing               | China  | 25  | Median: 11.0y (0.6-17) | Children | 0.56  | 25  | 8  | 0 | 2020/1/19-2020/3/12   |
| 25 |                       | Seoul, Goyang, Siheung, |        |     |                        |          |       |     |    |   |                       |
| 26 |                       | Bucheon, Gwangju,       |        |     |                        |          |       |     |    |   |                       |
| 27 | Ki M(36)              | Suwon, Incheon,         | Korea  | 28  | Median: 42y (20-73)    | General  | 0.54  | 28  | 3  | 0 | 2020/01/20-2020/02/10 |
| 28 |                       | Pyeongtaek, Gunsan,     |        |     |                        |          |       |     |    |   |                       |
| 29 |                       | Guri, Naju, Evacuated   |        |     |                        |          |       |     |    |   |                       |
| 30 |                       |                         |        |     |                        |          |       |     |    |   |                       |
| 31 |                       |                         |        |     |                        |          |       |     |    |   |                       |
| 32 |                       |                         |        |     |                        |          |       |     |    |   |                       |
| 33 |                       |                         |        |     |                        |          |       |     |    |   |                       |
| 34 |                       |                         |        |     |                        |          |       |     |    |   |                       |
| 35 |                       |                         |        |     |                        |          |       |     |    |   |                       |
| 36 |                       |                         |        |     |                        |          |       |     |    |   |                       |
| 37 |                       |                         |        |     |                        |          |       |     |    |   |                       |
| 38 |                       |                         |        |     |                        |          |       |     |    |   |                       |
| 39 |                       |                         |        |     |                        |          |       |     |    |   |                       |
| 40 |                       |                         |        |     |                        |          |       |     |    |   |                       |
| 41 |                       |                         |        |     |                        |          |       |     |    |   |                       |
| 42 |                       |                         |        |     |                        |          |       |     |    |   |                       |
| 43 |                       |                         |        |     |                        |          |       |     |    |   |                       |
| 44 |                       |                         |        |     |                        |          |       |     |    |   |                       |
| 45 |                       |                         |        |     |                        |          |       |     |    |   |                       |
| 46 |                       |                         |        |     |                        |          |       |     |    |   |                       |

1  
2  
3  
4  
5  
6  
7  
8  
9  
10  
11  
12  
13  
14  
15  
16  
17  
18  
19  
20  
21  
22  
23  
24  
25  
26  
27  
28  
29  
30  
31  
32  
33  
34  
35  
36  
37  
38  
39  
40  
41  
42  
43  
44  
45  
46

|             |                                                                                  |         |     |                           |          |      |     |    |   |                       |  |
|-------------|----------------------------------------------------------------------------------|---------|-----|---------------------------|----------|------|-----|----|---|-----------------------|--|
|             | from Wuhan                                                                       |         |     |                           |          |      |     |    |   |                       |  |
| Lai XQ(37)  | Wuhan                                                                            | China   | 110 | Median: 36.5y (30.0-47.0) | General  | 0.28 | 110 | 3  | 0 | 2020/1/1-2020/2/9     |  |
| Le TQM(38)  | Vinh Phuc Province,<br>Thanh Hoa Province                                        | Vietnam | 12  | Median: 30y (0.25-55)     | General  | 0.33 | 12  | 1  | 0 | 2020/01/21-2020/01/27 |  |
| Lei MY(39)  | Guizhou                                                                          | China   | 146 | NA                        | General  | NA   | 146 | 25 | 0 | 2020/01/21-2020/03/10 |  |
| Li CY(40)   | Xuzhou                                                                           | China   | 7   | Median: 42y (21-62)       | General  | 0.57 | 7   | 1  | 0 | 2020/01/25-2020/01/31 |  |
| Li W(41)    | Zhuhai                                                                           | China   | 5   | Median: 3y (1.4-6)        | Children | 0.80 | 5   | 4  | 0 | 2020/01/28-2020/02/08 |  |
| Li Y(42)    | Wuhan                                                                            | China   | 53  | Mean: 58y (26-83 )        | General  | 0.55 | 51  | 1  | 0 | 2020/01/23-2020/01-29 |  |
| Li Y(43)    | Wuhan                                                                            | China   | 127 | Median: 6y ((0.17-15)     | Children | 0.57 | 127 | 21 | 0 | 2020/1/28-2020/3/12   |  |
| Liao XN(44) | wuhan                                                                            | China   | 42  | Median:51.6y (22-69)      | General  | 0.69 | 42  | 5  | 0 | 2020/01/16-2020/02/18 |  |
| Lin ZF(45)  | Yichang                                                                          | China   | 205 | Median: 56.0y (1.25-88)   | General  | 0.55 | 205 | 15 | 0 | 2020/01/24-2020/03/09 |  |
| Liu BM(46)  | Wuhan                                                                            | China   | 68  | Mean: 44.3y (±16.4)       | General  | 0.37 | 68  | 36 | 0 | 2020/2/7-2020/3/26    |  |
| Liu BY(47)  | Zhejiang                                                                         | China   | 91  | Mean: 33.66y (7-73)       | General  | 0.53 | 91  | 43 | 0 | 2020/03/01-2020/04/07 |  |
| Liu DH(48)  | Wuhan                                                                            | China   | 15  | Mean: 32y (23-40)         | Pregnant | 0.00 | 15  | 2  | 0 | 2020/01/20-2020/02/10 |  |
| Liu F(49)   | Hangzhou                                                                         | China   | 10  | Median: 42y (34-50)       | General  | 0.40 | 10  | 1  | 0 | 2020/01/22-2020/02/22 |  |
| Liu F(50)   | Wuhan                                                                            | China   | 44  | Mean: 30y (22-43)         | Pregnant | 0.00 | 16  | 7  | 0 | 2020/01/11-2020/02/13 |  |
| Liu GT(51)  | Ningxia                                                                          | China   | 70  | Mean: 40y (3-77)          | General  | 0.53 | 70  | 10 | 0 | 2020/01/22-2020/02/17 |  |
| Liu MQ(52)  | Chongqing                                                                        | China   | 5   | Median: 5.2y (0.58-13)    | Children | 0.60 | 5   | 3  | 0 | NA                    |  |
| Liu X(53)   | Chenzhou                                                                         | China   | 5   | Mean: 30y (2.5-56)        | General  | 0.40 | 5   | 1  | 0 | 2020/01/31-2020/02/06 |  |
| Liu YL(54)  | Hubei, Fujian, Shanxi,<br>Beijing, Guangdong,<br>Jiangxi, Heilongjiang,<br>Anhui | China   | 12  | Median: 30y (22-36)       | Pregnant | 0.00 | 13  | 1  | 0 | 2019/12/08-2020/02/25 |  |

|    |                     |                        |             |       |                         |          |      |      |     |    |                       |
|----|---------------------|------------------------|-------------|-------|-------------------------|----------|------|------|-----|----|-----------------------|
| 1  |                     |                        |             |       |                         |          |      |      |     |    |                       |
| 2  |                     |                        |             |       |                         |          |      |      |     |    |                       |
| 3  |                     |                        |             |       |                         |          |      |      |     |    |                       |
| 4  |                     |                        |             |       |                         |          |      |      |     |    |                       |
| 5  | Liu YX(55)          | Shenzhen               | China       | 12    | Median: 62.5y (10-72)   | General  | 0.67 | 12   | 1   | 0  | 2020/01/11-2020/01/20 |
| 6  |                     |                        |             |       |                         |          |      |      |     |    |                       |
| 7  | Liu ZR(56)          | Anhui                  | China       | 15    | Median: 42y (14-84)     | General  | 0.47 | 15   | 2   | 0  | 2020/02/04-2020/02/12 |
| 8  |                     |                        |             |       |                         |          |      |      |     |    |                       |
| 9  | Lu RF(57)           | Nantong                | China       | 28    | Median: 50y (26-73)     | General  | 0.61 | 28   | 1   | 0  | 2020/1/23-2020/2/26   |
| 10 |                     |                        |             |       |                         |          |      |      |     |    |                       |
| 11 | Lu XX(58)           | Wuhan                  | China       | 1391  | Median: 6.7y (0-15)     | Children | 0.61 | 171  | 27  | 0  | 2020/01/28-2020/02/26 |
| 12 | Lu Y(59)            | Guangzhou              | China       | 9     | Mean: 7.8y (0.17- 15)   | Children | 0.56 | 9    | 1   | 0  | 2020/1/22-2020/2/9    |
| 13 | Lucy Rivett(60)     | UK                     | UK          | 1270  | NA                      | General  | 0.00 | 61   | 31  | 24 | 2020/04/06-2020/04/24 |
| 14 |                     |                        |             |       |                         |          |      |      |     |    |                       |
| 15 | Luo SH(61)          | Anqing                 | China       | 83    | NA                      | General  | NA   | 83   | 8   | 7  | till 2020/02/21       |
| 16 | M.M. Arons(62)      | King County            | US          | 76    | Mean: 78.6y (±9.5)      | General  |      | 48   | 27  | 24 | 2020/3/3-2020/3/26    |
| 17 |                     |                        |             |       |                         |          |      |      |     |    |                       |
| 18 | Ma Y(63)            | Jinan                  | China       | 47    | Median: 34y (1-72)      | General  | 0.43 | 47   | 11  | 0  | 2020/1/23-2020/3/10   |
| 19 | Ma YL(64)           | Wuhan                  | China       | 115   | Range: 1.67y-5y         | Children | 0.64 | 115  | 61  | 0  |                       |
| 20 |                     |                        |             |       |                         |          |      |      |     |    |                       |
| 21 | MacIntyre CR(65)    | NA                     | Japan       | 565   | NA                      | General  | NA   | 8    | 5   | 0  | 2020/01/29-2020/01/31 |
| 22 | Martin C(66)        | Brussels               | Belgium     | 326   | Mean: 36y (21-59.)      | General  | 0.24 | 41   | 31  | 0  | 2020/04/15-2020/05/18 |
| 23 | McMichael TM(67)    | King County            | US          | 167   | Median: 72y (21-100)    | General  | 0.33 | 167  | 7   | 0  | 2020/02/28-2020/03/18 |
| 24 |                     |                        |             |       |                         |          |      |      |     |    |                       |
| 25 | Michel Bielecki(68) | Swiss Army Base in     | Switzerland | 508   | Median: 21y (18-28)     | General  | 0.92 | 228  | 126 | 0  | 2020/3/11-2020/5/3    |
| 26 |                     | Airolo                 |             |       |                         |          |      |      |     |    |                       |
| 27 | Miyamae Y(69)       | Tokyo                  | Japan       | 23    | Median: 67y (29-79)     | General  | 0.43 | 23   | 15  | 0  | 2020/02/18-2020/02/25 |
| 28 |                     |                        |             |       |                         |          |      |      |     |    |                       |
| 29 | Mohammed A M        | Somalia                | Somalia     | 182   | Mean: 22y (±4)          | General  | 0.66 | 49   | 16  | 0  | 2020/4/23-2020/5/7    |
| 30 | Ahmed(70)           |                        |             |       |                         |          |      |      |     |    |                       |
| 31 | Moriarty LF(71)     | Yokohama               | Japan       | 3711  | Range: 29y-73y          | General  | 0.55 | 712  | 331 | 0  | 2020/02/05-2020/02/20 |
| 32 |                     |                        |             |       |                         |          |      |      |     |    |                       |
| 33 | Muhammet Furkan     | NA                     | Turkey      | 81    | Median: 9.50y (0-17.75) | Children | 0.59 | 81   | 17  | 0  | 2020/3/5-2020/5/5     |
| 34 | Korkmaz(72)         |                        |             |       |                         |          |      |      |     |    |                       |
| 35 |                     | Long Island, Brooklyn, |             |       |                         |          |      |      |     |    |                       |
| 36 | Nagler AR(73)       | Long Island            | US          | 14746 | NA                      | General  | NA   | 1905 | 536 | 0  | 2020/03/25-2020/05/18 |
| 37 |                     |                        |             |       |                         |          |      |      |     |    |                       |
| 38 | Niu YL(74)          | Suqian                 | China       | 13    | Mean: 32.3y (12-48)     | General  | 0.46 | 13   | 3   | 0  | 2020/01/25-2020/03/03 |
| 39 |                     |                        |             |       |                         |          |      |      |     |    |                       |
| 40 |                     |                        |             |       |                         |          |      |      |     |    |                       |
| 41 |                     |                        |             |       |                         |          |      |      |     |    |                       |
| 42 |                     |                        |             |       |                         |          |      |      |     |    |                       |
| 43 |                     |                        |             |       |                         |          |      |      |     |    |                       |
| 44 |                     |                        |             |       |                         |          |      |      |     |    |                       |
| 45 |                     |                        |             |       |                         |          |      |      |     |    |                       |
| 46 |                     |                        |             |       |                         |          |      |      |     |    |                       |

1  
2  
3  
4  
5  
6  
7  
8  
9  
10  
11  
12  
13  
14  
15  
16  
17  
18  
19  
20  
21  
22  
23  
24  
25  
26  
27  
28  
29  
30  
31  
32  
33  
34  
35  
36  
37  
38  
39  
40  
41  
42  
43  
44  
45  
46

|                       |               |                                                                      |      |                              |          |      |      |     |   |                        |
|-----------------------|---------------|----------------------------------------------------------------------|------|------------------------------|----------|------|------|-----|---|------------------------|
| Ou JM(75)             | Fujian        | China                                                                | 298  | Median: 42y (0.42-93)        | General  | 0.55 | 298  | 3   | 0 | till 2020/02/21        |
| Pan XQ(76)            | Wenzhou       | China                                                                | 64   | Mean: 48.8y ( $\pm 12.9$ )   | General  | 0.61 | 64   | 6   | 0 | 2020/02/05-2020/02/20  |
| Pongpirul WA(77)      | Bangkok       | Tailand                                                              | 11   | Median: 61y (28-74)          | General  | 0.55 | 11   | 1   | 0 | 2020/01/08-2020/01/31  |
| Seong Eun Kim(78)     | NA            | Korea                                                                | 71   | Median: 31y (17.8-55.8)      | General  | 0.46 | 71   | 13  | 3 | NA                     |
| She X(79)             | Suining       | China                                                                | 9    | Mean: 29y (24-35)            | General  | 0.33 | 9    | 1   | 0 | 2020/01/20-2020/02/12  |
| Song W(80)            | Xiangyang     | China                                                                | 16   | Median: 8.5y (0.96-14y)      | Children | 0.63 | 16   | 8   | 0 | 2020/01/01-2020/03/17  |
| Spiteri G(81)         | NA            | Belgium, Finland,<br>France, Germany, Italy,<br>Russia, Spain,Sweden | 38   | Median: 42y (2-81)           | General  | 0.66 | 38   | 2   | 0 | 2020/01/17-2020/02/21  |
| Sun DF(82)            | Jiaxing       | China                                                                | 30   | Mean: 49y (30-71)            | General  | 0.50 | 30   | 1   | 0 | 2020/01/24-2020/02/06  |
| Sun WW(83)            | Zhejiang      | China                                                                | 391  | NA                           | General  | 0.41 | 391  | 54  | 0 | 2020/01/08-2020/02/06  |
| Sun Z(84)             | Anhui         | China                                                                | 21   | Mean: 40.52y ( $\pm 17.14$ ) | General  | 0.52 | 21   | 4   | 0 | 2020/01/23-2020/03/08  |
| Tang A(85)            | Zhoushan      | China                                                                | 10   | Mean: 50.9y (28-67)          | General  | 0.70 | 10   | 5   | 5 | till 2020/02/17        |
| Tian SJ(86)           | Beijing       | China                                                                | 262  | Median: 47.5y (1-94)         | General  | 0.49 | 262  | 13  | 0 | till 2020/02/10        |
| Timothy J. Judson(87) | San Francisco | US                                                                   | 1129 | NA                           | General  | NA   | 1129 | 315 | 0 |                        |
| Tolia VM(88)          | San Diego     | US                                                                   | 283  | NA                           | General  | 0.53 | 29   | 2   | 0 | 20020/03/10-2020/03-19 |
| Tong H(89)            | Bengbu        | China                                                                | 24   | Mean: 53y (17-74)            | General  | 0.63 | 24   | 4   | 0 | 2020/01/10-2020/02/15  |
| Tong ZD(90)           | Zhoushan      | China                                                                | 7    | Median: 28.5y (12-45).       | General  | 0.43 | 7    | 3   | 0 | 2020/1/1               |
| Treibel TA(91)        | London        | UK                                                                   | 1523 | NA                           | General  | NA   | 1523 | 65  | 0 | since2020/3/23         |
| Wan R(92)             | NA            | NA                                                                   | 78   | NA                           | General  | NA   | 78   | 2   | 0 |                        |
| Wang AH(93)           | Chongqing     | China                                                                | 29   | Mean: 48.19y (3-89)          | General  | 0.64 | 90   | 3   | 0 | till 2020/03/01        |
| Wang D(94)            | Chongqing     | China                                                                | 576  | Mean: 54.79y                 | General  | 0.41 | 61   | 38  | 0 | 2020/1/24-2020/3/10    |
| Wang JC(95)           | Nanjing       | China                                                                | 52   | Mean: 44y (13-73)            | General  | 0.56 | 52   | 2   | 0 | 2020/01/19-2020/02/03  |
| Wang KS(96)           | Pingyang      | China                                                                | 138  | Median: 48y (33-68)          | General  | 0.22 | 9    | 3   | 0 | 2020/01/19-2020/02/03  |

|    |               |           |       |      |                                   |          |      |      |     |    |                       |
|----|---------------|-----------|-------|------|-----------------------------------|----------|------|------|-----|----|-----------------------|
| 1  |               |           |       |      |                                   |          |      |      |     |    |                       |
| 2  |               |           |       |      |                                   |          |      |      |     |    |                       |
| 3  |               |           |       |      |                                   |          |      |      |     |    |                       |
| 4  |               |           |       |      |                                   |          |      |      |     |    |                       |
| 5  | Wang S(97)    | Yichang   | China | 738  | Range: 0.58y-91y                  | General  | 0.51 | 70   | 70  | 0  | 2020/02/11-2020/02/23 |
| 6  | Wang T(98)    | Jilin     | China | 50   | Mean: 44.52y (16-87)              | General  | 0.60 | 50   | 1   | 0  | 2020/01/28-2020/02/21 |
| 7  |               |           |       |      |                                   |          |      |      |     |    |                       |
| 8  | Wang XB(99)   | Wuhan     | China | 1012 | Median: 50y (16-89)               | General  | 0.52 | 1012 | 30  | 16 | 2020/02/07-2020/02/12 |
| 9  | Wong HYF(100) | Hongkong  | China | 64   | Mean: 56y (16-96)                 | General  | 0.41 | 64   | 9   | 0  | 2020/1/1-2020/3/31    |
| 10 | Wu GY(101)    | Wenzhou   | China | 104  | Mean: 45y (±13)                   | General  | 0.57 | 104  | 2   | 0  | 2020/01/17-2020/02/04 |
| 11 | Wu HP(102)    | Jiangxi   | China | 23   | Range: 0.25y-17.67y               | Children | 0.39 | 23   | 3   | 0  | 2020/01/21-2020/02/29 |
| 12 |               |           |       |      |                                   |          |      |      |     |    |                       |
| 13 | Wu QR(103)    | Ganzhou   | China | 55   | Mean: 45.22y (0.25-79)            | General  | 0.51 | 55   | 2   | 0  | 2020/1/23-2020/3/2    |
| 14 | Wu XQ(104)    | Wuhan     | China | 23   | Median: 29y (21-37)               | Pregnant | 0.00 | 23   | 15  | 0  | 2019/12/31-2020/03/07 |
| 15 |               |           |       |      |                                   |          |      |      |     |    |                       |
| 16 | Wu Y(105)     | Nantong   | China | 23   | Median: 48y (26-68)               | General  | 0.65 | 23   | 1   | 0  | NA                    |
| 17 | Wu YL(106)    | Chengde   | China | 8    | Range: 22y-56y                    | General  | 0.50 | 8    | 7   | 0  | 2020/1/24-2020/3/31   |
| 18 |               |           |       |      |                                   |          |      |      |     |    |                       |
| 19 | Xiang TX(107) | Jiangxi   | China | 49   | Mean: 42.9y (18-78)               | General  |      | 49   | 3   | 0  | 2020/1/21-2020/1/27   |
| 20 | Xiao KH(108)  | Chongqing | China | 143  | Mean: 45.13y (±1.04)              | General  | 0.49 | 143  | 11  | 0  | 2020/01/23-2020/02/08 |
| 21 | Xie JW(109)   | Chongqing | China | 6    | Median: 46y (40-67)               | General  | 0.67 | 6    | 3   | 2  | 2020/01/29-2020/02/03 |
| 22 |               |           |       |      |                                   |          |      |      |     |    |                       |
| 23 | Xie YB(110)   | Yongjia   | China | 39   | Median: 52y (22-87)               | General  | 0.56 | 39   | 5   | 0  | 2020/01/20-2020/02/10 |
| 24 | Xu TM(111)    | Changzhou | China | 51   | NA                                | General  | 0.33 | 51   | 6   | 0  | 2020/1/23-2020/2/18   |
| 25 |               |           |       |      |                                   |          |      |      |     |    |                       |
| 26 | Yang K(112)   | Nanjing   | China | 57   | Median: 37y (5-97)                | General  | 0.51 | 57   | 13  | 0  |                       |
| 27 | Yang RR(113)  | Wuhan     | China | 78   | Median: 37y (26-45)               | General  | 0.33 | 78   | 33  | 0  | 2019/12/24-2020/02/24 |
| 28 | Yang YL(114)  | Chongqing | China | 8    | Median: 53y (9-67)                | General  | 0.63 | 8    | 1   | 0  | 2020/02/01-2020/02/16 |
| 29 |               |           |       |      |                                   |          |      |      |     |    |                       |
| 30 | Yang YX(115)  | Chibi     | China | 88   | Range: 10y-89y                    | General  | 0.60 | 88   | 1   | 0  | 2020/01-2020/02       |
| 31 | Yao QD(116)   | Wuhan     | China | 45   | Mean: 47.7y (25-88)               | General  | 0.36 | 45   | 1   | 0  | 2020/01/25-2020/02/22 |
| 32 |               |           |       |      |                                   |          |      |      |     |    |                       |
| 33 | Yao XY(117)   | Baotou    | China | 7    | Median: 51y (36-68)               | General  | 0.43 | 7    | 1   | 1  | 2020/02/01-2020/02/08 |
| 34 | Ye XX (118)   | Yongjia   | China | 17   | Median: 48.8y (31-87)             | General  | 0.65 | 14   | 2   | 0  | 2020/01/24-2020/02/09 |
| 35 | Ye Y(119)     | Henan     | China | 1272 | NA                                | General  | NA   | 1272 | 113 | 0  | till 2020/03/09       |
| 36 | Yu FT(120)    | Beijing   | China | 127  | Median: 40y (0.5-92y)             | General  | 0.50 | 77   | 2   | 0  | 2020/02/05-2020/02/19 |
| 37 |               |           |       |      |                                   |          |      |      |     |    |                       |
| 38 | Yu JX(121)    | Hangzhou  | China | 87   | Mean: 42.89y (±17.02; range:4-88) | General  | 0.46 | 87   | 2   | 0  | 2020/1/21-2020/2/12   |
| 39 |               |           |       |      |                                   |          |      |      |     |    |                       |
| 40 |               |           |       |      |                                   |          |      |      |     |    |                       |
| 41 |               |           |       |      |                                   |          |      |      |     |    |                       |
| 42 |               |           |       |      |                                   |          |      |      |     |    |                       |
| 43 |               |           |       |      |                                   |          |      |      |     |    |                       |
| 44 |               |           |       |      |                                   |          |      |      |     |    |                       |
| 45 |               |           |       |      |                                   |          |      |      |     |    |                       |
| 46 |               |           |       |      |                                   |          |      |      |     |    |                       |

|    |                   |                            |       |       |                         |          |      |     |    |    |                       |
|----|-------------------|----------------------------|-------|-------|-------------------------|----------|------|-----|----|----|-----------------------|
| 1  |                   |                            |       |       |                         |          |      |     |    |    |                       |
| 2  |                   |                            |       |       |                         |          |      |     |    |    |                       |
| 3  |                   |                            |       |       |                         |          |      |     |    |    |                       |
| 4  |                   |                            |       |       |                         |          |      |     |    |    |                       |
| 5  | Yu X(122)         | Guangxi                    | China | 108   | Median: 41y (0.25-85)   | General  | 0.40 | 108 | 3  | 0  | 2020/02/06-2020/04/16 |
| 6  | Yuan L(123)       | Wuhan                      | China | 28    | Mean: 29.75 (±3.5) )    | Pregnant | 0.00 | 28  | 15 | 0  | 2020/01/30-2020/03/14 |
| 7  | Zeng J(124)       | Sichuan                    | China | 24184 | NA                      | General  | NA   | 226 | 1  | 0  | NA                    |
| 8  | Zeng WZ(125)      | Yongzhou                   | China | 44    | Mean: 39.1y (±14.5) )   | General  | 0.64 | 44  | 6  | 0  | 2020/01/21-2020/03/05 |
| 9  | Zhai HL(126)      | Fuyang                     | China | 11    | Mean: 11.76y (0.33-17)  | General  | 0.64 | 11  | 1  | 0  | 2020/01/22-2020/02/24 |
| 10 | Zhan H(127)       | Shiyan                     | China | 6     | Median: 8.5y (0.5-11) ) | General  | 0.50 | 6   | 1  | 0  | 2020/2/1              |
| 11 | Zhang JJ(128)     | Beijing                    | China | 5     | NA                      | General  | NA   | 5   | 1  | 0  | 2020/01/24-2020/02/29 |
| 12 | Zhang KY(129)     | Kunming                    | China | 11    | Mean: 42y (8-67)        | General  | 0.45 | 11  | 3  | 0  | 2020/01/26-2020/02/20 |
| 13 | Zhang R(130)      | Liaoning                   | China | 2784  | NA                      | General  | 0.49 | 67  | 9  | 0  | 2020/01/22-2020/02/29 |
| 14 | Zhang YC(131)     | Nanjing, Xuzhou            | China | 21    | Median:25y (10-61)      | General  | 0.60 | 21  | 5  | 0  | 2020/01/25-2020/03/18 |
| 15 | Zhang YD(132)     | Qinghai                    | China | 18    | Range: 7y-47y           | General  | 0.67 | 18  | 7  | 6  | 2020/01/24-2020/02/05 |
| 16 | Zhao L(133)       | Shijiazhuang               | China | 30    | NA                      | General  | 0.63 | 30  | 9  | 0  | 2020/01/21-2020/02-25 |
| 17 | Zhong ZM(134)     | Wuhan, Nanning,<br>Liuzhou | China | 193   | Mean: 48.1y (3-95)      | General  | 0.58 | 193 | 46 | 0  | 2020/01/03-2020/03/04 |
| 18 | Zhou H(135)       | Qujing                     | China | 13    | Mean: 28y (11.83)       | General  | 0.46 | 13  | 2  | 0  | 2020/01/23-2020/02/27 |
| 19 | Zhu SQ(136)       | Shenzhen                   | China | 417   | Mean: 45.3y (1-86)      | General  | 0.47 | 417 | 11 | 11 | 2020/01/01-2020/02/14 |
| 20 | NA, not available |                            |       |       |                         |          |      |     |    |    |                       |
| 21 |                   |                            |       |       |                         |          |      |     |    |    |                       |
| 22 |                   |                            |       |       |                         |          |      |     |    |    |                       |
| 23 |                   |                            |       |       |                         |          |      |     |    |    |                       |
| 24 |                   |                            |       |       |                         |          |      |     |    |    |                       |
| 25 |                   |                            |       |       |                         |          |      |     |    |    |                       |
| 26 |                   |                            |       |       |                         |          |      |     |    |    |                       |
| 27 |                   |                            |       |       |                         |          |      |     |    |    |                       |
| 28 |                   |                            |       |       |                         |          |      |     |    |    |                       |
| 29 |                   |                            |       |       |                         |          |      |     |    |    |                       |
| 30 |                   |                            |       |       |                         |          |      |     |    |    |                       |
| 31 |                   |                            |       |       |                         |          |      |     |    |    |                       |
| 32 |                   |                            |       |       |                         |          |      |     |    |    |                       |
| 33 |                   |                            |       |       |                         |          |      |     |    |    |                       |
| 34 |                   |                            |       |       |                         |          |      |     |    |    |                       |
| 35 |                   |                            |       |       |                         |          |      |     |    |    |                       |
| 36 |                   |                            |       |       |                         |          |      |     |    |    |                       |
| 37 |                   |                            |       |       |                         |          |      |     |    |    |                       |
| 38 |                   |                            |       |       |                         |          |      |     |    |    |                       |
| 39 |                   |                            |       |       |                         |          |      |     |    |    |                       |
| 40 |                   |                            |       |       |                         |          |      |     |    |    |                       |
| 41 |                   |                            |       |       |                         |          |      |     |    |    |                       |
| 42 |                   |                            |       |       |                         |          |      |     |    |    |                       |
| 43 |                   |                            |       |       |                         |          |      |     |    |    |                       |
| 44 |                   |                            |       |       |                         |          |      |     |    |    |                       |
| 45 |                   |                            |       |       |                         |          |      |     |    |    |                       |
| 46 |                   |                            |       |       |                         |          |      |     |    |    |                       |



## References:

1. Dora AV, Winnett A, Jatt LP, Davar K, Watanabe M, Sohn L, et al. Universal and serial laboratory testing for SARS-CoV-2 at a long-term care skilled nursing facility for veterans—Los Angeles, California, 2020. *Morbidity and Mortality Weekly Report*. 2020;69(21):651.
2. An YH, Rong DD, Shan Y, CX W. Comparison of chest radiograph images between suspected and confirmed cases of COVID-19. *Journal of Capital Medical University*. 2020;41 (4):608-12.
3. Arima Y, Kutsuna S, Shimada T, Suzuki M, Suzuki T, Kobayashi Y, et al. Severe acute respiratory syndrome coronavirus 2 infection among returnees to Japan from Wuhan, China, 2020. *Emerging infectious diseases*. 2020;26(7):1596.
4. Backer JA, Klinkenberg D, Wallinga J. Incubation period of 2019 novel coronavirus (2019-nCoV) infections among travellers from Wuhan, China, 20–28 January 2020. *Eurosurveillance*. 2020;25(5):2000062.
5. Bai M, Liu XQ, WQ W. Clinical characteristics of 472 cases of novel coronavirus pneumonia in Wuhan Jiangnan Makeshift (Fangcang) Hospital. *Clinical Focus*. 2020;35 (4):297-301.
6. Bai R, Ji ZH, Zhang H, ZH J. Analysis on the epidemiological characteristics of an outbreak of coronavirus disease 2019 (COVID – 19) in Xi'an. *Zhonghua Jibing Kongzhi Zazhi*. 2020;24 (5):567-72.
7. Bai SL, Wang JY, Zhou YQ, DS Y. Analysis of the first cluster of cases in a family of novel coronavirus pneumonia in Gansu Province. *Chines Medical association*. 2020.
8. Bin YF, Ji P, Liang XD, GN L. Clinical characteristics of 55 hospitalized patients with COVID-19 in Wuhan, China. *Journal of Guangxi Medical Univeristy*. 2020;37 (2):338-42.
9. Böhmer MM, Buchholz U, Corman VM, Hoch M, Katz K, Marosevic DV, et al. Investigation of a COVID-19 outbreak in Germany resulting from a single travel-associated primary case: a case series. *The Lancet Infectious Diseases*. 2020.
10. Cao JM, Wang WC, Chen TW, YP W. Comparative study on CT manifestation in COVID-19 between imported patients and teh second-generation cases. *Medical Journal West China*. 2020;32 (5):628-32.
11. Felice C, Di Tanna GL, Zanus G, Grossi U. Impact of COVID-19 outbreak on healthcare workers in italy: results from a national E-survey. *Journal of Community Health*. 2020:1-9.
12. Chan JF-W, Yip CC-Y, To KK-W, Tang TH-C, Wong SC-Y, Leung K-H, et al. Improved molecular diagnosis of COVID-19 by the novel, highly sensitive and specific COVID-19-RdRp/Hel real-time reverse transcription-PCR assay validated in vitro and with clinical specimens. *Journal of Clinical Microbiology*. 2020;58(5).
13. Chen B, XL. Z, Chen Y, J F. Epidemioligical and Clinical Charactertictis of COVID-19 in 69 Patients in Hainan Province. *Journal of Nanchang University* 2020;60 (2):1-6.
14. Chen J, Wang XF, PF Z. Asymptomatic SARS-CoV-2 infection in children: a clinical analysis of 20 cases. *Chinese Journal of Contemporary Pediatrics* 2020;22 (5):414-8.
15. Chen T, Jiang ZY, Xu W, Q Z. Clinical features and CT imaging analysis of 76 patients with Corona Virus Disease 2019. *Journal of Jinan University (Natural Science & Medicine Edition)*. 2020;41 (2):157-62.
16. Chen Y, Wang AH, Ding KQ, Wang HB, JM W. The epidemiological characteristics of infection in close contacts of COVID-19 in Ningbo City. *Chinese Journal of Epidemiology*. 2020;41 (5):668-72.
17. Chen YJ, Shui LL, Pang XH, HM M. Clinical features of coronavirus disease 2019 in Northeast area of Chongqing: analysis of 143 cases. *Acta Academiae Medicinae Militaris Tertiae*. 2020;42

- (6):549-54.
18. Cheng ZL, Li Y, Duan YH, H G. A preliminary study on the dynamic imaging of chest high resolution CT in patients with mild COVID-19. *Chinese Journal of Radiology*. 2020;54 (6):548-51.
  19. Team C-NIRS. COVID-19, Australia: *Epidemiology Report 7: Reporting week ending 19:00 AEDT 14 March 2020*. 2020.
  20. Ding Y, Huang ZF, Zhao SC, X L. Clinical and imaging characteristics of corona virus disease 2019 (COVID-2019). *Radiol Practice*. 2020;35 (2):281-5.
  21. Dong X, Cao Yy, Lu Xx, Zhang Jj, Du H, Yan Yq, et al. Eleven faces of coronavirus disease 2019. *Allergy*. 2020.
  22. Dong XC, Li JM, Bai JY, ZQ L. Epidemiological characteristics of confirmed COVID-19 cases in Tianjin. *Chinese Journal of Epidemiology* 2020;41 (5):638-42.
  23. Dong YY, Fan QD, Wang YP, YL L. Analysis in nucleic acid test results of patients with coronavirus disease 2019 in Yangzhou City of Jiangsu Province. *Journal of Clinical in Practice*. 2020;24 (5):6-9.
  24. Feng XP, Shi J, LJ Z. An analysis of 52 cases with coronavirus disease 2019 in Jiangling District, Jingzhou. *Jiangsu Medical Journal* 2020;46 (5):442-4.
  25. Gao T, He XP, Su HS, HB Z. Clinical characteristics of COVID-19: an analysis of 11 cases. *China Journal of Clinical Infectious Disease*. 2020;13 (1):25-8.
  26. Gautret P, Lagier J-C, Parola P, Meddeb L, Mailhe M, Doudier B, et al. Hydroxychloroquine and azithromycin as a treatment of COVID-19: results of an open-label non-randomized clinical trial. *International journal of antimicrobial agents*. 2020:105949.
  27. Kim G-u, Kim M-J, Ra SH, Lee J, Bae S, Jung J, et al. Clinical characteristics of asymptomatic and symptomatic patients with mild COVID-19. *Clinical Microbiology and Infection*. 2020.
  28. Hu SX, Xu QH, Luo KW, H Y. Epidemiological characteristics of patients with coronavirus disease 2019 in Hunan province. *Practice Prevent Medicine*. 2020;27 (4):385-8.
  29. Huang DD, Pang k, HL G. Clinical characteristics of coronavirus disease 2019 in a Chongqing hospital: analysis of 89 cases. *Journal of Third Military Medical University*. 2020;42 (9):883-6.
  30. Ji GH, Huang MH, Zhang Q, WB W. CT manifestations and dynamic changes of coronavirus disease 2019. *Chinese Journal of Medical Imaging Technology* 2020;36 (2):242-7.
  31. Jia CY, Zhao DW, Feng JL, RL L. Analysis of imaging feature and evolvement characteristic of severe COVID-19. *Beijing Medical Journal* 2020;489-492.
  32. Jiang R, Liu JX, Zhang LG, DY H. CT findings and outcome with family clustering COVID-19 in 8 families. *Electronic Journal of Emerging Infectious Diseases*. 2020;5 (2):87-90.
  33. JIn MH, Shen JY, Fu Y, Liu GT, Y L. Epidemiological characteristics of coronavirus disease 2019 in Huzhou. *Preventive Medicine*. 2020;32 (5):433-6.
  34. Kang M, Wu J, Ma W, He J, Lu J, Liu T, et al. Evidence and characteristics of human-to-human transmission of 2019-nCoV. *medRxiv*. 2020.
  35. Bai K, Liu W, Liu C, Fu Y, Hu J, Qin Y, et al. Clinical Analysis of 25 COVID-19 Infections in Children. *The Pediatric Infectious Disease Journal*. 2020;39(7): e100-e3.
  36. Ki M. Epidemiologic characteristics of early cases with 2019 novel coronavirus (2019-nCoV) disease in Korea. *Epidemiology and health*. 2020;42.
  37. Lai X, Wang M, Qin C, Tan L, Ran L, Chen D, et al. Coronavirus disease 2019 (COVID-2019) infection among health care workers and implications for prevention measures in a tertiary hospital in Wuhan, China. *JAMA Network Open*. 2020;3(5): e209666-e.

- 1  
2  
3  
4  
5  
6  
7  
8  
9  
10  
11  
12  
13  
14  
15  
16  
17  
18  
19  
20  
21  
22  
23  
24  
25  
26  
27  
28  
29  
30  
31  
32  
33  
34  
35  
36  
37  
38  
39  
40  
41  
42  
43  
44  
45  
46  
47  
48  
49  
50  
51  
52  
53  
54  
55  
56  
57  
58  
59  
60
38. Le TQM, Takemura T, Moi ML, Nabeshima T, Nguyen LKH, Hoang VMP, et al. Severe acute respiratory syndrome coronavirus 2 shedding by travelers, Vietnam, 2020. *Emerging infectious diseases*. 2020;26(7):1624.
  39. Lei MY, Huang Y, Gou Y, KK P. Characteristics of cluster epidemic of 2019 novel coronavirus disease in Guizhou province. *China Journal of Public Health*. 2020;36 (4):493-7.
  40. Lin C, Xiang J, Yan M, Li H, Huang S, Shen C. Comparison of throat swabs and sputum specimens for viral nucleic acid detection in 52 cases of novel coronavirus (SARS-Cov-2)-infected pneumonia (COVID-19). *Clinical Chemistry and Laboratory Medicine (CCLM)*. 2020;1(ahead-of-print).
  41. Li W, Cui H, Li K, Fang Y, Li S. Chest computed tomography in children with COVID-19 respiratory infection. *Pediatric radiology*. 2020:1-4.
  42. Padoan A, Cosma C, Sciacovelli L, Faggian D, Plebani M. Analytical performances of a chemiluminescence immunoassay for SARS-CoV-2 IgM/IgG and antibody kinetics. *Clinical Chemistry & Laboratory Medicine*. 2020;58(7):1081-8.
  43. Li Y, Deng W, Xiong H, Li H, Chen Z, Nie Y, et al. Immune-related factors associated with pneumonia in 127 children with coronavirus disease 2019 in Wuhan. *Pediatric Pulmonology*. 2020;55(9):2354-60.
  44. Liao XN, Zhou J, Cao J, GH L. Chest CT features comparison between COVID-19 and bacterial pneumonia. *Medical Journal of Wuhan University*. 2020;41 (3).
  45. Lin ZF, Shao YF, QP P. Clinical Analysis of 2019 Novel Coronavirus Disease in 205 Cases. *Chinese Journal of Dialysis and Artificial Organs*. 2020;31 (1):6-9.
  46. Liu B, Yang Q, Zhao L, Xie W, Si X. Epidemiological characteristics of COVID-19 patients in convalescence period. *Epidemiology & Infection*. 2020:1-31.
  47. Liu BY, Qi XH, M J. Epidemiological characteristics of imported COVID-19 cases from abroad to Zhejiang Province. *Preventive Medicine*. 2020;32 (6):550-4.
  48. Liu D, Li L, Wu X, Zheng D, Wang J, Yang L, et al. Pregnancy and perinatal outcomes of women with coronavirus disease (COVID-19) pneumonia: a preliminary analysis. *American journal of roentgenology*. 2020:1-6.
  49. Liu F, Xu A, Zhang Y, Xuan W, Yan T, Pan K, et al. Patients of COVID-19 may benefit from sustained lopinavir-combined regimen and the increase of eosinophil may predict the outcome of COVID-19 progression. *International Journal of Infectious Diseases*. 2020.
  50. Liu F, Lan WS, Gan Q, YP W. Clinical and CT features of coronavirus disease in pregnant women. *Radiologic Practice* 2020;35 (4):417-20.
  51. Liu GT, Wagn XL, Lu JR, X Z. Analysis of the characteristics of the novel coronavirus pneumonia in Ningxia. *Journal of Ningxia Medical University*. 2020;42 (2):109-13.
  52. Liu M, Song Z, Xiao K. High-resolution computed tomography manifestations of 5 pediatric patients with 2019 novel coronavirus. *Journal of computer assisted tomography*. 2020.
  53. Liu X, Liu F, Fan Q, Zheng W, DH Z. Report of COVID-19 family clustering epidemic caused by asymptomatic infection. *Chinese Journal of Public Health*. 2020;36 (3):282-4.
  54. Liu Y, Chen H, Tang K, Guo Y. Clinical manifestations and outcome of SARS-CoV-2 infection during pregnancy. *The Journal of infection*. 2020.
  55. Liu Y, Yang Y, Zhang C, Huang F, Wang F, Yuan J, et al. Clinical and biochemical indexes from 2019-nCoV infected patients linked to viral loads and lung injury. *Science China Life Sciences*. 2020;63(3):364-74.

- 1  
2  
3 56. Liu ZR, Su B, Wu JB, Li J, QC W. Investigation and analysis of a family cluster of COVID – 19  
4 cases. *Chinese Journal of Disease Control & Prevention*. 2020;24 (5).  
5  
6 57. Lu R, Qin J, Wu Y, Wang J, Huang S, Tian L, et al. Epidemiological and clinical characteristics of  
7 COVID-19 patients in Nantong, China. *The Journal of Infection in Developing Countries*.  
8 2020;14(05):440-6.  
9  
10 58. Lu X, Zhang L, Du H, Zhang J, Li YY, Qu J, et al. SARS-CoV-2 infection in children. *New*  
11 *England Journal of Medicine*. 2020;382(17):1663-5.  
12  
13 59. Lu Y, Wen H, Rong D, Zhou Z, Liu H. Clinical characteristics and radiological features of  
14 children infected with the 2019 novel coronavirus. *Clinical Radiology*. 2020.  
15  
16 60. Rivett L, Sridhar S, Sparkes D, Routledge M, Jones NK, Forrest S, et al. Screening of healthcare  
17 workers for SARS-CoV-2 highlights the role of asymptomatic carriage in COVID-19 transmission.  
18 *Elife*. 2020;9:e58728.  
19  
20 61. Luo S, Liu W, Liu Z, Zheng X, Ling P, Ding Y, et al. Confirmed asymptomatic carrier of  
21 SARS-CoV-2.  
22  
23 62. Arons MM, Hatfield KM, Reddy SC, Kimball A, James A, Jacobs JR, et al. Presymptomatic  
24 SARS-CoV-2 infections and transmission in a skilled nursing facility. *New England journal of*  
25 *medicine*. 2020.  
26  
27 63. Mawhinney JA, Wilcock C, Haboubi H, Roshanzamir S. Neurotropism of SARS-CoV-2:  
28 COVID-19 presenting with an acute manic episode. *BMJ Case Reports*. 2020;13(6):14.  
29  
30 64. Ma YL, Xia SY, M. W, SM Z. Clinical features of children with SARS-CoV-2 infection: an  
31 analysis of 115 cases. *Chinese Journal of Contemporary Pediatrics*. 2020;22 (4):290-3.  
32  
33 65. MacIntyre CR. On a knife's edge of a COVID-19 pandemic: is containment still possible. *Public*  
34 *Health Res Pract*. 2020;30(1):3012000.  
35  
36 66. Martin C, Montesinos I, Dauby N, Gilles C, Dahma H, Van Den Wijngaert S, et al. Dynamics of  
37 SARS-CoV-2 RT-PCR positivity and seroprevalence among high-risk healthcare workers and hospital  
38 staff. *Journal of Hospital Infection*. 2020;106(1):102-6.  
39  
40 67. McMichael TM, Currie DW, Clark S, Pogosjans S, Kay M, Schwartz NG, et al. Epidemiology of  
41 Covid-19 in a long-term care facility in King County, Washington. *New England Journal of Medicine*.  
42 2020;382(21):2005-11.  
43  
44 68. Bielecki M, Züst R, Siegrist D, Meyerhofer D, Cramer GAG, Stanga ZG, et al. Social distancing  
45 alters the clinical course of COVID-19 in young adults: A comparative cohort study. *Clinical Infectious*  
46 *Diseases*. 2020.  
47  
48 69. Miyamae Y, Hayashi T, Yonezawa H, Fujihara J, Matsumoto Y, Ito T, et al. Duration of viral  
49 shedding in asymptomatic or mild cases of novel coronavirus disease 2019 (COVID-19) from a cruise  
50 ship: A single-hospital experience in Tokyo, Japan. *International Journal of Infectious Diseases*. 2020;  
51 97: 293-5.  
52  
53 70. Ahmed MA, Colebunders R, Fodjo JNS. Evidence for important COVID-19 community  
54 transmission in Somalia using a clinical case definition. *International Journal of Infectious Diseases*.  
55  
56 71. Moriarty LF. Public health responses to COVID-19 outbreaks on cruise ships—worldwide,  
57 February–March 2020. *MMWR Morbidity and mortality weekly report*. 2020;69.  
58  
59 72. Korkmaz MF, Türe E, Dorum BA, Kılıç ZB. The epidemiological and clinical characteristics of  
60 81 children with COVID-19 in a pandemic hospital in Turkey: an observational cohort study. *Journal of*  
*Korean medical science*. 2020;35(25).  
73. Nagler AR, Goldberg ER, Agüero-Rosenfeld ME, Cangiarella J, Kalkut G, Monahan CR, et al.

- 1  
2  
3 Early Results from SARS-CoV-2 PCR testing of Healthcare Workers at an Academic Medical Center in  
4 New York City. *Clinical Infectious Diseases*. 2020.
- 5  
6 74. Niu YL, Wang JM, Li GL, Z T. Clinical Characteristics and Prevention of COVID-19 in Suqian.  
7 *Linchuang Yanjiu*. 2020;28 (5):1-3.
- 8  
9 75. Ou JM, Ye WJ, Zheng KC, XQ L. Epidemiological characteristics of COVID-19 in Fujian  
10 Province, China. *Chinese Journal of Zoonoses*. 2020;36 (5):366-71.
- 11  
12 76. Pan XQ, Z H. Analysis on Chinese medical clinical characteristics of 64 patients with common  
13 type COVID-19. *Journal of Wnzhou Medical University*. 2020;50 (3):187-90.
- 14  
15 77. Pongpirul WA, Mott JA, Woodring JV, Uyeki TM, MacArthur JR, Vachiraphan A, et al. Clinical  
16 characteristics of patients hospitalized with coronavirus disease, Thailand. *Emerging infectious  
17 diseases*. 2020;26(7):1580-5.
- 18  
19 78. Kim SE, Jeong HS, Yu Y, Shin SU, Kim S, Oh TH, et al. Viral kinetics of SARS-CoV-2 in  
20 asymptomatic carriers and presymptomatic patients. *International Journal of Infectious Diseases*. 2020.
- 21  
22 79. She X, Liu J, Zhao C, Y L. Treatment analysis for the first 9 cases of pneumonia infected by novel  
23 coronavirus in Suining area. Treatment analysis for the first 9 cases of pneumonia infected by novel  
24 coronavirus in Suining area. 2020;17 (2):52-5.
- 25  
26 80. Song W, Li J, Zou N, Guan W, Pan J, Xu W. Clinical features of pediatric patients with  
27 coronavirus disease (COVID-19). *Journal of Clinical Virology*. 2020:104377.
- 28  
29 81. Spiteri G, Fielding J, Diercke M, Campese C, Enouf V, Gaymard A, et al. First cases of  
30 coronavirus disease 2019 (COVID-19) in the WHO European Region, 24 January to 21 February 2020.  
31 *Eurosurveillance*. 2020;25(9):2000178.
- 32  
33 82. Sun DF, Deng M, Lu XZ, XS' X. Clinical analysis of 30 cases of new coronavirus pneumonia.  
34 *Zhejiang Clinical Medical Journal*. 2020;22 (3):354-6.
- 35  
36 83. Sun WW, Ling F, Pan JR, J C. Epidemiological characteristics of COVID-19 family clustering in  
37 Zhejiang Province. *Chinese Journal of Preventive Medicine*. 2020;54 (6):625-9.
- 38  
39 84. Sun Z, Zhang YJ, Yang J, W W. Common Novel Coronavirus Pneumonia (COVID – 19): Clinical  
40 and Imaging Features. *Hebei Medicine*. 2020;26 (6):908-12.
- 41  
42 85. Tang A, Tong ZD, Li KF, P L. Epidemiological characteristics of coronavirus disease 2019  
43 (COVID-19) cases in Zhoushan. *Preventive Medicine*. 2020;32 (2):113-6.
- 44  
45 86. Tian S, Hu N, Lou J, Chen K, Kang X, Xiang Z, et al. Characteristics of COVID-19 infection in  
46 Beijing. *Journal of Infection*. 2020.
- 47  
48 87. Judson TJ, Odisho AY, Neinstein AB, Chao J, Williams A, Miller C, et al. Rapid design and  
49 implementation of an integrated patient self-triage and self-scheduling tool for COVID-19. *Journal of  
50 the American Medical Informatics Association*. 2020;27(6):860-6.
- 51  
52 88. Tolia VM, Chan TC, Castillo EM. Preliminary results of initial testing for coronavirus  
53 (COVID-19) in the emergency department. *Western Journal of Emergency Medicine*. 2020;21(3):503.
- 54  
55 89. Tong H, Xu YY, Yang B, ZW Z. Value of HRCT in diagnosis of COVID-19. *International Journal  
56 of Medical Radiology*. 2020;43 (2):135-9.
- 57  
58 90. Tong Z-D, Tang A, Li K-F, Li P, Wang H-L, Yi J-P, et al. Potential presymptomatic transmission  
59 of SARS-CoV-2, Zhejiang province, China, 2020. *Emerging infectious diseases*. 2020;26(5):1052.
- 60  
91. Treibel TA, Manisty C, Burton M, McKnight Á, Lambourne J, Augusto JB, et al. COVID-19:  
PCR screening of asymptomatic health-care workers at London hospital. *The Lancet*.  
2020;395(10237):1608-10.
92. Wan R, Mao Z-Q, He L-Y, Hu Y-C. Evidence from two cases of asymptomatic infection with

- 1  
2  
3 SARS-CoV-2: Are 14 days of isolation sufficient? *International Journal of Infectious Diseases*. 2020;  
4 95:174-5.  
5  
6 93. AH, W, Long Q, C T. Initial symptoms and epidemiological characteristics of confirmed cases of  
7 COVID- 1 9 in the west of Chongqing. *Chinese Journal of Infect Control*. 2020;19 (3):234-8.  
8  
9 94. Deng W, Guang T-w, Yang M, Li J-r, Jiang D-p, Li C-y, et al. Positive results for patients with  
10 COVID-19 discharged form hospital in Chongqing, China. 2020.  
11  
12 95. Wang JC, Liu JP, Wang YY, W L. Dynamic changes of chest CT imaging in patients with  
13 COVID-19. *JOURNAL of Zhejiang University (Medical Science)*. 2020:191-7.  
14  
15 96. Wang KS, Ye ZH, D Z. Investigation on a cluster of coronavirus disease 2019 in Pingyang County.  
16 *Preventive Medicine*. 2020;32 (3):222-5.  
17  
18 97. Wang S, Liu XT, Qin J, SX' L. Nucleic acid screening results of 738 close contacts of coronavirus  
19 disease 2019. *Chinese Journal of Infection Control* 2020;19 (4):297-300.  
20  
21 98. Wang T, Shi L, Chen YX, Fang YK, W Y. Clinical Efficacy Analysis of 50 Cases of Corona Virus  
22 Disease 2019 in Traditional Chinese Medicine. *Jilin Journal of Chinese Medicine*. 2020;40 (3):281-5.  
23  
24 99. Wang X, Fang J, Zhu Y, Chen L, Ding F, Zhou R, et al. Clinical characteristics of non-critically ill  
25 patients with novel coronavirus infection (COVID-19) in a Fangcang Hospital. *Clinical Microbiology  
26 and Infection*. 2020.  
27  
28 100. Wong HYF, Lam HYS, Fong AH-T, Leung ST, Chin TW-Y, Lo CSY, et al. Frequency and  
29 distribution of chest radiographic findings in COVID-19 positive patients. *Radiology*. 2020:201160.  
30  
31 101. Wu GY, Lin SH, YX C. Epidemiological and clinical analysis of 104 patients with new  
32 coronavirus pneumonia. *Chinese JOURNAL of Critical Care Medicine*.13 (2) (13 (2)):124-7.  
33  
34 102. Wu HP, Li BF, Chen X, HZ H. Clinical analysis of 23 cases of COVID-19 in children under 18 in  
35 Jiangxi. *Chinese Journal of Contemporary Pediatrics* 2020;22 (5):419-24.  
36  
37 103. Wu JR, Song XB, GONG XW, CR L. Clinical analysis of 55 patients with COVID-19. *Jiangsu  
38 Medical Journal*. 2020;46 (6):546-50.  
39  
40 104. Wu XQ, Xie YL, Zhang ST, JP C. Clinical characteristics, CT findings and AI application in  
41 pregnant women with COVID-19 pneumonia. *International JOURNAL of Medical Radiology*. 2020;43  
42 (3):262-6.  
43  
44 105. Wu Y, Huang SY, Liu C, F W. Analysis of laboratory test results of 23 cases of novel coronavirus  
45 pneumonia in Nantong area. *Medical Journal of Communications*. 2020;34 (2):115-6.  
46  
47 106. Wu YL, Wei F, Li Q, QC C. The Epidemiological Characteristics of an Outbreak of 2019 Novel  
48 Coronavirus Diseases( COVID – 19) in Chegnde City. *Hebei Medicine*. 2020;26 (6):887-92.  
49  
50 107. Xiang TX, Liu JM, Xu F, N C. Analysis of clinical characteristics of 49 patients with coronavirus  
51 disease 2019 in Jiangxi. *Chinese Journal of Respiratory and Clinical Care Medicine*. 2020;19  
52 (2):154-60.  
53  
54 108. XIAO KH, LL, S, XH P. The clinical features of the 143 patients with COVID-19 in North-East  
55 of Chongqing *Acta Academiae Medicinae Militaris Tertiae* 2020;42 (6):549-54.  
56  
57 109. Xie JW, Jiang H, HL X. Analysis of the clustered epidemic situation of new coronavirus  
58 pneumonia units in 2019. 2020.  
59  
60 110. Xie YB, ChenQ, Chen W, CY X. Discussion on CT Diagnosis of 39 Cases of Novel Coronavirus  
Pneumonia. *Zhejiang Journal of Integrated Traditional Chinese and Western Medicine*. 2020;30  
(6):437-9.  
111. Xu T, Chen C, Zhu Z, Cui M, Chen C, Dai H, et al. Clinical features and dynamics of viral load in  
imported and non-imported patients with COVID-19. *International Journal of Infectious Diseases*.

2020.

112. Yang K, Xiao YL, Liu YF, Shi DY, H L. Epidemiological and clinical characteristics of coronavirus disease 2019 in non-epidemic areas: report of 57 cases. *Acta Academiae Medicinae Militaris Tertiae*. 2020;42 (6):555-9.
113. Yang R, Gui X, Xiong Y. Comparison of clinical characteristics of patients with asymptomatic vs symptomatic coronavirus disease 2019 in Wuhan, China. *JAMA Network Open*. 2020;3(5): e2010182-e.
114. Yang YL, Li LH, Li CF, YC X. A survey on clustering of novel coronavirus disease in families in Fengjie county of Chongqing municipality. *Chinese Journal of Public Health*. 2020;36 (3):285-8.
115. Yang YX, Ren CF, Wang YJ, LF Y. Clinical Features of 88 Cases with Novel Coronavirus Pneumonia. *Journal of Kunming University*. 2020;42 (2):81-3.
116. Yao QD, Zhang CB, Fu J, Y Y. HRCT feature and evolution rule of COVID - 19. *The Journal of Practical Medicine*. 2020;36 (12):1552-7.
117. Yao XY, Zhao XY, Wang ML, WH X. Familial clustering infection caused by asymptomatic COVID-19. *International Journal of Respiration*. 2020;40 (13):982-7.
118. Ye XX, Xie YB, Chen Q, Yang CY, W C. 3 CT diagnosis of clustered new coronavirus pneumonia. *Zhejiang Medical Journal*. 2020;42 (4):395-7.
119. Ye Y, Fan W, Wang WH, Wang HF, JJ P. Difference in epidemic characteristics between asymptomatic infected persons and confirmed cases in COVID-19 clustered epidemics. *Chinese Journal of Infection Control*. 2020;19 (6):492-7.
120. Yu F, Yan L, Wang N, Yang S, Wang L, Tang Y, et al. Quantitative detection and viral load analysis of SARS-CoV-2 in infected patients. *Clinical Infectious Diseases*. 2020.
121. JX Y. Epidemiological and clinical characteristics analysis of 87 patients with novel coronavirus pneumonia in Hangzhou. *Zhejiang Clinical Medical Journal*. 2020:318-24.
122. Yu X, YU Y, WH Y. Analysis of the nucleic acid detection results of 2019 Novel Coronavirus in 108 inpatients. *Chinese Journal of New Clinical Medicine*. 2020;13 (5):448-52.
123. Yuan L, Zhang J, XN D. Clinical characteristics and prognostic analysis of COVID-19 infection in 28 pregnant women. *Journal of Xinjiang Medical University*. 2020;43 (4):449-57.
124. Zeng J, Qiu LP, Y Z. Epidemiological outcome of close contacts of coronavirus disease 2019 cases in Sichuan province. *Chinese Journal of Public Health*. 2020;36 (4):503-6.
125. Zeng WZ, Liu B, JIn Y, DH Y. Clinical characteristics of 44 patients with coronavirus disease 2019 in Yongzhou. *Journal of Hainan Medical University*. 2020;26 (13):967-71.
126. Yang W, Teng XB, XH Z. Clinical analysis of 11 children with COVID-19. *Journal of Bengbu Medical College*. 2020;45 (6):708-11.
127. Zhan H, SX B. Clinical Characteristics, Diagnosis and Treatment of Novel Coronavirus Pneumonia in Children. *Journal of Hubei University of Medicine*. 2020;39 (3).
128. Zhang J, Tian S, Lou J, Chen Y. Familial cluster of COVID-19 infection from an asymptomatic. *Critical Care*. 2020; 24: 1-3.
129. Zhang KY, Zhang L, Li MW, ML Y. Clinical features comparative analysis on familial aggregation cases of imported and local corona virus disease 2019. *Chinese Journal of Integrated Traditional and Western Medicine in Intensive and Critical Care*. 2020;27 (4):385-9.
130. Zhang R, Li YX, Yu YL, X M. Infection risk and its influencing factors among close contacts of patients with novel coronavirus disease 2019 in Liaoning province. *Chinese Journal of Public Health*.

1  
2  
3 2020;36 (4):477-80.

4 131. Yongchen Z, Shen H, Wang X, Shi X, Li Y, Yan J, et al. Different longitudinal patterns of nucleic  
5 acid and serology testing results based on disease severity of COVID-19 patients. *Emerging microbes*  
6 & infections. 2020;9(1):833-6.

7  
8 132. Zhang YD, Xi AQ, Zhuo M, J D. Epidemiological characteristics and characteristics of infection  
9 of 18 confirmed cases of Coronavirus disease 2019 in Qinghai Province, China. *Chinese Journal of*  
10 *Nosocomiology*. 2020;30 (10):1475-9.

11  
12 133. Zhao L, Xue J, Wang YL, H Q. Comparative study of imported and local clinical features of  
13 COVID-19 patients in Shijiazhuang. *Shandong Medical Journal*. 2020;60 (15):10-3.

14  
15 134. Zhong ZM, Bin YF, Zhu JY, Ji P, XH Z. Coronavirus disease 2019: clinical characteristics and  
16 therapeutic effect analysis of 193 cases. *Chinese Journal OF Difficut and Complicated Cases*. 2020;19  
17 (6):559-62.

18  
19 135. Zhou H, Yuan JP, Yang GS, H S. Preliminary Study on Treatment and Diagnosis of Integrated  
20 Traditional Chinese and Western Medicine of 13 Patients with NCP in Qujing Area. *Chinese Journal of*  
21 *Ethnomedicine and Ethnopharmacy*. 2020;29 (5):55-8.

22  
23 136. Zhu SQ, Fan Z, Y Y. Epidemiological features of COVID-19 in Shenzhen city based on network  
24 resources. *Chinese Journal of Hygiene Rescue*. 2020;6 (3):148-54.  
25  
26  
27  
28  
29  
30  
31  
32  
33  
34  
35  
36  
37  
38  
39  
40  
41  
42  
43  
44  
45  
46  
47  
48  
49  
50  
51  
52  
53  
54  
55  
56  
57  
58  
59  
60



1  
2  
3  
4  
5  
6  
7  
8  
9  
10  
11  
12  
13  
14  
15  
16  
17  
18  
19  
20  
21  
22  
23  
24  
25  
26  
27  
28  
29  
30  
31  
32  
33  
34  
35  
36  
37  
38  
39  
40  
41  
42  
43  
44  
45  
46

**Supplementary Table 3 Quality assessment of selected articles**

|                                                      | Introduction |   |   |   | Methods |   |   |   |    |    |    |    | Results |    |    |    | Discussion |    | Other |    |
|------------------------------------------------------|--------------|---|---|---|---------|---|---|---|----|----|----|----|---------|----|----|----|------------|----|-------|----|
|                                                      | 1            | 2 | 3 | 4 | 5       | 6 | 7 | 8 | 9  | 10 | 11 | 12 | 13      | 14 | 15 | 16 | 17         | 18 | 19    | 20 |
| Amy V. Dora                                          | Y            | Y | N | Y | Y       | Y | Y | Y | Y  | N  | Y  | Y  | Y       | Y  | NM | Y  | Y          | Y  | N     | NM |
| An YH                                                | Y            | Y | N | Y | Y       | Y | Y | Y | Y  | Y  | Y  | Y  | Y       | Y  | Y  | Y  | Y          | N  | NM    | NM |
| Arima                                                | Y            | Y | N | Y | Y       | Y | Y | Y | Y  | N  | Y  | Y  | Y       | Y  | NM | Y  | Y          | Y  | NM    | Y  |
| Backer JA                                            | Y            | Y | N | Y | Y       | Y | Y | Y | Y  | Y  | Y  | Y  | Y       | Y  | NM | Y  | Y          | N  | N     | NM |
| Bai M                                                | Y            | Y | N | Y | Y       | Y | Y | Y | Y  | Y  | Y  | Y  | Y       | Y  | Y  | Y  | Y          | N  | NM    | NM |
| Bai R                                                | Y            | Y | N | Y | Y       | Y | Y | Y | Y  | N  | Y  | Y  | Y       | Y  | NM | Y  | Y          | N  | N     | NM |
| Bai SL                                               | Y            | Y | N | Y | Y       | Y | Y | Y | Y  | N  | Y  | Y  | Y       | Y  | NM | Y  | Y          | N  | N     | NM |
| Bin YF                                               | Y            | Y | N | Y | Y       | Y | Y | Y | NM | Y  | Y  | Y  | Y       | Y  | NM | Y  | Y          | N  | NM    | NM |
| Böhmer MM                                            | Y            | Y | N | Y | Y       | Y | Y | Y | NM | Y  | Y  | Y  | Y       | Y  | Y  | Y  | Y          | Y  | NM    | NM |
| Cao JM                                               | Y            | Y | N | Y | Y       | Y | Y | Y | Y  | N  | Y  | Y  | Y       | Y  | Y  | Y  | Y          | N  | NM    | NM |
| Carla Felice                                         | Y            | Y | N | Y | Y       | Y | Y | Y | NM | Y  | Y  | Y  | Y       | Y  | NM | Y  | Y          | Y  | N     | Y  |
| Chan JFW                                             | Y            | Y | N | Y | Y       | Y | Y | Y | NM | Y  | Y  | Y  | Y       | Y  | NM | Y  | Y          | Y  | N     | NM |
| Chen B                                               | Y            | Y | N | Y | Y       | Y | Y | Y | Y  | N  | Y  | Y  | Y       | Y  | Y  | Y  | Y          | N  | NM    | NM |
| Chen J                                               | Y            | Y | N | Y | Y       | Y | Y | Y | Y  | Y  | Y  | Y  | Y       | Y  | Y  | Y  | Y          | Y  | N     | Y  |
| Chen T                                               | Y            | Y | N | Y | Y       | Y | Y | Y | Y  | N  | Y  | Y  | Y       | Y  | NM | Y  | Y          | N  | NM    | NM |
| Chen Y                                               | Y            | Y | N | Y | Y       | Y | Y | Y | NM | Y  | Y  | Y  | Y       | Y  | NM | Y  | Y          | N  | N     | Y  |
| Chen YJ                                              | Y            | Y | N | Y | Y       | Y | Y | Y | Y  | Y  | Y  | Y  | Y       | Y  | NM | Y  | Y          | Y  | NM    | NM |
| Cheng ZP                                             | Y            | Y | N | Y | Y       | Y | Y | Y | Y  | Y  | N  | Y  | Y       | Y  | NM | Y  | Y          | Y  | N     | Y  |
| COVID-19 National Incident Room<br>Surveillance Team | NM           | Y | N | Y | Y       | Y | Y | Y | NM | N  | Y  | Y  | Y       | Y  | NM | Y  | N          | N  | NM    | NM |
| Ding Y                                               | Y            | Y | N | Y | Y       | Y | Y | Y | Y  | N  | Y  | Y  | Y       | Y  | NM | Y  | Y          | N  | NM    | NM |
| Dong X                                               | Y            | Y | N | Y | Y       | Y | Y | Y | Y  | N  | Y  | Y  | Y       | Y  | NM | Y  | Y          | N  | NM    | NM |

1  
2  
3  
4  
5  
6  
7  
8  
9  
10  
11  
12  
13  
14  
15  
16  
17  
18  
19  
20  
21  
22  
23  
24  
25  
26  
27  
28  
29  
30  
31  
32  
33  
34  
35  
36  
37  
38  
39  
40  
41  
42  
43  
44  
45  
46

|           |   |   |   |   |   |   |   |   |    |   |   |   |   |   |    |   |   |   |    |    |    |
|-----------|---|---|---|---|---|---|---|---|----|---|---|---|---|---|----|---|---|---|----|----|----|
| Dong XC   | Y | Y | N | Y | Y | Y | Y | Y | Y  | Y | Y | Y | Y | Y | NM | Y | Y | N | N  | NM |    |
| Dong YY   | Y | Y | N | Y | Y | Y | Y | Y | Y  | Y | Y | Y | Y | Y | Y  | Y | Y | Y | Y  | NM | NM |
| Feng XP   | Y | Y | N | Y | Y | Y | Y | Y | Y  | Y | Y | Y | Y | Y | NM | Y | Y | Y | NM | Y  |    |
| Gao T     | Y | Y | N | Y | Y | Y | Y | Y | Y  | Y | Y | Y | Y | Y | NM | Y | Y | N | NM | NM |    |
| Gautret P | Y | Y | N | Y | Y | Y | Y | Y | Y  | Y | Y | Y | Y | Y | Y  | Y | Y | Y | N  | Y  |    |
| G-u. Kim  | Y | Y | N | Y | Y | Y | Y | Y | Y  | N | Y | Y | Y | Y | NM | Y | Y | Y | N  | NM |    |
| Hu SX     | Y | Y | N | Y | Y | Y | Y | Y | Y  | Y | Y | Y | Y | Y | NM | Y | Y | Y | NM | NM |    |
| Huang DD  | Y | Y | N | Y | Y | Y | Y | Y | Y  | Y | Y | Y | Y | Y | NM | Y | Y | N | NM | NM |    |
| Ji GH     | Y | Y | N | Y | Y | Y | Y | Y | Y  | N | Y | Y | Y | Y | NM | Y | Y | N | NM | NM |    |
| Jia CY    | Y | Y | N | Y | Y | Y | Y | Y | Y  | Y | Y | Y | Y | Y | NM | Y | Y | N | NM | NM |    |
| Jiang R   | Y | Y | N | Y | Y | Y | Y | Y | Y  | N | Y | Y | Y | Y | Y  | Y | Y | N | NM | NM |    |
| Jin MH    | Y | Y | N | Y | Y | Y | Y | Y | Y  | N | Y | Y | Y | Y | NM | Y | Y | N | NM | NM |    |
| Kang M    | Y | Y | N | Y | Y | Y | Y | Y | Y  | Y | Y | Y | Y | Y | Y  | Y | Y | N | NM | Y  |    |
| Ke B      | Y | Y | N | Y | Y | Y | Y | Y | Y  | Y | Y | Y | Y | Y | NM | Y | Y | Y | N  | NM |    |
| Ki M      | Y | Y | N | Y | Y | Y | Y | Y | NM | Y | Y | Y | Y | Y | NM | Y | Y | N | N  | Y  |    |
| Lai XQ    | Y | Y | N | Y | Y | Y | Y | Y | NM | Y | Y | Y | Y | Y | NM | Y | Y | Y | N  | Y  |    |
| Le TQM    | Y | Y | N | Y | Y | Y | Y | Y | Y  | N | Y | Y | Y | Y | NM | Y | Y | N | NM | NM |    |
| Lei MY    | Y | Y | N | Y | Y | Y | Y | Y | Y  | N | Y | Y | Y | Y | NM | Y | Y | N | NM | NM |    |
| Li CY     | Y | Y | N | Y | Y | Y | Y | Y | Y  | N | Y | Y | Y | Y | NM | Y | N | N | NM | NM |    |
| Li W      | Y | Y | N | Y | Y | Y | Y | Y | Y  | N | Y | Y | Y | Y | NM | Y | Y | N | N  | Y  |    |
| Li Y      | Y | Y | N | Y | Y | Y | Y | Y | Y  | N | Y | Y | Y | Y | NM | Y | Y | N | NM | Y  |    |
| Li Y      | Y | Y | N | Y | Y | Y | Y | Y | Y  | Y | Y | Y | Y | Y | NM | Y | Y | Y | N  | Y  |    |
| Liao XN   | Y | Y | N | Y | Y | Y | Y | Y | Y  | Y | Y | Y | Y | Y | NM | Y | Y | N | NM | NM |    |
| Lin ZF    | Y | Y | N | Y | Y | Y | Y | Y | Y  | Y | Y | Y | Y | Y | NM | Y | Y | Y | NM | NM |    |
| Liu BM    | Y | Y | N | Y | Y | Y | Y | Y | Y  | Y | Y | Y | Y | Y | NM | Y | Y | N | N  | Y  |    |

1  
2  
3  
4  
5  
6  
7  
8  
9  
10  
11  
12  
13  
14  
15  
16  
17  
18  
19  
20  
21  
22  
23  
24  
25  
26  
27  
28  
29  
30  
31  
32  
33  
34  
35  
36  
37  
38  
39  
40  
41  
42  
43  
44  
45  
46

|                            |   |   |   |   |   |   |   |   |    |   |   |   |    |    |    |   |   |    |    |    |
|----------------------------|---|---|---|---|---|---|---|---|----|---|---|---|----|----|----|---|---|----|----|----|
| Liu BY                     | Y | Y | N | Y | Y | Y | Y | Y | Y  | N | Y | Y | Y  | Y  | NM | Y | Y | N  | NM | NM |
| Liu DH                     | Y | Y | N | Y | Y | Y | Y | Y | Y  | N | Y | Y | Y  | Y  | NM | Y | Y | Y  | NM | Y  |
| Liu F                      | Y | Y | N | Y | Y | Y | Y | Y | Y  | Y | Y | Y | Y  | Y  | Y  | Y | Y | Y  | N  | Y  |
| Liu F                      | Y | Y | N | Y | Y | Y | Y | Y | Y  | N | Y | Y | Y  | Y  | NM | Y | Y | N  | NM | Y  |
| Liu GT                     | Y | Y | N | Y | Y | Y | Y | Y | Y  | Y | Y | Y | Y  | Y  | NM | Y | Y | Y  | NM | Y  |
| Liu MQ                     | Y | Y | N | Y | Y | Y | Y | Y | Y  | N | Y | Y | Y  | Y  | Y  | Y | N | N  | N  | NM |
| Liu X                      | Y | Y | N | Y | Y | Y | Y | Y | Y  | N | Y | Y | Y  | Y  | NM | Y | Y | N  | NM | NM |
| Liu YL                     | Y | Y | N | Y | Y | Y | Y | Y | Y  | N | Y | Y | Y  | Y  | NM | Y | Y | N  | N  | NM |
| Liu YX                     | Y | Y | N | Y | Y | Y | Y | Y | Y  | Y | Y | Y | Y  | Y  | Y  | Y | Y | N  | N  | Y  |
| Liu ZR                     | Y | Y | N | Y | Y | Y | Y | Y | Y  | N | Y | Y | Y  | Y  | NM | Y | Y | Y  | N  | NM |
| Lu RF                      | Y | Y | N | Y | Y | Y | Y | Y | Y  | N | Y | Y | Y  | Y  | NM | Y | Y | Y  | N  | Y  |
| Lu XX                      | Y | Y | N | Y | Y | Y | Y | Y | Y  | N | Y | Y | Y  | Y  | NM | Y | N | N  | NM | NM |
| Lu Y                       | Y | Y | N | Y | Y | Y | Y | Y | NM | N | Y | Y | Y  | Y  | NM | Y | Y | Y  | N  | Y  |
| Lucy Rivett                | Y | Y | N | Y | Y | Y | Y | Y | Y  | Y | Y | Y | Y  | Y  | NM | Y | Y | Y  | N  | Y  |
| Luo SH                     | Y | Y | N | Y | Y | Y | Y | N | Y  | N | Y | Y | Y  | Y  | Y  | Y | N | N  | N  | Y  |
| M.M. Arons                 | Y | Y | N | Y | Y | Y | Y | Y | Y  | N | Y | Y | Y  | Y  | NM | Y | Y | Y  | NM | NM |
| Ma Y                       | Y | Y | N | Y | Y | Y | Y | Y | Y  | Y | Y | Y | Y  | Y  | NM | Y | Y | Y  | N  | Y  |
| Ma YL                      | Y | Y | N | Y | Y | Y | Y | Y | Y  | Y | Y | Y | Y  | Y  | NM | Y | Y | N  | NM | NM |
| MacIntyre CR               | Y | Y | N | Y | Y | Y | Y | N | Y  | N | Y | Y | Y  | Y  | NM | Y | N | N  | N  | NM |
| Martin C(Charlotte Martin) | Y | Y | N | Y | Y | Y | Y | Y | Y  | N | Y | Y | Y  | Y  | NM | Y | Y | Y  | NM | Y  |
| McMichael TM               | Y | Y | N | Y | Y | Y | Y | Y | Y  | N | Y | Y | Y  | Y  | NM | Y | Y | Y  | NM | NM |
| Michel Bielecki            | Y | Y | N | Y | Y | Y | Y | Y | Y  | N | Y | Y | Y  | Y  | NM | Y | Y | Y  | N  | Y  |
| Miyamae Y                  | Y | Y | N | Y | Y | Y | Y | Y | Y  | N | Y | Y | Y  | Y  | NM | Y | Y | N  | N  | Y  |
| Mohammed A M Ahmed         | Y | Y | N | Y | Y | Y | Y | Y | NM | Y | Y | Y | NM | NM | NM | Y | Y | Y  | N  | Y  |
| Moriarty LF                | Y | Y | N | Y | Y | Y | Y | Y | Y  | N | Y | Y | Y  | Y  | NM | Y | Y | NM | N  | NM |

1  
2  
3  
4  
5  
6  
7  
8  
9  
10  
11  
12  
13  
14  
15  
16  
17  
18  
19  
20  
21  
22  
23  
24  
25  
26  
27  
28  
29  
30  
31  
32  
33  
34  
35  
36  
37  
38  
39  
40  
41  
42  
43  
44  
45  
46

|                         |   |   |   |   |   |   |   |   |    |   |   |   |   |   |    |   |   |    |    |    |
|-------------------------|---|---|---|---|---|---|---|---|----|---|---|---|---|---|----|---|---|----|----|----|
| Muhammet Furkan Korkmaz | Y | Y | N | Y | Y | Y | Y | Y | Y  | Y | Y | Y | Y | Y | NM | Y | Y | Y  | N  | Y  |
| Nagler AR               | Y | Y | N | Y | Y | Y | Y | Y | Y  | N | Y | Y | Y | Y | NM | Y | Y | N  | N  | NM |
| Niu YL                  | Y | Y | N | Y | Y | Y | Y | Y | Y  | N | Y | Y | Y | Y | Y  | Y | Y | N  | NM | NM |
| Ou JM                   | Y | Y | N | Y | Y | Y | Y | Y | Y  | N | Y | Y | Y | Y | NM | Y | Y | N  | N  | NM |
| Pan XQ                  | Y | Y | N | Y | Y | Y | Y | Y | Y  | N | Y | Y | Y | Y | NM | Y | Y | N  | NM | Y  |
| Pongpirul WA            | Y | Y | N | Y | Y | Y | Y | Y | Y  | Y | Y | Y | Y | Y | Y  | Y | Y | Y  | N  | Y  |
| Seong Eun Kim           | Y | Y | N | Y | Y | Y | Y | Y | Y  | N | Y | Y | Y | Y | NM | Y | Y | N  | N  | Y  |
| She X                   | Y | Y | N | Y | Y | Y | Y | Y | Y  | N | Y | Y | Y | Y | Y  | Y | Y | N  | NM | NM |
| Song W                  | Y | Y | N | Y | Y | Y | Y | Y | Y  | N | Y | Y | Y | Y | NM | Y | Y | Y  | N  | NM |
| Spiteri G               | Y | Y | N | Y | Y | Y | Y | Y | Y  | Y | Y | Y | Y | Y | NM | Y | Y | N  | N  | NM |
| Sun DF                  | Y | Y | N | Y | Y | Y | Y | Y | Y  | N | Y | Y | Y | Y | NM | Y | Y | N  | NM | NM |
| Sun WW                  | Y | Y | N | Y | Y | Y | Y | N | Y  | Y | Y | Y | Y | Y | NM | Y | Y | NM | NM | NM |
| Sun Z                   | Y | Y | N | Y | Y | Y | Y | Y | Y  | Y | Y | Y | Y | Y | NM | Y | Y | N  | NM | NM |
| Tang A                  | Y | Y | N | Y | Y | Y | Y | Y | Y  | N | Y | Y | Y | Y | NM | Y | Y | N  | NM | NM |
| Tian SJ                 | Y | Y | N | Y | Y | Y | Y | Y | Y  | Y | Y | Y | Y | Y | NM | Y | Y | Y  | N  | Y  |
| Timothy J. Judson       | Y | Y | N | Y | Y | Y | Y | Y | NM | Y | Y | Y | Y | Y | NM | Y | Y | Y  | N  | NM |
| Tolia VM                | Y | Y | N | Y | Y | Y | Y | Y | Y  | Y | Y | Y | Y | Y | NM | Y | Y | Y  | N  | NM |
| Tong H                  | Y | Y | N | Y | Y | Y | Y | Y | Y  | N | Y | Y | Y | Y | NM | Y | Y | N  | NM | NM |
| Tong ZD                 | Y | Y | N | Y | Y | Y | Y | Y | Y  | N | Y | Y | Y | Y | Y  | Y | Y | Y  | NM | Y  |
| Treibel TA              | Y | Y | N | Y | Y | Y | Y | Y | Y  | N | Y | Y | Y | Y | NM | Y | Y | N  | NM | NM |
| Wan R                   | Y | Y | N | Y | Y | Y | Y | Y | Y  | N | Y | Y | Y | Y | NM | Y | Y | Y  | N  | Y  |
| Wang AH                 | Y | Y | N | Y | Y | Y | Y | Y | Y  | Y | Y | Y | Y | Y | Y  | Y | Y | N  | NM | Y  |
| Wang D                  | Y | Y | N | Y | Y | Y | Y | Y | Y  | N | Y | Y | Y | Y | NM | Y | Y | Y  | N  | Y  |
| Wang JC                 | Y | Y | N | Y | Y | Y | Y | Y | Y  | N | Y | Y | Y | Y | Y  | Y | Y | N  | NM | NM |
| Wang KS                 | Y | Y | N | Y | Y | Y | Y | Y | NM | Y | Y | Y | Y | Y | Y  | Y | Y | NM | NM | NM |

1  
2  
3  
4  
5  
6  
7  
8  
9  
10  
11  
12  
13  
14  
15  
16  
17  
18  
19  
20  
21  
22  
23  
24  
25  
26  
27  
28  
29  
30  
31  
32  
33  
34  
35  
36  
37  
38  
39  
40  
41  
42  
43  
44  
45  
46

|          |   |   |   |   |   |   |   |   |    |   |   |   |   |   |    |   |   |   |    |    |
|----------|---|---|---|---|---|---|---|---|----|---|---|---|---|---|----|---|---|---|----|----|
| Wang S   | Y | Y | N | Y | Y | Y | Y | Y | Y  | N | Y | Y | Y | Y | NM | Y | Y | N | NM | NM |
| Wang T   | Y | Y | N | Y | Y | Y | Y | Y | NM | N | Y | Y | Y | Y | NM | Y | Y | N | NM | NM |
| Wang XB  | Y | Y | N | Y | Y | Y | Y | Y | NM | Y | Y | Y | Y | Y | NM | Y | Y | Y | N  | Y  |
| Wong HYF | Y | Y | N | Y | Y | Y | Y | Y | Y  | Y | Y | Y | Y | Y | NM | Y | Y | Y | NM | NM |
| Wu GY    | Y | Y | N | Y | Y | Y | Y | Y | Y  | Y | Y | Y | Y | Y | Y  | Y | Y | N | NM | Y  |
| Wu HP    | Y | Y | N | Y | Y | Y | Y | Y | Y  | N | Y | Y | Y | Y | Y  | Y | Y | N | NM | NM |
| Wu QR    | Y | Y | N | Y | Y | Y | Y | Y | Y  | N | Y | Y | Y | Y | NM | Y | Y | Y | NM | NM |
| Wu XQ    | Y | Y | N | Y | Y | Y | Y | Y | Y  | Y | Y | Y | Y | Y | Y  | Y | Y | N | NM | NM |
| Wu Y     | Y | Y | N | Y | Y | Y | Y | Y | Y  | N | Y | Y | Y | Y | NM | Y | Y | N | NM | NM |
| Wu YL    | Y | Y | N | Y | Y | Y | Y | Y | Y  | Y | Y | Y | Y | Y | NM | Y | Y | N | NM | NM |
| Xiang TX | Y | Y | N | Y | Y | Y | Y | Y | NM | Y | Y | Y | Y | Y | NM | Y | Y | N | N  | NM |
| Xiao KH  | Y | Y | N | Y | Y | Y | Y | Y | Y  | Y | Y | Y | Y | Y | NM | Y | Y | Y | NM | NM |
| Xie JW   | Y | Y | N | Y | Y | Y | Y | Y | Y  | Y | Y | Y | Y | Y | NM | Y | Y | Y | NM | NM |
| Xie YB   | Y | Y | N | Y | Y | Y | Y | Y | Y  | N | Y | Y | Y | Y | NM | Y | Y | N | NM | NM |
| Xu TM    | Y | Y | N | Y | Y | Y | Y | Y | Y  | Y | Y | Y | Y | Y | NM | Y | Y | Y | N  | NM |
| Yang K   | Y | Y | N | Y | Y | Y | Y | Y | NM | N | Y | Y | Y | Y | NM | Y | Y | N | NM | NM |
| Yang RR  | Y | Y | N | Y | Y | Y | Y | Y | Y  | Y | Y | Y | Y | Y | NM | Y | Y | Y | N  | Y  |
| Yang YL  | Y | Y | N | Y | Y | Y | Y | Y | Y  | N | Y | Y | Y | Y | NM | Y | Y | N | NM | NM |
| Yang YX  | Y | Y | N | Y | Y | Y | Y | Y | Y  | N | Y | Y | Y | Y | NM | Y | Y | N | NM | NM |
| Yao QD   | Y | Y | N | Y | Y | Y | Y | Y | Y  | Y | Y | Y | Y | Y | Y  | Y | Y | Y | NM | NM |
| Yao XY   | Y | Y | N | Y | Y | Y | Y | Y | Y  | Y | Y | Y | Y | Y | Y  | Y | Y | Y | NM | Y  |
| Ye XX    | Y | Y | N | Y | Y | Y | Y | Y | NM | N | Y | Y | Y | Y | NM | Y | Y | N | NM | NM |
| Ye Y     | Y | Y | N | Y | Y | Y | Y | Y | Y  | Y | Y | Y | Y | Y | NM | Y | Y | Y | NM | NM |
| Yu FT    | Y | Y | N | Y | Y | Y | Y | Y | Y  | Y | Y | Y | Y | Y | Y  | Y | Y | Y | N  | NM |
| Yu JX    | Y | Y | N | Y | Y | Y | Y | Y | NM | N | Y | Y | Y | Y | NM | Y | Y | N | NM | Y  |

|    |          |   |   |   |   |   |   |   |   |    |   |   |   |   |    |    |   |   |    |    |
|----|----------|---|---|---|---|---|---|---|---|----|---|---|---|---|----|----|---|---|----|----|
| 5  | Yu X     | Y | Y | N | Y | Y | Y | Y | Y | Y  | Y | Y | Y | Y | Y  | Y  | Y | N | NM | NM |
| 6  | Yuan L   | Y | Y | N | Y | Y | Y | Y | Y | Y  | Y | Y | Y | Y | NM | Y  | Y | N | NM | NM |
| 7  | Zeng J   | Y | Y | N | Y | Y | Y | Y | Y | Y  | Y | Y | Y | Y | NM | Y  | Y | N | NM | NM |
| 9  | Zeng WZ  | Y | Y | N | Y | Y | Y | Y | Y | Y  | Y | Y | Y | Y | Y  | Y  | Y | N | NM | NM |
| 10 | Zhai HL  | Y | Y | N | Y | Y | Y | Y | Y | N  | Y | Y | Y | Y | NM | Y  | Y | N | NM | NM |
| 11 | Zhan H   | Y | Y | N | Y | Y | Y | Y | Y | N  | Y | Y | Y | Y | NM | Y  | Y | N | NM | NM |
| 13 | Zhang JJ | Y | Y | N | Y | Y | Y | Y | N | NM | N | Y | Y | Y | Y  | NM | Y | N | N  | Y  |
| 14 | Zhang KY | Y | Y | N | Y | Y | Y | Y | Y | N  | Y | Y | Y | Y | Y  | Y  | Y | N | N  | Y  |
| 15 | Zhang R  | Y | Y | N | Y | Y | Y | Y | Y | Y  | Y | Y | Y | Y | NM | Y  | Y | N | NM | NM |
| 16 | Zhang YC | Y | Y | N | Y | Y | Y | Y | Y | N  | Y | Y | Y | Y | Y  | Y  | Y | Y | NM | Y  |
| 17 | Zhang YD | Y | Y | N | Y | Y | Y | Y | Y | N  | Y | Y | Y | Y | NM | Y  | Y | N | NM | NM |
| 18 | Zhao L   | Y | Y | N | Y | Y | Y | Y | Y | Y  | Y | Y | Y | Y | Y  | Y  | Y | N | NM | NM |
| 19 | Zhong ZM | Y | Y | N | Y | Y | Y | Y | Y | N  | Y | Y | Y | Y | Y  | Y  | Y | N | N  | NM |
| 20 | Zhou H   | Y | Y | N | Y | Y | Y | Y | Y | N  | Y | Y | Y | Y | NM | Y  | Y | N | NM | NM |
| 21 | Zhu SQ   | Y | Y | N | Y | Y | Y | Y | Y | N  | Y | Y | Y | Y | NM | Y  | Y | Y | NM | NM |

Y, Yes; N, Not; NM, not mentioned.

1  
2  
3 According to quality of cross-sectional studies (AXIS) scale (Downes MJ, Brennan  
4 ML, Williams HC, Dean RS. Development of a critical appraisal tool to assess the  
5 quality of cross-sectional studies (AXIS). *BMJ open* 2016; 6(12): e011458.):  
6  
7

8 *Introduction*

9  
10 1. Were the aims/objectives of the study clear?  
11

12 *Methods*

- 13 2. Was the study design appropriate for the stated aim(s)?  
14 3. Was the sample size justified?  
15 4. Was the target/reference population clearly defined? (Is it clear who the research  
16 was about?)  
17 5. Was the sample frame taken from an appropriate population base so that it  
18 closely represented the target/reference population under investigation?  
19 6. Was the selection process likely to select subjects/participants that were  
20 representative of the target/reference population under investigation?  
21 7. Were measures undertaken to address and categorise non-responders?  
22 8. Were the risk factor and outcome variables measured appropriate to the aims of  
23 the study?  
24 9. Were the risk factor and outcome variables measured correctly using instruments/  
25 measurements that had been trialled, piloted or published previously?  
26 10. Is it clear what was used to determined statistical significance and/or precision  
27 estimates? (eg, p values, CIs)  
28 11. Were the methods (including statistical methods) sufficiently described to  
29 enable them to be repeated?  
30  
31  
32  
33  
34  
35  
36

37 *Results*

- 38 12. Were the basic data adequately described?  
39 13. Does the response rate raise concerns about non-response bias?  
40 14. If appropriate, was information about non-responders described?  
41 15. Were the results internally consistent?  
42 16. Were the results for the analyses described in the methods, presented?  
43  
44  
45

46 *Discussion*

- 47 17. Were the authors' discussions and conclusions justified by the results?  
48 18. Were the limitations of the study discussed?  
49  
50

51 *Other*

- 52 19. Were there any funding sources or conflicts of interest that may affect the  
53 authors' interpretation of the results?  
54 20. Was ethical approval or consent of participants attained?  
55  
56  
57  
58  
59  
60

**Supplementary Table 4 Results of sensitivity analysis**

| <b>Study omitted</b>                                    | <b>Estimate</b> | <b>[95% Conf. Interval]</b> |          |
|---------------------------------------------------------|-----------------|-----------------------------|----------|
| Amy V. Dora                                             | 0.159917        | 0.145099                    | 0.174734 |
| An YH                                                   | 0.160117        | 0.145304                    | 0.17493  |
| Arima                                                   | 0.159967        | 0.145152                    | 0.174781 |
| Backer JA                                               | 0.160788        | 0.145941                    | 0.175635 |
| Bai M                                                   | 0.162473        | 0.14746                     | 0.177486 |
| Bai R                                                   | 0.159756        | 0.144896                    | 0.174617 |
| Bai SL                                                  | 0.159914        | 0.145102                    | 0.174726 |
| Bin YF                                                  | 0.160541        | 0.145709                    | 0.175374 |
| Böhmer                                                  | 0.160182        | 0.145366                    | 0.174998 |
| COVID-19 National<br>Incident Room Surveillance<br>Team | 0.154752        | 0.139816                    | 0.169688 |
| Cao JM                                                  | 0.159624        | 0.144804                    | 0.174444 |
| Carla Felice                                            | 0.159907        | 0.14509                     | 0.174724 |
| Chan JFW                                                | 0.160088        | 0.145276                    | 0.1749   |
| Chen B                                                  | 0.160439        | 0.145601                    | 0.175278 |
| Chen J                                                  | 0.161997        | 0.147082                    | 0.176913 |
| Chen T                                                  | 0.160215        | 0.145374                    | 0.175057 |
| Chen Y                                                  | 0.160124        | 0.145233                    | 0.175015 |
| Chen YJ                                                 | 0.160777        | 0.145907                    | 0.175648 |
| Cheng ZP                                                | 0.160265        | 0.145445                    | 0.175085 |
| Ding Y                                                  | 0.160435        | 0.145602                    | 0.175268 |
| Dong X                                                  | 0.160136        | 0.145322                    | 0.17495  |
| Dong XC                                                 | 0.161107        | 0.146241                    | 0.175974 |
| Dong YY                                                 | 0.159622        | 0.144797                    | 0.174447 |
| Feng XP                                                 | 0.160109        | 0.145278                    | 0.174941 |
| G-u. Kim                                                | 0.159691        | 0.14479                     | 0.174591 |
| Gao T                                                   | 0.160288        | 0.145461                    | 0.175114 |
| Gautret P                                               | 0.160077        | 0.145252                    | 0.174901 |
| Hu SX                                                   | 0.166479        | 0.151279                    | 0.181678 |
| Huang DD                                                | 0.160566        | 0.145719                    | 0.175413 |
| Ji GH                                                   | 0.160334        | 0.145505                    | 0.175162 |
| Jia CY                                                  | 0.160587        | 0.145753                    | 0.175422 |
| Jiang R                                                 | 0.160265        | 0.145445                    | 0.175085 |
| Jin MH                                                  | 0.160126        | 0.145313                    | 0.17494  |
| Kang M                                                  | 0.160318        | 0.145493                    | 0.175143 |
| Ke B                                                    | 0.159857        | 0.145037                    | 0.174677 |
| Ki M                                                    | 0.160177        | 0.145355                    | 0.174998 |
| Lai XQ                                                  | 0.160934        | 0.146077                    | 0.17579  |
| Le TQM                                                  | 0.160145        | 0.145331                    | 0.17496  |
| Lei MY                                                  | 0.159996        | 0.145125                    | 0.174868 |
| Li CY                                                   | 0.160098        | 0.145285                    | 0.17491  |



|    |                    |          |          |          |
|----|--------------------|----------|----------|----------|
| 1  |                    |          |          |          |
| 2  |                    |          |          |          |
| 3  | Li W               | 0.159889 | 0.145078 | 0.174701 |
| 4  | Li Y               | 0.160505 | 0.145674 | 0.175336 |
| 5  | Li Y               | 0.160052 | 0.145188 | 0.174915 |
| 6  | Li Y               | 0.160052 | 0.145188 | 0.174915 |
| 7  | Liao XN            | 0.16019  | 0.145363 | 0.175017 |
| 8  | Lin ZF             | 0.161122 | 0.146225 | 0.176019 |
| 9  | Lin ZF             | 0.161122 | 0.146225 | 0.176019 |
| 10 | Liu BM             | 0.15864  | 0.143802 | 0.173479 |
| 11 | Liu BY             | 0.15845  | 0.143602 | 0.173298 |
| 12 | Liu DH             | 0.160114 | 0.145298 | 0.17493  |
| 13 | Liu DH             | 0.160114 | 0.145298 | 0.17493  |
| 14 | Liu F              | 0.160126 | 0.145313 | 0.17494  |
| 15 | Liu F              | 0.159829 | 0.145013 | 0.174645 |
| 16 | Liu GT             | 0.16016  | 0.145321 | 0.174999 |
| 17 | Liu GT             | 0.16016  | 0.145321 | 0.174999 |
| 18 | Liu MQ             | 0.159952 | 0.145141 | 0.174764 |
| 19 | Liu X              | 0.160078 | 0.145266 | 0.174889 |
| 20 | Liu YL             | 0.160154 | 0.14534  | 0.174969 |
| 21 | Liu YL             | 0.160154 | 0.14534  | 0.174969 |
| 22 | Liu YX             | 0.160145 | 0.145331 | 0.17496  |
| 23 | Liu ZR             | 0.160114 | 0.145298 | 0.17493  |
| 24 | Lu RF              | 0.160293 | 0.145472 | 0.175114 |
| 25 | Lu RF              | 0.160293 | 0.145472 | 0.175114 |
| 26 | Lu XX              | 0.160112 | 0.14523  | 0.174994 |
| 27 | Lu Y               | 0.160117 | 0.145304 | 0.17493  |
| 28 | Lucy Rivett        | 0.16025  | 0.145415 | 0.175085 |
| 29 | Luo SH             | 0.160799 | 0.145955 | 0.175644 |
| 30 | Luo SH             | 0.160799 | 0.145955 | 0.175644 |
| 31 | M.M. Arons         | 0.160361 | 0.145532 | 0.175191 |
| 32 | Ma Y               | 0.159889 | 0.14506  | 0.174719 |
| 33 | Ma YL              | 0.157632 | 0.142774 | 0.17249  |
| 34 | Ma YL              | 0.157632 | 0.142774 | 0.17249  |
| 35 | MacIntyre CR       | 0.159865 | 0.145052 | 0.174677 |
| 36 | Martin C           | 0.158675 | 0.143848 | 0.173502 |
| 37 | McMichael TM       | 0.161231 | 0.146351 | 0.176112 |
| 38 | Michel Bielecki    | 0.154902 | 0.139995 | 0.169809 |
| 39 | Michel Bielecki    | 0.154902 | 0.139995 | 0.169809 |
| 40 | Miyamae Y          | 0.159429 | 0.14461  | 0.174248 |
| 41 | Mohammed A M Ahmed | 0.159619 | 0.144789 | 0.174449 |
| 42 | Moriarty LF        | 0.147166 | 0.132046 | 0.162286 |
| 43 | Moriarty LF        | 0.147166 | 0.132046 | 0.162286 |
| 44 | Muhammet Furkan    | 0.159858 | 0.145014 | 0.174701 |
| 45 | Korkmaz            | 0.159858 | 0.145014 | 0.174701 |
| 46 | Nagler AR          | 0.145287 | 0.1296   | 0.160974 |
| 47 | Niu YL             | 0.160036 | 0.145221 | 0.174851 |
| 48 | Niu YL             | 0.160036 | 0.145221 | 0.174851 |
| 49 | Ou JM              | 0.162691 | 0.147754 | 0.177628 |
| 50 | Pan XQ             | 0.160336 | 0.145499 | 0.175172 |
| 51 | Pongpirul          | 0.160136 | 0.145322 | 0.17495  |
| 52 | Pongpirul          | 0.160136 | 0.145322 | 0.17495  |
| 53 | Seong Eun          | 0.160169 | 0.14533  | 0.175009 |
| 54 | She X              | 0.160117 | 0.145304 | 0.17493  |
| 55 | Song W             | 0.15977  | 0.144954 | 0.174586 |
| 56 | Song W             | 0.15977  | 0.144954 | 0.174586 |
| 57 | Spiteri G          | 0.160327 | 0.145502 | 0.175153 |
| 58 | Sun DF             | 0.160311 | 0.145489 | 0.175134 |
| 59 | Sun WW             | 0.160593 | 0.145615 | 0.17557  |
| 60 | Sun WW             | 0.160593 | 0.145615 | 0.17557  |

1  
2  
3  
4  
5  
6  
7  
8  
9  
10  
11  
12  
13  
14  
15  
16  
17  
18  
19  
20  
21  
22  
23  
24  
25  
26  
27  
28  
29  
30  
31  
32  
33  
34  
35  
36  
37  
38  
39  
40  
41  
42  
43  
44  
45  
46  
47  
48  
49  
50  
51  
52  
53  
54  
55  
56  
57  
58  
59  
60

|                   |          |          |          |
|-------------------|----------|----------|----------|
| Sun Z             | 0.160053 | 0.145235 | 0.174871 |
| Tang A            | 0.160186 | 0.145373 | 0.175    |
| Tian SJ           | 0.161771 | 0.14685  | 0.176692 |
| Timothy J. Judson | 0.151894 | 0.136582 | 0.167205 |
| Tolia VM          | 0.160244 | 0.145422 | 0.175066 |
| Tong H            | 0.160081 | 0.145262 | 0.174901 |
| Tong ZD           | 0.159975 | 0.145163 | 0.174788 |
| Treibel TA        | 0.171275 | 0.155777 | 0.186774 |
| Wan R             | 0.160696 | 0.145853 | 0.175538 |
| Wang AH           | 0.160749 | 0.145901 | 0.175596 |
| Wang D            | 0.158459 | 0.143624 | 0.173295 |
| Wang JC           | 0.160456 | 0.145625 | 0.175287 |
| Wang KS           | 0.159996 | 0.145183 | 0.17481  |
| Wang S            | 0.156696 | 0.141857 | 0.171535 |
| Wang T            | 0.160495 | 0.145665 | 0.175326 |
| Wang XB           | 0.169063 | 0.153807 | 0.18432  |
| Wong HYF          | 0.160162 | 0.145326 | 0.174999 |
| Wu GY             | 0.160936 | 0.146082 | 0.175789 |
| Wu HP             | 0.16013  | 0.145311 | 0.174949 |
| Wu QR             | 0.160484 | 0.145651 | 0.175316 |
| Wu XQ             | 0.159429 | 0.14461  | 0.174248 |
| Wu Y              | 0.160247 | 0.145428 | 0.175066 |
| Wu YL             | 0.159743 | 0.14493  | 0.174556 |
| Xiang TX          | 0.160371 | 0.14554  | 0.175201 |
| Xiang TX          | 0.160371 | 0.14554  | 0.175201 |
| Xiao KH           | 0.160777 | 0.145907 | 0.175648 |
| Xie JW            | 0.160088 | 0.145276 | 0.1749   |
| Xie YB            | 0.160162 | 0.145337 | 0.174988 |
| Xu TM             | 0.160215 | 0.145385 | 0.175046 |
| Yang K            | 0.159866 | 0.145033 | 0.1747   |
| Yang RR           | 0.158906 | 0.144064 | 0.173749 |
| Yang YL           | 0.160107 | 0.145295 | 0.17492  |
| Yang YX           | 0.160846 | 0.145999 | 0.175692 |
| Yao QD            | 0.160449 | 0.145621 | 0.175278 |
| Yao XY            | 0.160159 | 0.145347 | 0.174971 |
| Ye XX             | 0.160105 | 0.145289 | 0.17492  |
| Ye Y              | 0.165672 | 0.150294 | 0.181051 |
| Yu FT             | 0.160686 | 0.145844 | 0.175528 |
| Yu JX             | 0.160779 | 0.145932 | 0.175625 |
| Yu X              | 0.160915 | 0.14606  | 0.17577  |
| Yuan L            | 0.159478 | 0.144657 | 0.174299 |
| Zeng J            | 0.16213  | 0.147224 | 0.177035 |
| Zeng WZ           | 0.160151 | 0.145323 | 0.174979 |
| Zhai HL           | 0.160136 | 0.145322 | 0.17495  |

1  
2  
3  
4  
5  
6  
7  
8  
9  
10  
11  
12  
13  
14  
15  
16  
17  
18  
19  
20  
21  
22  
23  
24  
25  
26  
27  
28  
29  
30  
31  
32  
33  
34  
35  
36  
37  
38  
39  
40  
41  
42  
43  
44  
45  
46  
47  
48  
49  
50  
51  
52  
53  
54  
55  
56  
57  
58  
59  
60

|          |          |          |          |
|----------|----------|----------|----------|
| Zhan H   | 0.160088 | 0.145276 | 0.1749   |
| Zhang JJ | 0.160078 | 0.145266 | 0.174889 |
| Zhang KY | 0.160016 | 0.145202 | 0.17483  |
| Zhang R  | 0.16019  | 0.145352 | 0.175028 |
| Zhang YC | 0.159994 | 0.145176 | 0.174813 |
| Zhang YD | 0.160201 | 0.145384 | 0.175018 |
| Zhao L   | 0.159846 | 0.145024 | 0.174668 |
| Zhong ZM | 0.159216 | 0.144325 | 0.174108 |
| Zhou H   | 0.160095 | 0.14528  | 0.17491  |
| Zhu SQ   | 0.163999 | 0.14901  | 0.178988 |
| Combined | 0.16009  | 0.145281 | 0.174899 |

---

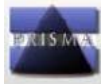

# PRISMA 2009 Checklist

1  
2  
3  
4  
5  
6  
7  
8  
9  
10  
11  
12  
13  
14  
15  
16  
17  
18  
19  
20  
21  
22  
23  
24  
25  
26  
27  
28  
29  
30  
31  
32  
33  
34  
35  
36  
37  
38  
39  
40  
41  
42  
43  
44  
45  
46  
47

| Section/topic                      | #  | Checklist item                                                                                                                                                                                                                                                                                              | Reported on page # |
|------------------------------------|----|-------------------------------------------------------------------------------------------------------------------------------------------------------------------------------------------------------------------------------------------------------------------------------------------------------------|--------------------|
| <b>TITLE</b>                       |    |                                                                                                                                                                                                                                                                                                             |                    |
| Title                              | 1  | Identify the report as a systematic review, meta-analysis, or both.                                                                                                                                                                                                                                         | 1                  |
| <b>ABSTRACT</b>                    |    |                                                                                                                                                                                                                                                                                                             |                    |
| Structured summary                 | 2  | Provide a structured summary including, as applicable: background; objectives; data sources; study eligibility criteria, participants, and interventions; study appraisal and synthesis methods; results; limitations; conclusions and implications of key findings; systematic review registration number. | 2                  |
| <b>INTRODUCTION</b>                |    |                                                                                                                                                                                                                                                                                                             |                    |
| Rationale                          | 3  | Describe the rationale for the review in the context of what is already known.                                                                                                                                                                                                                              | 4                  |
| Objectives                         | 4  | Provide an explicit statement of questions being addressed with reference to participants, interventions, comparisons, outcomes, and study design (PICOS).                                                                                                                                                  | 5                  |
| <b>METHODS</b>                     |    |                                                                                                                                                                                                                                                                                                             |                    |
| Protocol and registration          | 5  | Indicate if a review protocol exists, if and where it can be accessed (e.g., Web address), and, if available, provide registration information including registration number.                                                                                                                               | 5                  |
| Eligibility criteria               | 6  | Specify study characteristics (e.g., PICOS, length of follow-up) and report characteristics (e.g., years considered, language, publication status) used as criteria for eligibility, giving rationale.                                                                                                      | 5-6                |
| Information sources                | 7  | Describe all information sources (e.g., databases with dates of coverage, contact with study authors to identify additional studies) in the search and date last searched.                                                                                                                                  | 5                  |
| Search                             | 8  | Present full electronic search strategy for at least one database, including any limits used, such that it could be repeated.                                                                                                                                                                               | 5                  |
| Study selection                    | 9  | State the process for selecting studies (i.e., screening, eligibility, included in systematic review, and, if applicable, included in the meta-analysis).                                                                                                                                                   | 6                  |
| Data collection process            | 10 | Describe method of data extraction from reports (e.g., piloted forms, independently, in duplicate) and any processes for obtaining and confirming data from investigators.                                                                                                                                  | 7                  |
| Data items                         | 11 | List and define all variables for which data were sought (e.g., PICOS, funding sources) and any assumptions and simplifications made.                                                                                                                                                                       | 7                  |
| Risk of bias in individual studies | 12 | Describe methods used for assessing risk of bias of individual studies (including specification of whether this was done at the study or outcome level), and how this information is to be used in any data synthesis.                                                                                      | 8                  |
| Summary measures                   | 13 | State the principal summary measures (e.g., risk ratio, difference in means).                                                                                                                                                                                                                               | 8                  |
| Synthesis of results               | 14 | Describe the methods of handling data and combining results of studies, if done, including measures of consistency (e.g., $I^2$ ) for each meta-analysis.                                                                                                                                                   | 8                  |

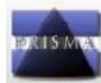

# PRISMA 2009 Checklist

Page 1 of 2

| Section/topic                 | #  | Checklist item                                                                                                                                                                                           | Reported on page # |
|-------------------------------|----|----------------------------------------------------------------------------------------------------------------------------------------------------------------------------------------------------------|--------------------|
| Risk of bias across studies   | 15 | Specify any assessment of risk of bias that may affect the cumulative evidence (e.g., publication bias, selective reporting within studies).                                                             | 8                  |
| Additional analyses           | 16 | Describe methods of additional analyses (e.g., sensitivity or subgroup analyses, meta-regression), if done, indicating which were pre-specified.                                                         | 8                  |
| <b>RESULTS</b>                |    |                                                                                                                                                                                                          |                    |
| Study selection               | 17 | Give numbers of studies screened, assessed for eligibility, and included in the review, with reasons for exclusions at each stage, ideally with a flow diagram.                                          | 9                  |
| Study characteristics         | 18 | For each study, present characteristics for which data were extracted (e.g., study size, PICOS, follow-up period) and provide the citations.                                                             | 9                  |
| Risk of bias within studies   | 19 | Present data on risk of bias of each study and, if available, any outcome level assessment (see item 12).                                                                                                | 11                 |
| Results of individual studies | 20 | For all outcomes considered (benefits or harms), present, for each study: (a) simple summary data for each intervention group (b) effect estimates and confidence intervals, ideally with a forest plot. | 9                  |
| Synthesis of results          | 21 | Present results of each meta-analysis done, including confidence intervals and measures of consistency.                                                                                                  | 9-11               |
| Risk of bias across studies   | 22 | Present results of any assessment of risk of bias across studies (see Item 15).                                                                                                                          | 11                 |
| Additional analysis           | 23 | Give results of additional analyses, if done (e.g., sensitivity or subgroup analyses, meta-regression [see Item 16]).                                                                                    | 10-11              |
| <b>DISCUSSION</b>             |    |                                                                                                                                                                                                          |                    |
| Summary of evidence           | 24 | Summarize the main findings including the strength of evidence for each main outcome; consider their relevance to key groups (e.g., healthcare providers, users, and policy makers).                     | 11-13              |
| Limitations                   | 25 | Discuss limitations at study and outcome level (e.g., risk of bias), and at review-level (e.g., incomplete retrieval of identified research, reporting bias).                                            | 14-15              |
| Conclusions                   | 26 | Provide a general interpretation of the results in the context of other evidence, and implications for future research.                                                                                  | 15                 |
| <b>FUNDING</b>                |    |                                                                                                                                                                                                          |                    |
| Funding                       | 27 | Describe sources of funding for the systematic review and other support (e.g., supply of data); role of funders for the systematic review.                                                               | 15                 |

From: Moher D, Liberati A, Tetzlaff J, Altman DG, The PRISMA Group (2009). Preferred Reporting Items for Systematic Reviews and Meta-Analyses: The PRISMA Statement. PLoS Med 6(7): e1000097. doi:10.1371/journal.pmed1000097

For more information, visit: [www.prisma-statement.org](http://www.prisma-statement.org).

Page 2 of 2

For peer review only - <http://bmjopen.bmj.com/site/about/guidelines.xhtml>

# BMJ Open

## Rate of asymptomatic COVID-19 among ascertained infections in different region and population groups: A systematic review and meta-analysis including 130,123 infections from 241 studies

|                                 |                                                                                                                                                                                                                                                                                                                                                                                                                                                                                                                                               |
|---------------------------------|-----------------------------------------------------------------------------------------------------------------------------------------------------------------------------------------------------------------------------------------------------------------------------------------------------------------------------------------------------------------------------------------------------------------------------------------------------------------------------------------------------------------------------------------------|
| Journal:                        | <i>BMJ Open</i>                                                                                                                                                                                                                                                                                                                                                                                                                                                                                                                               |
| Manuscript ID                   | bmjopen-2021-049752.R1                                                                                                                                                                                                                                                                                                                                                                                                                                                                                                                        |
| Article Type:                   | Original research                                                                                                                                                                                                                                                                                                                                                                                                                                                                                                                             |
| Date Submitted by the Author:   | 21-Jun-2021                                                                                                                                                                                                                                                                                                                                                                                                                                                                                                                                   |
| Complete List of Authors:       | Chen, Xiao; Zhejiang University<br>Huang, Ziyue; Mianyang Maternal and Child Health Care Hospital<br>Wang, Jingxuan; The Chinese University of Hong Kong<br>Zhao, Shi; The Chinese University of Hong Kong; The Chinese University of Hong Kong<br>Wong, Martin Chi-Sang; The Chinese University of Hong Kong<br>Chong, Ka; The Chinese University of Hong Kong; The Chinese University of Hong Kong<br>He, Daihai; Hong Kong Polytechnic University, Department of Applied Mathematics<br>Li, Jinhui; The Chinese University of Hong Kong, ; |
| <b>Primary Subject Heading</b>: | Public health                                                                                                                                                                                                                                                                                                                                                                                                                                                                                                                                 |
| Secondary Subject Heading:      | Infectious diseases, Epidemiology                                                                                                                                                                                                                                                                                                                                                                                                                                                                                                             |
| Keywords:                       | COVID-19, INFECTIOUS DISEASES, EPIDEMIOLOGY, PUBLIC HEALTH                                                                                                                                                                                                                                                                                                                                                                                                                                                                                    |
|                                 |                                                                                                                                                                                                                                                                                                                                                                                                                                                                                                                                               |

SCHOLARONE™  
Manuscripts

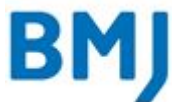

I, the Submitting Author has the right to grant and does grant on behalf of all authors of the Work (as defined in the below author licence), an exclusive licence and/or a non-exclusive licence for contributions from authors who are: i) UK Crown employees; ii) where BMJ has agreed a CC-BY licence shall apply, and/or iii) in accordance with the terms applicable for US Federal Government officers or employees acting as part of their official duties; on a worldwide, perpetual, irrevocable, royalty-free basis to BMJ Publishing Group Ltd ("BMJ") its licensees and where the relevant Journal is co-owned by BMJ to the co-owners of the Journal, to publish the Work in this journal and any other BMJ products and to exploit all rights, as set out in our [licence](#).

The Submitting Author accepts and understands that any supply made under these terms is made by BMJ to the Submitting Author unless you are acting as an employee on behalf of your employer or a postgraduate student of an affiliated institution which is paying any applicable article publishing charge ("APC") for Open Access articles. Where the Submitting Author wishes to make the Work available on an Open Access basis (and intends to pay the relevant APC), the terms of reuse of such Open Access shall be governed by a Creative Commons licence – details of these licences and which [Creative Commons](#) licence will apply to this Work are set out in our licence referred to above.

Other than as permitted in any relevant BMJ Author's Self Archiving Policies, I confirm this Work has not been accepted for publication elsewhere, is not being considered for publication elsewhere and does not duplicate material already published. I confirm all authors consent to publication of this Work and authorise the granting of this licence.

1 **Rate of asymptomatic COVID-19 among ascertained infections in**  
2 **different region and population groups: A systematic review and**  
3 **meta-analysis including 130,123 infections from 241 studies**

4  
5 Xiao Chen<sup>a#</sup>, Ziyue Huang<sup>b#</sup>, Jingxuan Wang<sup>c##</sup>, Shi Zhao<sup>c,d</sup>, Martin Chi Sang Wong<sup>c</sup>,  
6 Marc Ka Chun Chong<sup>c,d,e</sup>, Daihai He<sup>f</sup>, and Jinhui Li<sup>c\*</sup>

7  
8  
9 **Affiliations:**

10 <sup>a</sup> School of Public Health, Zhejiang University, Zhejiang, China

11 <sup>b</sup> Mianyang Maternal and Child Health Care Hospital, Sichuan, China

12 <sup>c</sup> JC School of Public Health and Primary Care, The Chinese University of Hong Kong,  
13 Hong Kong SAR, China

14 <sup>d</sup> Shenzhen Research Institute, The Chinese University of Hong Kong, Shenzhen, China

15 <sup>e</sup> Centre for Health System and Policy Research, Faculty of Medicine, CUHK

16 <sup>f</sup> Department of Applied Mathematics, Hong Kong Polytechnic University, Hong Kong  
17 SAR, China

18  
19 Authors' contact:

20 Xiao Chen: [chenxiao9410@zju.edu.cn](mailto:chenxiao9410@zju.edu.cn)

21 Ziyue Huang: [hzy950822@163.com](mailto:hzy950822@163.com)

22 Jingxuan Wang: [jxwang@link.cuhk.edu.hk](mailto:jxwang@link.cuhk.edu.hk)

23 Shi Zhao: [zhaoshi.cmsa@gmail.com](mailto:zhaoshi.cmsa@gmail.com)

24 Martin Chi Sang Wong: [wong\\_martin@cuhk.edu.hk](mailto:wong_martin@cuhk.edu.hk)

25 Marc Ka Chun Chong: [marc@cuhk.edu.hk](mailto:marc@cuhk.edu.hk)

26 Daihai He: [daihai.he@polyu.edu.hk](mailto:daihai.he@polyu.edu.hk)

27 Jinhui Li: [clairehh4588@gmail.com](mailto:clairehh4588@gmail.com)

28 <sup>#</sup> They contributed equally to this work.

29  
30 <sup>\*</sup> correspondence to: Jinhui Li, JC School of Public Health and Primary Care, The  
31 Chinese University of Hong Kong, Hong Kong SAR, China, Email:  
32 [clairehh4588@gmail.com](mailto:clairehh4588@gmail.com); or Jingxuan Wang, JC School of Public Health and Primary  
33 Care, The Chinese University of Hong Kong, Hong Kong SAR, China, Email:  
34 [jxwang@link.cuhk.edu.hk](mailto:jxwang@link.cuhk.edu.hk).



## 35 **Abstract**

36 *Introduction:* Asymptomatic infection of SARS-CoV-2 may lead to silent community  
37 transmission and compromise pandemic control measures of COVID-19. We aimed to  
38 estimate the rate of asymptomatic COVID-19 infection from published studies, and  
39 compare this rate among different region and patient groups.

40  
41 *Methods:* This systematic review and meta-analysis was conducted according to the  
42 standards strictly following the ‘*Preferred Reporting Items for Systematic reviews and*  
43 *Meta-Analyses*’ (PRISMA) guideline. The electronic databases including Medline,  
44 Embase, PubMed, and three Chinese electronic databases (The Chinese National  
45 Knowledge Infrastructure (CNKI), WanFang Data, and VIP) from 1 November 2019  
46 to 31 December 2020 were searched. Original studies with sample size (or number of  
47 subjects) not less than 5 were included. Subgroup analyses were conducted according  
48 to different study types, study periods, geographical regions, and patients’  
49 demographics. The STATA command ‘*Metaprop*’ was implemented to conduct meta-  
50 analysis for the pooled rate estimates of asymptomatic infections with exact binomial  
51 and score test-based 95% confidence intervals (CIs).

52  
53 *Results:* A total of 130,123 ascertained COVID-19 infections in 241 studies were  
54 included in the meta-analysis, including 31,411 asymptomatic infections. The overall  
55 rate of asymptomatic infection was 23.6% (18.5%-29.1%) and 21.7% (16.8%-27.0%),  
56 before and after excluding pre-symptomatic cases, respectively. Subgroup analysis  
57 showed that the rate was significantly higher in pregnant women (48.8%, 28.9%-  
58 68.9%), children (32.1%, 24.4%-40.5%), and studies reporting screening programmes  
59 (36.0%, 24.6%-48.1%) conducted on or after 01 March 2020 (42.5%, 33.4%-51.9%).  
60 In terms of geographical regions, the rate was the highest in Africa (64.3%, 56.7%-  
61 71.6%), followed by America (40.0%, 27.4%-53.3%), Europe (28.1%, 19.0%-38.1%),  
62 and Asia (18.1%, 13.2%-23.5%).

63  
64 *Conclusion:* One-fifth of the COVID-19 infection is asymptomatic throughout the  
65 infection course. High proportion of asymptomatic infection were observed in some  
66 patient groups and regions. Public health policies targeting these high-risk groups may  
67 be recommended to achieve early identification and more stringent containment of the  
68 pandemic.

69

70 (300 words)

1  
2  
3  
4 71 **Keywords:** COVID-19; SARS-CoV-2; asymptomatic infection; asymptomatic ratio;  
5 72 meta-analysis.  
6

7 73  
8  
9  
10  
11  
12  
13  
14  
15  
16  
17  
18  
19  
20  
21  
22  
23  
24  
25  
26  
27  
28  
29  
30  
31  
32  
33  
34  
35  
36  
37  
38  
39  
40  
41  
42  
43  
44  
45  
46  
47  
48  
49  
50  
51  
52  
53  
54  
55  
56  
57  
58  
59  
60

For peer review only

1  
2  
3  
4 74 **Article Summary**  
5

6 75 **Strengths and limitations of this study**  
7

- 8  
9 76 1. The comprehensive systematic literature search included a greater number of  
10  
11 77 studies which reported varied asymptomatic infection rate.  
12  
13 78 2. Several subgroup analyses were conducted by considering different aspects of the  
14  
15 79 study design.  
16  
17 80 3. Heterogeneity in the asymptomatic infection rate shall be noted.  
18  
19 81 4. Cross-sectional design of most reviewed studies may misclassify 'pre-symptomatic'  
20  
21 82 as 'symptomatic' infections.  
22

23 83  
24  
25  
26  
27  
28  
29  
30  
31  
32  
33  
34  
35  
36  
37  
38  
39  
40  
41  
42  
43  
44  
45  
46  
47  
48  
49  
50  
51  
52  
53  
54  
55  
56  
57  
58  
59  
60

## 84 **Introduction**

85 In 2019, a cluster of severe pneumonia cases of unknown type were reported in Wuhan,  
86 China (1). Later coined as the coronavirus disease 2019 (COVID-19), it rapidly resulted  
87 in large-scale outbreaks across many regions. On 30 January 2020, the World Health  
88 Organization (WHO) declared the COVID-19 as a public health emergency of  
89 international concern (2), and further defined it as a pandemic on 11 March 2020. As  
90 of 2 September 2020, a cumulative total of 25,937,361 COVID-19 cases have been  
91 confirmed globally, with 861,910 associated deaths.

92  
93 The pathogen of COVID-19, i.e., severe acute respiratory syndrome coronavirus 2  
94 (SARS-CoV-2), is highly contagious, and could be transmitted from human to human  
95 (1, 3). The viral load in an asymptomatic patient has been found to be similar to that in  
96 symptomatic patients in a study of nine patients (4), and this observation was later  
97 confirmed in a study involving large samples (5). The early peaking of SARS-CoV-2  
98 viral load during the pre-symptomatic phase may cause silent community outbreaks (6).  
99 Further investigations also found that the asymptomatic infections may carry SARS-  
100 CoV-2 for more than 1 month, indicating the long-lasting risk of secondary infection  
101 (7-11).

102  
103 Determining the rate of asymptomatic infection is important as it may deepen the  
104 understanding of the real reproductive number ( $R_0$ ), as well as the true incidence and  
105 mortality rate of COVID-19. The rate may also function as an essential epidemiological  
106 parameter to inform disease combating policies, including the density and range of  
107 screening, patient isolation as well as early intervention (12). Nevertheless, the  
108 significance of the invisibly infected person as the source of infection depends on its  
109 distribution in the population, and the amount and duration of the virus excreted (13).  
110 The reported proportions of asymptomatic individuals in existing literature varied a lot  
111 (12), depending on their research settings (e.g. geographical region, screening vs. non-  
112 screening studies), demographic characteristics (e.g. age groups, pregnant women,

1  
2  
3  
4 113 children), and other latent factors. The present study performed a systematic review and  
5  
6 114 meta-analysis to estimate the asymptomatic infection rate based on published studies,  
7  
8 115 and compare the rate among different patient groups as well as study settings.  
9  
10 116

## 11 117 **Methods**

### 12 118 *Searching strategy*

13  
14  
15  
16 119 This systematic review and meta-analysis was conducted according to the standards  
17  
18 120 strictly following the '*Preferred Reporting Items for Systematic reviews and Meta-*  
19  
20 121 *Analyses*' (PRISMA) guideline (14). XC and ZH searched the Medline, Embase,  
21  
22 122 PubMed, and three Chinese electronic databases (the Chinese National Knowledge  
23  
24 123 Infrastructure [CNKI], WanFang Data, and VIP) from 1 November 2019 to 31  
25  
26 124 December 2020. The search string related to "COVID-19" AND "asymptomatic" was  
27  
28 125 systematically developed in PubMed with the help of its MeSH terms, and was applied  
29  
30 126 to all databases after discussing with an experienced Librarian (Maggie Choi). The  
31  
32 127 search fields of "Text Word" was applied to ensure the best possible search evidence  
33  
34 128 (**Supplementary Table 1**). No filters or limitations were applied to retrieve the best  
35  
36 129 possible result and to avoid excluding pre-indexed materials. Meanwhile, highly  
37  
38 130 relevant references were also searched (by XC and ZH) by reviewing the reference list  
39  
40 131 of the included articles. Two reviewers (XC and ZH) determined the eligible studies  
41  
42 132 independently. Consensus was reached by referral to a third reviewer (JW) when there  
43  
44 133 was disagreement. All manuscripts were imported into the Endnote software (version  
45  
46 134 X8, Thomson Reuters, Carlsbad, California) to store and manage the retrieved citations.  
47  
48 135 Duplicate studies were removed.

### 49 136 50 137 *Asymptomatic case and asymptomatic ratio*

51  
52 138 Several similar definitions of 'asymptomatic case' were noted in previous studies (15).  
53  
54 139 We followed the official definition from the State Council of China and the World  
55  
56 140 Health Organization (WHO) (16, 17), and defined 'asymptomatic case' as individuals  
57  
58  
59  
60

1  
2  
3  
4 141 who 1) have no clinical manifestations of COVID-19, such as fever, cough, sore throat,  
5  
6 142 and other self-perceived or clinically identifiable symptoms and signs; 2) have positive  
7  
8 143 result of SARS-CoV-2 pathogen test; and 3) does not develop symptoms until the end  
9  
10 144 of hospital admission or follow-up observations. Asymptomatic COVID-19 infection  
11  
12 145 rate, or asymptomatic ratio, is calculated as the proportion of asymptomatic cases  
13  
14 146 among all COVID-19 infections.

15  
16 147

#### 17 148 ***Literature screening and selection criteria***

19 149 All studies were screened by title and abstract first, followed by full texts if the study  
20  
21 150 meets the inclusion criteria, which consist of: (1) the studying subjects were diagnosed  
22  
23 151 with SARS-CoV-2 infection; (2) the study was designed as an observational study; and  
24  
25 152 (3) the numbers of asymptomatic and symptomatic COVID-19 infections were  
26  
27 153 explicitly and exactly reported.

28  
29 154

31 155 The literature screening was conducted without language or region restriction. The  
32  
33 156 exclusion criteria are as follows. They included (1) study that included patients without  
34  
35 157 virological evidence of SARS-CoV-2 infection; exclusion criterion (2) study which did  
36  
37 158 not investigate the distribution of asymptomatic COVID-19 infections among all  
38  
39 159 subjects; (3) study that is not classified as original research, such as reviews, comments,  
40  
41 160 case report; and (4) study has an overall sample size of less than 5.

42  
43 161

44 162 For the same group of subjects been reported by different articles, only articles with the  
45  
46 163 most updated and detailed information were included for further analysis.

47  
48  
49 164

#### 50 165 ***Data extraction and subgrouping schemes***

52 166 For eligible articles, two types of the information were extracted by the two reviewers  
53  
54 167 (XC and ZH) independently. For each study, we include two types of information: (1)  
55  
56 168 the basic information of the individual studies that contains the name of the first author,  
57  
58 169 investigation period, geographical region, and the study setting (screening and non-

1  
2  
3  
4 170 screening); and (2) the study settings, characteristics of subjects, sample size, and the  
5  
6 171 number of COVID-19 infections (total infections, pre-symptomatic infections, and  
7  
8 172 asymptomatic infections).

9 173 To ensure the accuracy of data, cross-checking was conducted after extraction of the  
10  
11 174 preliminary information. Disagreements were resolved through consensus or by referral  
12  
13 175 to the third reviewer (JW).

14  
15 176

16  
17 177 To explore the source of heterogeneity among the included studies, several subgroup  
18  
19 178 analyses were performed according to the study design and characteristics of subjects  
20  
21 179 in each study. First, we identified three groups based on the subjects' demographical  
22  
23 180 features. They included 'children' groups consisting of subjects less than 18 years old;  
24  
25 181 'pregnant women' groups involving expectant mothers as subjects; and the 'general  
26  
27 182 population' group. Second, three age groups were identified according to the subjects'  
28  
29 183 mean or median age:  $\leq 18$ , from 19 to 45, and  $> 45$  years, respectively. The selection  
30  
31 184 of mean or median age followed the statistics reported in each study. Third, studies  
32  
33 185 were categorized into 'screening' or 'non-screening' types by referring to the positive  
34  
35 186 rate of SARS-CoV-2 pathogen test among included subjects. In the screening studies,  
36  
37 187 the positive rate is less than 100%; while for non-screening studies, all subjects were  
38  
39 188 tested positive. Forth, we separated studies based on subjects from different  
40  
41 189 geographical regions including China, Asia (excluding China), the US and Europe. Last,  
42  
43 190 subgroup analysis was performed by study period, during which the subjects were  
44  
45 191 tested for COVID-19, including 'before 01 March 2020' or '01 March 2020 and  
46  
47 192 afterwards'.

48  
49 193

#### 50 194 ***Quality assessment***

51  
52 195 The quality of each included study was assessed by two researchers (XC and ZH)  
53  
54 196 independently using the quality of cross-sectional studies (AXIS) scale (18). There are  
55  
56 197 five components including 20 questions in the AXIS scale. Seven questions measure

1  
2  
3  
4 198 the quality of reporting; another seven questions measure the quality of study design,  
5  
6 199 and six questions measure the possible introduction of biases in each study.  
7  
8 200

### 9 201 *Statistical analysis*

10  
11 202 Accounting for all included studies, the pooled estimates of the asymptomatic rates  
12  
13 203 were generated with exact binomial-distributed likelihood framework and score test-  
14  
15 204 based 95% confidence intervals (CIs) (1). The STATA command “*metaprop*” was  
16  
17 205 adopted to conduct meta-analysis. Heterogeneity across the studies was examined by  
18  
19 206 the  $I^2$  statistic, measuring the proportion of total variation contributed by between-study  
20  
21 207 variation. The  $I^2$  values < 25%, ranging from 25% to 75%, and > 75% correspond to  
22  
23 208 the thresholds for three ordinal levels of heterogeneity including low, moderate, and  
24  
25 209 high, respectively (19).  
26

27 210

28  
29 211 Univariate and multivariate meta-regression analysis was performed to identify any  
30  
31 212 potential effects of modifiers or confounders on the estimated rate. We examined the  
32  
33 213 effects of the covariates including study population, age-specific proportion,  
34  
35 214 screening/non-screening study, geographical region, and time trend in multivariate  
36  
37 215 analysis. Sensitivity analysis was conducted by omitting one study at a time, generating  
38  
39 216 the pooled estimates and comparing with the original estimates. Potential publication  
40  
41 217 bias was examined by Egger’s test and visualized using a funnel plot. If the tests  
42  
43 218 indicated potential publication bias, the Trim and Fill’s method, which is based on a  
44  
45 219 modified funnel plot, would be adopted to adjust the small-study effect (20).  
46

47 220

48  
49 221 All analyses were performed using STATA statistical software (version 14.0, Stata,  
50  
51 222 College Station, Texas, USA). The figures were generated using R software (version  
52  
53 223 3.6.3) with the ‘*forestplot*’ package.  
54

55 224

## 56 225 **Results**

### 57 58 226 *Characteristics of studies and subjects*

59  
60



1  
2  
3  
4 227 In total, 9,798 unique citations were identified in different databases by the literature  
5 228 search (**Figure 1**). We retrieved 661 full-text articles assessed for eligibility after 9,247  
6  
7 229 citations were excluded during title or abstract screening with pre-determined criteria.  
8  
9 230 Finally, there were 241 studies in 240 articles included in the meta-analysis, among  
10  
11 231 which 3 studies were additional records identified through reference lists.  
12

13  
14 232

15 233 The basic characteristics of the included studies are shown in **Supplementary Table**  
16  
17 234 **2**. These characteristics include: cities, countries and study periods in which the  
18  
19 235 ascertained COVID-19 infections were recruited; the number of test-positive and  
20  
21 236 asymptomatic infections; the number of pre-symptomatic infection in patients if  
22  
23 237 available; and demographics of each patient. Approximately 72.9% (175 out of 241) of  
24  
25 238 all included studies were conducted in Asia, 11.7% in the Europe, and 10.42% in  
26  
27 239 America. In terms of study populations, 80.5% were performed in the general adults,  
28  
29 240 12.4% in children and 7.1% in pregnant women, respectively.  
30

31 241

32  
33 242 Quality scores of AXIS for the included studies ranged between 11 and 19 points, with  
34  
35 243 153 studies meeting the criteria of having high quality ( $\geq 16$  points). Overall, 97.9%  
36  
37 244 (235 out of 240) of all studies met the criteria for both reporting aims/objectives and  
38  
39 245 quality design, and the risk factors and outcome variables were appropriate for the  
40  
41 246 studies. In all studies, the methods were clearly defined so that those studies could be  
42  
43 247 repeated, and the presentation of results met the analysis descriptions in the methods  
44  
45 248 with internal consistency (**Supplementary Table 3**).  
46

47 249

#### 48 250 *Asymptomatic ratio estimates*

49  
50 251 A total of 130,123 ascertained COVID-19 infections from 241 studies were finally  
51  
52 252 included in the meta-analysis (**Figure 2**), including 31,411 asymptomatic infections at  
53  
54 253 the time of diagnosis. The rate of asymptomatic infections varied from 0.1% in the  
55  
56 254 general adults in Wuhan, China (21), to 95.6% in the pregnant women in Peru (22). The  
57  
58 255 overall rate of asymptomatic infections was estimated at 23.6% (18.5%-29.1%). The  
59  
60

1  
2  
3  
4 256  $I^2$  equaled to 99.7%, indicating a high heterogeneity among the studies. Of the  
5  
6 257 31,411 asymptomatic infections, 448 (1.4%) developed symptoms after admission.  
7  
8 258 After excluding these pre-symptomatic observations, the pooled rate was 21.7%  
9  
10 259 (16.8%-27.0%) at an  $I^2$  of 99.7%.

11  
12 260  
13  
14 261 In subgroup analysis, we found that pregnant women (48.8%, 28.9%-68.9%;  $I^2 =$   
15  
16 262 96.9%) had a significantly higher asymptomatic infection rate than children  
17  
18 263 (32.1%, 24.2%-40.5%;  $I^2 = 94.4%$ ), whereas the general non-pregnant adults had the  
19  
20 264 lowest asymptomatic rate (20.4%, 15.0%-26.3%;  $I^2 = 99.8%$ ). Regarding age-specific  
21  
22 265 proportion, patients aged  $\leq 18$  years (31.1%, 23.5%-39.2%;  $I^2 = 94.4%$ ) had a  
23  
24 266 significantly higher prevalence of asymptomatic cases than adults aged 19-45 years  
25  
26 267 (26.7%, 19.1%-34.9%;  $I^2 = 99.7%$ ) or  $> 45$  years (15.3%, 10.7%-20.6%;  $I^2 = 97.1%$ ).  
27

28  
29 269 The asymptomatic infection rate was 36.0% (24.6%-48.1%;  $I^2 = 99.8%$ ) among studies  
30  
31 270 for screening settings, which is almost twice of that among studies for non-screening  
32  
33 271 settings (19.4%, 14.3%-24.9%;  $I^2 = 99.6%$ ). Significantly different asymptomatic rates  
34  
35 272 were observed in different geographical regions ( $p$ -value  $< 0.001$ ) - the rate was highest  
36  
37 273 in Africa (64.3%, 56.7%-71.6%;  $I^2 = 96.8%$ ), followed by America (40.0%, 27.4%-  
38  
39 274 53.3%;  $I^2 = 99.6%$ ), and Europe (28.1%, 19.0%-38.1%;  $I^2 = 98.5%$ ). Asia was  
40  
41 275 estimated to have the lowest rate of asymptomatic infection (18.1%, 13.2%-23.5%;  $I^2 =$   
42  
43 276 99.5%). For subgroup analysis by time period, we noted that studies conducted before  
44  
45 277 01 March 2020 reported a pooled asymptomatic infection rate of 13.3% (9.8%-17.1%;  
46  
47 278  $I^2 = 94.2%$ ), while the rate increased sharply to 42.5% (33.4%-51.9%;  
48  
49 279  $I^2 = 99.6%$ ) among studies conducted after 01 March 2020.

50  
51 280  
52  
53 281 All subgroup analysis results were shown in **Figure 3**.

54  
55 282  
56  
57 283 We performed both univariate and multivariate meta-regression analysis to investigate  
58  
59 284 study-level factors that may contribute to the heterogeneity among studies and might  
60

1  
2  
3  
4 285 have influenced our estimations of the asymptomatic infection rate. The results of  
5  
6 286 univariate regression analysis (**Table 1**) demonstrated several significant sources of  
7  
8 287 heterogeneity in the estimated asymptomatic infection rate - studies focused on subjects  
9  
10 288 aging >45 years old ( $p$ -value = 0.015) and were conducted out of Africa ( $p$ -value  $\leq$   
11  
12 289 0.001) are significantly associated with a lower ratio of asymptomatic infection;  
13  
14 290 whereas those using a non-screening study design ( $p$ -value < 0.001), and conducted on  
15  
16 291 or after 01 March 2020 ( $p$ -value < 0.001) tend to report a higher ratio of asymptomatic  
17  
18 292 infection. A screening study design ( $p$ -value = 0.031), geographical region ( $p$ -value <  
19  
20 293 0.001) and time trend ( $p$ -value < 0.001) remained the significant sources of  
21  
22 294 heterogeneity in the multivariate regression analysis.

23  
24  
25 295

26  
27 296 We found no evidence of publication bias among studies by Egger's test with  $p$ -value  
28  
29 297 = 0.414. Sensitivity analysis showed that it was unlikely that any individual study  
30  
31 298 significantly influenced the pooled estimates, demonstrating the robustness and  
32  
33 299 reliability of our estimates (**Supplementary Table 4**).

34  
35 300

## 36 301 **Discussion**

37  
38 302 Our meta-analysis of 130,123 infections in 241 studies performed in 36 countries  
39  
40 303 provides an up-to-date as well as comprehensive overview of asymptomatic infection  
41  
42 304 rate of COVID-19. The estimated rate in our study is 23.6% and 21.7%, before and  
43  
44 305 after excluding pre-symptomatic cases, respectively. There are three key findings in the  
45  
46 306 subgroup analysis (23). First, African studies reported the highest asymptomatic  
47  
48 307 infection rate, while Asian studies reported the lowest. Second, the proportion of  
49  
50 308 asymptomatic carriers was nearly doubled in screening studies than that in non-  
51  
52 309 screening studies. Third, asymptomatic infection rate was more than two times higher  
53  
54 310 in studies conducted in or after 01 March 2020 than those conducted beforehand.

55  
56 311

57  
58 312 Our estimation is higher than some existing meta-analysis which reported a ratio  
59  
60 313 between 15.6% to 20% (24, 25). One possible explanation is that the included studies

1  
2  
3  
4 314 in previous meta-analysis were dominated by that conducted during the early course of  
5  
6 315 the pandemic and in China or the US, where the asymptomatic ratio is lower than other  
7  
8 316 regions. However, our study included more than 200 articles, resulting in a more precise  
9  
10 317 estimation with significantly narrower confidence interval. With a much larger dataset,  
11  
12 318 we conducted more subgroup analysis which resulted in more implications.

13  
14 319

15 320 In the subgroup analysis, we noted a large variety of asymptomatic rates among  
16  
17 321 different populations. For instance, children and adults aged  $\leq 45$  years old tended to  
18  
19 322 have a significantly higher rate. The inverse correlation between age and symptom  
20  
21 323 severity has also been reported and discussed by a few studies, and the prevalence of  
22  
23 324 chronic diseases was considered as the risk factors of symptomatic infection (23, 26,  
24  
25 325 27). Nevertheless, a multi-center study in China noted that more than half of the  
26  
27 326 asymptomatic children had lung injuries, although the injuries were usually less severe  
28  
29 327 than that among the adults. Infection control measures may be targeted on the early  
30  
31 328 detection and isolation of asymptomatic youth, as the young asymptomatic carriers are  
32  
33 329 of higher probability to bring in community transmission due to their more socially  
34  
35 330 active lifestyle habits with more frequent travelling than people in other age groups (26).

36  
37 331

38 332 We also noted that the asymptomatic infection rate for pregnant women (48.8%) is  
39  
40 333 more than two times that for the general adults (20.4%). Previous study suggested  
41  
42 334 cytotoxic cells may be poised to control virus load, and hence affect the disease severity  
43  
44 335 during pregnancy (28). Case reports from the New York hospital reported a similarly  
45  
46 336 high rate (14 women, 32.6%) at presentation, yet 71.4% (10 women) of the  
47  
48 337 asymptomatic mothers developed symptoms during their hospitalization and  
49  
50 338 postpartum course (29). Nevertheless, we noted that 15 out of our 17 included studies  
51  
52 339 on pregnant women are cross-sectional studies that in which the high proportion of  
53  
54 340 asymptomatic infections may include both pre-symptomatic and asymptomatic cases.  
55  
56 341 More follow-up studies among the pregnant women are needed before drawing further  
57  
58 342 conclusions. Undetected asymptomatic pregnant women may lead to more severe

1  
2  
3  
4 343 consequences. Without early detection and proper preventive measures, the delivery of  
5 344 asymptomatic patients brings extra risks to nosocomial infection, and may also result  
6  
7 345 in droplet transmission among the women, kids, as well as other family members (30).  
8  
9 346 Importantly, the data suggest that the severity and mortality risk of hospital  
10  
11 347 transmission may be greater than that of community-acquired COVID-19 (31).  
12

13 348

14  
15 349 To our knowledge, this is the first meta-analysis that compared the asymptomatic  
16  
17 350 infection rate in different continents. Previous meta-analysis only concluded that  
18  
19 351 population in Asia may have a lower asymptomatic ratio, while did not explored the  
20  
21 352 differences among other continents (32). Our results also showed that estimated ratio  
22  
23 353 in Asia is the lowest among all continents. Possible explanations were summarized in  
24  
25 354 a published meta-analysis, from the perspectives of infection control policies and host  
26  
27 355 characteristics (32). Meanwhile, the rates in Africa (64.3%) were the highest among all  
28  
29 356 continents, although the limited number of subjects (20,271 COVID-19 infections) in  
30  
31 357 African studies reminded us to think twice before generalizing the results. The  
32  
33 358 phenomenon may be partly explained by a few factors in African patients, including  
34  
35 359 the generally younger age, the lower proportion of chronic disease patients and elderlies  
36  
37 360 living in nursing homes, and the higher serum Vitamin D levels due to rich sun exposure  
38  
39 361 (33). Despite the higher asymptomatic ratio, it is noted that Africa is the continent with  
40  
41 362 the lowest RT-PCR testing rate as well as the lowest vaccination rate. The high  
42  
43 363 proportion of asymptomatic rate may further hinder the timely detection and control of  
44  
45 364 COVID-19 infections.

46 365

47  
48 366 We noted that the asymptomatic infection rate was nearly doubled in screening studies  
49  
50 367 than that in non-screening studies. One possible explanation is that people may get  
51  
52 368 tested for varied reasons associated with the social, cultural, and political factors in each  
53  
54 369 region. For instance, frontline health workers and people with a history of exposure  
55  
56 370 were in general more likely to be reported in screening programmes, while the samples  
57  
58 371 in non-screening studies were likely to be dominated by subjects having severe  
59  
60

1  
2  
3  
4 372 symptoms requiring hospitalization (34). If we consider the rate as a constant, the higher  
5  
6 373 asymptomatic infection rate estimates were likely due to higher probabilities of  
7  
8 374 ascertaining asymptomatic COVID-19 infections in the community with screening  
9  
10 375 implemented. This implies the importance of mass screening in detecting the infections,  
11  
12 376 which is of importance in community infection control. Increasing the accessibility and  
13  
14 377 affordability of community testing could be an important surveillance strategy for early  
15  
16 378 containment of diagnosed cases (35).

17  
18 379

19 380 We also found that the pooled asymptomatic infection rate increased from 13.3% (95%  
20  
21 381 CI: 9.8%-17.1%) for studies conducted before 01 March 2020, to 42.5% (33.4%-51.9%)  
22  
23 382 for studies conducted on 01 March 2020 or afterwards, although the 95% CI is larger  
24  
25 383 in the latter time period. This timeline is highly consistent with a previous study using  
26  
27 384 the publicly released from the Centre for Health Protection in Hong Kong (36). The  
28  
29 385 increased rate may be due to overlooking of asymptomatic, especially pre-symptomatic  
30  
31 386 cases at the early stage of the pandemic, when medical resources were targeted to  
32  
33 387 patients with severe symptoms. Later, with increased public awareness and test  
34  
35 388 accessibility, more COVID-19 infected individuals without symptoms were detected,  
36  
37 389 while more and more studies reported the proportion of asymptomatic patients. In this  
38  
39 390 context, future studies may explore whether the proportion of COVID-19 infections  
40  
41 391 with mild or no symptoms is increasing, especially when considering the SARS-CoV-  
42  
43 392 2 variant with D replaced by G at the 614-th codon in the Spike protein which  
44  
45 393 dominated the pandemic since late February 2020 (6, 37, 38).

46  
47 394

48 395 This study has limitations. First, our pooled asymptomatic infection rates were found  
49  
50 396 to have a high level of heterogeneity ( $I^2 = 96.2\%$ ). This could be attributed to the  
51  
52 397 difficulties in generating the exact number of infections and asymptomatic cases during  
53  
54 398 an outbreak. Although we conducted subgroup analysis and meta-regression to figure  
55  
56 399 out the source of heterogeneity, some unobserved factors which have not be included  
57  
58 400 in the original studies may lead to the high heterogeneity, such as changing pandemic

1  
2  
3  
4 401 control measures in some countries; the diverse definition of asymptomatic infection,  
5  
6 402 varying practices of surveillance and ascertainment of asymptomatic infection; as well  
7  
8 403 as meteorological disparities across time and regions. Nevertheless, previous studies  
9  
10 404 indicated that any amount of heterogeneity is acceptable if both accurate data and  
11  
12 405 predefined eligibility criteria were provided (39, 40). Second, we followed the WHO  
13  
14 406 definition of COVID-19 infection and only included infections detected by RT-PCR,  
15  
16 407 while the availability of RT-PCR is restricted in many countries (41). Increasing  
17  
18 408 number of studies reported the results of antibody-based rapid diagnostic tests, yet they  
19  
20 409 were not included in our meta-analysis. Third, our meta-analysis focused on real-world  
21  
22 410 evidence and observational studies, in which subjects with more severe and easily  
23  
24 411 recognized symptoms are more likely to be selected. The collider bias caused by non-  
25  
26 412 representative sampling strategies (such as sampling conditional on testing and  
27  
28 413 prognosis conditional on hospitalization) in existing observational studies on COVID-  
29  
30 414 19 has been deeply discussed in (34). Forth, cross-sectional studies included in this  
31  
32 415 review might mis-classified pre-symptomatic cases as ‘asymptomatic’, hence result in  
33  
34 416 a certain degree of overestimation on the asymptomatic infection rate. With additional  
35  
36 417 information of the exposure and reporting dates of each case, we remark our estimation  
37  
38 418 can be extended to a right censoring version to further address some potential bias in  
39  
40 419 the existing frameworks (12).

40  
41  
42  
43  
44  
45  
46  
47  
48  
49  
50  
51  
52  
53  
54  
55  
56  
57  
58  
59  
60

## 421 **Conclusions**

422 We estimated the asymptomatic infection rate of 23.6%, which decreased to 21.7%  
423 after excluding pre-symptomatic cases. Subgroup analysis indicates that pregnant  
424 women, children, African residents, screening programmes, and studies conducted after  
425 01 March 2020 had higher asymptomatic infection rates. Our findings provide further  
426 insights on the distribution of asymptomatic COVID-19 infections in different groups  
427 of individuals, which bear significance on public health policies that aim to achieve  
428 early identification and more stringent containment of the pandemic.

429

1  
2  
3 430 ***Declarations***

4 431 ***Patient and Public Involvement***

5 432 Not applicable.

6 433 ***Ethics approval and consent to participate***

7 434 Not applicable.

8 435 ***Availability of materials***

9 436 All data relevant to the study are included in the article or uploaded as supplementary  
10 437 information.

11 438 ***Consent for publication***

12 439 Not applicable.

13 440 ***Funding***

14 441 This study was funded by The Key Project of Medicine Discipline of Guangzhou  
15 442 (2017–2019-07). DH was supported by General Research Fund (15205119) of  
16 443 Research Grants Council of Hong Kong and Alibaba (China) Co. Ltd. Collaborative  
17 444 Research grant.

18 445 ***Acknowledgements***

19 446 We thank Ms. Maggie Choi, Librarian from Li Ping Library, The Chinese University  
20 447 of Hong Kong, for her valuable help in developing our search strategy.

21 448 ***Disclaimer***

22 449 The funding agencies had no role in the design and conduct of the study; collection,  
23 450 management, analysis, and interpretation of the data; preparation, review, or approval  
24 451 of the manuscript; or decision to submit the manuscript for publication.

25 452 ***Conflict of interests***

26 453 DH received a grant from Alibaba (China) Co. Ltd., Collaborative Research grant.  
27 454 Other authors declared no conflict of interest.

28 455 ***Author's contributions***

29 456 XC and ZH designed the study and searched the literature. XC, ZH, and JW extracted  
30 457 the data and evaluated the quality. XC conducted the statistical analysis. XC, ZH, and  
31 458 JW wrote the full manuscript. SZ, MSCW, MKCC, DH, and JL provided critical



1  
2  
3  
4  
5  
6  
7  
8  
9  
10  
11  
12  
13  
14  
15  
16  
17  
18  
19  
20  
21  
22  
23  
24  
25  
26  
27  
28  
29  
30  
31  
32  
33  
34  
35  
36  
37  
38  
39  
40  
41  
42  
43  
44  
45  
46  
47  
48  
49  
50  
51  
52  
53  
54  
55  
56  
57  
58  
59  
60

459 revision of the manuscript for important intellectual content. All authors discussed the  
460 results, and approved the final version of the manuscript for publication.

461

For peer review only

**References:**

1. Chan JF-W, Yuan S, Kok K-H, To KK-W, Chu H, Yang J, et al. A familial cluster of pneumonia associated with the 2019 novel coronavirus indicating person-to-person transmission: a study of a family cluster. *The lancet*. 2020;395(10223):514-23.
2. Team EE. Note from the editors: World Health Organization declares novel coronavirus (2019-nCoV) sixth public health emergency of international concern. *Eurosurveillance*. 2020;25(5):200131e.
3. Zhao S, Lin Q, Ran J, Musa SS, Yang G, Wang W, et al. Preliminary estimation of the basic reproduction number of novel coronavirus (2019-nCoV) in China, from 2019 to 2020: A data-driven analysis in the early phase of the outbreak. *International journal of infectious diseases*. 2020;92:214-7.
4. Zou L, Ruan F, Huang M, Liang L, Huang H, Hong Z, et al. SARS-CoV-2 viral load in upper respiratory specimens of infected patients. *New England Journal of Medicine*. 2020;382(12):1177-9.
5. Lee S, Kim T, Lee E, Lee C, Kim H, Rhee H, et al. Clinical course and molecular viral shedding among asymptomatic and symptomatic patients with SARS-CoV-2 infection in a community treatment center in the Republic of Korea. *JAMA internal medicine*. 2020;180(11):1447-52.
6. Chen X, Pan Z, Yue S, Yu F, Zhang J, Yang Y, et al. Disease severity dictates SARS-CoV-2-specific neutralizing antibody responses in COVID-19. *Signal transduction and targeted therapy*. 2020;5(1):180.
7. Bai Y, Yao L, Wei T, Tian F, Jin D-Y, Chen L, et al. Presumed asymptomatic carrier transmission of COVID-19. *Jama*. 2020;323(14):1406-7.
8. Hoehl S, Rabenau H, Berger A, Kortenbusch M, Cinatl J, Bojkova D, et al. Evidence of SARS-CoV-2 infection in returning travelers from Wuhan, China. *New England Journal of Medicine*. 2020;382(13):1278-80.
9. Pan Y, Yu X, Du X, Li Q, Li X, Qin T, et al. Epidemiological and clinical characteristics of 26 asymptomatic severe acute respiratory syndrome coronavirus 2 carriers. *The Journal of infectious diseases*. 2020;221(12):1940-7.
10. Lauer SA, Grantz KH, Bi Q, Jones FK, Zheng Q, Meredith HR, et al. The incubation period of coronavirus disease 2019 (COVID-19) from publicly reported confirmed cases: estimation and application. *Annals of internal medicine*. 2020;172(9):577-82.
11. Chen Y, Wang A, Yi B, Ding K, Wang H, Wang J, et al. Epidemiological characteristics of infection in COVID-19 close contacts in Ningbo city. *Zhonghua liu Xing Bing xue za zhi= Zhonghua Liuxingbingxue Zazhi*. 2020;41(5):667-71.
12. Mizumoto K, Kagaya K, Zarebski A, Chowell G. Estimating the asymptomatic proportion of coronavirus disease 2019 (COVID-19) cases on board the Diamond Princess cruise ship, Yokohama, Japan, 2020. *Eurosurveillance*. 2020;25(10):2000180.
13. Gao W, LM L. Research progress on the incubation period of new coronavirus pneumonia or the transmission of recessive infections. *Chinese Journal of Epidemiology*. 2020;41 (4):485-8.
14. Moher D, Liberati A, Tetzlaff J, Altman DG, Group P. Preferred reporting items for systematic reviews and meta-analyses: the PRISMA statement. *PLoS medicine*. 2009;6(7):e1000097.
15. Commission SMh. The collection of outbreak situation reports of COVID-19 in shenzhen, Shenzhen Munciple health Commission 2020 [Available from: <http://wjw.sz.gov.cn/yqxx/>].
16. TPsGoB M. Notice of the State Council on the Joint Prevention and Control Mechanism for the Prevention and Control of the Novel Coronavirus Infection and Pneumonia Epidemic on Issuing the Regulations for the Management of Asymptomatic Patients with the New Coronavirus 2020 [Available

- 1  
2  
3 505 from: [http://www.beijing.gov.cn/zhengce/zhengcefagui/202004/t20200409\\_1798158.html](http://www.beijing.gov.cn/zhengce/zhengcefagui/202004/t20200409_1798158.html).
- 4 506 17. Varghese GM, John R, Manesh A, Karthik R, Abraham O. Clinical management of COVID-19.  
5 507 The Indian Journal of Medical Research. 2020;151(5):401.
- 6 508 18. Downes MJ, Brennan ML, Williams HC, Dean RS. Development of a critical appraisal tool to  
7 509 assess the quality of cross-sectional studies (AXIS). *BMJ open*. 2016;6(12):e011458.
- 8 510 19. Marsh A, Eslick EM, Eslick GD. Does a diet low in FODMAPs reduce symptoms associated with  
9 511 functional gastrointestinal disorders? A comprehensive systematic review and meta-analysis. *European*  
10 512 *journal of nutrition*. 2016;55(3):897-906.
- 11 513 20. Duval S, Tweedie R. Trim and fill: a simple funnel-plot-based method of testing and adjusting for  
12 514 publication bias in meta-analysis. *Biometrics*. 2000;56(2):455-63.
- 13 515 21. Ji T, Chen H-L, Xu J, Wu L-N, Li J-J, Chen K, et al. Lockdown contained the spread of 2019 novel  
14 516 coronavirus disease in Huangshi city, China: Early epidemiological findings. *Clinical Infectious Diseases*.  
15 517 2020;71(6):1454-60.
- 16 518 22. Grados IZ, Paredes RL, Benavides G. Characteristics of SARS-CoV-2 infection in pregnant and  
17 519 puerperal women at Callao national hospital, Peru.
- 18 520 23. Interim Clinical Guidance for Management of Patients with Confirmed Coronavirus Disease  
19 521 (COVID-19). Centers for Disease Control and Prevention; 2020 [Available from:  
20 522 <https://www.cdc.gov/coronavirus/2019-ncov/hcp/clinical-guidance-management-patients.html>].
- 21 523 24. Byambasuren O, Cardona M, Bell K, Clark J, McLaws M-L, Glasziou P. Estimating the extent of  
22 524 asymptomatic COVID-19 and its potential for community transmission: systematic review and meta-  
23 525 analysis. *Official Journal of the Association of Medical Microbiology and Infectious Disease Canada*.  
24 526 2020;5(4):223-34.
- 25 527 25. Cai J, Sun W, Huang J, Gamber M, Wu J, He G. Clinical features and the treatment of children with  
26 528 COVID-19: A case series from Wenzhou, China. *J Med Virol*. 2020;92(11):2403-5.
- 27 529 26. Zhang S, Xu Y, Li J, Wu K, Wang T, Su X, et al. Symptomless multi-variable apnea prediction  
28 530 index assesses adverse outcomes in patients with Corona Virus Disease 2019. *Sleep medicine*.  
29 531 2020;75:294-300.
- 30 532 27. Du W, Yu J, Wang H, Zhang X, Zhang S, Li Q, et al. Clinical characteristics of COVID-19 in  
31 533 children compared with adults in Shandong Province, China. *Infection*. 2020;48(3):445-52.
- 32 534 28. Edlow AG, Li JZ, Ai-ris YC, Atyeo C, James KE, Boatman AA, et al. Assessment of Maternal and  
33 535 Neonatal SARS-CoV-2 Viral Load, Transplacental Antibody Transfer, and Placental Pathology in  
34 536 Pregnancies During the COVID-19 Pandemic. *JAMA network open*. 2020;3(12):e2030455-e.
- 35 537 29. Breslin N, Baptiste C, Gyamfi-Bannerman C, Miller R, Martinez R, Bernstein K, et al. Coronavirus  
36 538 disease 2019 infection among asymptomatic and symptomatic pregnant women: two weeks of confirmed  
37 539 presentations to an affiliated pair of New York City hospitals. *American journal of obstetrics &*  
38 540 *gynecology MFM*. 2020;2(2):100118.
- 39 541 30. Breslin N, Baptiste C, Gyamfi-Bannerman C, Miller R, Martinez R, Bernstein K, et al. Coronavirus  
40 542 disease 2019 infection among asymptomatic and symptomatic pregnant women: two weeks of confirmed  
41 543 presentations to an affiliated pair of New York City hospitals. *American journal of obstetrics &*  
42 544 *gynecology MFM*. 2020;2(2):100118.
- 43 545 31. McMichael TM, Currie DW, Clark S, Pogosjans S, Kay M, Schwartz NG, et al. Epidemiology of  
44 546 Covid-19 in a long-term care facility in King County, Washington. *New England Journal of Medicine*.  
45 547 2020;382(21):2005-11.
- 46 548 32. Chen C, Zhu C, Yan D, Liu H, Li D, Zhou Y, et al. The epidemiological and radiographical

- 1  
2  
3 549 characteristics of asymptomatic infections with the novel coronavirus (COVID-19): A systematic review  
4 550 and meta-analysis. *Int J Infect Dis.* 2021;104:458-64.
- 5 551 33. Bamgboye EL, Omiye JA, Afolaranmi OJ, Davids MR, Tannor EK, Wadee S, et al. COVID-19  
6 552 Pandemic: Is Africa Different? *Journal of the National Medical Association.* 2020.
- 7 553 34. Griffith GJ, Morris TT, Tudball MJ, Herbert A, Mancano G, Pike L, et al. Collider bias undermines  
8 554 our understanding of COVID-19 disease risk and severity. *Nature communications.* 2020;11(1):5749.
- 9 555 35. Padula WV. Why only test symptomatic patients? consider random screening for covid-19. Springer;  
10 556 2020.
- 11 557 36. Tao J, Zhang X, Zhang X, Zhao S, Yang L, He D, et al. The time serial distribution and influencing  
12 558 factors of asymptomatic COVID-19 cases in Hong Kong. *One Health.* 2020.
- 13 559 37. Korber B, Fischer WM, Gnanakaran S, Yoon H, Theiler J, Abfalterer W, et al. Tracking changes in  
14 560 SARS-CoV-2 Spike: evidence that D614G increases infectivity of the COVID-19 virus. *Cell.*  
15 561 2020;182(4):812-27. e19.
- 16 562 38. Meng F, Xu R, Wang S, Xu Z, Zhang C, Li Y, et al. Human umbilical cord-derived mesenchymal  
17 563 stem cell therapy in patients with COVID-19: a phase 1 clinical trial. *Signal transduction and targeted*  
18 564 *therapy.* 2020;5(1):172.
- 19 565 39. Higgins JP. Commentary: Heterogeneity in meta-analysis should be expected and appropriately  
20 566 quantified. *International journal of epidemiology.* 2008;37(5):1158-60.
- 21 567 40. Zhu J, Ji P, Pang J, Zhong Z, Li H, He C, et al. Clinical characteristics of 3062 COVID-19 patients:  
22 568 a meta-analysis. *Journal of medical virology.* 2020;92(10):1902-14.
- 23 569 41. Boum Y, Fai KN, Nikolay B, Mboringong AB, Bebell LM, Ndifon M, et al. Performance and  
24 570 operational feasibility of antigen and antibody rapid diagnostic tests for COVID-19 in symptomatic and  
25 571 asymptomatic patients in Cameroon: a clinical, prospective, diagnostic accuracy study. *The Lancet*  
26 572 *Infectious Diseases.* 2021.
- 27 573  
28 574  
29  
30  
31  
32  
33  
34  
35  
36  
37  
38  
39  
40  
41  
42  
43  
44  
45  
46  
47  
48  
49  
50  
51  
52  
53  
54  
55  
56  
57  
58  
59  
60

1  
2  
3  
4 575 **Tables and Figures Legends**

5 576 **Table 1** Results of univariate and multivariate meta-regression analysis

7 577 **Figure 1** The process of study selection for the meta-analysis

9 578 **Figure 2** Meta-analysis of the asymptomatic ratio among ascertained COVID-19  
11 infections (including and excluding pre-symptomatic infections)

13 580 **Figure 3** Asymptomatic ratio among ascertained COVID-19 infections by patient  
15 group, age group, screening study, region, and time trend

17 582 **Supplementary Table 1** Search strategy for systematic review

19 583 **Supplementary Table 2** Characteristics of the studies included for meta-analysis

21 584 **Supplementary Table 3** Quality assessment of selected articles

23 585 **Supplementary Table 4** Results of sensitivity analysis  
24  
25  
26  
27  
28  
29  
30  
31  
32  
33  
34  
35  
36  
37  
38  
39  
40  
41  
42  
43  
44  
45  
46  
47  
48  
49  
50  
51  
52  
53  
54  
55  
56  
57  
58  
59  
60

**Table 1 Results of Univariate and Multivariate Meta-regression Analysis**

| Variable              | Univariate Regression Analysis |               |               | Multivariate Regression Analysis |                  |               |                 |
|-----------------------|--------------------------------|---------------|---------------|----------------------------------|------------------|---------------|-----------------|
|                       | No. of Studies (%)             | Crude Meta-RR | 95% CI        | <i>p</i> -value                  | Adjusted Meta-RR | 95% CI        | <i>p</i> -value |
| <b>Patient Group</b>  |                                |               |               |                                  |                  |               |                 |
| Children              | 30 (12.45%)                    | 1 (Reference) | 1 (Reference) |                                  | 1 (Reference)    | 1 (Reference) |                 |
| Pregnant              | 17 (7.05%)                     | 1.16          | (0.99-1.37)   | 0.074                            | 1.02             | (0.75-1.10)   | 0.901           |
| Adults                | 194 (80.50%)                   | 0.91          | (0.82-1.00)   | 0.057                            | 0.83             | (0.63-1.11)   | 0.209           |
| <b>Age</b>            |                                |               |               |                                  |                  |               |                 |
| ≤18y                  | 30 (12.45%)                    | 1 (Reference) | 1 (Reference) |                                  | 1 (Reference)    | 1 (Reference) |                 |
| 19-45y                | 102 (42.32%)                   | 0.98          | (0.88-1.09)   | 0.682                            | 1.12             | (0.84-1.48)   | 0.446           |
| >45y                  | 68 (27.39%)                    | 0.87          | (0.77-0.97)   | 0.015                            | 1.09             | (0.82-1.45)   | 0.539           |
| NM                    | 43 (17.84%)                    | 0.93          | (0.83-1.05)   | 0.252                            | 1.13             | (0.85-1.49)   | 0.393           |
| <b>Screening</b>      |                                |               |               |                                  |                  |               |                 |
| Non-screening studies | 176 (73.03%)                   | 1 (Reference) | 1 (Reference) |                                  | 1 (Reference)    | 1 (Reference) |                 |
| Screening studies     | 65 (26.97%)                    | 1.16          | (1.08 -1.25)  | <0.001                           | 1.08             | (1.01-1.17)   | 0.031           |
| <b>Region</b>         |                                |               |               |                                  |                  |               |                 |
| Africa                | 12 (5.00%)                     | 1 (Reference) | 1 (Reference) |                                  | 1 (Reference)    | 1 (Reference) |                 |
| America               | 25 (10.42%)                    | 0.78          | (0.67-0.90)   | 0.001                            | 0.71             | (0.62-0.82)   | <0.001          |
| Asia                  | 175 (72.92%)                   | 0.64          | (0.56-0.72)   | <0.001                           | 0.78             | (0.68-0.89)   | <0.001          |
| Europe                | 28 (11.67%)                    | 0.71          | (0.62-0.82)   | <0.001                           | 0.69             | (0.60-0.78)   | <0.001          |
| <b>Time Trend</b>     |                                |               |               |                                  |                  |               |                 |
| Before March 2020     | 95 (39.42%)                    | 1 (Reference) | 1 (Reference) |                                  | 1 (Reference)    | 1 (Reference) |                 |
| March 2020 afterwards | 68 (28.22%)                    | 1.33          | (1.24-1.43)   | <0.001                           | 1.29             | (1.17-1.43)   | <0.001          |
| NM                    | 78 (32.37%)                    | 1.07          | (1.00-1.14)   | 0.092                            | 1.05             | (0.98-1.12)   | 0.158           |
| NM, not mentioned.    |                                |               |               |                                  |                  |               |                 |

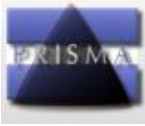

## PRISMA 2009 Flow Diagram

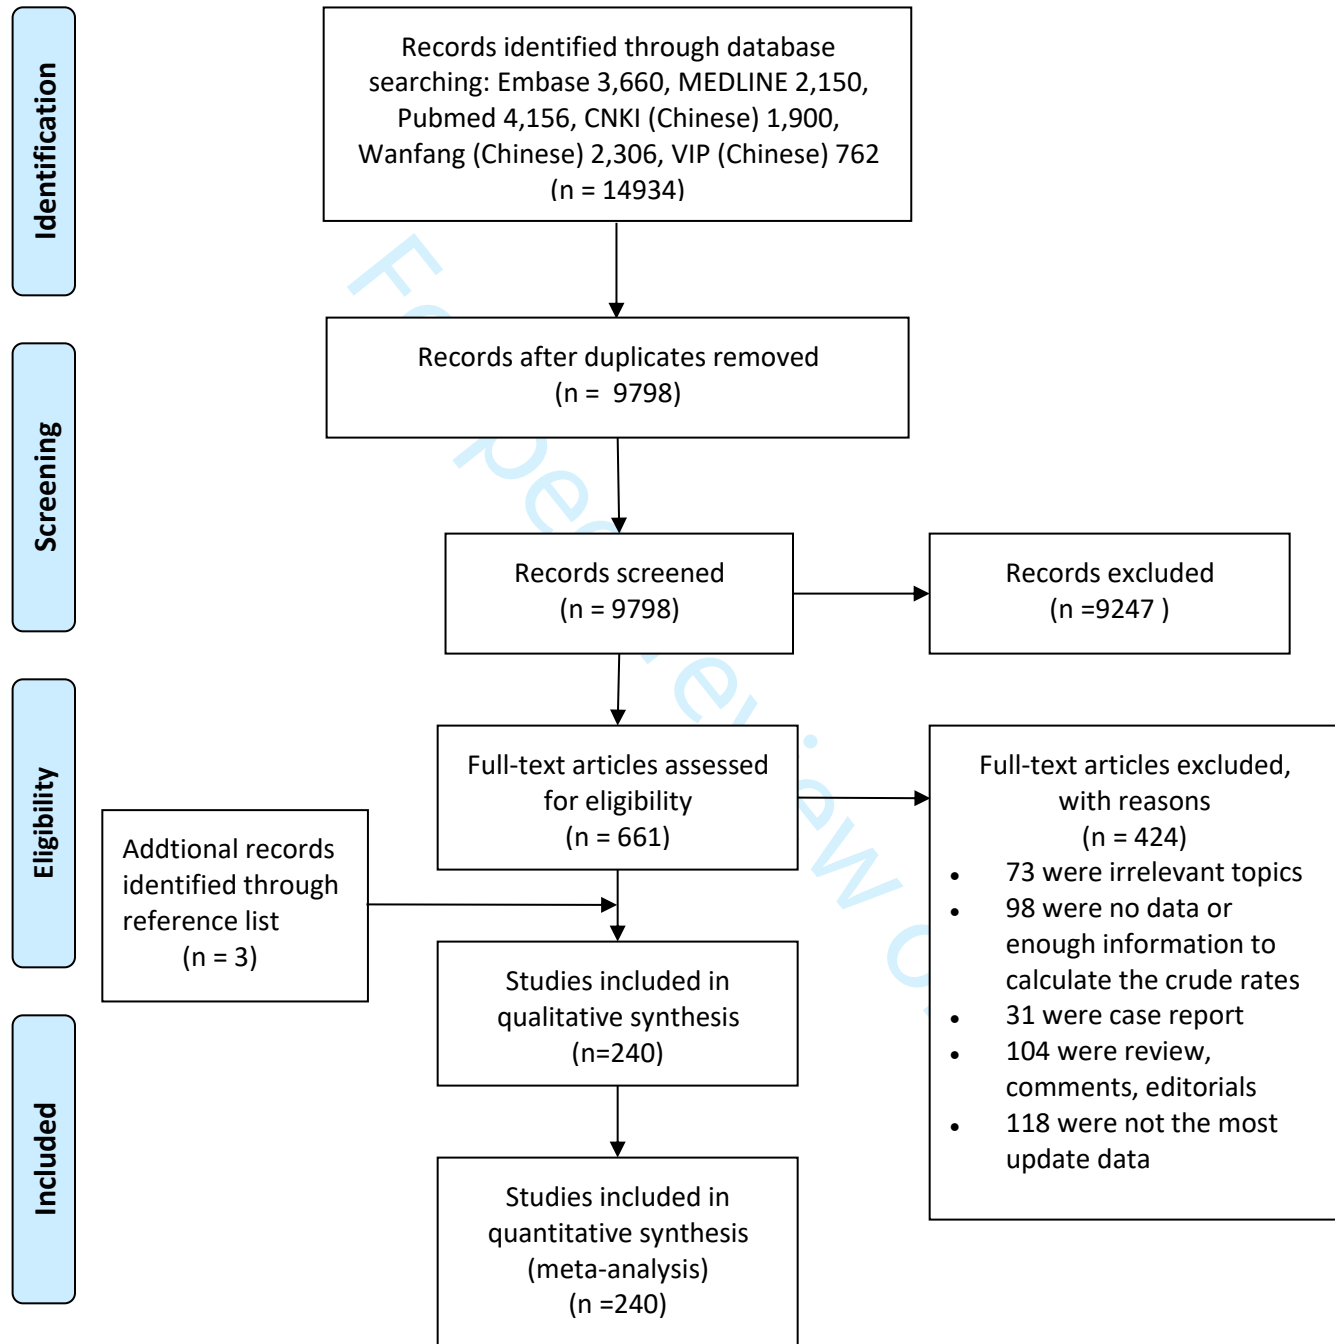

From: Moher D, Liberati A, Tetzlaff J, Altman DG, The PRISMA Group (2009). Preferred Reporting Items for Systematic Reviews and Meta-Analyses: The PRISMA Statement. PLoS Med 6(7): e1000097. doi:10.1371/journal.pmed1000097

For more information, visit [www.prisma-statement.org](http://www.prisma-statement.org).

For peer review only - <http://bmjopen.bmj.com/site/about/guidelines.xhtml>

Figure 2 Meta-analysis of the asymptomatic ratio among COVID-19 patients (including and excluding pre-symptomatic infections)

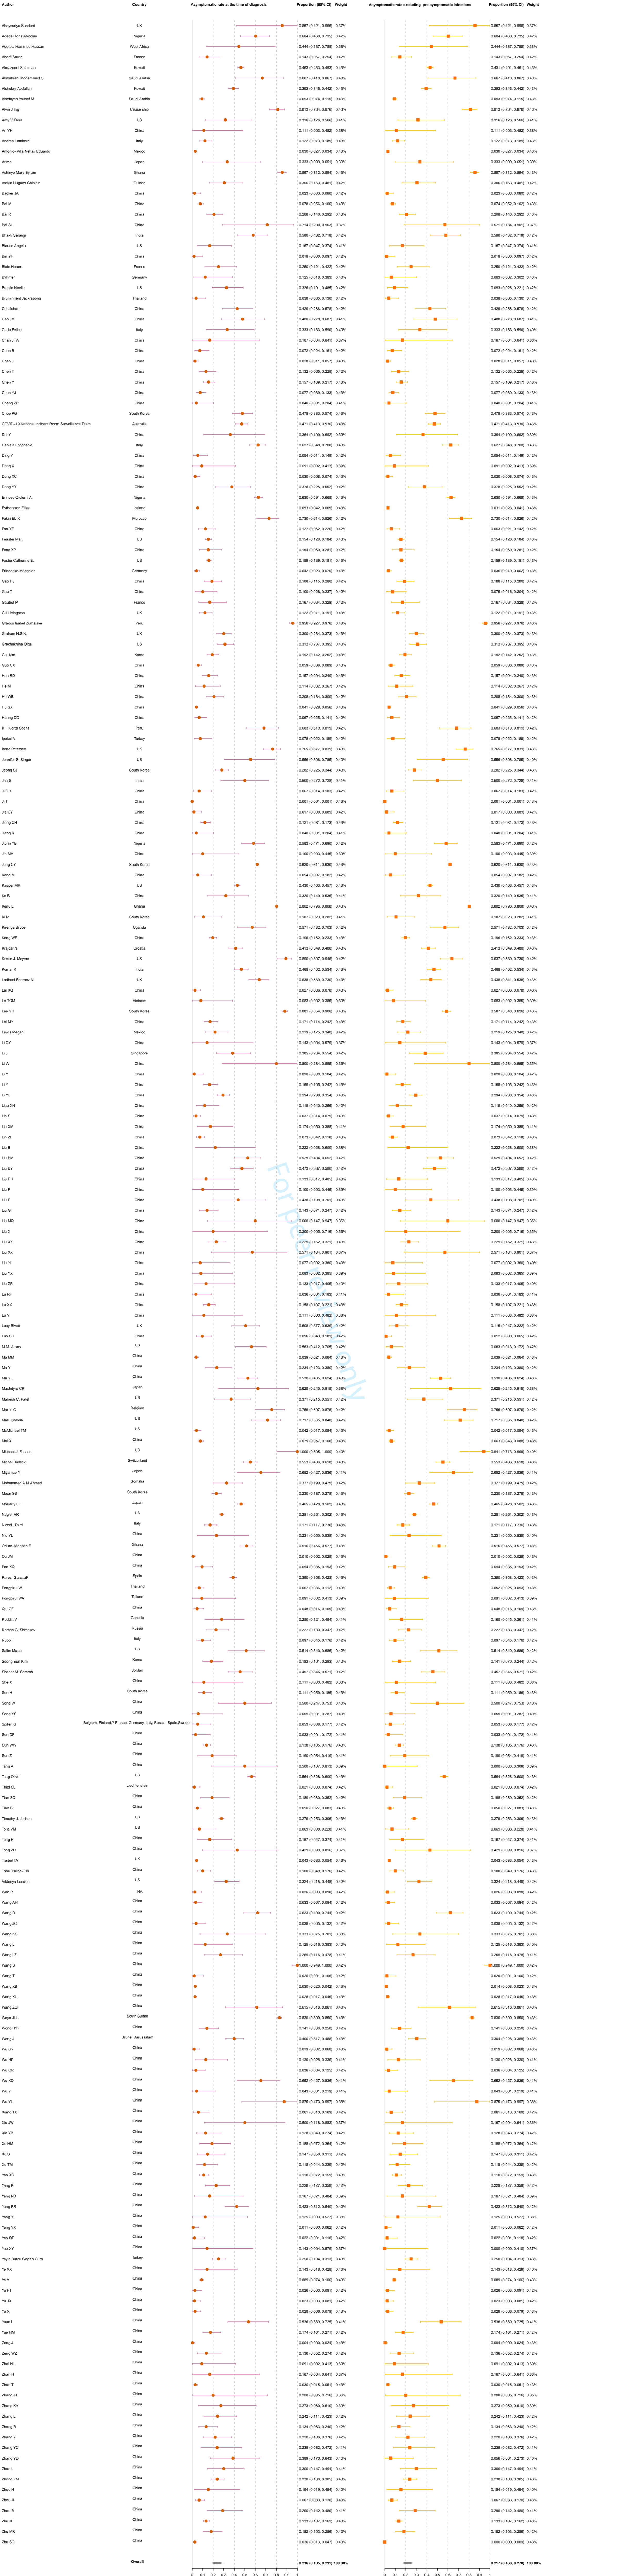



Figure 3 Asymptomatic ratio among COVID-19 patients by patient group, age group, screening study, region, and time trend

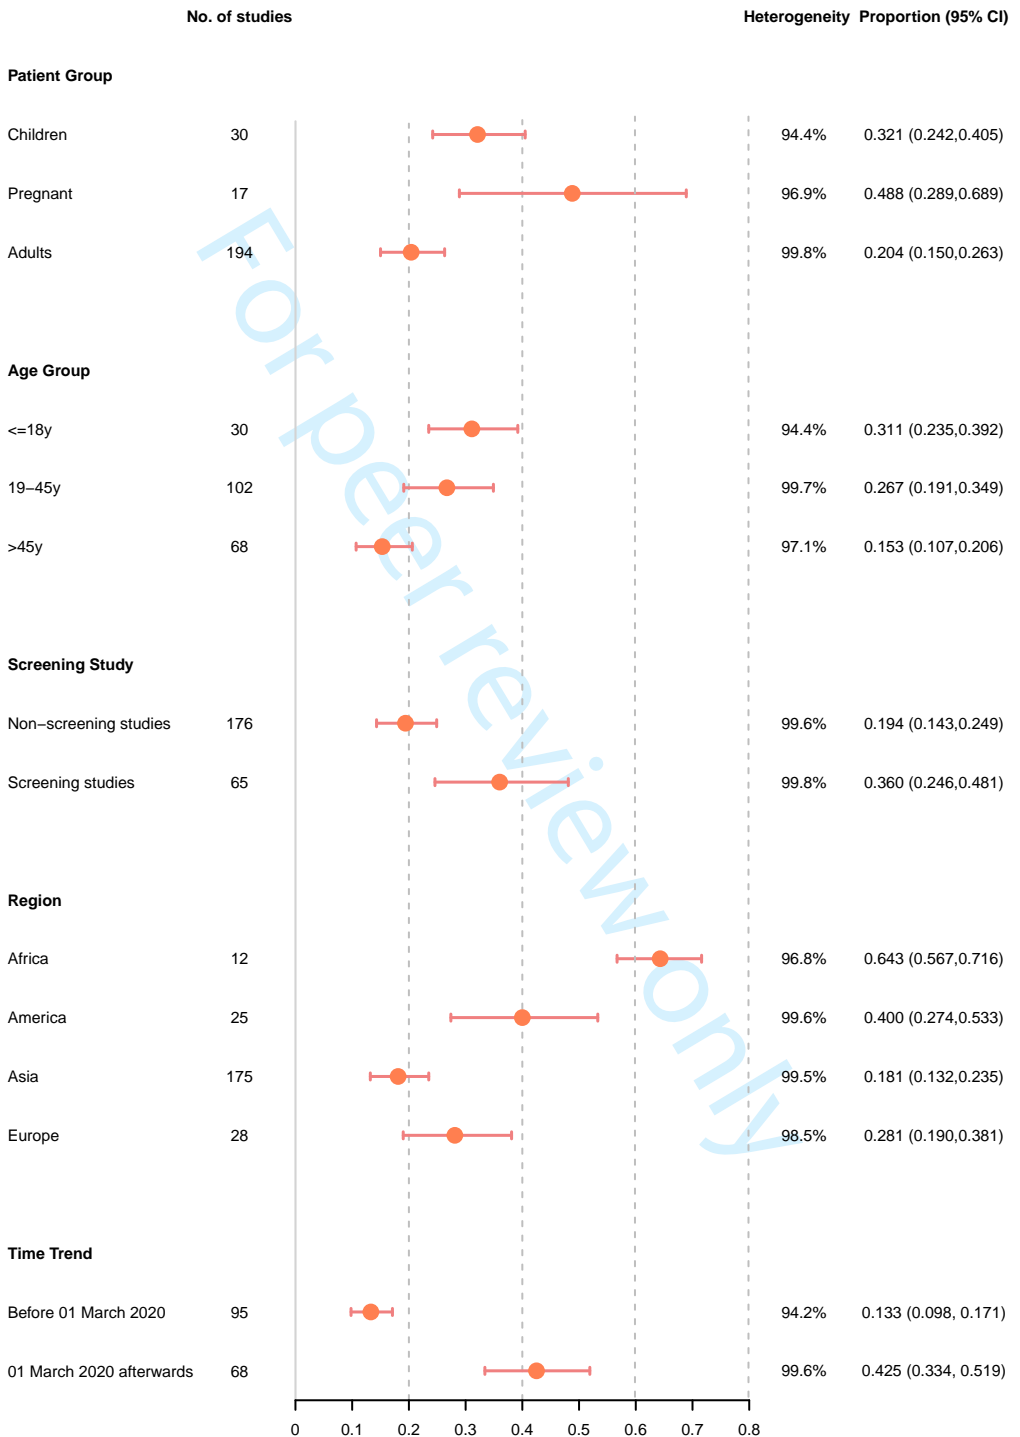

1  
2  
3  
4 **Supplementary Tables and Figure Legends**

5 **Supplementary Table 1** Search strategy for systematic review

6  
7 **Supplementary Table 2** Characteristics of the studies included for meta-analysis

8  
9 **Supplementary Table 3** Quality assessment of selected articles

10  
11 **Supplementary Table 4** Results of sensitivity analysis

12  
13  
14  
15  
16  
17  
18  
19  
20  
21  
22  
23  
24  
25  
26  
27  
28  
29  
30  
31  
32  
33  
34  
35  
36  
37  
38  
39  
40  
41  
42  
43  
44  
45  
46  
47  
48  
49  
50  
51  
52  
53  
54  
55  
56  
57  
58  
59  
60

For peer review only

**Supplementary Table 1 Search strategy for systematic review**  
**Medline (n=2,150)**

| # ▲ | Searches                                              | Results |
|-----|-------------------------------------------------------|---------|
| 1   | SARS-CoV-2.tw.                                        | 22572   |
| 2   | COVID-19.tw.                                          | 68487   |
| 3   | 2019-nCoV.tw.                                         | 811     |
| 4   | novel coronavirus.tw.                                 | 4999    |
| 5   | coronavirus 2019.tw.                                  | 928     |
| 6   | 2019 coronavirus.tw.                                  | 368     |
| 7   | Wuhan coronavirus.tw.                                 | 15      |
| 8   | Wuhan pneumonia.tw.                                   | 8       |
| 9   | COVID 19.tw.                                          | 68487   |
| 10  | Coronavirus Disease-19.tw.                            | 716     |
| 11  | SARS Coronavirus 2 Infection.tw.                      | 4       |
| 12  | 1 or 2 or 3 or 4 or 5 or 6 or 7 or 8 or 9 or 10 or 11 | 75773   |
| 13  | Asymptomatic.tw.                                      | 140452  |
| 14  | Asymptomatic Carrier*.tw.                             | 3332    |
| 15  | Asymptomatic positive*.tw.                            | 45      |
| 16  | No symptom*.tw.                                       | 8151    |
| 17  | No sign*.tw.                                          | 655183  |
| 18  | Asymptomatic individual*.tw.                          | 3748    |
| 19  | Asymptomatic person*.tw.                              | 742     |
| 20  | Asymptomatic patient*.tw.                             | 14504   |
| 21  | Asymptomatic case*.tw.                                | 1406    |
| 22  | Asymptomatic carriage.tw.                             | 560     |
| 23  | Asymptomatic proportion.tw.                           | 9       |

|    |    |                                                                                               |
|----|----|-----------------------------------------------------------------------------------------------|
| 1  |    |                                                                                               |
| 2  |    |                                                                                               |
| 3  |    |                                                                                               |
| 4  | 24 | Asymptomatic transmission.tw. 92                                                              |
| 5  |    |                                                                                               |
| 6  | 25 | Symptomless.tw. 1961                                                                          |
| 7  |    |                                                                                               |
| 8  | 26 | Asymptomatic contact.tw. 62                                                                   |
| 9  |    |                                                                                               |
| 10 | 27 | No respiratory symptom*.tw. 263                                                               |
| 11 |    |                                                                                               |
| 12 | 28 | Inapparent Infection*.tw. 365                                                                 |
| 13 |    |                                                                                               |
| 14 | 29 | Subclinical Infection*.tw. 1807                                                               |
| 15 |    |                                                                                               |
| 16 | 30 | Presymptomatic*.tw. 3821                                                                      |
| 17 |    |                                                                                               |
| 18 | 31 | Asymptomatic State*.tw. 222                                                                   |
| 19 |    |                                                                                               |
| 20 | 32 | Pre-Symptomatic Disease*.tw. 31                                                               |
| 21 |    |                                                                                               |
| 22 | 33 | 13 or 14 or 15 or 16 or 17 or 18 or 19 or 20 or 21 or 22 or 23 or 24 or 25 or 26 or 27 805657 |
| 23 |    |                                                                                               |
| 24 |    | or 28 or 29 or 30 or 31 or 32                                                                 |
| 25 |    |                                                                                               |
| 26 | 34 | 12 and 33 to yr="2019 - 2020" 2150                                                            |
| 27 |    |                                                                                               |
| 28 |    |                                                                                               |
| 29 |    |                                                                                               |
| 30 |    |                                                                                               |
| 31 |    |                                                                                               |
| 32 |    |                                                                                               |
| 33 |    |                                                                                               |
| 34 |    |                                                                                               |
| 35 |    |                                                                                               |
| 36 |    |                                                                                               |
| 37 |    |                                                                                               |
| 38 |    |                                                                                               |
| 39 |    |                                                                                               |
| 40 |    |                                                                                               |
| 41 |    |                                                                                               |
| 42 |    |                                                                                               |
| 43 |    |                                                                                               |
| 44 |    |                                                                                               |
| 45 |    |                                                                                               |
| 46 |    |                                                                                               |
| 47 |    |                                                                                               |
| 48 |    |                                                                                               |
| 49 |    |                                                                                               |
| 50 |    |                                                                                               |
| 51 |    |                                                                                               |
| 52 |    |                                                                                               |
| 53 |    |                                                                                               |
| 54 |    |                                                                                               |
| 55 |    |                                                                                               |
| 56 |    |                                                                                               |
| 57 |    |                                                                                               |
| 58 |    |                                                                                               |
| 59 |    |                                                                                               |
| 60 |    |                                                                                               |

review only

**PubMed (n=4,156)**

| # ▲ | Searches                                              | Results |
|-----|-------------------------------------------------------|---------|
| 1   | Search: SARS-CoV-2 [Text Word]                        | 83767   |
| 2   | Search: COVID-19 [Text Word]                          | 129668  |
| 3   | Search: 2019-nCoV [Text Word]                         | 1629    |
| 4   | Search: novel coronavirus [Text Word]                 | 8709    |
| 5   | Search: coronavirus 2019[Text Word]                   | 1522    |
| 6   | Search: 2019 coronavirus [Text Word]                  | 525     |
| 7   | Search: Wuhan coronavirus [Text Word]                 | 15      |
| 8   | Search: Wuhan pneumonia [Text Word]                   | 8       |
| 9   | Search: COVID 19 [Text Word]                          | 129668  |
| 10  | Search: Coronavirus Disease-19 [Text Word]            | 1402    |
| 11  | Search: SARS Coronavirus 2 Infection [Text Word]      | 8       |
| 12  | 1 or 2 or 3 or 4 or 5 or 6 or 7 or 8 or 9 or 10 or 11 | 134001  |
| 13  | Search: Asymptomatic [Text Word]                      | 168176  |
| 14  | Search: Asymptomatic Carrier*[Text Word]              | 4055    |
| 15  | Search: Asymptomatic positive*[Text Word]             | 56      |
| 16  | Search: No symptom*[Text Word]                        | 10181   |
| 17  | Search: No sign*[Text Word]                           | 753877  |
| 18  | Search: Asymptomatic individual*[Text Word]           | 4437    |
| 19  | Search: Asymptomatic person*[Text Word]               | 831     |
| 20  | Search: Asymptomatic patient*[Text Word]              | 16575   |
| 21  | Search: Asymptomatic case*[Text Word]                 | 1792    |
| 22  | Search: Asymptomatic carriage [Text Word]             | 655     |
| 23  | Search: Asymptomatic proportion [Text Word]           | 12      |
| 24  | Search: Asymptomatic transmission [Text Word]         | 145     |

|    |    |                                                                                                |
|----|----|------------------------------------------------------------------------------------------------|
| 1  |    |                                                                                                |
| 2  |    |                                                                                                |
| 3  |    |                                                                                                |
| 4  | 25 | Search: Symptomless [Text Word] 2890                                                           |
| 5  |    |                                                                                                |
| 6  | 26 | Search: Asymptomatic contact [Text Word] 73                                                    |
| 7  |    |                                                                                                |
| 8  | 27 | Search: No respiratory symptom*[Text Word] 306                                                 |
| 9  |    |                                                                                                |
| 10 | 28 | Search: Inapparent Infection*[Text Word] 396                                                   |
| 11 |    |                                                                                                |
| 12 | 29 | Search: Subclinical Infection*[Text Word] 2030                                                 |
| 13 |    |                                                                                                |
| 14 | 30 | Search: Presymptomatic*[Text Word] 5647                                                        |
| 15 |    |                                                                                                |
| 16 | 31 | Search: Asymptomatic State*[Text Word] 264                                                     |
| 17 |    |                                                                                                |
| 18 | 32 | Search: Pre-Symptomatic Disease*[Text Word] 36                                                 |
| 19 |    |                                                                                                |
| 20 | 33 | 13 or 14 or 15 or 16 or 17 or 18 or 19 or 20 or 21 or 22 or 23 or 24 or 25 or 26 or 27 1029910 |
| 21 |    |                                                                                                |
| 22 |    | or 28 or 29 or 30 or 31 or 32                                                                  |
| 23 |    |                                                                                                |
| 24 | 34 | 12 and 33 yr="2019/11/01 - 2020/12/31" 4156                                                    |
| 25 |    |                                                                                                |
| 26 |    |                                                                                                |
| 27 |    |                                                                                                |
| 28 |    |                                                                                                |
| 29 |    |                                                                                                |
| 30 |    |                                                                                                |
| 31 |    |                                                                                                |
| 32 |    |                                                                                                |
| 33 |    |                                                                                                |
| 34 |    |                                                                                                |
| 35 |    |                                                                                                |
| 36 |    |                                                                                                |
| 37 |    |                                                                                                |
| 38 |    |                                                                                                |
| 39 |    |                                                                                                |
| 40 |    |                                                                                                |
| 41 |    |                                                                                                |
| 42 |    |                                                                                                |
| 43 |    |                                                                                                |
| 44 |    |                                                                                                |
| 45 |    |                                                                                                |
| 46 |    |                                                                                                |
| 47 |    |                                                                                                |
| 48 |    |                                                                                                |
| 49 |    |                                                                                                |
| 50 |    |                                                                                                |
| 51 |    |                                                                                                |
| 52 |    |                                                                                                |
| 53 |    |                                                                                                |
| 54 |    |                                                                                                |
| 55 |    |                                                                                                |
| 56 |    |                                                                                                |
| 57 |    |                                                                                                |
| 58 |    |                                                                                                |
| 59 |    |                                                                                                |
| 60 |    |                                                                                                |

**Embase (n=3,660)**

| # ▲ | Searches                                              | Results |
|-----|-------------------------------------------------------|---------|
| 1   | SARS-CoV-2.tw.                                        | 35873   |
| 2   | COVID-19.tw.                                          | 112478  |
| 3   | 2019-nCoV.tw.                                         | 1252    |
| 4   | novel coronavirus.tw.                                 | 7926    |
| 5   | coronavirus 2019.tw.                                  | 1403    |
| 6   | 2019 coronavirus.tw.                                  | 494     |
| 7   | Wuhan coronavirus.tw.                                 | 24      |
| 8   | Wuhan pneumonia.tw.                                   | 11      |
| 9   | COVID 19.tw.                                          | 112478  |
| 10  | Coronavirus Disease-19.tw.                            | 1309    |
| 11  | SARS Coronavirus 2 Infection.tw.                      | 7       |
| 12  | 1 or 2 or 3 or 4 or 5 or 6 or 7 or 8 or 9 or 10 or 11 | 123709  |
| 13  | Asymptomatic.tw.                                      | 236862  |
| 14  | Asymptomatic Carrier*.tw.                             | 4966    |
| 15  | Asymptomatic positive*.tw.                            | 88      |
| 16  | No symptom*.tw.                                       | 15110   |
| 17  | No sign*.tw.                                          | 1097376 |
| 18  | Asymptomatic individual*.tw.                          | 6175    |
| 19  | Asymptomatic person*.tw.                              | 1038    |
| 20  | Asymptomatic patient*.tw.                             | 24930   |
| 21  | Asymptomatic case*.tw.                                | 2480    |
| 22  | Asymptomatic carriage.tw.                             | 794     |
| 23  | Asymptomatic proportion.tw.                           | 17      |
| 24  | Asymptomatic transmission.tw.                         | 119     |

|    |    |                                                                                             |
|----|----|---------------------------------------------------------------------------------------------|
| 1  |    |                                                                                             |
| 2  |    |                                                                                             |
| 3  |    |                                                                                             |
| 4  | 25 | Symptomless.tw. 2478                                                                        |
| 5  |    |                                                                                             |
| 6  | 26 | Asymptomatic contact.tw. 85                                                                 |
| 7  |    |                                                                                             |
| 8  | 27 | No respiratory symptom*.tw. 536                                                             |
| 9  |    |                                                                                             |
| 10 | 28 | Inapparent Infection*.tw. 374                                                               |
| 11 |    |                                                                                             |
| 12 | 29 | Subclinical Infection*.tw. 2235                                                             |
| 13 |    |                                                                                             |
| 14 | 30 | Presymptomatic*.tw. 5955                                                                    |
| 15 |    |                                                                                             |
| 16 | 31 | Asymptomatic State*.tw. 363                                                                 |
| 17 |    |                                                                                             |
| 18 | 32 | Pre-Symptomatic Disease*.tw. 69                                                             |
| 19 |    |                                                                                             |
| 20 | 33 | 13 or 14 or 15 or 16 or 17 or 18 or 19 or 20 or 21 or 22 or 23 or 24 or 25 or 26 or 1346922 |
| 21 |    |                                                                                             |
| 22 |    | 27 or 28 or 29 or 30 or 31 or 32                                                            |
| 23 |    |                                                                                             |
| 24 | 34 | 13 and 42 yr="2019 - 2020" 3660                                                             |
| 25 |    |                                                                                             |
| 26 |    |                                                                                             |
| 27 |    |                                                                                             |
| 28 |    |                                                                                             |
| 29 |    |                                                                                             |
| 30 |    |                                                                                             |
| 31 |    |                                                                                             |
| 32 |    |                                                                                             |
| 33 |    |                                                                                             |
| 34 |    |                                                                                             |
| 35 |    |                                                                                             |
| 36 |    |                                                                                             |
| 37 |    |                                                                                             |
| 38 |    |                                                                                             |
| 39 |    |                                                                                             |
| 40 |    |                                                                                             |
| 41 |    |                                                                                             |
| 42 |    |                                                                                             |
| 43 |    |                                                                                             |
| 44 |    |                                                                                             |
| 45 |    |                                                                                             |
| 46 |    |                                                                                             |
| 47 |    |                                                                                             |
| 48 |    |                                                                                             |
| 49 |    |                                                                                             |
| 50 |    |                                                                                             |
| 51 |    |                                                                                             |
| 52 |    |                                                                                             |
| 53 |    |                                                                                             |
| 54 |    |                                                                                             |
| 55 |    |                                                                                             |
| 56 |    |                                                                                             |
| 57 |    |                                                                                             |
| 58 |    |                                                                                             |
| 59 |    |                                                                                             |
| 60 |    |                                                                                             |



1  
2  
3  
4 CNKI (n=1,900)

5 FT=("新型冠状病毒"+"新冠肺炎"+"新型冠状病毒肺炎"+"严重急性呼吸综合征冠状病毒  
6 2"+"2019-nCov"+"2019 新型冠状病毒"+"2019 冠状病毒"+"corona virus  
7 disease-19"+"COVID-19"+"SARS-COV-2"+"novel coronavirus pneumonia"+"NCP")and FT=("  
8 无症状"+"无症状携带者"+"无症状患者"+"无症状阳性"+"无症状的阳检测病例"+"检测患者  
9 "+"没有症状"+"无症状感染"+"无症状感染者"+"无临床症状"+"无感染症状"+"无相关感染症  
10 状"+"无临床特征"+"没有临床特征"+"无明显症状"+"没有明显症状"+"隐性感染"+"隐性感染  
11 者")  
12  
13  
14

15 WanFang (n=2,306)

16 (全部:(新型冠状病毒+新冠肺炎+新型冠状病毒肺炎+严重急性呼吸综合征冠状病毒  
17 2+2019-nCov+2019 新型冠状病毒 +2019 冠状病毒 +corona virus  
18 disease-19+COVID-19+SARS-COV-2+novel coronavirus pneumonia+NCP)\*全部:(无症状+无症  
19 状携带者+无症状患者+无症状阳性+无症状的阳检测病例+检测患者+没有症状+无症状感染  
20 +无症状感染者+无临床症状+无感染症状+无相关感染症状+无临床特征+没有临床特征+无  
21 明显症状+没有明显症状+隐性感染+隐性感染者)) \*Date:2019-  
22  
23  
24  
25  
26  
27

28 VIP (n=762)

29 (U=(新型冠状病毒 OR 新冠肺炎 OR 新型冠状病毒肺炎 OR 严重急性呼吸综合征冠状病  
30 毒 2 OR 2019-nCov OR 2019 新型冠状病毒 OR 2019 冠状病毒 OR corona virus disease-19 OR  
31 COVID-19 OR SARS-COV-2 OR novel coronavirus pneumonia OR NCP)) AND (U=(无症状  
32 OR 无症状携带者 OR 无症状患者 OR 无症状阳性 OR 无症状的阳检测病例 OR 检测患  
33 者 OR 没有症状 OR 无症状感染 OR 无症状感染者 OR 无临床症状 OR 无感染症状  
34 OR 无相关感染症状 OR 无临床特征 OR 没有临床特征 OR 无明显症状 OR 没有明显症  
35 状 OR 隐性感染 OR 隐性感染者))  
36  
37  
38  
39  
40  
41  
42  
43  
44  
45  
46  
47  
48  
49  
50  
51  
52  
53  
54  
55  
56  
57  
58  
59  
60

**Supplementary Table 2 Characteristics of the studies included for meta-analysis**

| Author                            | City/Province           | Country      | Sample size | Age (mean or median [ $\pm$ SD or IQR]; range) | Study population | Male (%) | Positive patient (n) | The number of test-positive and asymptomatic patients (n) | The number of presymptomatic infections (n) | Confirmed date        |
|-----------------------------------|-------------------------|--------------|-------------|------------------------------------------------|------------------|----------|----------------------|-----------------------------------------------------------|---------------------------------------------|-----------------------|
| Abey Suriya Sanduni(1)            | London                  | UK           | 180         | Mean:29.9y ( $\pm$ 7.4)                        | Pregnant         | 0.0      | 7                    | 6                                                         | 0                                           | 2020/04/22-2020/05/05 |
| Adedeji Idris Abiodun(2)          | Bauchi State            | Nigeria      | 53          | Mean:12.63y ( $\pm$ 4.31)                      | Children         | 52.8     | 53                   | 32                                                        | 0                                           | 2020/03/-2020/06      |
| Adetola Hammed Hassan(3)          | northern Sierra Leone   | West Africa  | 30          | Mean: 69.0 months ( $\pm$ 51.7)                | Children         | 55.6     | 9                    | 4                                                         | 0                                           | 2020/04/24-2020/09    |
| Aherfi Sarah(4)                   | Marseille               | France       | 63          | Mean: 45y                                      | Adult            | NA       | 63                   | 9                                                         | 0                                           | 2020/03/15-2020/03/30 |
| Almazeedi Sulaiman(5)             | South Surra             | Kuwait       | 1096        | Median: 41y                                    | Adult            | 81.0     | 1096                 | 507                                                       | 35                                          | 2020/02/24-2020/04/20 |
| Alshahrani Mohammed S(6)          | Alkhobar                | Saudi Arabia | 301         | Mean: 32.9y ( $\pm$ 8.7)                       | Adult            | 38.9     | 18                   | 12                                                        | 0                                           | 2020/05/01-2020/06/15 |
| Alshukry Abdullah(7)              | South Surra             | Kuwait       | 417         | Median: 47y (IQR:32-60y)                       | Adult            | 62.8     | 417                  | 164                                                       | 0                                           | 2020/02/24-2020/05/24 |
| Alsofayan Yousef M(8)             | NA                      | Saudi Arabia | 825         | Median: 36y                                    | Adult            | 54.3     | 825                  | 77                                                        | 0                                           | 2020/03/01-2020/03/31 |
| Alvin J Ing(9)                    | Cruise ship             | Cruise ship  | 217         | NA                                             | Adult            | NA       | 128                  | 104                                                       | 0                                           | 2020/04/03            |
| Amy V. Dora(10)                   | Los Angeles, California | US           | 19          | Median: 75y (66-85y)                           | Adult            | 100.0    | 19                   | 6                                                         | 0                                           | 2020/3/29-2020/3/21   |
| An YH(11)                         | Beijing                 | China        | 54          | Median: 48y (37-87y)                           | Adult            | 44.0     | 9                    | 1                                                         | 0                                           | 2020/01/21-2020/03/04 |
| Andrea Lombardi(12)               | Lombardy                | Italy        | 1573        | Mean: 44.5y                                    | Adult            | 35.8     | 139                  | 17                                                        | 0                                           | 2020/02/24-2020/03/31 |
| Antonio-Villa Neftali Eduardo(13) | NA                      | Mexico       | 35095       | Mean:40.2y ( $\pm$ 10.7)                       | Adult            | 37.0     | 11226                | 341                                                       | 0                                           | till 2020/07/05       |
| Arima(14)                         | Japan                   | Japan        | 566         | NA                                             | Adult            | NA       | 12                   | 4                                                         | 0                                           | 2020/1-2020/2         |

|    |                            |               |          |     |                              |          |      |     |     |    |                       |
|----|----------------------------|---------------|----------|-----|------------------------------|----------|------|-----|-----|----|-----------------------|
| 1  | Ashinyo Mary Eyrarn(15)    | Greater Accra | Ghana    | 307 | Mean: 37.9y (±16.3)          | Adult    | 56.7 | 307 | 263 | 0  | 2020/03/23-2020/06/29 |
| 2  |                            |               |          |     |                              |          |      |     |     |    |                       |
| 3  | Atakla Hugues Ghislain(16) | Conakry       | Guinea   | 36  | Mean:9.66y (±1.32)           | Children | 55.6 | 36  | 11  | 0  | 2020/01/01-2020/09/30 |
| 4  |                            |               |          |     |                              |          |      |     |     |    |                       |
| 5  |                            |               |          |     |                              |          |      |     |     |    |                       |
| 6  | Backer JA(17)              | Wuhan         | China    | 88  | Range: 2-72y                 | Adult    | 65.0 | 88  | 2   | 0  | 2020/01/22-2020/01/29 |
| 7  |                            |               |          |     |                              |          |      |     |     |    |                       |
| 8  | Bai M(18)                  | Wuhan         | China    | 472 | Mean: 50.7y (±11.6)          | Adult    | 46.0 | 472 | 37  | 2  | 2020/02/12-2020/03/08 |
| 9  |                            |               |          |     |                              |          |      |     |     |    |                       |
| 10 |                            |               |          |     |                              |          |      |     |     |    |                       |
| 11 | Bai R(19)                  | Xian          | China    | 120 | Mean: 43y (range: 1.5-93y)   | Adult    | 48.0 | 120 | 25  | 0  | 2020/01/01-2020/03/06 |
| 12 |                            |               |          |     |                              |          |      |     |     |    |                       |
| 13 | Bai SL(20)                 | Gansu         | China    | 8   | Median: 50.5y (range: 2-82y) | Adult    | 50.0 | 7   | 5   | 1  | 2020/01/22-2020/01/31 |
| 14 |                            |               |          |     |                              |          |      |     |     |    |                       |
| 15 |                            |               |          |     |                              |          |      |     |     |    |                       |
| 16 | Bhakti Sarangi(21)         | Maharashtra   | India    | 50  | Median:6y(IQR:2-12y)         | Children | 56.0 | 50  | 29  | 0  | 2020/04/01-2020/05/20 |
| 17 |                            |               |          |     |                              |          |      |     |     |    |                       |
| 18 | Bianco Angela(22)          | New York      | US       | 155 | Mean: 32.7y (±6.4)           | Pregnant | 0.0  | 24  | 4   | 0  | 2020/04/04-2020/04/15 |
| 19 |                            |               |          |     |                              |          |      |     |     |    |                       |
| 20 |                            |               |          |     |                              |          |      |     |     |    |                       |
| 21 | Bin YF(23)                 | Wuhan         | China    | 55  | Mean: 53.9y (±17.1)          | Adult    | 56.0 | 55  | 1   | 0  | 2020/01/29-2020/02/16 |
| 22 |                            |               |          |     |                              |          |      |     |     |    |                       |
| 23 | Blain Hubert(24)           | Montpellier   | France   | 113 | Mean: 86y (±15.5)            | Adult    | NA   | 36  | 9   | 0  | 2020/03/03-2020/03/06 |
| 24 |                            |               |          |     |                              |          |      |     |     |    |                       |
| 25 |                            |               |          |     |                              |          |      |     |     |    |                       |
| 26 | Böhmer(25)                 | Bavaria       | Germany  | 16  | Median: 35y (range: 2-58y)   | Adult    | 75.0 | 16  | 2   | 1  | 2020/1/1-2020/2/19    |
| 27 |                            |               |          |     |                              |          |      |     |     |    |                       |
| 28 | Breslin Noelle(26)         | New York      | US       | 43  | Mean: 29.7y (±6.0)           | Pregnant | 0.0  | 43  | 14  | 10 | 2020/03/12-2020/03/27 |
| 29 |                            |               |          |     |                              |          |      |     |     |    |                       |
| 30 |                            |               |          |     |                              |          |      |     |     |    |                       |
| 31 | Bruminhent Jackrapong(27)  | Bangkok       | Thailand | 405 | Mean: 36y (±10)              | Adult    | 34.0 | 53  | 2   | 0  | 2020/03/23-2020/04/07 |
| 32 |                            |               |          |     |                              |          |      |     |     |    |                       |
| 33 | Cai Jichao(28)             | Shanghai      | China    | 49  | Mean: 11.5y (±5.12)          | Children | 57.1 | 49  | 21  | 0  | 2020/01/19-2020/04/30 |
| 34 |                            |               |          |     |                              |          |      |     |     |    |                       |
| 35 |                            |               |          |     |                              |          |      |     |     |    |                       |
| 36 | Cao JM(29)                 | Nanchong      | China    | 25  | Range: 10-77y                | Adult    | 48.0 | 25  | 12  | 0  | 2020/01/21-2020/02/18 |
| 37 |                            |               |          |     |                              |          |      |     |     |    |                       |
| 38 | Carla Felice(30)           | NA            | Italy    | 98  | NA                           | Adult    | 39.0 | 18  | 6   | 0  | NA                    |
| 39 |                            |               |          |     |                              |          |      |     |     |    |                       |
| 40 |                            |               |          |     |                              |          |      |     |     |    |                       |
| 41 | Chan JFW(31)               | Wuhan         | China    | 7   | Mean: 46.17y(range: 10-66y)  | Adult    | 50.0 | 6   | 1   | 0  | 2020/01/10-2020/01/15 |
| 42 |                            |               |          |     |                              |          |      |     |     |    |                       |
| 43 |                            |               |          |     |                              |          |      |     |     |    |                       |
| 44 |                            |               |          |     |                              |          |      |     |     |    |                       |
| 45 |                            |               |          |     |                              |          |      |     |     |    |                       |
| 46 |                            |               |          |     |                              |          |      |     |     |    |                       |

|    |                            |             |             |      |                                       |          |      |      |     |    |                       |
|----|----------------------------|-------------|-------------|------|---------------------------------------|----------|------|------|-----|----|-----------------------|
| 1  | Chen B(32)                 | Hainan      | China       | 69   | Median: 51y (range: 28-83y)           | Adult    | 59.0 | 69   | 5   | 0  | 2020/01/18-2020/02/29 |
| 2  |                            |             |             |      |                                       |          |      |      |     |    |                       |
| 3  | Chen J(33)                 | Shanghai    | China       | 249  | Median: 51y (36-64y)                  | Adult    | 51.0 | 249  | 7   | 0  | 2020/01/20-2020/02/06 |
| 4  |                            |             |             |      |                                       |          |      |      |     |    |                       |
| 5  |                            |             |             |      |                                       |          |      |      |     |    |                       |
| 6  | Chen T(34)                 | Wuhan       | China       | 76   | Mean: 59.5y (range: 28-86y)           | Adult    | 57.0 | 76   | 10  | 0  | 2020/01-2020/02       |
| 7  |                            |             |             |      |                                       |          |      |      |     |    |                       |
| 8  | Chen Y(35)                 | Ningbo      | China       | 187  | Median: 12y(range: 30-70y)            | Adult    | NA   | 191  | 30  | 0  | 2020/01/21-2020/03/06 |
| 9  |                            |             |             |      |                                       |          |      |      |     |    |                       |
| 10 |                            |             |             |      |                                       |          |      |      |     |    |                       |
| 11 | Chen YJ(36)                | Chongqing   | China       | 143  | Mean: 45.13y (range: 15-79y)          | Adult    | 51.0 | 143  | 11  | 0  | 2020/01/23-2020/02/08 |
| 12 |                            |             |             |      |                                       |          |      |      |     |    |                       |
| 13 | Cheng ZP(37)               | Yantai      | China       | 25   | Median: 42y (±12)                     | Adult    | 56.0 | 25   | 1   | 0  | 2020/01-2020/02       |
| 14 |                            |             |             |      |                                       |          |      |      |     |    |                       |
| 15 |                            |             |             |      |                                       |          |      |      |     |    |                       |
| 16 | Choe PG(38)                | Seoul       | South Korea | 113  | Median:25y (IQR: 21.5-39.5y)          | Adult    | 47.8 | 113  | 54  | 0  | 2020/03/05-2020/04/09 |
| 17 |                            |             |             |      |                                       |          |      |      |     |    |                       |
| 18 | COVID-19 National Incident | NA          | Australia   | 295  | Median: 47y (range: 0-94y)            | Adult    | 50.0 | 295  | 139 | 0  | 2020/01/21-2020/03/14 |
| 19 | Room Surveillance Team(39) |             |             |      |                                       |          |      |      |     |    |                       |
| 20 |                            |             |             |      |                                       |          |      |      |     |    |                       |
| 21 | Dai Y(40)                  | Guangxi     | China       | 11   | Median:6.1y(range: 0.25-15y)          | Children | 36.3 | 11   | 4   | 0  | 2020/01/19-2020/03/11 |
| 22 |                            |             |             |      |                                       |          |      |      |     |    |                       |
| 23 | Daniela Loconsole(41)      | Apulia      | Italy       | 166  | Median:11y(range: 0-17y)              | Children | 48.8 | 166  | 104 | 0  | 2020/03/01-2020/06/01 |
| 24 |                            |             |             |      |                                       |          |      |      |     |    |                       |
| 25 |                            |             |             |      |                                       |          |      |      |     |    |                       |
| 26 | Ding Y(42)                 | Wuhan       | China       | 56   | Mean: 54.6y (range: 24-86y)           | Adult    | 54.0 | 56   | 3   | 0  | 2020/01/01-2020/02/03 |
| 27 |                            |             |             |      |                                       |          |      |      |     |    |                       |
| 28 |                            |             |             |      |                                       |          |      |      |     |    |                       |
| 29 | Dong X(43)                 | Wuhan       | China       | 11   | Median: 43y (range: 2-69y)            | Adult    | 45.0 | 11   | 1   | 0  | 2020/01/20-2020/02/29 |
| 30 |                            |             |             |      |                                       |          |      |      |     |    |                       |
| 31 | Dong XC(44)                | Tianjin     | China       | 135  | Mean: 48.62y (range:8-90y)            | Adult    | 53.0 | 135  | 4   | 0  | 2020/01/13-2020/02/20 |
| 32 |                            |             |             |      |                                       |          |      |      |     |    |                       |
| 33 |                            |             |             |      |                                       |          |      |      |     |    |                       |
| 34 | Dong YY(45)                | Yangzhou    | China       | 37   | Mean: 38.64y (range: 1-74y)           | Adult    | 59.0 | 37   | 14  | 0  | 2020/01-2020/02       |
| 35 |                            |             |             |      |                                       |          |      |      |     |    |                       |
| 36 | Erinoso Olufemi A.(46)     | Lagos State | Nigeria     | 632  | Median:40y (IQR:30.5-49y)             | Adult    | 60.1 | 632  | 398 | 0  | 2020/04/01-2020/05/31 |
| 37 |                            |             |             |      |                                       |          |      |      |     |    |                       |
| 38 | Eythorsson Elias(47)       | NA          | Iceland     | 1564 | Median:40y(IQR:26-53y, range: 0-103y) | Adult    | 51.0 | 1564 | 83  | 34 | 2020/03/17-2020/04/30 |
| 39 |                            |             |             |      |                                       |          |      |      |     |    |                       |
| 40 |                            |             |             |      |                                       |          |      |      |     |    |                       |
| 41 | Fakiri EL K(48)            | Marrakesh   | Morocco     | 74   | Mean: 7y (±1.5)                       | Children | 54.1 | 74   | 54  | 0  | 2020/03/02-2020/04/01 |
| 42 |                            |             |             |      |                                       |          |      |      |     |    |                       |
| 43 |                            |             |             |      |                                       |          |      |      |     |    |                       |
| 44 |                            |             |             |      |                                       |          |      |      |     |    |                       |
| 45 |                            |             |             |      |                                       |          |      |      |     |    |                       |
| 46 |                            |             |             |      |                                       |          |      |      |     |    |                       |

|    |                            |                     |         |       |                                  |          |      |      |     |   |                       |
|----|----------------------------|---------------------|---------|-------|----------------------------------|----------|------|------|-----|---|-----------------------|
| 1  | Fan YZ(49)                 | Luan                | China   | 79    | NA                               | Adult    | NA   | 79   | 10  | 5 | 2020/01/20-2020/02/20 |
| 2  |                            |                     |         |       |                                  |          |      |      |     |   |                       |
| 3  | Feaster Matt(50)           | California          | US      | 1093  | NA                               | Adult    | 35.5 | 631  | 97  | 0 | 2020/04-2020/05       |
| 4  |                            |                     |         |       |                                  |          |      |      |     |   |                       |
| 5  |                            |                     |         |       |                                  |          |      |      |     |   |                       |
| 6  | Feng XP(51)                | Jingzhou            | China   | 52    | Median: 46y (30-63y)             | Adult    | 64.0 | 52   | 8   | 0 | 2020/01/23-2020/03/08 |
| 7  |                            |                     |         |       |                                  |          |      |      |     |   |                       |
| 8  | Foster Catherine E.(52)    | Texas               | US      | 16544 | Median:7.1y(IQR:1.7-13.8y)       | Children | 51.4 | 1215 | 193 | 0 | 2020/03/10-2020/06/28 |
| 9  |                            |                     |         |       |                                  |          |      |      |     |   |                       |
| 10 |                            |                     |         |       |                                  |          |      |      |     |   |                       |
| 11 | Friederike Maechler(53)    | Berlin              | Germany | 5179  | Median:34y(24-67y)               | Adult    | 49.1 | 333  | 14  | 2 | 2020/03/03-2020/04/13 |
| 12 |                            |                     |         |       |                                  |          |      |      |     |   |                       |
| 13 | Gao HJ(54)                 | Ganzizhou           | China   | 54    | Mean:42.69y (±17.94)             | Adult    | 55.1 | 96   | 18  | 0 | till 2020/02/28       |
| 14 |                            |                     |         |       |                                  |          |      |      |     |   |                       |
| 15 |                            |                     |         |       |                                  |          |      |      |     |   |                       |
| 16 | Gao T(55)                  | Liaocheng, Xianyang | China   | 40    | Mean: 41y                        | Adult    | 48.0 | 40   | 4   | 1 | 2020/1/21-2020/2/16   |
| 17 |                            |                     |         |       |                                  |          |      |      |     |   |                       |
| 18 | Gautret P(56)              | NA                  | France  | 36    | Mean: 45.1y                      | Adult    | 42.0 | 36   | 6   | 0 | 2020/3/1-2020/3/16    |
| 19 |                            |                     |         |       |                                  |          |      |      |     |   |                       |
| 20 |                            |                     |         |       |                                  |          |      |      |     |   |                       |
| 21 | Gill Livingston(57)        | UK                  | UK      | 344   | Mean:75.3y (±8.2)                | Adult    | 48.0 | 131  | 16  | 0 | 2020/03/01-2020/04/30 |
| 22 |                            |                     |         |       |                                  |          |      |      |     |   |                       |
| 23 | Grados Isabel Zumalave(58) | Callao              | Peru    | 671   | Mean:27.2y (range:14-45y)        | Pregnant | 0.0  | 317  | 303 | 0 | 2020/05/01-2020/07/31 |
| 24 |                            |                     |         |       |                                  |          |      |      |     |   |                       |
| 25 |                            |                     |         |       |                                  |          |      |      |     |   |                       |
| 26 | Graham N.S.N.(59)          | London              | UK      | 313   | NA                               | Adult    | NA   | 180  | 54  | 0 | 2020/03-2020/04/09    |
| 27 |                            |                     |         |       |                                  |          |      |      |     |   |                       |
| 28 | Grechukhina Olga(60)       | New Haven           | US      | 1567  | Median:30y (IQR:25-34y)          | Pregnant | 0.0  | 141  | 44  | 0 | 2020/03/03-2020/05/11 |
| 29 |                            |                     |         |       |                                  |          |      |      |     |   |                       |
| 30 |                            |                     |         |       |                                  |          |      |      |     |   |                       |
| 31 | Gu. Kim(61)                | Daegu               | Korea   | 213   | NA                               | Adult    | NA   | 213  | 41  | 0 | NA                    |
| 32 |                            |                     |         |       |                                  |          |      |      |     |   |                       |
| 33 | Guo CX(62)                 | mainland China      | China   | 341   | Median:7y (4 days to 14 years)   | Children | 53.7 | 341  | 20  | 0 | 2020/1/15-2020/3/15   |
| 34 |                            |                     |         |       |                                  |          |      |      |     |   |                       |
| 35 |                            |                     |         |       |                                  |          |      |      |     |   |                       |
| 36 | Han RD(63)                 | Haozhou             | China   | 108   | Median:42y (range: 5-86y)        | Adult    | 48.2 | 108  | 17  | 0 | 2020/01/21-2020/03/05 |
| 37 |                            |                     |         |       |                                  |          |      |      |     |   |                       |
| 38 | He M(64)                   | Beijing             | China   | 35    | Mean: 7.1y (±4.2; range:0.5-15y) | Children | 51.4 | 35   | 4   | 0 | 2020/01-2020/06       |
| 39 |                            |                     |         |       |                                  |          |      |      |     |   |                       |
| 40 |                            |                     |         |       |                                  |          |      |      |     |   |                       |
| 41 | He WB(65)                  | Zhuzhou             | China   | 101   | Range: 3-88y                     | Adult    | 47.5 | 101  | 21  | 0 | 2020/01/01-2020/05/15 |
| 42 |                            |                     |         |       |                                  |          |      |      |     |   |                       |
| 43 |                            |                     |         |       |                                  |          |      |      |     |   |                       |
| 44 |                            |                     |         |       |                                  |          |      |      |     |   |                       |
| 45 |                            |                     |         |       |                                  |          |      |      |     |   |                       |
| 46 |                            |                     |         |       |                                  |          |      |      |     |   |                       |

|    |                        |                                                     |             |       |                               |          |      |       |      |   |                       |
|----|------------------------|-----------------------------------------------------|-------------|-------|-------------------------------|----------|------|-------|------|---|-----------------------|
| 1  | Hu SX(66)              | Hunan                                               | China       | 888   | Median: 35y (2-88y)           | Adult    | 44.4 | 888   | 36   | 0 | 2020/01/01-2020/02/08 |
| 2  |                        |                                                     |             |       |                               |          |      |       |      |   |                       |
| 3  | Huang DD(67)           | Chongqing                                           | China       | 89    | Median: 48.2y (±17.9)         | Adult    | 58.0 | 89    | 6    | 0 | 2020/01/22-2020/02/17 |
| 4  |                        |                                                     |             |       |                               |          |      |       |      |   |                       |
| 5  |                        |                                                     |             |       |                               |          |      |       |      |   |                       |
| 6  | IH Huerta Saenz(68)    | Lima                                                | Peru        | 41    | Mean:32.3y                    | Pregnant | 0.0  | 41    | 28   | 0 | 2020/03/24-2020/05/07 |
| 7  |                        |                                                     |             |       |                               |          |      |       |      |   |                       |
| 8  | Ipekci A(69)           | Istanbul                                            | Turkey      | 87    | Mean: 51.27y(±6.45)           | Adult    | 72.5 | 51    | 4    | 0 | 2020/03/20-2020/04/01 |
| 9  |                        |                                                     |             |       |                               |          |      |       |      |   |                       |
| 10 |                        |                                                     |             |       |                               |          |      |       |      |   |                       |
| 11 | Irene Petersen(70)     | UK                                                  | UK          | 36061 | NA                            | Adult    | NA   | 115   | 88   | 0 | 2020/04/26-2020/06/27 |
| 12 |                        |                                                     |             |       |                               |          |      |       |      |   |                       |
| 13 | Jennifer S. Singer(71) | LA                                                  | US          | 4751  | Median:58y                    | Adult    | 50.0 | 18    | 10   | 0 | 2020/04/07-2020/05/21 |
| 14 |                        |                                                     |             |       |                               |          |      |       |      |   |                       |
| 15 |                        |                                                     |             |       |                               |          |      |       |      |   |                       |
| 16 | Jeong SJ(72)           | Seoul                                               | South Korea | 234   | Mean: 37.78y (±15.57)         | Adult    | 39.7 | 234   | 66   | 0 | 2020/03/15-2020/04/10 |
| 17 |                        |                                                     |             |       |                               |          |      |       |      |   |                       |
| 18 | Jha S(73)              | NA                                                  | India       | 3667  | IQR: 18-40y                   | Adult    | 52.1 | 20    | 10   | 0 | 2020/03/23-2020/04/30 |
| 19 |                        |                                                     |             |       |                               |          |      |       |      |   |                       |
| 20 |                        |                                                     |             |       |                               |          |      |       |      |   |                       |
| 21 | Ji GH(74)              | Jingzhou                                            | China       | 45    | Mean: 45.4y(range: 21-67y)    | Adult    | 60.0 | 45    | 3    | 0 | 2020/1/19-2020/2/1    |
| 22 |                        |                                                     |             |       |                               |          |      |       |      |   |                       |
| 23 | Ji T(75)               | Huangshi, Wuhan                                     | China       | 51021 | NA                            | Adult    | NA   | 51021 | 50   | 0 | 2020/01/10-2020/03/27 |
| 24 |                        |                                                     |             |       |                               |          |      |       |      |   |                       |
| 25 |                        |                                                     |             |       |                               |          |      |       |      |   |                       |
| 26 | Jia CY(76)             | Beijing                                             | China       | 60    | Median: 59.5y (28-91y)        | Adult    | 40.0 | 60    | 1    | 0 | 2020/01/20-2020/02/20 |
| 27 |                        |                                                     |             |       |                               |          |      |       |      |   |                       |
| 28 | Jiang CH(77)           | Wuhan                                               | China       | 214   | Median:51y(range: 11-82y)     | Adult    | 40.0 | 214   | 26   | 0 | 2020/02/05-2020/03/10 |
| 29 |                        |                                                     |             |       |                               |          |      |       |      |   |                       |
| 30 |                        |                                                     |             |       |                               |          |      |       |      |   |                       |
| 31 | Jiang R(78)            | Guangzhou                                           | China       | 25    | Mean: 44.2y (range:12-86y)    | Adult    | 44.0 | 25    | 1    | 0 | 2020/01/25-2020/03/25 |
| 32 |                        |                                                     |             |       |                               |          |      |       |      |   |                       |
| 33 | Jibrin YB(79)          | Bauchi                                              | Nigeria     | 84    | Mean: 41.0y(±10.5)            | Adult    | 72.0 | 84    | 49   | 0 | 2020/03/01-2020/06/30 |
| 34 |                        |                                                     |             |       |                               |          |      |       |      |   |                       |
| 35 |                        |                                                     |             |       |                               |          |      |       |      |   |                       |
| 36 | Jin MH(80)             | Huzhou                                              | China       | 10    | Median: 32y (range: 0.58-56y) | Adult    | 50.0 | 10    | 1    | 0 | 2020/01/25-2020/02/07 |
| 37 |                        |                                                     |             |       |                               |          |      |       |      |   |                       |
| 38 | Jung CY(81)            | South Korea                                         | South Korea | 10237 | Mean: 45y (±19.8)             | Adult    | 39.9 | 10237 | 6350 | 0 | 2020/01/24-2020/04/09 |
| 39 |                        |                                                     |             |       |                               |          |      |       |      |   |                       |
| 40 |                        |                                                     |             |       |                               |          |      |       |      |   |                       |
| 41 | Kang M(82)             | Shenzhen, Guangzhou,<br>Foshan, Yangjiang, Shaoguan | China       | 37    | Median: 58y (range:10-78y)    | Adult    | 49.0 | 37    | 2    | 0 | 2020/01/12-2020/01/23 |
| 42 |                        |                                                     |             |       |                               |          |      |       |      |   |                       |
| 43 |                        |                                                     |             |       |                               |          |      |       |      |   |                       |
| 44 |                        |                                                     |             |       |                               |          |      |       |      |   |                       |
| 45 |                        |                                                     |             |       |                               |          |      |       |      |   |                       |
| 46 |                        |                                                     |             |       |                               |          |      |       |      |   |                       |

|    |                       |                                        |             |       |                                  |          |      |       |       |     |                       |
|----|-----------------------|----------------------------------------|-------------|-------|----------------------------------|----------|------|-------|-------|-----|-----------------------|
| 1  | Kasper MR(83)         | Theodore Roosevelt aircraft carrier    | US          | 4779  | Mean: 27y                        | Adult    | 78.3 | 1331  | 572   | 0   | 2020/03/23-2020/05/18 |
| 2  |                       |                                        |             |       |                                  |          |      |       |       |     |                       |
| 3  | Ke B(84)              | Chongqing                              | China       | 25    | Median: 11.0y (range: 0.6-17y)   | Children | 56.0 | 25    | 8     | 0   | 2020/1/19-2020/3/12   |
| 4  |                       |                                        |             |       |                                  |          |      |       |       |     |                       |
| 5  |                       |                                        |             |       |                                  |          |      |       |       |     |                       |
| 6  | Kenu E(85)            | NA                                     | Ghana       | 17736 | Median:33y (IQR: 0.1-85y)        | Adult    | 57.8 | 17763 | 14242 | 0   | 2020/03/12-2020/06/30 |
| 7  |                       |                                        |             |       |                                  |          |      |       |       |     |                       |
| 8  |                       | Seoul, Goyang, Siheung,                |             |       |                                  |          |      |       |       |     |                       |
| 9  |                       | Bucheon, Gwangju, Suwon,               |             |       |                                  |          |      |       |       |     |                       |
| 10 | Ki M(86)              | Incheon, Pyeongtaek,                   | South Korea | 28    | Median: 42y (range: 20-73y)      | Adult    | 54.0 | 28    | 3     | 0   | 2020/01/20-2020/02/10 |
| 11 |                       | Gunsan, Guri, Naju,                    |             |       |                                  |          |      |       |       |     |                       |
| 12 |                       | Evacuated from Wuhan                   |             |       |                                  |          |      |       |       |     |                       |
| 13 |                       |                                        |             |       |                                  |          |      |       |       |     |                       |
| 14 |                       |                                        |             |       |                                  |          |      |       |       |     |                       |
| 15 | Kirenga Bruce(87)     | Entebbe                                | Uganda      | 56    | Mean:34.2y (±15.5; range:25-43y) | Adult    | 67.9 | 56    | 32    | 0   | till 16 May 2020      |
| 16 |                       |                                        |             |       |                                  |          |      |       |       |     |                       |
| 17 | Kong WF(88)           | Sichuan                                | China       | 511   | Range:1 month to 87 years        | Adult    | 55.0 | 511   | 100   | 0   | 2020/01/25-2020/02/20 |
| 18 |                       |                                        |             |       |                                  |          |      |       |       |     |                       |
| 19 |                       |                                        |             |       |                                  |          |      |       |       |     |                       |
| 20 | Krajcar N(89)         | NA                                     | Croatia     | 289   | Median:10y (IQR: 4.6-15.7y)      | Children | 43.1 | 230   | 95    | 0   | 2020/03/12-2020/07/19 |
| 21 |                       |                                        |             |       |                                  |          |      |       |       |     |                       |
| 22 | Kristin J. Meyers(90) | Indianapolis Metropolitan              | US          | 2953  | Mean:48.1y (±16.3)               | Adult    | 36.3 | 91    | 81    | 23  | 2020/04/07-2020/05/16 |
| 23 |                       |                                        |             |       |                                  |          |      |       |       |     |                       |
| 24 |                       |                                        |             |       |                                  |          |      |       |       |     |                       |
| 25 | Kumar R(91)           | New Delhi                              | India       | 231   | Mean: 39.8y(±13.6)               | Adult    | 78.3 | 231   | 108   | 0   | 2020/03/20-2020/04/30 |
| 26 |                       |                                        |             |       |                                  |          |      |       |       |     |                       |
| 27 | Ladhani Shamez N(92)  | London                                 | UK          | 264   | Median:47y(IQR:35-56y)           | Adult    | 21.9 | 105   | 67    | 21  | 2020/04/10-2020/04/13 |
| 28 |                       |                                        |             |       |                                  |          |      |       |       |     |                       |
| 29 |                       |                                        |             |       |                                  |          |      |       |       |     |                       |
| 30 | Lai XQ(93)            | Wuhan                                  | China       | 110   | Median: 36.5y (30.0-47.0y)       | Adult    | 28.0 | 110   | 3     | 0   | 2020/1/1-2020/2/9     |
| 31 |                       |                                        |             |       |                                  |          |      |       |       |     |                       |
| 32 | Le TQM(94)            | Vinh Phuc Province, Thanh Hoa Province | Vietnam     | 12    | Median: 30y (range: 0.25-55y)    | Adult    | 33.0 | 12    | 1     | 0   | 2020/01/21-2020/01/27 |
| 33 |                       |                                        |             |       |                                  |          |      |       |       |     |                       |
| 34 |                       |                                        |             |       |                                  |          |      |       |       |     |                       |
| 35 | Lee YH(95)            | Daegu                                  | South Korea | 632   | Mean: 40.6y (±17.3)              | Adult    | 32.0 | 632   | 557   | 186 | 2020/03/02-2020/04/30 |
| 36 |                       |                                        |             |       |                                  |          |      |       |       |     |                       |
| 37 | Lei MY(96)            | Guizhou                                | China       | 146   | NA                               | Adult    | NA   | 146   | 25    | 0   | 2020/01/21-2020/03/10 |
| 38 |                       |                                        |             |       |                                  |          |      |       |       |     |                       |
| 39 |                       |                                        |             |       |                                  |          |      |       |       |     |                       |
| 40 | Lewis Megan(97)       | Texas                                  | Mexico      | 231   | Median:22y (range:19-62y)        | Adult    | 55.0 | 64    | 14    | 0   | 2020/03/26-2020/04/05 |
| 41 |                       |                                        |             |       |                                  |          |      |       |       |     |                       |
| 42 |                       |                                        |             |       |                                  |          |      |       |       |     |                       |
| 43 |                       |                                        |             |       |                                  |          |      |       |       |     |                       |
| 44 |                       |                                        |             |       |                                  |          |      |       |       |     |                       |
| 45 |                       |                                        |             |       |                                  |          |      |       |       |     |                       |
| 46 |                       |                                        |             |       |                                  |          |      |       |       |     |                       |

|    |              |          |           |     |                                 |          |      |     |    |   |                       |
|----|--------------|----------|-----------|-----|---------------------------------|----------|------|-----|----|---|-----------------------|
| 1  | Li CY(98)    | Xuzhou   | China     | 7   | Median: 42y (range: 21-62y)     | Adult    | 57.0 | 7   | 1  | 0 | 2020/01/25-2020/01/31 |
| 2  |              |          |           |     |                                 |          |      |     |    |   |                       |
| 3  | Li J(99)     | NA       | Singapore | 39  | NA                              | Children | 60.0 | 39  | 15 | 0 | 2020/01-2020/05       |
| 4  |              |          |           |     |                                 |          |      |     |    |   |                       |
| 5  |              |          |           |     |                                 |          |      |     |    |   |                       |
| 6  | Li W(100)    | Zhuhai   | China     | 5   | Median: 3y (1.4-6y)             | Children | 80.0 | 5   | 4  | 0 | 2020/01/28-2020/02/08 |
| 7  |              |          |           |     |                                 |          |      |     |    |   |                       |
| 8  | Li Y(101)    | Wuhan    | China     | 53  | Mean: 58y (range: 26-83)        | Adult    | 55.0 | 51  | 1  | 0 | 2020/01/23-2020/01-29 |
| 9  |              |          |           |     |                                 |          |      |     |    |   |                       |
| 10 |              |          |           |     |                                 |          |      |     |    |   |                       |
| 11 | Li Y(102)    | Wuhan    | China     | 127 | Median: 6y(range:0.17-15y)      | Children | 57.0 | 127 | 21 | 0 | 2020/1/28-2020/3/12   |
| 12 |              |          |           |     |                                 |          |      |     |    |   |                       |
| 13 | Li YL(103)   | Hubei    | China     | 252 | Median:46y(range: 8-65y)        | Adult    | 49.6 | 252 | 74 | 0 | 2020/02/22-2020/03/08 |
| 14 |              |          |           |     |                                 |          |      |     |    |   |                       |
| 15 |              |          |           |     |                                 |          |      |     |    |   |                       |
| 16 | Liao XN(104) | wuhan    | China     | 42  | Median:51.6y (22-69y)           | Adult    | 69.0 | 42  | 5  | 0 | 2020/01/16-2020/02/18 |
| 17 |              |          |           |     |                                 |          |      |     |    |   |                       |
| 18 | Lin S(105)   | Shanghai | China     | 161 | Median:45y(range:1-84y)         | Adult    | 49.7 | 161 | 6  | 0 | till 2020/02/17       |
| 19 |              |          |           |     |                                 |          |      |     |    |   |                       |
| 20 |              |          |           |     |                                 |          |      |     |    |   |                       |
| 21 | Lin XM(106)  | Zhaoqing | China     | 23  | Range: 3-65y                    | Adult    | 56.5 | 23  | 4  | 0 | 2020/01/23-2020/05/06 |
| 22 |              |          |           |     |                                 |          |      |     |    |   |                       |
| 23 | Lin ZF(107)  | Yichang  | China     | 205 | Median: 56.0y (range: 1.25-88y) | Adult    | 55.0 | 205 | 15 | 0 | 2020/01/24-2020/03/09 |
| 24 |              |          |           |     |                                 |          |      |     |    |   |                       |
| 25 |              |          |           |     |                                 |          |      |     |    |   |                       |
| 26 | Liu B(108)   | Shunde   | China     | 9   | Range: 21-61y                   | Adult    | 44.4 | 9   | 2  | 0 | 2020/01/22-2020/02/20 |
| 27 |              |          |           |     |                                 |          |      |     |    |   |                       |
| 28 | Liu BM(109)  | Wuhan    | China     | 68  | Mean: 44.3y (±16.4)             | Adult    | 37.0 | 68  | 36 | 0 | 2020/2/7-2020/3/26    |
| 29 |              |          |           |     |                                 |          |      |     |    |   |                       |
| 30 |              |          |           |     |                                 |          |      |     |    |   |                       |
| 31 | Liu BY(110)  | Zhejiang | China     | 91  | Mean: 33.66y (range: 7-73y)     | Adult    | 53.0 | 91  | 43 | 0 | 2020/03/01-2020/04/07 |
| 32 |              |          |           |     |                                 |          |      |     |    |   |                       |
| 33 | Liu DH(111)  | Wuhan    | China     | 15  | Mean: 32y (range:23-40y)        | Pregnant | 0.0  | 15  | 2  | 0 | 2020/01/20-2020/02/10 |
| 34 |              |          |           |     |                                 |          |      |     |    |   |                       |
| 35 |              |          |           |     |                                 |          |      |     |    |   |                       |
| 36 | Liu F(112)   | Hangzhou | China     | 10  | Median: 42y (34-50y)            | Adult    | 40.0 | 10  | 1  | 0 | 2020/01/22-2020/02/22 |
| 37 |              |          |           |     |                                 |          |      |     |    |   |                       |
| 38 | Liu F(113)   | Wuhan    | China     | 44  | Mean: 30y (range:22-43y)        | Pregnant | 0.0  | 16  | 7  | 0 | 2020/01/11-2020/02/13 |
| 39 |              |          |           |     |                                 |          |      |     |    |   |                       |
| 40 |              |          |           |     |                                 |          |      |     |    |   |                       |
| 41 | Liu GT(114)  | Ningxia  | China     | 70  | Mean: 40y (range: 3-77y)        | Adult    | 53.0 | 70  | 10 | 0 | 2020/01/22-2020/02/17 |
| 42 |              |          |           |     |                                 |          |      |     |    |   |                       |
| 43 |              |          |           |     |                                 |          |      |     |    |   |                       |
| 44 |              |          |           |     |                                 |          |      |     |    |   |                       |
| 45 |              |          |           |     |                                 |          |      |     |    |   |                       |
| 46 |              |          |           |     |                                 |          |      |     |    |   |                       |



|    |                  |                              |       |      |                                  |          |      |     |    |    |                       |
|----|------------------|------------------------------|-------|------|----------------------------------|----------|------|-----|----|----|-----------------------|
| 1  | Liu MQ(115)      | Chongqing                    | China | 5    | Median: 5.2y (range: 0.58-13y)   | Children | 60.0 | 5   | 3  | 0  | NA                    |
| 2  |                  |                              |       |      |                                  |          |      |     |    |    |                       |
| 3  | Liu X(116)       | Chenzhou                     | China | 5    | Mean: 30y (range:2.5-56y)        | Adult    | 40.0 | 5   | 1  | 0  | 2020/01/31-2020/02/06 |
| 4  |                  |                              |       |      |                                  |          |      |     |    |    |                       |
| 5  | Liu XX(117)      | Hefei                        | China | 105  | Median: 45y (range: 21-87 years) | Adult    | 0.0  | 105 | 24 | 0  | till 2020/03/06       |
| 6  |                  |                              |       |      |                                  |          |      |     |    |    |                       |
| 7  |                  |                              |       |      |                                  |          |      |     |    |    |                       |
| 8  |                  | Hefei                        | China | 7    | Median: 10y (range: 5-10y)       | Children | NA   | 7   | 4  | 0  | till 2020/03/06       |
| 9  |                  |                              |       |      |                                  |          |      |     |    |    |                       |
| 10 |                  | Hubei, Fujian, Shanxi,       |       |      |                                  |          |      |     |    |    |                       |
| 11 | Liu YL(118)      | Beijing, Guangdong, Jiangxi, | China | 12   | Median: 30y (22-36)              | Pregnant | 0.0  | 13  | 1  | 0  | 2019/12/08-2020/02/25 |
| 12 |                  | Heilongjiang, Anhui          |       |      |                                  |          |      |     |    |    |                       |
| 13 |                  |                              |       |      |                                  |          |      |     |    |    |                       |
| 14 | Liu YX(119)      | Shenzhen                     | China | 12   | Median: 62.5y (range: 10-72y)    | Adult    | 67.0 | 12  | 1  | 0  | 2020/01/11-2020/01/20 |
| 15 |                  |                              |       |      |                                  |          |      |     |    |    |                       |
| 16 |                  |                              |       |      |                                  |          |      |     |    |    |                       |
| 17 | Liu ZR(120)      | Anhui                        | China | 15   | Median: 42y (range:14-84y)       | Adult    | 47.0 | 15  | 2  | 0  | 2020/02/04-2020/02/12 |
| 18 |                  |                              |       |      |                                  |          |      |     |    |    |                       |
| 19 |                  |                              |       |      |                                  |          |      |     |    |    |                       |
| 20 | Lu RF(121)       | Nantong                      | China | 28   | Median: 50y (range: 26-73y)      | Adult    | 61.0 | 28  | 1  | 0  | 2020/1/23-2020/2/26   |
| 21 |                  |                              |       |      |                                  |          |      |     |    |    |                       |
| 22 | Lu XX(122)       | Wuhan                        | China | 1391 | Median: 6.7y (range: 0-15y)      | Children | 61.0 | 171 | 27 | 0  | 2020/01/28-2020/02/26 |
| 23 |                  |                              |       |      |                                  |          |      |     |    |    |                       |
| 24 |                  |                              |       |      |                                  |          |      |     |    |    |                       |
| 25 | Lu Y(123)        | Guangzhou                    | China | 9    | Mean: 7.8y (range: 0.17-15y)     | Children | 56.0 | 9   | 1  | 0  | 2020/1/22-2020/2/9    |
| 26 |                  |                              |       |      |                                  |          |      |     |    |    |                       |
| 27 | Lucy Rivett(124) | UK                           | UK    | 1270 | NA                               | Adult    | 0.0  | 61  | 31 | 24 | 2020/04/06-2020/04/24 |
| 28 |                  |                              |       |      |                                  |          |      |     |    |    |                       |
| 29 |                  |                              |       |      |                                  |          |      |     |    |    |                       |
| 30 | Luo SH(125)      | Anqing                       | China | 83   | NA                               | Adult    | NA   | 83  | 8  | 7  | till 2020/02/21       |
| 31 |                  |                              |       |      |                                  |          |      |     |    |    |                       |
| 32 | M.M. Arons(126)  | King County                  | US    | 76   | Mean: 78.6y ( $\pm 9.5$ )        | Adult    | NA   | 48  | 27 | 24 | 2020/3/3-2020/3/26    |
| 33 |                  |                              |       |      |                                  |          |      |     |    |    |                       |
| 34 |                  |                              |       |      |                                  |          |      |     |    |    |                       |
| 35 | Ma MM(127)       | Guangzhou                    | China | 347  | Median: 48y                      | Adult    | 49.8 | 361 | 14 | 0  | till 2020/03/11       |
| 36 |                  |                              |       |      |                                  |          |      |     |    |    |                       |
| 37 | Ma Y(128)        | Jinan                        | China | 47   | Median: 34y (range: 1-72y)       | Adult    | 43.0 | 47  | 11 | 0  | 2020/1/23-2020/3/10   |
| 38 |                  |                              |       |      |                                  |          |      |     |    |    |                       |
| 39 |                  |                              |       |      |                                  |          |      |     |    |    |                       |
| 40 | Ma YL(129)       | Wuhan                        | China | 115  | Range: 1.67-5y                   | Children | 64.0 | 115 | 61 | 0  | NA                    |
| 41 |                  |                              |       |      |                                  |          |      |     |    |    |                       |
| 42 |                  |                              |       |      |                                  |          |      |     |    |    |                       |
| 43 |                  |                              |       |      |                                  |          |      |     |    |    |                       |
| 44 |                  |                              |       |      |                                  |          |      |     |    |    |                       |
| 45 |                  |                              |       |      |                                  |          |      |     |    |    |                       |
| 46 |                  |                              |       |      |                                  |          |      |     |    |    |                       |

|    |                         |                                    |             |       |                                   |          |      |      |     |   |                       |
|----|-------------------------|------------------------------------|-------------|-------|-----------------------------------|----------|------|------|-----|---|-----------------------|
| 1  | MacIntyre CR(130)       | NA                                 | Japan       | 565   | NA                                | Adult    | NA   | 8    | 5   | 0 | 2020/01/29-2020/01/31 |
| 2  |                         |                                    |             |       |                                   |          |      |      |     |   |                       |
| 3  | Mahesh C. Patel(131)    | DuPage, Illinois                   | US          | 126   | Median:82y(IQR:75-92y)            | Adult    | 31.0 | 35   | 13  | 0 | 2020/03/11-2020/03/15 |
| 4  |                         |                                    |             |       |                                   |          |      |      |     |   |                       |
| 5  | Martin C(132)           | Brussels                           | Belgium     | 326   | Mean: 36y (range: 21-59y)         | Adult    | 24.0 | 41   | 31  | 0 | 2020/04/15-2020/05/18 |
| 6  |                         |                                    |             |       |                                   |          |      |      |     |   |                       |
| 7  | Maru Sheela(133)        | New York                           | US          | 124   | Mean: 30.2y                       | Pregnant | 0.0  | 46   | 33  | 0 | 2020/03/29-2020/04/22 |
| 8  |                         |                                    |             |       |                                   |          |      |      |     |   |                       |
| 9  | McMichael TM(134)       | King County                        | US          | 167   | Median: 72y (range: 21-100y)      | Adult    | 33.0 | 167  | 7   | 0 | 2020/02/28-2020/03/18 |
| 10 |                         |                                    |             |       |                                   |          |      |      |     |   |                       |
| 11 | Mei X(135)              | Shanghai                           | China       | 494   | Median:40y(6-88y)                 | Adult    | 53.8 | 494  | 39  | 8 | 2020/01/20-2020/03/31 |
| 12 |                         |                                    |             |       |                                   |          |      |      |     |   |                       |
| 13 | Michael J. Fassett(136) | Southern California                | US          | 3923  | Mean: 31.2y (±5.29)               | Pregnant | 0.0  | 17   | 17  | 1 | 2020/04/06-2020/05/11 |
| 14 |                         |                                    |             |       |                                   |          |      |      |     |   |                       |
| 15 | Michel Bielecki(137)    | Swiss Army Base in Airolo          | Switzerland | 508   | Median: 21y (18-28y)              | Adult    | 92.0 | 228  | 126 | 0 | 2020/3/11-2020/5/3    |
| 16 |                         |                                    |             |       |                                   |          |      |      |     |   |                       |
| 17 | Miyamae Y(138)          | Tokyo                              | Japan       | 23    | Median: 67y (29-79y)              | Adult    | 43.0 | 23   | 15  | 0 | 2020/02/18-2020/02/25 |
| 18 |                         |                                    |             |       |                                   |          |      |      |     |   |                       |
| 19 | Mohammed A M Ahmed(139) | Somalia                            | Somalia     | 182   | Mean: 22y (±4)                    | Adult    | 66.0 | 49   | 16  | 0 | 2020/4/23-2020/5/7    |
| 20 |                         |                                    |             |       |                                   |          |      |      |     |   |                       |
| 21 | Moon SS(140)            | Gyeongsangbuk-do                   | South Korea | 352   | Mean: 56 y (range: 14–95y)        | Adult    | 40.9 | 352  | 81  | 0 | 2020/02/18-2020/06/30 |
| 22 |                         |                                    |             |       |                                   |          |      |      |     |   |                       |
| 23 | Moriarty LF(141)        | Yokohama                           | Japan       | 3711  | Range: 29-73y                     | Adult    | 55.0 | 712  | 331 | 0 | 2020/02/05-2020/02/20 |
| 24 |                         |                                    |             |       |                                   |          |      |      |     |   |                       |
| 25 | Nagler AR(142)          | Long Island, Brooklyn, Long Island | US          | 14746 | NA                                | Adult    | NA   | 1905 | 536 | 0 | 2020/03/25-2020/05/18 |
| 26 |                         |                                    |             |       |                                   |          |      |      |     |   |                       |
| 27 | Niccolò Parri(143)      | Italy                              | Italy       | 170   | Median:3.75y (IQR:4 months-10.7y) | Children | 56.0 | 170  | 29  | 0 | 2020/03/02-2020/05/02 |
| 28 |                         |                                    |             |       |                                   |          |      |      |     |   |                       |
| 29 | Niu YL(144)             | Suqian                             | China       | 13    | Mean: 32.3y (range: 12-48y)       | Adult    | 46.0 | 13   | 3   | 0 | 2020/01/25-2020/03/03 |
| 30 |                         |                                    |             |       |                                   |          |      |      |     |   |                       |
| 31 | Oduro-Mensah E(145)     | NA                                 | Ghana       | 275   | Mean: 40.7y±16.4                  | Adult    | 54.5 | 275  | 142 | 0 | 2020/03-2020/05       |
| 32 |                         |                                    |             |       |                                   |          |      |      |     |   |                       |
| 33 | Ou JM(146)              | Fujian                             | China       | 298   | Median: 42y (range: 0.42-93y)     | Adult    | 55.0 | 298  | 3   | 0 | till 2020/02/21       |
| 34 |                         |                                    |             |       |                                   |          |      |      |     |   |                       |
| 35 |                         |                                    |             |       |                                   |          |      |      |     |   |                       |
| 36 |                         |                                    |             |       |                                   |          |      |      |     |   |                       |
| 37 |                         |                                    |             |       |                                   |          |      |      |     |   |                       |
| 38 |                         |                                    |             |       |                                   |          |      |      |     |   |                       |
| 39 |                         |                                    |             |       |                                   |          |      |      |     |   |                       |
| 40 |                         |                                    |             |       |                                   |          |      |      |     |   |                       |
| 41 |                         |                                    |             |       |                                   |          |      |      |     |   |                       |
| 42 |                         |                                    |             |       |                                   |          |      |      |     |   |                       |
| 43 |                         |                                    |             |       |                                   |          |      |      |     |   |                       |
| 44 |                         |                                    |             |       |                                   |          |      |      |     |   |                       |
| 45 |                         |                                    |             |       |                                   |          |      |      |     |   |                       |
| 46 |                         |                                    |             |       |                                   |          |      |      |     |   |                       |

|    |                       |           |                           |       |                                    |          |      |     |     |   |                       |
|----|-----------------------|-----------|---------------------------|-------|------------------------------------|----------|------|-----|-----|---|-----------------------|
| 1  | Pan XQ(147)           | Wenzhou   | China                     | 64    | Mean: 48.8y (±12.9)                | Adult    | 61.0 | 64  | 6   | 0 | 2020/02/05-2020/02/20 |
| 2  |                       |           |                           |       |                                    |          |      |     |     |   |                       |
| 3  | Pérez-GarcíaF(148)    | Madrid    | Spain                     | 2963  | NA                                 | Adult    | 24.7 | 884 | 345 | 0 | 2020/03-2020/05       |
| 4  |                       |           |                           |       |                                    |          |      |     |     |   |                       |
| 5  |                       |           |                           |       |                                    |          |      |     |     |   |                       |
| 6  | Pongpirul W(149)      | NA        | Thailand                  | 193   | Median: 37y (IQR: 29–53y)          | Adult    | 58.5 | 193 | 13  | 3 | 2020/01/08-2020/04/16 |
| 7  |                       |           |                           |       |                                    |          |      |     |     |   |                       |
| 8  | Pongpirul WA(150)     | Bangkok   | Tailand                   | 11    | Median: 61y (range: 28-74y)        | Adult    | 55.0 | 11  | 1   | 0 | 2020/01/08-2020/01/31 |
| 9  |                       |           |                           |       |                                    |          |      |     |     |   |                       |
| 10 |                       |           |                           |       |                                    |          |      |     |     |   |                       |
| 11 | Qiu CF(151)           | Hunan     | China                     | 104   | Mean:43y (±7.54)                   | Adult    | 47.1 | 104 | 5   | 0 | 2020/01/22-2020/02/12 |
| 12 |                       |           |                           |       |                                    |          |      |     |     |   |                       |
| 13 | Redditt V(152)        | Toronto   | Canada                    | 60    | Mean: 36.0y(±10.0)                 | Adult    | 80.0 | 25  | 7   | 3 | 2020/4/20             |
| 14 |                       |           |                           |       |                                    |          |      |     |     |   |                       |
| 15 |                       |           |                           |       |                                    |          |      |     |     |   |                       |
| 16 | Roman G. Shmakov(153) | Moscow    | Russia                    | 66    | Mean:30.3y (±6.25)                 | Pregnant | 0.0  | 66  | 15  | 0 | NA                    |
| 17 |                       |           |                           |       |                                    |          |      |     |     |   |                       |
| 18 | Rubbi I(154)          | Ravenna   | Italy                     | 93    | Mean: 45.96y ± 10.71               | Adult    | 29.0 | 93  | 9   | 0 | 2020/03/25-2020/05/05 |
| 19 |                       |           |                           |       |                                    |          |      |     |     |   |                       |
| 20 |                       |           |                           |       |                                    |          |      |     |     |   |                       |
| 21 | Salim Mattar(155)     | Colombia  | US                        | 686   | Mean:43y (range:1-95y)             | Adult    | NA   | 35  | 18  | 0 | 2020/04/09-2020/05/16 |
| 22 |                       |           |                           |       |                                    |          |      |     |     |   |                       |
| 23 | Seong Eun Kim(156)    | NA        | Korea                     | 71    | Median: 31y (17.8-55.8y)           | Adult    | 46.0 | 71  | 13  | 3 | NA                    |
| 24 |                       |           |                           |       |                                    |          |      |     |     |   |                       |
| 25 |                       |           |                           |       |                                    |          |      |     |     |   |                       |
| 26 | Shaher M. Samrah(157) | Jordan    | Jordan                    | 81    | Mean:39.95y (±16.59; range:18-80y) | Adult    | 45.7 | 81  | 37  | 0 | 2020/03/17-2020/04/02 |
| 27 |                       |           |                           |       |                                    |          |      |     |     |   |                       |
| 28 | She X(158)            | Suining   | China                     | 9     | Mean: 29y (range: 24-35y)          | Adult    | 33.0 | 9   | 1   | 0 | 2020/01/20-2020/02/12 |
| 29 |                       |           |                           |       |                                    |          |      |     |     |   |                       |
| 30 |                       |           |                           |       |                                    |          |      |     |     |   |                       |
| 31 | Son H(159)            | Busan     | South Korea               | 18303 | NA                                 | Adult    | 45.4 | 108 | 12  | 0 | 2020/02/21-2020/03/24 |
| 32 |                       |           |                           |       |                                    |          |      |     |     |   |                       |
| 33 | Song W(160)           | Xiangyang | China                     | 16    | Median: 8.5y range:0.96-14y)       | Children | 63.0 | 16  | 8   | 0 | 2020/01/01-2020/03/17 |
| 34 |                       |           |                           |       |                                    |          |      |     |     |   |                       |
| 35 |                       |           |                           |       |                                    |          |      |     |     |   |                       |
| 36 | Song YS(161)          | Zhengzhou | China                     | 17    | Mean:47y (range: 12-83y)           | Adult    | 58.8 | 17  | 1   | 0 | 2020/02-2020/03       |
| 37 |                       |           |                           |       |                                    |          |      |     |     |   |                       |
| 38 |                       |           | Belgium, Finland, France, |       |                                    |          |      |     |     |   |                       |
| 39 | Spiteri G(162)        | NA        | Germany, Italy, Russia,   | 38    | Median: 42y (2-81y)                | Adult    | 66.0 | 38  | 2   | 0 | 2020/01/17-2020/02/21 |
| 40 |                       |           | Spain,Sweden              |       |                                    |          |      |     |     |   |                       |
| 41 |                       |           |                           |       |                                    |          |      |     |     |   |                       |
| 42 |                       |           |                           |       |                                    |          |      |     |     |   |                       |
| 43 |                       |           |                           |       |                                    |          |      |     |     |   |                       |
| 44 |                       |           |                           |       |                                    |          |      |     |     |   |                       |
| 45 |                       |           |                           |       |                                    |          |      |     |     |   |                       |
| 46 |                       |           |                           |       |                                    |          |      |     |     |   |                       |

|    |                        |               |               |      |                                |          |      |      |     |   |                       |
|----|------------------------|---------------|---------------|------|--------------------------------|----------|------|------|-----|---|-----------------------|
| 1  | Sun DF(163)            | Jiaying       | China         | 30   | Mean: 49y (range: 30-71y)      | Adult    | 50.0 | 30   | 1   | 0 | 2020/01/24-2020/02/06 |
| 2  |                        |               |               |      |                                |          |      |      |     |   |                       |
| 3  | Sun WW(164)            | Zhejiang      | China         | 391  | NA                             | Adult    | 41.0 | 391  | 54  | 0 | 2020/01/08-2020/02/06 |
| 4  |                        |               |               |      |                                |          |      |      |     |   |                       |
| 5  |                        |               |               |      |                                |          |      |      |     |   |                       |
| 6  | Sun Z(165)             | Anhui         | China         | 21   | Mean: 40.52y ( $\pm$ 17.14)    | Adult    | 52.0 | 21   | 4   | 0 | 2020/01/23-2020/03/08 |
| 7  |                        |               |               |      |                                |          |      |      |     |   |                       |
| 8  | Tang A(166)            | Zhoushan      | China         | 10   | Mean: 50.9y (range: 28-67y)    | Adult    | 70.0 | 10   | 5   | 5 | till 2020/02/17       |
| 9  |                        |               |               |      |                                |          |      |      |     |   |                       |
| 10 |                        |               |               |      |                                |          |      |      |     |   |                       |
| 11 | Tang Olive(167)        | Baltimore     | US            | 1970 | Median:73.9y (IQR:21.9-105.4y) | Adult    | 57.0 | 752  | 424 | 0 | 2020/03/01-2020/06/12 |
| 12 |                        |               |               |      |                                |          |      |      |     |   |                       |
| 13 | Thiel SL(168)          | NA            | Liechtenstein | 95   | Median: 39y (IQR: 28-56y)      | Adult    | 51.6 | 95   | 2   | 0 | 2020/03/02-2020/04/23 |
| 14 |                        |               |               |      |                                |          |      |      |     |   |                       |
| 15 |                        |               |               |      |                                |          |      |      |     |   |                       |
| 16 | Tian SC(169)           | Liaocheng     | China         | 37   | Mean:44.3y ( $\pm$ 1.67)       | Adult    | 45.9 | 37   | 7   | 0 | NA                    |
| 17 |                        |               |               |      |                                |          |      |      |     |   |                       |
| 18 | Tian SJ(170)           | Beijing       | China         | 262  | Median: 47.5y (range: 1-94y)   | Adult    | 49.0 | 262  | 13  | 0 | till 2020/02/10       |
| 19 |                        |               |               |      |                                |          |      |      |     |   |                       |
| 20 |                        |               |               |      |                                |          |      |      |     |   |                       |
| 21 | Timothy J. Judson(171) | San Francisco | US            | 1129 | NA                             | Adult    | NA   | 1129 | 315 | 0 | NA                    |
| 22 |                        |               |               |      |                                |          |      |      |     |   |                       |
| 23 | Tolia VM(172)          | San Diego     | US            | 283  | NA                             | Adult    | 53.0 | 29   | 2   | 0 | 2002/03/10-2020/03-19 |
| 24 |                        |               |               |      |                                |          |      |      |     |   |                       |
| 25 |                        |               |               |      |                                |          |      |      |     |   |                       |
| 26 | Tong H(173)            | Bengbu        | China         | 24   | Mean: 53y (range: 17-74y)      | Adult    | 63.0 | 24   | 4   | 0 | 2020/01/10-2020/02/15 |
| 27 |                        |               |               |      |                                |          |      |      |     |   |                       |
| 28 | Tong ZD(174)           | Zhoushan      | China         | 7    | Median: 28.5y (12-45y).        | Adult    | 43.0 | 7    | 3   | 0 | 2020/1/1              |
| 29 |                        |               |               |      |                                |          |      |      |     |   |                       |
| 30 |                        |               |               |      |                                |          |      |      |     |   |                       |
| 31 | Treibel TA(175)        | London        | UK            | 1523 | NA                             | Adult    | NA   | 1523 | 65  | 0 | since2020/3/23        |
| 32 |                        |               |               |      |                                |          |      |      |     |   |                       |
| 33 |                        |               |               |      |                                |          |      |      |     |   |                       |
| 34 | Tsou Tsung-Pei(176)    | Taiwan        | China         | 100  | Median:44y(range:11-88y)       | Adult    | 44.0 | 100  | 10  | 0 | 2020/01/11-2020/03/16 |
| 35 |                        |               |               |      |                                |          |      |      |     |   |                       |
| 36 | Viktoriya London(177)  | New York      | US            | 156  | Range:24.5-34.8y               | Pregnant | 0.0  | 68   | 22  | 0 | 2020/03/15-2020/04/15 |
| 37 |                        |               |               |      |                                |          |      |      |     |   |                       |
| 38 | Wan R(178)             | Hunan         | China         | 78   | NA                             | Adult    | NA   | 78   | 2   | 0 | NA                    |
| 39 |                        |               |               |      |                                |          |      |      |     |   |                       |
| 40 |                        |               |               |      |                                |          |      |      |     |   |                       |
| 41 | Wang AH(179)           | Chongqing     | China         | 29   | Mean: 48.19y (range: 3-89y)    | Adult    | 64.0 | 90   | 3   | 0 | till 2020/03/01       |
| 42 |                        |               |               |      |                                |          |      |      |     |   |                       |
| 43 |                        |               |               |      |                                |          |      |      |     |   |                       |
| 44 |                        |               |               |      |                                |          |      |      |     |   |                       |
| 45 |                        |               |               |      |                                |          |      |      |     |   |                       |
| 46 |                        |               |               |      |                                |          |      |      |     |   |                       |

|    |               |           |                   |      |                                     |          |      |      |      |    |                       |
|----|---------------|-----------|-------------------|------|-------------------------------------|----------|------|------|------|----|-----------------------|
| 1  | Wang D(180)   | Chongqing | China             | 576  | Mean: 54.79y                        | Adult    | 41.0 | 61   | 38   | 0  | 2020/1/24-2020/3/10   |
| 2  |               |           |                   |      |                                     |          |      |      |      |    |                       |
| 3  | Wang JC(181)  | Nanjing   | China             | 52   | Mean: 44y (range: 13-73y)           | Adult    | 56.0 | 52   | 2    | 0  | 2020/01/19-2020/02/03 |
| 4  |               |           |                   |      |                                     |          |      |      |      |    |                       |
| 5  | Wang KS(182)  | Pingyang  | China             | 138  | Median: 48y (33-68y)                | Adult    | 22.0 | 9    | 3    | 0  | 2020/01/19-2020/02/03 |
| 6  |               |           |                   |      |                                     |          |      |      |      |    |                       |
| 7  | Wang L(183)   | Zibo      | China             | 244  | Range: 23-84y                       | Adult    | 68.8 | 16   | 2    | 0  | 2020/01/10-2020/02/14 |
| 8  |               |           |                   |      |                                     |          |      |      |      |    |                       |
| 9  | Wang LZ(184)  | Liaocheng | China             | 26   | Median:42y(IQR:34-53y)              | Adult    | 42.3 | 26   | 7    | 0  | 2020/01/31-2020/02/12 |
| 10 |               |           |                   |      |                                     |          |      |      |      |    |                       |
| 11 | Wang S(185)   | Yichang   | China             | 738  | Range: 0.58-91y                     | Adult    | 51.0 | 70   | 70   | 0  | 2020/02/11-2020/02/23 |
| 12 |               |           |                   |      |                                     |          |      |      |      |    |                       |
| 13 | Wang T(186)   | Jilin     | China             | 50   | Mean: 44.52y (range: 16-87y)        | Adult    | 60.0 | 50   | 1    | 0  | 2020/01/28-2020/02/21 |
| 14 |               |           |                   |      |                                     |          |      |      |      |    |                       |
| 15 | Wang XB(187)  | Wuhan     | China             | 1012 | Median:50y(IQR:39-58y;range:16-89y) | Adult    | 52.0 | 1012 | 30   | 16 | 2020/02/07-2020/02/12 |
| 16 |               |           |                   |      |                                     |          |      |      |      |    |                       |
| 17 | Wang XL(188)  | Beijing   | China             | 7432 | Median:39y(IQR:27-56y)              | Adult    | 45.8 | 602  | 17   | 0  | 2020/01/19-2020/04/02 |
| 18 |               |           |                   |      |                                     |          |      |      |      |    |                       |
| 19 | Wang ZQ(189)  | Wuhan     | China             | 30   | Median:29.9y (26.8-33.3y)           | Pregnant | 0.0  | 13   | 8    | 0  | 2019/12/08-2020/04/01 |
| 20 |               |           |                   |      |                                     |          |      |      |      |    |                       |
| 21 | Waya JLL(190) | NA        | South Sudan       | 1330 | Mean: 37.1y                         | Adult    | 77.0 | 1330 | 1104 | 0  | 2020/04/05-2020/06/03 |
| 22 |               |           |                   |      |                                     |          |      |      |      |    |                       |
| 23 | Wong HYF(191) | Hongkong  | China             | 64   | Mean: 56y (range: 16-96y)           | Adult    | 41.0 | 64   | 9    | 0  | 2020/1/1-2020/3/31    |
| 24 |               |           |                   |      |                                     |          |      |      |      |    |                       |
| 25 | Wong J(192)   | NA        | Brunei Darussalam | 135  | Median: 36y (range:0.5-72y)         | Adult    | 60.7 | 135  | 54   | 13 | 2020/03/09-2020/04/05 |
| 26 |               |           |                   |      |                                     |          |      |      |      |    |                       |
| 27 | Wu GY(193)    | Wenzhou   | China             | 104  | Mean: 45y (±13)                     | Adult    | 57.0 | 104  | 2    | 0  | 2020/01/17-2020/02/04 |
| 28 |               |           |                   |      |                                     |          |      |      |      |    |                       |
| 29 | Wu HP(194)    | Jiangxi   | China             | 23   | Range: 0.25-17.67y                  | Children | 39.0 | 23   | 3    | 0  | 2020/01/21-2020/02/29 |
| 30 |               |           |                   |      |                                     |          |      |      |      |    |                       |
| 31 | Wu QR(195)    | Ganzhou   | China             | 55   | Mean: 45.22y (range: 0.25-79y)      | Adult    | 51.0 | 55   | 2    | 0  | 2020/1/23-2020/3/2    |
| 32 |               |           |                   |      |                                     |          |      |      |      |    |                       |
| 33 | Wu XQ(196)    | Wuhan     | China             | 23   | Median: 29y (21-37)                 | Pregnant | 0.0  | 23   | 15   | 0  | 2019/12/31-2020/03/07 |
| 34 |               |           |                   |      |                                     |          |      |      |      |    |                       |
| 35 |               |           |                   |      |                                     |          |      |      |      |    |                       |
| 36 |               |           |                   |      |                                     |          |      |      |      |    |                       |
| 37 |               |           |                   |      |                                     |          |      |      |      |    |                       |
| 38 |               |           |                   |      |                                     |          |      |      |      |    |                       |
| 39 |               |           |                   |      |                                     |          |      |      |      |    |                       |
| 40 |               |           |                   |      |                                     |          |      |      |      |    |                       |
| 41 |               |           |                   |      |                                     |          |      |      |      |    |                       |
| 42 |               |           |                   |      |                                     |          |      |      |      |    |                       |
| 43 |               |           |                   |      |                                     |          |      |      |      |    |                       |
| 44 |               |           |                   |      |                                     |          |      |      |      |    |                       |
| 45 |               |           |                   |      |                                     |          |      |      |      |    |                       |
| 46 |               |           |                   |      |                                     |          |      |      |      |    |                       |

|    |                              |                            |        |     |                             |          |      |     |    |   |                       |
|----|------------------------------|----------------------------|--------|-----|-----------------------------|----------|------|-----|----|---|-----------------------|
| 1  | Wu Y(197)                    | Nantong                    | China  | 23  | Median: 48y (26-68y)        | Adult    | 65.0 | 23  | 1  | 0 | NA                    |
| 2  |                              |                            |        |     |                             |          |      |     |    |   |                       |
| 3  | Wu YL(198)                   | Chengde                    | China  | 8   | Range: 22-56y               | Adult    | 50.0 | 8   | 7  | 0 | 2020/1/24-2020/3/31   |
| 4  |                              |                            |        |     |                             |          |      |     |    |   |                       |
| 5  |                              |                            |        |     |                             |          |      |     |    |   |                       |
| 6  | Xiang TX(199)                | Jiangxi                    | China  | 49  | Mean: 42.9y (18-78y)        | Adult    | NA   | 49  | 3  | 0 | 2020/1/21-2020/1/27   |
| 7  |                              |                            |        |     |                             |          |      |     |    |   |                       |
| 8  | Xie JW(200)                  | Chongqing                  | China  | 6   | Median: 46y (40-67y)        | Adult    | 67.0 | 6   | 3  | 2 | 2020/01/29-2020/02/03 |
| 9  |                              |                            |        |     |                             |          |      |     |    |   |                       |
| 10 |                              |                            |        |     |                             |          |      |     |    |   |                       |
| 11 | Xie YB(201)                  | Yongjia                    | China  | 39  | Median: 52y (22-87y)        | Adult    | 56.0 | 39  | 5  | 0 | 2020/01/20-2020/02/10 |
| 12 |                              |                            |        |     |                             |          |      |     |    |   |                       |
| 13 | Xu HM(202)                   | Chongqing,Shanxi,Guizhou,S | China  | 32  | Mean:8.7y (±4.7)            | Children | 53.0 | 32  | 6  | 0 | 2020/01/24-2020/02/12 |
| 14 |                              | ichuan                     |        |     |                             |          |      |     |    |   |                       |
| 15 |                              |                            |        |     |                             |          |      |     |    |   |                       |
| 16 | Xu S(203)                    | Wuhan                      | China  | 34  | Range: 20-40y               | Pregnant | 0.0  | 34  | 5  | 0 | 2020/01/15-2020/03/15 |
| 17 |                              |                            |        |     |                             |          |      |     |    |   |                       |
| 18 | Xu TM(204)                   | Changzhou                  | China  | 51  | NA                          | Adult    | 33.0 | 51  | 6  | 0 | 2020/1/23-2020/2/18   |
| 19 |                              |                            |        |     |                             |          |      |     |    |   |                       |
| 20 |                              |                            |        |     |                             |          |      |     |    |   |                       |
| 21 | Yan XQ(205)                  | Hunan                      | China  | 218 | Median:43y(IQR:32-52y)      | Adult    | NA   | 218 | 24 | 0 | 2020/01/21-2020/06/27 |
| 22 |                              |                            |        |     |                             |          |      |     |    |   |                       |
| 23 | Yang K(206)                  | Nanjing                    | China  | 57  | Median: 37y (range: 5-97y)  | Adult    | 51.0 | 57  | 13 | 0 | NA                    |
| 24 |                              |                            |        |     |                             |          |      |     |    |   |                       |
| 25 |                              |                            |        |     |                             |          |      |     |    |   |                       |
| 26 | Yang NB(207)                 | Ningbo                     | China  | 12  | Median:33y                  | Adult    | 30.0 | 12  | 2  | 0 | 2020/01/25-2020/02/28 |
| 27 |                              |                            |        |     |                             |          |      |     |    |   |                       |
| 28 | Yang RR(208)                 | Wuhan                      | China  | 78  | Median: 37y (26-45y)        | Adult    | 33.0 | 78  | 33 | 0 | 2019/12/24-2020/02/24 |
| 29 |                              |                            |        |     |                             |          |      |     |    |   |                       |
| 30 |                              |                            |        |     |                             |          |      |     |    |   |                       |
| 31 | Yang YL(209)                 | Chongqing                  | China  | 8   | Median: 53y (range: 9-67y)  | Adult    | 63.0 | 8   | 1  | 0 | 2020/02/01-2020/02/16 |
| 32 |                              |                            |        |     |                             |          |      |     |    |   |                       |
| 33 | Yang YX(210)                 | Chibi                      | China  | 88  | Range: 10-89y               | Adult    | 60.0 | 88  | 1  | 0 | 2020/01-2020/02       |
| 34 |                              |                            |        |     |                             |          |      |     |    |   |                       |
| 35 |                              |                            |        |     |                             |          |      |     |    |   |                       |
| 36 | Yao QD(211)                  | Wuhan                      | China  | 45  | Mean: 47.7y (range: 25-88y) | Adult    | 36.0 | 45  | 1  | 0 | 2020/01/25-2020/02/22 |
| 37 |                              |                            |        |     |                             |          |      |     |    |   |                       |
| 38 | Yao XY(212)                  | Baotou                     | China  | 7   | Median: 51y (36-68y)        | Adult    | 43.0 | 7   | 1  | 1 | 2020/02/01-2020/02/08 |
| 39 |                              |                            |        |     |                             |          |      |     |    |   |                       |
| 40 |                              |                            |        |     |                             |          |      |     |    |   |                       |
| 41 | Yayla Burcu Ceylan Cura(213) | NA                         | Turkey | 220 | Median:10y(range: 0-17y)    | Children | 48.2 | 220 | 55 | 0 | 2020/03/11-2020/06/23 |
| 42 |                              |                            |        |     |                             |          |      |     |    |   |                       |
| 43 |                              |                            |        |     |                             |          |      |     |    |   |                       |
| 44 |                              |                            |        |     |                             |          |      |     |    |   |                       |
| 45 |                              |                            |        |     |                             |          |      |     |    |   |                       |
| 46 |                              |                            |        |     |                             |          |      |     |    |   |                       |

|    |               |          |       |       |                                          |          |      |      |     |   |                       |
|----|---------------|----------|-------|-------|------------------------------------------|----------|------|------|-----|---|-----------------------|
| 1  | Ye XX(214)    | Yongjia  | China | 17    | Median: 48.8y (31-87y)                   | Adult    | 65.0 | 14   | 2   | 0 | 2020/01/24-2020/02/09 |
| 2  |               |          |       |       |                                          |          |      |      |     |   |                       |
| 3  | Ye Y(215)     | Henan    | China | 1272  | NA                                       | Adult    | NA   | 1272 | 113 | 0 | till 2020/03/09       |
| 4  |               |          |       |       |                                          |          |      |      |     |   |                       |
| 5  |               |          |       |       |                                          |          |      |      |     |   |                       |
| 6  | Yu FT(216)    | Beijing  | China | 127   | Median: 40y (range: 0.5-92y)             | Adult    | 50.0 | 77   | 2   | 0 | 2020/02/05-2020/02/19 |
| 7  |               |          |       |       |                                          |          |      |      |     |   |                       |
| 8  | Yu JX(217)    | Hangzhou | China | 87    | Mean: 42.89y ( $\pm$ 17.02; range:4-88y) | Adult    | 46.0 | 87   | 2   | 0 | 2020/1/21-2020/2/12   |
| 9  |               |          |       |       |                                          |          |      |      |     |   |                       |
| 10 |               |          |       |       |                                          |          |      |      |     |   |                       |
| 11 | Yu X(218)     | Guangxi  | China | 108   | Median: 41y (range: 0.25-85y)            | Adult    | 40.0 | 108  | 3   | 0 | 2020/02/06-2020/04/16 |
| 12 |               |          |       |       |                                          |          |      |      |     |   |                       |
| 13 | Yuan L(219)   | Wuhan    | China | 28    | Mean: 29.75y ( $\pm$ 3.5)                | Pregnant | 0.0  | 28   | 15  | 0 | 2020/01/30-2020/03/14 |
| 14 |               |          |       |       |                                          |          |      |      |     |   |                       |
| 15 |               |          |       |       |                                          |          |      |      |     |   |                       |
| 16 | Yue HM(220)   | Gansu    | China | 86    | Median:41y(IQR:31-54.3y)                 | Adult    | 44.2 | 86   | 15  | 0 | 2020/01/21-2020/02/11 |
| 17 |               |          |       |       |                                          |          |      |      |     |   |                       |
| 18 | Zeng J(221)   | Sichuan  | China | 24184 | NA                                       | Adult    | NA   | 226  | 1   | 0 | NA                    |
| 19 |               |          |       |       |                                          |          |      |      |     |   |                       |
| 20 |               |          |       |       |                                          |          |      |      |     |   |                       |
| 21 | Zeng WZ(222)  | Yongzhou | China | 44    | Mean: 39.1y ( $\pm$ 14.5)                | Adult    | 64.0 | 44   | 6   | 0 | 2020/01/21-2020/03/05 |
| 22 |               |          |       |       |                                          |          |      |      |     |   |                       |
| 23 | Zhai HL(223)  | Fuyang   | China | 11    | Mean: 11.76y (range: 0.33-17y)           | Children | 64.0 | 11   | 1   | 0 | 2020/01/22-2020/02/24 |
| 24 |               |          |       |       |                                          |          |      |      |     |   |                       |
| 25 |               |          |       |       |                                          |          |      |      |     |   |                       |
| 26 | Zhan H(224)   | Shiyan   | China | 6     | Median: 8.5y (range: 0.5-11y)            | Children | 50.0 | 6    | 1   | 0 | 2020/2/1              |
| 27 |               |          |       |       |                                          |          |      |      |     |   |                       |
| 28 | Zhan T(225)   | Wuhan    | China | 405   | Median:56y(17-95y)                       | Adult    | 45.9 | 405  | 12  | 0 | 2020/01/12-2020/03/08 |
| 29 |               |          |       |       |                                          |          |      |      |     |   |                       |
| 30 |               |          |       |       |                                          |          |      |      |     |   |                       |
| 31 | Zhang JJ(226) | Beijing  | China | 5     | NA                                       | Adult    | NA   | 5    | 1   | 0 | 2020/01/24-2020/02/29 |
| 32 |               |          |       |       |                                          |          |      |      |     |   |                       |
| 33 | Zhang KY(227) | Kunming  | China | 11    | Mean: 42y (range: 8-67y)                 | Adult    | 45.0 | 11   | 3   | 0 | 2020/01/26-2020/02/20 |
| 34 |               |          |       |       |                                          |          |      |      |     |   |                       |
| 35 |               |          |       |       |                                          |          |      |      |     |   |                       |
| 36 | Zhang L(228)  | Anhui    | China | 33    | Mean:9.59y ( $\pm$ 5.12)                 | Children | 48.5 | 33   | 8   | 0 | till 2020/02/16       |
| 37 |               |          |       |       |                                          |          |      |      |     |   |                       |
| 38 | Zhang R(229)  | Liaoning | China | 2784  | NA                                       | Adult    | 49.0 | 67   | 9   | 0 | 2020/01/22-2020/02/29 |
| 39 |               |          |       |       |                                          |          |      |      |     |   |                       |
| 40 |               |          |       |       |                                          |          |      |      |     |   |                       |
| 41 | Zhang Y(230)  | NA       | China | 41    | Mean:5.93y(range:0.5-14y)                | Children | 73.2 | 41   | 9   | 0 | 2020/01-2020/02       |
| 42 |               |          |       |       |                                          |          |      |      |     |   |                       |
| 43 |               |          |       |       |                                          |          |      |      |     |   |                       |
| 44 |               |          |       |       |                                          |          |      |      |     |   |                       |
| 45 |               |          |       |       |                                          |          |      |      |     |   |                       |
| 46 |               |          |       |       |                                          |          |      |      |     |   |                       |

|    |               |                           |       |     |                            |       |      |     |    |    |                       |
|----|---------------|---------------------------|-------|-----|----------------------------|-------|------|-----|----|----|-----------------------|
| 1  | Zhang YC(231) | Nanjing, Xuzhou           | China | 21  | Median:25y (range: 10-61y) | Adult | 60.0 | 21  | 5  | 0  | 2020/01/25-2020/03/18 |
| 2  |               |                           |       |     |                            |       |      |     |    |    |                       |
| 3  | Zhang YD(232) | Qinghai                   | China | 18  | Range: 7-47y               | Adult | 67.0 | 18  | 7  | 6  | 2020/01/24-2020/02/05 |
| 4  |               |                           |       |     |                            |       |      |     |    |    |                       |
| 5  |               |                           |       |     |                            |       |      |     |    |    |                       |
| 6  | Zhao L(233)   | Shijiazhuang              | China | 30  | NA                         | Adult | 63.0 | 30  | 9  | 0  | 2020/01/21-2020/02-25 |
| 7  |               |                           |       |     |                            |       |      |     |    |    |                       |
| 8  | Zhong ZM(234) | Wuhan, Nanning, Liuzhou   | China | 193 | Mean: 48.1y (range: 3-95y) | Adult | 58.0 | 193 | 46 | 0  | 2020/01/03-2020/03/04 |
| 9  |               |                           |       |     |                            |       |      |     |    |    |                       |
| 10 |               |                           |       |     |                            |       |      |     |    |    |                       |
| 11 | Zhou H(235)   | Qijing                    | China | 13  | Mean: 28y ( $\pm 11.83$ )  | Adult | 46.0 | 13  | 2  | 0  | 2020/01/23-2020/02/27 |
| 12 |               |                           |       |     |                            |       |      |     |    |    |                       |
| 13 | Zhou JL(236)  | Xinyang                   | China | 149 | Mean: 52y ( $\pm 15.48$ )  | Adult | 57.1 | 149 | 10 | 0  | 2020/01/13-2020/03/02 |
| 14 |               |                           |       |     |                            |       |      |     |    |    |                       |
| 15 |               |                           |       |     |                            |       |      |     |    |    |                       |
| 16 | Zhou R(237)   | Guangzhou                 | China | 31  | NA                         | Adult | NA   | 31  | 9  | 0  | 2020/01/23-2020/03/03 |
| 17 |               |                           |       |     |                            |       |      |     |    |    |                       |
| 18 |               | Shanxi, Qinghai, Tibet,   |       |     |                            |       |      |     |    |    |                       |
| 19 | Zhu JF(238)   | Xinjiang, Ningxia, Gansu, | China | 617 | Median:42y(1 to 94 years)  | Adult | 52.0 | 617 | 82 | 0  | 2020/01/21-2020/03/11 |
| 20 |               | Inner Mongolia, Hubei     |       |     |                            |       |      |     |    |    |                       |
| 21 |               |                           |       |     |                            |       |      |     |    |    |                       |
| 22 | Zhu MR(239)   | Shanghai                  | China | 77  | Range: 14-62y              | Adult | 70.1 | 77  | 14 | 0  | 2020/03/14-2020/07/03 |
| 23 |               |                           |       |     |                            |       |      |     |    |    |                       |
| 24 |               |                           |       |     |                            |       |      |     |    |    |                       |
| 25 | Zhu SQ(240)   | Shenzhen                  | China | 417 | Mean: 45.3y (range:1-86y)  | Adult | 47.0 | 417 | 11 | 11 | 2020/01/01-2020/02/14 |



## Reference

1. Abeysuriya S, Wasif S, Counihan C, Shah N, Iliodromiti S, Cutino-Moguel MT, et al. Universal screening for SARS-CoV-2 in pregnant women at term admitted to an East London maternity unit. *European journal of obstetrics, gynecology, and reproductive biology*. 2020;252:444-6.
2. Adedeji IA, Abdu YM, Bashir MF, Adamu AS, Gwarzo GD, Yaro BS, et al. Profile of children with COVID-19 infection: a cross sectional study from North-East Nigeria. *The Pan African medical journal*. 2020;35(Suppl 2):145.
3. Adetola HH, Ishola D, Afolabi MO, Bangura J, Sesay IG, Pearce R, et al. Clinical presentations and management of COVID-19 infected children seen in a district health facility in Kambia, northern Sierra Leone. *The Pan African medical journal*. 2020;37(Suppl 1):28.
4. Aherfi S, Raoult D, La Scola B, Gautret P, Chaudet H. Clusters of COVID-19 associated with Purim celebration in the Jewish community in Marseille, France, March 2020. *International journal of infectious diseases : IJID : official publication of the International Society for Infectious Diseases*. 2020;100:88-94.
5. Almazeedi S, Al-Youha S, Jamal MH, Al-Haddad M, Al-Muhaini A, Al-Sabah S, et al. Characteristics, risk factors and outcomes among the first consecutive 1096 patients diagnosed with COVID-19 in Kuwait. *EclinicalMedicine*. 2020;24:100448.
6. Alshahrani MS, Alnimr A, Alnassri S, Alfarag S, Aljehani Y, Alabdali M. Prevalence of the sars-cov-2 infection among post-quarantine healthcare workers. *Journal of Multidisciplinary Healthcare*. 2020;13:1927-36.
7. Alshukry A, Ali Y, Bader AA, Abbas MB, Dashti AA, Ali H, et al. Clinical characteristics of coronavirus disease 2019 (COVID-19) patients in Kuwait. *PLoS ONE*. 2020;15(11 November):e0242768.
8. Alsofayan YM, Althunayyan SM, Khan AA, Hakawi AM, Assiri AM. Clinical characteristics of COVID-19 in Saudi Arabia: A national retrospective study. *Journal of infection and public health*. 2020;13(7):920-5.
9. Ing AJ, Cocks C, Green JP. COVID-19: in the footsteps of Ernest Shackleton. *Thorax*. 2020;75(8):693-4.
10. Dora AV, Winnett A, Jatt LP, Davar K, Watanabe M, Sohn L, et al. Universal and serial laboratory testing for SARS-CoV-2 at a long-term care skilled nursing facility for veterans—Los Angeles, California, 2020. *Morbidity and Mortality Weekly Report*. 2020;69(21):651.
11. An Y, ROng D, Shan Y. Comparison of chest radiograph images between suspected and confirmed cases of COVID-19. *Journal of Capital Medical University*. 2020;41 (4):608-12.
12. Lombardi A, Consonni D, Carugno M, Bozzi G, Mangioni D, Muscatello A, et al. Characteristics of 1573 healthcare workers who underwent nasopharyngeal swab testing for SARS-CoV-2 in Milan, Lombardy, Italy. *Clinical microbiology and infection*. 2020;26(10):1413. e9-. e13.
13. Antonio-Villa NE, Bello-Chavolla OY, Vargas-Vázquez A, Fermín-Martínez CA, Márquez-Salinas A, Bahena-López JP. Health-care workers with COVID-19 living in Mexico City: clinical characterization and related outcomes. *Clinical infectious diseases : an official publication of the Infectious Diseases Society of America*. 2020.
14. Arima Y, Kutsuna S, Shimada T, Suzuki M, Suzuki T, Kobayashi Y, et al. Severe acute respiratory syndrome coronavirus 2 infection among returnees to Japan from Wuhan, China, 2020. *Emerging infectious diseases*. 2020;26(7):1596.
15. Ashinyo ME, Akoriyea SK, Duti V, Dubik SD, Amegah KE, Kutsoati S, et al. Clinical

1  
2  
3 characteristics, treatment regimen and duration of hospitalization among COVID-19 patients in Ghana:  
4 a retrospective cohort study. *The Pan African medical journal*. 2020;37(Supplement 1):9.

5  
6 16. Atakla HG, Sacca H, Houinato AG, Houinato DS, Noudohounsi MMUD, Salami AY, et al.  
7 COVID-19 infection in pediatric subjects: study of 36 cases in Conakry. *The Pan African medical*  
8 *journal*. 2020;37(Supplement 1):42.

9  
10 17. Backer JA, Klinkenberg D, Wallinga J. Incubation period of 2019 novel coronavirus (2019-nCoV)  
11 infections among travellers from Wuhan, China, 20–28 January 2020. *Eurosurveillance*.  
12 2020;25(5):2000062.

13  
14 18. Ma L, Chen Y, Chen XL. [Management protocol and outcome assessment of ruptured intracranial  
15 aneurysm emergency surgery during coronavirus disease 2019 pandemic]. *Zhonghua yi xue za zhi*.  
16 2020;100(47):3768-74.

17  
18 19. R B, ZH J, H Z, J Z. Analysis on the epidemiological characteristics of an outbreak of coronavirus  
19 disease 2019 (COVID – 19) in Xi'an. *Zhonghua Jibing Kongzhi Zazhi*. 2020;24 (5):567-72.

20  
21 20. SL B, JY W, YQ Z, Y D. Analysis of the first cluster of cases in a family of novel coronavirus  
22 pneumonia in Gansu Province. *Chines Medical association*. 2020.

23  
24 21. Sarangi B, Reddy VS, Oswal JS, Malshe N, Patil A, Chakraborty M, et al. Epidemiological and  
25 clinical characteristics of COVID-19 in Indian children in the initial phase of the pandemic. *Indian*  
26 *pediatrics*. 2020;57(10):914-7.

27  
28 22. Bianco A, Buckley AB, Overbey J, Smilen S, Wagner B, Dinglas C, et al. Testing of Patients and  
29 Support Persons for Coronavirus Disease 2019 (COVID-19) Infection Before Scheduled Deliveries.  
30 *Obstetrics and gynecology*. 2020;136(2):283-7.

31  
32 23. YanFei, Ji P, Liang X. Clinical characteristics of 55 hospitalized patients with COVID-19 in  
33 Wuhan, China. *Journal of Guangxi Medical Univeristy*. 2020;37 (2):338-42.

34  
35 24. Blain H, Giacosa N, Albrand M, Miot S, Rolland Y, Tuailon E, et al. Efficacy of a Test-Retest  
36 Strategy in Residents and Health Care Personnel of a Nursing Home Facing a COVID-19 Outbreak.  
37 *Journal of the American Medical Directors Association*. 2020;21(7):933-6.

38  
39 25. Böhmer MM, Buchholz U, Corman VM, Hoch M, Katz K, Marosevic DV, et al. Investigation of a  
40 COVID-19 outbreak in Germany resulting from a single travel-associated primary case: a case series.  
41 *The Lancet Infectious Diseases*. 2020;20(8):920-8.

42  
43 26. Breslin N, Baptiste C, Gyamfi-Bannerman C, Miller R, Martinez R, Bernstein K, et al.  
44 Coronavirus disease 2019 infection among asymptomatic and symptomatic pregnant women: two  
45 weeks of confirmed presentations to an affiliated pair of New York City hospitals. *American journal of*  
46 *obstetrics & gynecology MFM*. 2020;2(2):100118.

47  
48 27. Bruminhent J, Kiertiburanakul S, Ruangsubvilai N, Nabhindhakara J, Ingsathit A. Clinical  
49 characteristics and risk factors for coronavirus disease 2019 (COVID-19) among patients under  
50 investigation in Thailand. *PLoS ONE*. 2020;15(9 September):e0239250.

51  
52 28. Cai J, Wang X, Zhao J, Ge Y, Xu J, Tian H, et al. Comparison of Clinical and Epidemiological  
53 Characteristics of Asymptomatic and Symptomatic SARS-CoV-2 Infection in Children. *Virologica*  
54 *Sinica*. 2020;35(6):803-10.

55  
56 29. Cao J, Wang W, Chen T. Comparative study on CT manifestation in COVID-19 between imported  
57 patients and teh second-generation cases. *Medical Journal West China*. 2020;32 (5):628-32.

58  
59 30. Felice C, Di Tanna GL, Zanusi G, Grossi U. Impact of COVID-19 outbreak on healthcare workers  
60 in Italy: results from a national E-survey. *Journal of community health*. 2020;45(4):675-83.

31. Chan JF-W, Yip CC-Y, To KK-W, Tang TH-C, Wong SC-Y, Leung K-H, et al. Improved

- 1  
2  
3  
4  
5  
6  
7  
8  
9  
10  
11  
12  
13  
14  
15  
16  
17  
18  
19  
20  
21  
22  
23  
24  
25  
26  
27  
28  
29  
30  
31  
32  
33  
34  
35  
36  
37  
38  
39  
40  
41  
42  
43  
44  
45  
46  
47  
48  
49  
50  
51  
52  
53  
54  
55  
56  
57  
58  
59  
60
- molecular diagnosis of COVID-19 by the novel, highly sensitive and specific COVID-19-RdRp/Hel real-time reverse transcription-PCR assay validated in vitro and with clinical specimens. *Journal of clinical microbiology*. 2020;58(5).
32. Argun Barış S, Coşkun İ S, Selvi G, Boyacı H, Başığit İ. Case Series of COVID-19 Presenting with Massive Hemoptysis. *Turkish thoracic journal*. 2020;21(6):454-6.
33. J C. Asymptomatic SARS-CoV-2 infection in children: a clinical analysis of 20 cases. *Chinese Journal of Contemporary Pediatrics*. 2020;22 (5):414-8.
34. Chen T, Jinag Z, XU W, Zhang Q. Clinical features and CT imaging analysis of 76 patients with Corona Virus Disease 2019. *Journal of Jinan University (Natural Science & Medicine Edition)*. 2020;41 (2):157-62.
35. Chen Y, Wang A, KQ D, HB W, W J. The epidemiological characteristics of infection in close contacts of COVID-19 in Ningbo City. *Chinese Journal of Epidemiology*. 2020;41 (5):668-72.
36. Chen Y, Shui L, Pang X, Mu H, Wang J, Lang C, et al. Clinical features of coronavirus disease 2019 in Northeast area of Chongqing: analysis of 143 cases. *J Third Mil Med Univ*. 2020;42:549-54.
37. Cheng Z, Li Y, Duan Y. A preliminary study on the dynamic imaging of chest high resolution CT in patients with mild COVID-19. *Chinese Journal of Radiology*. 2020;54 (6):548-51.
38. Choe PG, Kang CK, Suh HJ, Jung J, Song K-H, Bang JH, et al. Waning antibody responses in asymptomatic and symptomatic SARS-CoV-2 infection. *Emerging infectious diseases*. 2021;27(1):327-9.
39. Team C-N. Australia: Epidemiology Report 7: Reporting week ending 19:00 AEDT 14 March 2020. 2020.
40. Dai Y, Tang N. Clinical analysis of 11 pediatric patients with 2019 corona virus disease in Guangxi. *China Journal of Academic Journal Electronic Publishing House*. 2020;13:1149-52.
41. Loconsole D, Caselli D, Centrone F, Morcavallo C, Campanella S, Aricò M, et al. SARS-CoV-2 Infection in children in southern Italy: a descriptive case series. *International Journal of Environmental Research and Public Health*. 2020;17(17):6080.
42. Ding Y, Huang Z. Clinical and imaging characteristics of corona virus disease 2019 (COVID-2019). *Radial Practice*. 2020;35 (2):281-5.
43. Dong X, Cao Y, Lu X. Eleven faces of coronavirus disease 2019. *Allergy*. 2020.
44. Dong X, Li J, Bai J, Liu Z, Zhou P, Gao L, et al. Epidemiological characteristics of confirmed COVID-19 cases in Tianjin. *Zhonghua liu xing bing xue za zhi= Zhonghua liuxingbingxue zazhi*. 2020;41(5):638-42.
45. Yuying D, Qiandong F, Yueping W, Yulai L, Junpeng X, Jing Y, et al. Analysis in nucleic acid test results of patients with coronavirus disease 2019 in Yangzhou City of Jiangsu Province. *Journal of Clinical in Practice*. 2020;24(5):6-9.
46. Erinoso OA, Wright KO, Anya S, Adejumo O, Abdur-Razzaq H, Lajide D, et al. Clinical characteristics, predictors of symptomatic coronavirus disease 2019 and duration of hospitalisation in a cohort of 632 Patients in Lagos State, Nigeria. *The Nigerian postgraduate medical journal*. 2020;27(4):285-92.
47. Eythorsson E, Helgason D, Ingvarsson RF, Bjornsson HK, Olafsdottir LB, Bjarnadottir V, et al. Clinical spectrum of coronavirus disease 2019 in Iceland: Population based cohort study. *The BMJ*. 2020;371:m4529.
48. Fakiri KE, Nassih H, Sab IA, Draiss G, Bouskraoui M. Epidemiology and Clinical Features of Coronavirus Disease 2019 in Moroccan Children. *Indian pediatrics*. 2020;57(9):808-10.

- 1  
2  
3 49. Fan Y, Chang H. Pathogen detection strategies in different stage of COVID-19 in Lu'an City. *Anhui Journal of Preventive Medicine*. 2020;26:250-2.
- 4  
5  
6 50. Feaster M, Goh Y-Y. High proportion of asymptomatic SARS-CoV-2 infections in 9 long-term  
7 care facilities, Pasadena, California, USA, April 2020. *Emerging Infectious Diseases*.  
8 2020;26(10):2416-9.
- 9  
10 51. Feng X. An analysis of 52 cases with coronavirus disease 2019 in Jiangling District, Jingzhou.  
11 *Jiangsu Medical Journal*. 2020;24 (5):6-9.
- 12  
13 52. Foster CE, Marquez L, Davis AL, Tocco E, Koy TH, Campbell JR, et al. A Surge in Pediatric  
14 Coronavirus Disease 2019 Cases: The Experience of Texas Children's Hospital from March to June  
15 2020. *Journal of the Pediatric Infectious Diseases Society*. 2020.
- 16  
17 53. Maechler F, Gertler M, Hermes J, van Loon W, Schwab F, Piening B, et al. Epidemiological and  
18 clinical characteristics of SARS-CoV-2 infections at a testing site in Berlin, Germany, March and April  
19 2020—a cross-sectional study. *Clinical Microbiology and Infection*. 2020;26(12):1685. e7-. e12.
- 20  
21 54. Gao H. Epidemiological characteristics of coronavirus disease 2019 outbreak in Ganzr Tibetan  
22 Autonomous Prefecture, Sichuan. *Disease Surveillance*. 2020;35 (9):793-7.
- 23  
24 55. Gao T, He X. Clinical characteristics of COVID-19: an analysis of 11 cases. *China Journal of  
25 Clinical Infectious Disease*. 2020;13 (1):25-8.
- 26  
27 56. Gautret P, Lagier J-C, Parola P, Meddeb L, Mailhe M, Doudier B, et al. Hydroxychloroquine and  
28 azithromycin as a treatment of COVID-19: results of an open-label non-randomized clinical trial.  
29 *International journal of antimicrobial agents*. 2020;56(1):105949.
- 30  
31 57. Livingston G, Rostampour H, Gallagher P, Kalafatis C, Shastri A, Huzzey L, et al. Prevalence,  
32 management, and outcomes of SARS-CoV-2 infections in older people and those with dementia in  
33 mental health wards in London, UK: a retrospective observational study. *The Lancet Psychiatry*.  
34 2020;7(12):1054-63.
- 35  
36 58. Grados IZ, Zavala GB, Yauri MA, Loli LP, Sembrera E, Vasquez A, et al. Characteristics of  
37 SARS-CoV-2 infection in pregnant and puerperal women at Callao national hospital, Peru. *Revista  
38 Peruana de Ginecología y Obstetricia*. 2020;66(3).
- 39  
40 59. Graham NSN, Lai H, Sharp DJ, Junghans C, Downes R, Sendall C, et al. SARS-CoV-2 infection,  
41 clinical features and outcome of COVID-19 in United Kingdom nursing homes. *Journal of Infection*.  
42 2020;81(3):411-9.
- 43  
44 60. Grechukhina O, Greenberg V, Lundsberg LS, Deshmukh U, Cate J, Lipkind HS, et al.  
45 Coronavirus disease 2019 pregnancy outcomes in a racially and ethnically diverse population. *Am J  
46 Obstet Gynecol MFM*. 2020;2(4):100246.
- 47  
48 61. Kim G-u, Kim M-J, Ra SH, Lee J, Bae S, Jung J, et al. Clinical characteristics of asymptomatic  
49 and symptomatic patients with mild COVID-19. *Clinical microbiology and infection*. 2020;26(7):948.  
50 e1-. e3.
- 51  
52 62. Guo C-X, Yang G-P, He L, Bo T, Yin J-Y, Meng X-G, et al. Epidemiological and clinical features  
53 of pediatric COVID-19. *BMC Medicine*. 2020;18(1):250.
- 54  
55 63. Han R, Ma J. Clinical characteristics of 108 patients with COVID – 19 infection. *Practice Prevent  
56 Medicine*. 2020;27 (9):1040-3.
- 57  
58 64. He M, Wang C, Xu L, Zhang H, Liu Y, Zhao Y, et al. Epidemiological and clinical characteristics  
59 of 35 children with COVID-19 in Beijing, China. *Pediatric Investigation*. 2020;4(4):230-5.
- 60  
65. He W, Liang Z. Epidemiological characteristics of 101 cases of new coronavirus infection in  
Zhuzhou City. *Jiangsu Journal of Preventive Medicine*. 2020;31 (6):644-5.

- 1  
2  
3  
4 66. Hu S, Xu Q, Luo K. Epidemiological characteristics of patients with coronavirus disease 2019 in  
5 Hunan province. *Practice Prevent Medicine*. 2020;27 (4):385-8.
- 6 67. Zou X, Wu YS, Liu XJ, Huang SL, He JF, Zhao J, et al. [Evaluation of the emergency response  
7 strategies and measures on the epidemic of COVID-19 in Shenzhen, China]. *Zhonghua liu xing bing*  
8 *xue za zhi = Zhonghua liuxingbingxue zazhi*. 2020;41(8):1225-30.
- 9  
10 68. Huerta Saenz IH, Elías Estrada JC, Campos Del Castillo K, Muñoz Taya R, Coronado JC.  
11 Características materno perinatales de gestantes COVID-19 en un hospital nacional de Lima, Perú.  
12 *Revista Peruana de Ginecología y Obstetricia*. 2020;66(2).
- 13  
14 69. Ipekci A, Akdeniz YS, Ozkan S, Tutar O, Sirolu S, Simsek O. The clinical and computed  
15 tomography findings of patients with COVID-19. *Signa Vitae*. 2020;16(1):173-8.
- 16  
17 70. Petersen I, Phillips A. Three quarters of people with SARS-CoV-2 infection are asymptomatic:  
18 analysis of English household survey data. *Clinical Epidemiology*. 2020;12:1039.
- 19  
20 71. Singer JS, Cheng EM, Murad DA, Maurice AdS, Hines OJ, Uslan DZ, et al. Low prevalence  
21 (0.13%) of COVID-19 infection in asymptomatic pre-operative/pre-procedure patients at a large,  
22 academic medical center informs approaches to perioperative care. *Surgery*. 2020;168(6):980-6.
- 23  
24 72. Jeong SJ, Sohn Y, Hyun JH, Baek YJ, Cho Y, Kim JH, et al. Clinical characteristics and online  
25 mental health care of asymptomatic or mildly symptomatic patients with coronavirus disease 2019.  
26 *PLoS ONE*. 2020;15(11 November):e0242130.
- 27  
28 73. Jha S, Soni A, Siddiqui S, Batra N, Goel N, Dey S, et al. Prevalence of Flu-like Symptoms and  
29 COVID-19 in Healthcare Workers from India. *The Journal of the Association of Physicians of India*.  
30 2020;68(7):27-9.
- 31  
32 74. Zhang JZ, Zhou P, Han DB, Wang WC, Cui C, Zhou R, et al. [Investigation on a cluster epidemic  
33 of COVID-19 in a supermarket in Liaocheng, Shandong province]. *Zhonghua liu xing bing xue za zhi*  
34 *= Zhonghua liuxingbingxue zazhi*. 2020;41(12):2024-8.
- 35  
36 75. Ji T, Chen H-L, Xu J, Wu L-N, Li J-J, Chen K, et al. Lockdown contained the spread of 2019  
37 novel coronavirus disease in Huangshi city, China: Early epidemiological findings. *Clinical Infectious*  
38 *Diseases*. 2020;71(6):1454-60.
- 39  
40 76. Jia C, Zhao D, Feng J. Analysis of imaging feature and evolvement characteristic of severe  
41 COVID-19. *Beijing Medical Journal*. 2020:489-92.
- 42  
43 77. Jiang C, Hu M, Wen L, Wang Y, Li G, Wen C, et al. Antibody seroconversion in asymptomatic  
44 and symptomatic patients infected with severe acute respiratory syndrome coronavirus 2  
45 (SARS-CoV-2). *Clinical and Translational Immunology*. 2020;9(9):e1182.
- 46  
47 78. Jiang R. CT findings and outcome with family clustering COVID-19 in 8 families. *Electronic*  
48 *Journal of Emerging Infectious Diseases*. 2020;5 (2):87-90.
- 49  
50 79. Jibrin YB, Maigari IM, Dunga JA, Umar MS, Mohammed A, Okwong OK, et al. Clinical and  
51 laboratory characteristics of COVID-19 among adult patients admitted to the isolation centre at  
52 Abubakar Tafawa Balewa Teaching Hospital Bauchi, Northeast Nigeria. *The Pan African medical*  
53 *journal*. 2020;37(Supplement 1):27.
- 54  
55 80. Jin M, Shen J, Fu Y. Epidemiological characteristics of coronavirus disease 2019 in Huzhou.  
56 *Preventive Medicine*. 2020;32 (5):433-6.
- 57  
58 81. Jung C-Y, Chang TI, Park H, Kim DW, Choi YJ, Kim SW. Clinical Characteristics of  
59 Asymptomatic Patients with COVID-19: A Nationwide Cohort Study in South Korea. *International*  
60 *Journal of Infectious Diseases*. 2020;99:266-8.
82. Kang M, Wu J, Ma W, He J, Lu J, Liu T, et al. Evidence and characteristics of human-to-human

- transmission of SARS-CoV-2. medRxiv. 2020:2020.02.03.20019141.
83. Kasper MR, Gillingham BL, Geibe JR, Riegodedios AJ, Luse T, von Thun AM, et al. An outbreak of covid-19 on an aircraft carrier. *New England Journal of Medicine*. 2020;383(25):2417-26.
84. Bai K, Liu W, Liu C, Fu Y, Hu J, Qin Y, et al. Clinical analysis of 25 COVID-19 infections in children. *The Pediatric infectious disease journal*. 2020;39(7):e100-e3.
85. Kenu E, Odikro MA, Malm KL, Asiedu-Bekoe F, Noora CL, Frimpong JA, et al. Epidemiology of COVID-19 outbreak in Ghana, 2020. *Ghana Med J*. 2020;54(4):5-15.
86. Ki M. Epidemiologic characteristics of early cases with 2019 novel coronavirus (2019-nCoV) disease in Korea. *Epidemiology and health*. 2020;42.
87. Kirenga B, Muttamba W, Kayongo A, Mugenyi L, Nantanda R, Kimuli I, et al. Characteristics and outcomes of admitted patients infected with SARS-CoV-2 in Uganda. *BMJ Open Respiratory Research*. 2020;7(1):000646.
88. Kong W, Wang Y, Pu H, Hu J, Chughtai A. Comparison of clinical and epidemiological characteristics of asymptomatic and symptomatic SARS-CoV-2 infection: A multi-center study in Sichuan Province, China. *Travel Medicine and Infectious Disease*. 2020;37:101754.
89. Krajcar N, Marić LS, Šurina A, Filipović SK, Trkulja V, Roglić S, et al. Epidemiological and clinical features of Croatian children and adolescents with a PCR-confirmed coronavirus disease 2019: differences between the first and second epidemic wave. *Croatian medical journal*. 2020;61(6):491.
90. Meyers KJ, Jones ME, Botros FT, Knorr J, Manner DH, Woodward B, et al. A cross-sectional community-based observational study of asymptomatic SARS-CoV-2 prevalence in the greater Indianapolis area. *Journal of medical virology*. 2020;92(11):2874-9.
91. Kumar R, Bhattacharya B, Meena VP, Aggarwal A, Tripathi M, Soneja M, et al. Characteristics and outcomes of 231 COVID-19 cases admitted at a tertiary facility in India: An observational cohort study. *Journal of family medicine and primary care*. 2020;9(12):6267.
92. Ladhani SN, Chow JY, Janarthanan R, Fok J, Crawley-Boevey E, Vusirikala A, et al. Investigation of SARS-CoV-2 outbreaks in six care homes in London, April 2020. *EClinicalMedicine*. 2020;26:100533.
93. Lai X, Wang M, Qin C, Tan L, Ran L, Chen D, et al. Coronavirus disease 2019 (COVID-2019) infection among health care workers and implications for prevention measures in a tertiary hospital in Wuhan, China. *JAMA network open*. 2020;3(5):e209666-e.
94. Le TQM, Takemura T, Moi ML, Nabeshima T, Nguyen LKH, Hoang VMP, et al. Severe acute respiratory syndrome coronavirus 2 shedding by travelers, Vietnam, 2020. *Emerging infectious diseases*. 2020;26(7):1624.
95. Lee Y-H, Hong CM, Kim DH, Lee TH, Lee J. Clinical course of asymptomatic and mildly symptomatic patients with coronavirus disease admitted to community treatment centers, South Korea. *Emerging infectious diseases*. 2020;26(10):2346.
96. Lei Y. Characteristics of cluster epidemic of 2019 novel coronavirus disease in Guizhou province. *China Journal of Public Health*. 2020;36 (4):493-7.
97. Lewis M, Sanchez R, Auerbach S, Nam D, Lanier B, Taylor J, et al. COVID-19 outbreak among college students after a spring break trip to Mexico—Austin, Texas, March 26–April 5, 2020. 2020.
98. Lin C, Xiang J, Yan M, Li H, Huang S, Shen C. Comparison of throat swabs and sputum specimens for viral nucleic acid detection in 52 cases of novel coronavirus (SARS-Cov-2)-infected pneumonia (COVID-19). *Clinical Chemistry and Laboratory Medicine (CCLM)*. 2020;58(7):1089-94.
99. Li J, Thoon KC, Chong CY, Maiwald M, Kam KQ, Nadua K, et al. Comparative analysis of

- 1  
2  
3 symptomatic and asymptomatic SARS-CoV-2 infection in children. *Ann Acad Med Singap.* 2020;49(8):530-7.  
4  
5  
6 100. Li W, Cui H, Li K, Fang Y, Li S. Chest computed tomography in children with COVID-19  
7 respiratory infection. *Pediatric radiology.* 2020:1-4.  
8  
9 101. Li Y, Xia L. Coronavirus disease 2019 (COVID-19): role of chest CT in diagnosis and  
10 management. *American Journal of Roentgenology.* 2020;214(6):1280-6.  
11  
12 102. Li Y, Deng W, Xiong H, Li H, Chen Z, Nie Y, et al. Immune-related factors associated with  
13 pneumonia in 127 children with coronavirus disease 2019 in Wuhan. *Pediatric Pulmonology.*  
14 2020;55(9):2354-60.  
15  
16 103. Li Y, Shi J, Xia J, Duan J, Chen L, Yu X, et al. Asymptomatic and symptomatic patients with  
17 non-severe coronavirus disease (COVID-19) have similar clinical features and virological courses: a  
18 retrospective single center study. *Frontiers in microbiology.* 2020;11:1570.  
19  
20 104. Liao X. Chest CT features comparison between COVID-19 and bacterial pneumonia. *Medical*  
21 *Journal of Wuhan University.* 2020;41 (3).  
22  
23 105. Lin S, Pan H, Wu H, Yu X, Cui P, Han R, et al. Epidemiological and clinical characteristics of 161  
24 discharged cases with coronavirus disease 2019 in Shanghai, China. *BMC Infectious Diseases.*  
25 2020;20(1):1-10.  
26  
27 106. Lin X, Liu Z. Clinicot analysis of 23 patients with new coronavirus infection. *Journal of Baotou*  
28 *Medical College.* 2020;36 (10):20-3.  
29  
30 107. Lin Z, Shao Y, QP P. Clinical Analysis of 2019 Novel Coronavirus Disease in 205 Cases. *Chinese*  
31 *Journal of Dialysis and Artifucak Organs.* 2020;31 (1):6-9.  
32  
33 108. Liu B, Liang Q. Clinical analysis of 9 imported cases of COVID-19. *Medical Journal of National*  
34 *Defending Forces in Southwest China.* 2020;30 (10):926-9.  
35  
36 109. Liu B, Yang Q, Zhao L, Xie W, Si X. Epidemiological characteristics of COVID-19 patients in  
37 convalescence period. *Epidemiology & Infection.* 2020;148.  
38  
39 110. Liu B, Qi X, M J. Epidemiological characteristics of imported COVID-19 cases from abroad to  
40 Zhejiang Province. *Preventive Medicine.* 2020;32 (6):550-4.  
41  
42 111. Liu D, Li L, Wu X, Zheng D, Wang J, Yang L, et al. Pregnancy and perinatal outcomes of women  
43 with coronavirus disease (COVID-19) pneumonia: a preliminary analysis. *American journal of*  
44 *roentgenology.* 2020;215(1):127-32.  
45  
46 112. Liu F, Xu A, Zhang Y, Xuan W, Yan T, Pan K, et al. Patients of COVID-19 may benefit from  
47 sustained lopinavir-combined regimen and the increase of eosinophil may predict the outcome of  
48 COVID-19 progression. *International Journal of Infectious Diseases.* 2020;95:183-91.  
49  
50 113. Liu F, Lan W, Gan Q. Clinical and CT features of coronavirus disease in pregnant women.  
51 *Radiologic Practice.* 2020;35 (4):417-20.  
52  
53 114. Liu G. Analysis of the characteristics of the novel coronavirus pneumonia in Ningxia. *Journal of*  
54 *Ningxia Medical University.* 2020;42 (2):109-13.  
55  
56 115. Liu M, Song Z, Xiao K. High-resolution computed tomography manifestations of 5 pediatric  
57 patients with 2019 novel coronavirus. *Journal of computer assisted tomography.* 2020.  
58  
59 116. Liu X. Report of COVID-19 family clustering epidemic caused by asymptomatic infection.  
60 *Chinese Journal of Public Health.* 2020;36 (3):282-4.  
117. Liu X, Sun Y. Epidemiological features of COVID-19 in women and children in Heifei City.  
*Anhui Journal of Preventive Mendicine.* 2020;26 (6):415-7.  
118. Liu Y, Chen H, Tang K, Guo Y. Clinical manifestations and outcome of SARS-CoV-2 infection

- during pregnancy. *J infect.* 2020;10.
119. Liu Y, Yang Y, Zhang C, Huang F, Wang F, Yuan J, et al. Clinical and biochemical indexes from 2019-nCoV infected patients linked to viral loads and lung injury. *Science China Life Sciences.* 2020;63(3):364-74.
120. Liu Z, Su B, Wu J. Investigation and analysis of a family cluster of COVID – 19 cases. *Chinese Journal of Disease Control & Prevention.* 2020;24 (5).
121. Lu R, Qin J, Wu Y, Wang J, Huang S, Tian L, et al. Epidemiological and clinical characteristics of COVID-19 patients in Nantong, China. *The Journal of Infection in Developing Countries.* 2020;14(05):440-6.
122. Lu X, Zhang L, Du H, Zhang J, Li YY, Qu J, et al. SARS-CoV-2 infection in children. *New England Journal of Medicine.* 2020;382(17):1663-5.
123. Lu Y, Wen H, Rong D, Zhou Z, Liu H. Clinical characteristics and radiological features of children infected with the 2019 novel coronavirus. *Clinical radiology.* 2020;75(7):520-5.
124. Rivett L, Sridhar S, Sparkes D, Routledge M, Jones NK, Forrest S, et al. Screening of healthcare workers for SARS-CoV-2 highlights the role of asymptomatic carriage in COVID-19 transmission. *Elife.* 2020;9:e58728.
125. Luo S, Liu W, Liu Z. Confirmed asymptomatic carrier of SARS-CoV-2. 2020.
126. Arons MM, Hatfield KM, Reddy SC, Kimball A, James A, Jacobs JR, et al. Presymptomatic SARS-CoV-2 infections and transmission in a skilled nursing facility. *New England journal of medicine.* 2020;382(22):2081-90.
127. Ma M, Ma X. Epidemiological characteristics of COVID-19 in Guangzhou. *South China Journal of Preventive Medicine.* 2020;46 (4):380-4.
128. Ma Y, Xu Q-n, Wang F-L, Ma X-m, Wang X-Y, Zhang X-G, et al. Characteristics of asymptomatic patients with SARS-CoV-2 infection in Jinan, China. *Microbes and infection.* 2020;22(4-5):212-7.
129. Ma Y. Clinical features of children with SARS-CoV-2 infection: an analysis of 115 cases. *Chinese Journal of Contemporary Pediatrics.* 2020;22 (4):14.
130. MacIntyre CR. On a knife's edge of a COVID-19 pandemic: is containment still possible. *Public Health Res Pract.* 2020;30(1):3012000.
131. Patel MC, Chaisson LH, Borgetti S, Burdsall D, Chugh RK, Hoff CR, et al. Asymptomatic SARS-CoV-2 infection and COVID-19 mortality during an outbreak investigation in a skilled nursing facility. *Clinical Infectious Diseases.* 2020;71(11):2920-6.
132. Martin C, Montesinos I, Dauby N, Gilles C, Dahma H, Van Den Wijngaert S, et al. Dynamics of SARS-CoV-2 RT-PCR positivity and seroprevalence among high-risk healthcare workers and hospital staff. *Journal of Hospital Infection.* 2020;106(1):102-6.
133. Maru S, Patil U, Carroll-Bennett R, Baum A, Bohn-Hemmerdinger T, Ditchik A, et al. Universal screening for sars-cov-2 infection among pregnant women at Elmhurst hospital center, Queens, New York. *PloS one.* 2020;15(12):e0238409.
134. McMichael TM, Currie DW, Clark S, Pogosjans S, Kay M, Schwartz NG, et al. Epidemiology of Covid-19 in a long-term care facility in King County, Washington. *New England Journal of Medicine.* 2020;382(21):2005-11.
135. Mei X, Zhang Y, Zhu H, Ling Y, Zou Y, Zhang Z, et al. Observations about symptomatic and asymptomatic infections of 494 patients with COVID-19 in Shanghai, China. *American Journal of Infection Control.* 2020;48(9):1045-50.



- 1  
2  
3  
4  
5  
6  
7  
8  
9  
10  
11  
12  
13  
14  
15  
16  
17  
18  
19  
20  
21  
22  
23  
24  
25  
26  
27  
28  
29  
30  
31  
32  
33  
34  
35  
36  
37  
38  
39  
40  
41  
42  
43  
44  
45  
46  
47  
48  
49  
50  
51  
52  
53  
54  
55  
56  
57  
58  
59  
60
136. Fassett MJ, Lurvey LD, Yasumura L, Nguyen M, Colli JJ, Volodarskiy M, et al. Universal SARS-Cov-2 screening in women admitted for delivery in a large managed care organization. *American journal of perinatology*. 2020;37(11):1110.
137. Bielecki M, Züst R, Siegrist D, Meyerhofer D, Cramer GAG, Stanga Z, et al. Social distancing alters the clinical course of COVID-19 in young adults: A comparative cohort study. *Clinical infectious diseases*. 2021;72(4):598-603.
138. Miyamae Y, Hayashi T, Yonezawa H, Fujihara J, Matsumoto Y, Ito T, et al. Duration of viral shedding in asymptomatic or mild cases of novel coronavirus disease 2019 (COVID-19) from a cruise ship: A single-hospital experience in Tokyo, Japan. *International Journal of Infectious Diseases*. 2020;97:293-5.
139. Ahmed MA, Colebunders R, Fodjo JNS. Evidence for significant COVID-19 community transmission in Somalia using a clinical case definition. *International Journal of Infectious Diseases*. 2020;98:206-7.
140. Moon SS, Park J, Lee K, Yun S, Lee YS, Lee DS. Clinical Characteristics and Mortality Predictors of COVID-19 Patients Hospitalized at Nationally-Designated Treatment Hospitals. *Journal of Korean medical science*. 2020;35(36):e328.
141. Moriarty LF, Plucinski MM, Marston BJ, Kurbatova EV, Knust B, Murray EL, et al. Public health responses to COVID-19 outbreaks on cruise ships—worldwide, February–March 2020. *Morbidity and Mortality Weekly Report*. 2020;69(12):347-52.
142. Nagler AR, Goldberg ER, Agüero-Rosenfeld ME, Cangiarella J, Kalkut G, Monahan CR, et al. Early results from SARS-CoV-2 PCR testing of healthcare workers at an Academic Medical Center in New York City. *Clinical Infectious Diseases*. 2020.
143. Parri N, Masi S, Magista AM, Marchetti F, Cantoni B, Arrighini A, et al. Characteristic of COVID-19 infection in pediatric patients: early findings from two Italian Pediatric Research Networks. *European journal of pediatrics*. 2020;179(8):1315-23.
144. Niu Y, Wang J. Clinical Characteristics and Prevention of COVID-19 in Suqian. *Linchuang Yanjiu*. 2020;28 (5):1-3.
145. Oduro-Mensah E, Tetteh J, Adomako I, Adjei-Mensah E, Yawson AE, Owoo C, et al. Clinical features of COVID-19 in Ghana: symptomatology, illness severity and comorbid non-communicable diseases. *Ghana medical journal*. 2020;54(4 Supplement):23-32.
146. Ou J, Ye W, Zhang K. Epidemiological characteristics of COVID-19 in Fujian Province. *China CHinese Journal of Zoonoses*. 2020;36 (5):366-71.
147. Pan X, Z H. Analysis on Chinese medical clinical characteristics of 64 patients with common type COVID-19. *Journal of Wenzhou Medical University*. 2020;50 (3):187-90.
148. Pérez-García F, Pérez-Zapata A, Arcos N, De la Mata M, Ortiz M, Simón E, et al. Severe acute respiratory coronavirus virus 2 (SARS-CoV-2) infection among hospital workers in a severely affected institution in Madrid, Spain: A surveillance cross-sectional study. *Infection control and hospital epidemiology*. 2020:1-7.
149. Pongpirul WA, Mott JA, Woodring JV, Uyeki TM, MacArthur JR, Vachiraphan A, et al. Clinical characteristics of patients hospitalized with coronavirus disease, Thailand. *Emerging infectious diseases*. 2020;26(7):1580-5.
150. Pongpirul WA, Wiboonchutikul S, Charoenpong L, Panitantum N, Vachiraphan A, Uttayamakul S, et al. Clinical course and potential predictive factors for pneumonia of adult patients with coronavirus disease 2019 (COVID-19): A retrospective observational analysis of 193 confirmed cases in Thailand.

- 1  
2  
3 PLoS Neglected Tropical Diseases. 2020;14(10):1-17.
- 4 151. Qiu C, Deng Z, Deng Y, Wang H, Zhao X, Zhou J, et al. Transmission and clinical characteristics  
5 of coronavirus disease 2019 in 104 outside-Wuhan patients, China. *Journal of Medical Virology*.  
6 2020;92(10):2027-35.
- 7 152. Redditt V, Wright V, Rashid M, Male R, Bogoch I. Outbreak of SARS-CoV-2 infection at a large  
8 refugee shelter in Toronto, April 2020: a clinical and epidemiologic descriptive analysis. *CMAJ open*.  
9 2020;8(4):E819-E24.
- 10 153. Shmakov RG, Prikhodko A, Polushkina E, Shmakova E, Pyregov A, Bychenko V, et al. Clinical  
11 course of novel COVID-19 infection in pregnant women. *The Journal of Maternal-Fetal & Neonatal*  
12 *Medicine*. 2020:1-7.
- 13 154. Rubbi I, Pasquinelli G, Brighenti A, Fanelli M, Gualandi P, Nanni E, et al. Healthcare personnel  
14 exposure to covid-19: An observational study on quarantined positive workers. *Acta Biomedica*.  
15 2020;91(12-S):1-14.
- 16 155. Mattar S, Martinez-Bravo C, Rivero R, Contreras H, Faccini-Martínez ÁA, Guzman-Teran C, et al.  
17 Epidemiological and viral features of a cohort of SARS-CoV-2 symptomatic and asymptomatic  
18 individuals in an area of the Colombian Caribbean. *Annals of Clinical Microbiology and*  
19 *Antimicrobials*. 2020;19(1):1-6.
- 20 156. Kim SE, Jeong HS, Yu Y, Shin SU, Kim S, Oh TH, et al. Viral kinetics of SARS-CoV-2 in  
21 asymptomatic carriers and presymptomatic patients. *International Journal of Infectious Diseases*.  
22 2020;95:441-3.
- 23 157. Samrah SM, Ibnian AM, Momany SM, Al-Ali M, Khassawneh BY, Al-Mistarehi A-HW, et al.  
24 COVID-19 outbreak in Jordan: Epidemiological features, clinical characteristics, and laboratory  
25 findings. *Annals of Medicine and Surgery*. 2020;57:103-8.
- 26 158. She X. Treatment analysis for the first 9 cases of pneumonia infected by novel coronavirus in  
27 Suining area. 2020;17 (2):52-5.
- 28 159. Son H, Lee H, Lee M, Eun Y, Park K, Kim S, et al. Epidemiological characteristics of and  
29 containment measures for COVID-19 in Busan, Korea. *Epidemiology and health*. 2020;42.
- 30 160. Song W, Li J, Zou N, Guan W, Pan J, Xu W. Clinical features of pediatric patients with  
31 coronavirus disease (COVID-19). *Journal of Clinical Virology*. 2020;127:104377.
- 32 161. Song YS, Hao YB, Liu WW, Zhang SS, Wang P, Fan TL. Clinical features of 17 patients with  
33 2019-nCoV. *European review for medical and pharmacological sciences*. 2020;24(20):10896-901.
- 34 162. Spiteri G, Fielding J, Diercke M, Campese C, Enouf V, Gaymard A, et al. First cases of  
35 coronavirus disease 2019 (COVID-19) in the WHO European Region, 24 January to 21 February 2020.  
36 *Eurosurveillance*. 2020;25(9):2000178.
- 37 163. Sun D. Clinical analysis of 30 cases of new coronavirus pneumonia. *Zhejiang Clinical Medical*  
38 *Journal*. 2020;22 (3):354-6.
- 39 164. Sun W, Ling F, Pan J, Cai J, Miao Z, Liu S, et al. Epidemiological characteristics of 2019 novel  
40 coronavirus family clustering in Zhejiang Province. *Zhonghua yu Fang yi xue za zhi [Chinese Journal*  
41 *of Preventive Medicine]*. 2020;54:E027-E.
- 42 165. Sun Z, Zhang Y, Yang J. Common Novel Coronavirus Pneumonia (COVID – 19): Clinical and  
43 Imaging Features. *Hebei Medicine*. 2020;26 (6):908-12.
- 44 166. Teng M, Tang SY, Koh CJ. Endoscopy during COVID-19 pandemic: An overview of infection  
45 control measures and practical application. *World journal of gastrointestinal endoscopy*.  
46 2020;12(9):256-65.
- 47  
48  
49  
50  
51  
52  
53  
54  
55  
56  
57  
58  
59  
60

- 1  
2  
3  
4 167. Tang O, Bigelow BF, Sheikh F, Peters M, Zenilman JM, Bennett R, et al. Outcomes of Nursing  
5 Home COVID-19 Patients by Initial Symptoms and Comorbidity: Results of Universal Testing of 1970  
6 Residents. *Journal of the American Medical Directors Association*. 2020;21(12):1767-73. e1.  
7  
8 168. Thiel Sarah L, Weber Myriam C, Karajan Tomas V, Sandra C, Matthias P, Nadia W, et al.  
9 Flattening the curve in 52 days: Characterisation of the COVID-19 pandemic in the Principality of  
10 Liechtenstein - an observational study. *Swiss Medical Weekly*. 2020;150(41-42):w20361.  
11  
12 169. Tian S, Zou X, Tian H, Xiao T, Xing J, Wu T, et al. Clinical Characteristics and Reasons for  
13 Differences in Duration From Symptom Onset to Release From Quarantine Among Patients With  
14 COVID-19 in Liaocheng, China. *Frontiers in Medicine*. 2020;7:210.  
15  
16 170. Tian S, Hu N, Lou J, Chen K, Kang X, Xiang Z, et al. Characteristics of COVID-19 infection in  
17 Beijing. *Journal of infection*. 2020;80(4):401-6.  
18  
19 171. Judson TJ, Odisho AY, Neinstein AB, Chao J, Williams A, Miller C, et al. Rapid design and  
20 implementation of an integrated patient self-triage and self-scheduling tool for COVID-19. *Journal of*  
21 *the American Medical Informatics Association*. 2020;27(6):860-6.  
22  
23 172. Tolia VM, Chan TC, Castillo EM. Preliminary results of initial testing for coronavirus  
24 (COVID-19) in the emergency department. *Western Journal of Emergency Medicine*. 2020;21(3):503.  
25  
26 173. He T, Yuanyuan X, Bo Y, Zewan Z, Song L. Value of HRCT in diagnosis of COVID-19.  
27 *INTERNATIONAL JOURNAL OF MEDICAL RADIOLOGY*. 2020;43(2):135.  
28  
29 174. Tong Z-D, Tang A, Li K-F, Li P, Wang H-L, Yi J-P, et al. Potential presymptomatic transmission  
30 of SARS-CoV-2, Zhejiang province, China, 2020. *Emerging infectious diseases*. 2020;26(5):1052.  
31  
32 175. Treibel TA, Manisty C, Augusto JB, Moon JC, Burton M, Lambourne J, et al. COVID-19: PCR  
33 screening of asymptomatic health-care workers at London hospital. *The Lancet*.  
34 2020;395(10237):1608-10.  
35  
36 176. Tsou T-P, Chen W-C, Huang AS-E, Chang S-C, Taiwan C-OIT. Epidemiology of the first 100  
37 cases of COVID-19 in Taiwan and its implications on outbreak control. *Journal of the Formosan*  
38 *Medical Association = Taiwan yi zhi*. 2020;119(11):1601-7.  
39  
40 177. London V, McLaren R, Atallah F, Cepeda C, McCalla S, Fisher N, et al. The Relationship between  
41 Status at Presentation and Outcomes among Pregnant Women with COVID-19. *American journal of*  
42 *perinatology*. 2020;37(10):991-4.  
43  
44 178. Wan R, Mao Z-Q, He L-Y, Hu Y-C. Evidence from two cases of asymptomatic infection with  
45 SARS-CoV-2: Are 14 days of isolation sufficient? *International journal of infectious diseases*.  
46 2020;95:174-5.  
47  
48 179. AH W, Long Q. Initial symptoms and epidemiological characteristics of confirmed cases of  
49 COVID-19 in the west of Chongqing. *Chinese Journal of Infect Control*. 2020;19 (3):234-8.  
50  
51 180. Deng W, Guang T-w, Yang M, Li J-r, Jiang D-p, Li C-y, et al. Positive results for patients with  
52 COVID-19 discharged form hospital in Chongqing, China. *BMC infectious diseases*. 2020;20(1):1-6.  
53  
54 181. Wang J, Liu J, Wang Y, Liu W, Chen X, Sun C, et al. Dynamic changes of chest CT imaging in  
55 patients with COVID-19. *Journal of Zhejiang University (Medical Sciences)*. 2020;49(2):191-7.  
56  
57 182. Zhou JH, Wu B, Wang WX, Lei F, Cheng X, Qin JJ, et al. No significant association between  
58 dipeptidyl peptidase-4 inhibitors and adverse outcomes of COVID-19. *World journal of clinical cases*.  
59 2020;8(22):5576-88.  
60  
61 183. Wang L, Cao H. Investigation and analysis of the characteristics of a family cluster of coronavirus  
62 disease 2019 in Zibo. *Journal Of Shandong University*. 2020;58 (10):100-4.  
63  
64 184. Wang L, Duan Y, Zhang W, Liang J, Xu J, Zhang Y, et al. Epidemiologic and clinical

1  
2  
3 characteristics of 26 cases of COVID-19 arising from patient-to-patient transmission in Liaocheng,  
4 China. *Clinical epidemiology*. 2020;12:387.

5  
6 185. Wang S, Liu X. Nucleic acid screening results of 738 close contacts of coronavirus disease 2019.  
7 *Chinese Journal of Infection Control* 2020. 2020;19 (4):297-300.

8  
9 186. Wang T, Shi L, Chen Y. Clinical Efficacy Analysis of 50 Cases of Corona Virus Disease 2019 in  
10 Traditional Chinese Medicine. *Jilin Journal of Chinese Medicine*. 2020;40 (3):281-5.

11  
12 187. Wang X, Fang J, Zhu Y, Chen L, Ding F, Zhou R, et al. Clinical characteristics of non-critically ill  
13 patients with novel coronavirus infection (COVID-19) in a Fangcang Hospital. *Clinical Microbiology  
14 and Infection*. 2020;26(8):1063-8.

15  
16 188. Gao W, Chen S, Wang K, Chen R, Guo Q, Lu J, et al. Clinical features and efficacy of antiviral  
17 drug, Arbidol in 220 nonemergency COVID-19 patients from East-West-Lake Shelter Hospital in  
18 Wuhan: a retrospective case series. *Virology journal*. 2020;17(1):162.

19  
20 189. Wang Z, Xiong G, Wang Z. Clinical characteristics and laboratory results of pregnant women with  
21 COVID-19 in Wuhan, China. *International Journal of Gynecology and Obstetrics*. 2020;150(3):312-7.

22  
23 190. Waya JLL, Mize V, Ambani B, Wamala JF, Guyo AG, Gray JH, et al. The first sixty days of  
24 COVID-19 in a humanitarian response setting: A descriptive epidemiological analysis of the outbreak  
25 in south Sudan. *Pan African Medical Journal*. 2020;37:384.

26  
27 191. Wong HYF, Lam HYS, Fong AH-T, Leung ST, Chin TW-Y, Lo CSY, et al. Frequency and  
28 distribution of chest radiographic findings in patients positive for COVID-19. *Radiology*.  
29 2020;296(2):E72-E8.

30  
31 192. Wong J, Alikhan MF, Chaw L, Naing L, Koh WC, Jamaludin SA, et al. Epidemiological  
32 investigation of the first 135 COVID-19 cases in Brunei: Implications for surveillance, control, and  
33 travel restrictions. *American Journal of Tropical Medicine and Hygiene*. 2020;103(4):1608-13.

34  
35 193. Wu G, Liu S, YX C. Epidemiological and clinical analysis of 104 patients with new coronavirus  
36 pneumonia. *Chinese Journal of Critical Care Medicine*. 2020;13 (2) (13 (2)):124-7.

37  
38 194. Wu H, Li B, Chen X. Clinical analysis of 23 cases of COVID-19 in children under 18 in Jiangxi.  
39 *Chinese Journal of Contemporary Pediatrics*. 2020;22 (5):419-24.

40  
41 195. Wu J, Song X, Gong X. Clinical analysis of 55 patients with COVID-19. *Jiangsu Medical Journal*.  
42 2020;46 (6):546-50.

43  
44 196. Xiaoqing W, Yuanliang X, Shutong Z, Jianpu C, Xiang W. Clinical characteristics, CT findings  
45 and AI application in pregnant women with COVID-19 pneumonia. *International Journal of Medical  
46 Radiology*. 2020;43(3):262.

47  
48 197. Wu Y, Huang S, Liu C. Analysis of laboratory test results of 23 cases of novel coronavirus  
49 pneumonia in Nantong area. *Medical Journal of Communications*. 2020;34 (2):115-6.

50  
51 198. Wu Y, Wei F, Li Q. The Epidemiological Characteristics of an Outbreak of 2019 Novel  
52 Coronavirus Diseases( COVID – 19) in Chegnde City. *Hebei Medicine*. 2020;26 (6):887-92.

53  
54 199. Xiang T, Liu J, Xu F, Cheng N, Liu Y, Qian K, et al. Analysis of clinical characteristics of 49  
55 patients with coronavirus disease 2019 in Jiangxi. *Chinese Journal of Respiratory and Critical Care  
56 Medicine*. 2020;19(2):154-60.

57  
58 200. Xie J, Jiang H. Analysis of the clustered epidemic situation of new coronavirus pneumonia units  
59 in 2019. 2020.

60  
201. Xie Y, Chen Q, Chen W. Discussion on CT Diagnosis of 39 Cases of Novel Coronavirus  
Pneumonia. *Zhejiang Journal of Integrated Traditional Chinese and Western Medicine*. 2020;30  
(6):437-9.

- 1  
2  
3  
4 202. Xu H, Liu E, Xie J, Smyth RL, Zhou Q, Zhao R, et al. A follow-up study of children infected with  
5 SARS-CoV-2 from Western China. *Annals of translational medicine*. 2020;8(10).
- 6 203. Xu S, Sun P, Shao F, Cui H, Yu C, Tang Z, et al. Clinical manifestation and neonatal outcomes of  
7 pregnant patients with coronavirus disease 2019 pneumonia in Wuhan, China. *Open Forum Infectious*  
8 *Diseases*. 2020;7(7):ofaa283.
- 9  
10 204. Xu T, Chen C, Zhu Z, Cui M, Chen C, Dai H, et al. Clinical features and dynamics of viral load in  
11 imported and non-imported patients with COVID-19. *International Journal of Infectious Diseases*.  
12 2020;94:68-71.
- 13  
14 205. Yan X, Han X, Peng D, Fan Y, Fang Z, Long D, et al. Clinical Characteristics and Prognosis of  
15 218 Patients With COVID-19: A Retrospective Study Based on Clinical Classification. *Frontiers in*  
16 *medicine*. 2020;7:485.
- 17  
18 206. Yang K, Xiao Y, Liu Y. Epidemiological and clinical characteristics of coronavirus disease 2019 in  
19 non-epidemic areas: report of 57 cases. *Acta Academiae Medicinae Militaris Tertiae*. 2020;42 (6):555-9.
- 20  
21 207. Yang N, Shen Y, Shi C, Ma AHY, Zhang X, Jian X, et al. In-flight transmission cluster of  
22 COVID-19: a retrospective case series. *Infectious diseases*. 2020;52(12):891-901.
- 23  
24 208. Yang R, Gui X, Xiong Y. Comparison of clinical characteristics of patients with asymptomatic vs  
25 symptomatic coronavirus disease 2019 in Wuhan, China. *JAMA network open*. 2020;3(5):e2010182-e.
- 26  
27 209. Yang Y, Li L, Li C. A survey on clustering of novel coronavirus disease in families in Fengjie  
28 county of Chongqing municipality. *Chinese Journal of Public Health*. 2020;36 (3):285-8.
- 29  
30 210. Yang Y, Ren C, Wang Y. Clinical Features of 88 Cases with Novel Coronavirus Pneumonia.  
31 *Journal of Kunming University*. 2020;42 (2):81-3.
- 32  
33 211. Yao Q, Zhang C, Fu J. HRCT feature and evolution rule of COVID - 19. *The Journal of Practical*  
34 *Medicine*. 2020;36 (12):1552-7.
- 35  
36 212. Yao X, Zhao X. Familial clustering infection caused by asymptomatic COVID-19. *International*  
37 *Journal of Respiration*. 2020;40 (13):982-7.
- 38  
39 213. Yayla BCC, Aykac K, Ozsurekci Y, Ceyhan M. Characteristics and Management of Children With  
40 COVID-19 in a Tertiary Care Hospital in Turkey. *Clinical Pediatrics*. 2021;60(3):170-7.
- 41  
42 214. Ye X, Xie Y, Chen Q. 3 CT diagnosis of clustered new coronavirus pneumonia. *Zhejiang Medical*  
43 *Journal*. 2020;42 (4):395-7.
- 44  
45 215. Ye Y, Fan W, Wang W. Difference in epidemic characteristics between asymptomatic infected  
46 persons and confirmed cases in COVID-19 clustered epidemics. *Chinese Journal of Infection Control*.  
47 2020;19 (6):492-7.
- 48  
49 216. Yu F, Yan L, Wang N, Yang S, Wang L, Tang Y, et al. Quantitative detection and viral load  
50 analysis of SARS-CoV-2 in infected patients. *Clinical Infectious Diseases*. 2020;71(15):793-8.
- 51  
52 217. JX Y. Epidemiological and clinical characteristics analysis of 87 patients with novel coronavirus  
53 pneumonia in Hangzhou. *Zhejiang Clinical Medical Journal*. 2020:318-24.
- 54  
55 218. Yu X, Yu Y, WH Y. Analysis of the nucleic acid detection results of 2019 Novel Coronavirus in  
56 108 inpatients. *Chinese Journal of New Clinical Medicine*. 2020;13 (5):448-52.
- 57  
58 219. Yuan L, Zhang J. Clinical characteristics and prognostic analysis of COVID-19 infection in 28  
59 pregnant women. *Journal of Xinjiang Medical University*. 2020;43 (4):449-57.
- 60  
220. Yue H, Bai X, Yu Q, Liu W, Pu J, Wang X, et al. Clinical characteristics of coronavirus disease  
2019 in Gansu province, China. *Annals of palliative medicine*. 2020;9(4):1404-12.
221. Zeng J, Qiu L, Zou Y, Zhang G, Wu X, Xu X, et al. Epidemiological outcome of close contacts of  
coronavirus disease 2019 cases in Sichuan province. *Chinese Journal of Public Health*.

- 2020;36(4):503-6.
222. Zeng W, Liu B, Jin Y. Clinical characteristics of 44 patients with coronavirus disease 2019 in Yongzhou. *Journal of Hainan Medical University*. 2020;26 (13):967-71.
223. Yang W, Teng X. Clinical analysis of 11 children with COVID-19. *Journal of Bengbu Medical College*. 2020;45 (6):708-11.
224. Zhan H, SX B. Diagnosis and Treatment of Novel Coronavirus Pneumonia in Children. *Journal of Hubei University of Medicine*. 2020;39 (3).
225. Zhan T, Liu M, Han Z, Chen X, Tian X, Huang X, et al. Retrospective analysis of clinical characteristics of 405 patients with COVID-19. *Journal of International Medical Research*. 2020;48(8).
226. Zhang J, Tian S, Lou J, Chen Y. Familial cluster of COVID-19 infection from an asymptomatic. *Critical care*. 2020;24(1):1-3.
227. Zhang K, Zhang L, Li M. Clinical features comparative analysis on familial aggregation cases of imported and local coronavirus disease 2019. *Chinese Journal of Integrated Traditional and Western Medicine in Intensive and Critical Care*. 2020;27 (4):385-9.
228. Zhang L, Huang S. Clinical Features of 33 Cases in Children Infected With SARS-CoV-2 in Anhui Province, China—A Multi-Center Retrospective Cohort Study. *Frontiers in Public Health*. 2020;8:255.
229. Zhang R, Li Y, Yu L, Ma X, Tong S, Yan J, et al. Infection risk and its influencing factors among close contacts of patients with novel coronavirus diseases 2019 in Liaoning province. *Chinese Journal of Public Health*. 2020;36:477-80.
230. Zhang Y, Xing L-H, Ni Z-Y, Yin X-P, Gao B-L, Xie R-M, et al. Clinical and imaging features of pediatric COVID-19. *Italian Journal of Pediatrics*. 2020;46(1):153.
231. Yongchen Z, Shen H, Wang X, Shi X, Li Y, Yan J, et al. Different longitudinal patterns of nucleic acid and serology testing results based on disease severity of COVID-19 patients. *Emerging microbes & infections*. 2020;9(1):833-6.
232. Zhang Y. Epidemiological Characteristics and Characteristics of Infection of 18 Confirmed Cases of Corona Virus Disease 2019 in Qinghai Province, China. *Chinese Journal of Nosocomiology*. 2020;30 (10):1475-9.
233. Zhao L, Xue J, Wang Y. Comparative study of imported and local clinical features of COVID-19 patients in Shijiazhuang. *Shandong Medical Journal*. 2020;60 (15):10-3.
234. Zhang Z, Bin Y. Coronavirus disease 2019: clinical characteristics and therapeutic effect analysis of 193 cases. *Chinese Journal OF Difficut and Complicated Cases*. 2020;19 (6):559-62.
235. Zhou H, Yuan J, Yang G. Preliminary Study on Treatment and Diagnosis of Integrated Traditional Chinese and Western Medicine of 13 Patients with NCP in Qujing Area. *Chinese Journal of Ethnomedicine and Ethnopharmacy*. 2020;29 (5):55-8.
236. Zhou L, Hunag H. Epidemiological characteristics of clustering outbreaks of 51 cases of COVID-19 in Xinyang, He'nan. *China Tropical Medicine*. 2020;20 (11):1078-81.
237. Zhou R, Li F, Chen F, Liu H, Zheng J, Lei C, et al. Viral dynamics in asymptomatic patients with COVID-19. *International Journal of Infectious Diseases*. 2020;96:288-90.
238. Zhu J, Zhang Q, Jia C, Wang W, Chen J, Xia Y, et al. Epidemiological Characteristics and Clinical Outcomes of Coronavirus Disease Patients in Northwest China: High-Volume Research From Low Population Density Regions. *Frontiers in medicine*. 2020;7:775.
239. Zhu M, Zeng Y. Clinical characteristics of 77 COVID-19 cases imported from abroad. *Fudan University Journal of Medicine Science*. 2020;47 (6):888-91.

1  
2  
3  
4  
5  
6  
7  
8  
9  
10  
11  
12  
13  
14  
15  
16  
17  
18  
19  
20  
21  
22  
23  
24  
25  
26  
27  
28  
29  
30  
31  
32  
33  
34  
35  
36  
37  
38  
39  
40  
41  
42  
43  
44  
45  
46  
47  
48  
49  
50  
51  
52  
53  
54  
55  
56  
57  
58  
59  
60

240. Zhu S, Fan Z. Epidemiological features of COVID-19 in Shenzhen city based on network resources. Chinese Journal of Hygiene Rescue. 2020;6 (3):148-54.

For peer review only

**Supplementary Table 3 Quality assessment of selected articles**

|                              | Introduction |   |   | Methods |   |   |   |   |   |    | Results |    |    |    | Discussion |    | Other |    |    |    |
|------------------------------|--------------|---|---|---------|---|---|---|---|---|----|---------|----|----|----|------------|----|-------|----|----|----|
|                              | 1            | 2 | 3 | 4       | 5 | 6 | 7 | 8 | 9 | 10 | 11      | 12 | 13 | 14 | 15         | 16 | 17    | 18 | 19 | 20 |
| Abey Suriya Sanduni          | Y            | Y | N | Y       | Y | Y | Y | Y | Y | Y  | Y       | Y  | Y  | Y  | NM         | Y  | Y     | Y  | N  | N  |
| Adedeji Idris Abiodun        | Y            | Y | N | Y       | Y | Y | Y | Y | Y | Y  | Y       | Y  | Y  | Y  | NM         | Y  | Y     | Y  | N  | Y  |
| Adetola Hammed Hassan        | Y            | Y | N | Y       | Y | Y | Y | Y | Y | N  | Y       | Y  | Y  | Y  | NM         | Y  | Y     | Y  | N  | NM |
| Aherfi Sarah                 | Y            | Y | N | Y       | Y | Y | Y | Y | Y | Y  | Y       | Y  | Y  | Y  | NM         | Y  | Y     | Y  | N  | Y  |
| Almazeedi Sulaiman           | Y            | Y | N | Y       | Y | Y | Y | Y | Y | Y  | Y       | Y  | Y  | Y  | NM         | Y  | Y     | Y  | N  | Y  |
| Alshahrani Mohammed S        | Y            | Y | N | Y       | Y | Y | Y | Y | Y | Y  | Y       | Y  | Y  | Y  | NM         | Y  | Y     | Y  | N  | Y  |
| Alshukry Abdullah            | Y            | Y | N | Y       | Y | Y | Y | Y | Y | Y  | Y       | Y  | Y  | Y  | NM         | Y  | Y     | Y  | N  | NM |
| Alsofayan Yousef M           | Y            | Y | N | Y       | Y | Y | Y | Y | Y | Y  | Y       | Y  | Y  | Y  | NM         | Y  | Y     | Y  | N  | NM |
| Alvin J Ing                  | Y            | Y | N | Y       | Y | Y | Y | Y | Y | N  | Y       | Y  | Y  | Y  | NM         | Y  | Y     | N  | NM | NM |
| Amy V. Dora                  | Y            | Y | N | Y       | Y | Y | Y | Y | Y | N  | Y       | Y  | Y  | Y  | NM         | Y  | Y     | Y  | N  | NM |
| An YH                        | Y            | Y | N | Y       | Y | Y | Y | Y | Y | Y  | Y       | Y  | Y  | Y  | Y          | Y  | Y     | N  | NM | NM |
| Andrea Lombardi              | Y            | Y | N | Y       | Y | Y | Y | Y | Y | Y  | Y       | Y  | Y  | Y  | Y          | Y  | Y     | Y  | N  | Y  |
| Antonio-Villa Nefali Eduardo | Y            | Y | N | Y       | Y | Y | Y | Y | Y | Y  | Y       | Y  | Y  | Y  | NM         | Y  | Y     | Y  | N  | NM |
| Arima                        | Y            | Y | N | Y       | Y | Y | Y | Y | Y | N  | Y       | Y  | Y  | Y  | NM         | Y  | Y     | Y  | NM | Y  |
| Ashinyo Mary Eyram           | Y            | Y | N | Y       | Y | Y | Y | Y | Y | Y  | Y       | Y  | Y  | Y  | Y          | Y  | Y     | N  | N  | Y  |
| Atakla Hugues Ghislain       | Y            | Y | N | Y       | Y | Y | Y | Y | Y | N  | Y       | Y  | Y  | Y  | NM         | Y  | Y     | Y  | N  | N  |
| Backer JA                    | Y            | Y | N | Y       | Y | Y | Y | Y | Y | Y  | Y       | Y  | Y  | Y  | NM         | Y  | Y     | N  | N  | NM |
| Bai M                        | Y            | Y | N | Y       | Y | Y | Y | Y | Y | Y  | Y       | Y  | Y  | Y  | Y          | Y  | Y     | N  | NM | NM |
| Bai R                        | Y            | Y | N | Y       | Y | Y | Y | Y | Y | N  | Y       | Y  | Y  | Y  | NM         | Y  | Y     | N  | N  | NM |
| Bai SL                       | Y            | Y | N | Y       | Y | Y | Y | Y | Y | N  | Y       | Y  | Y  | Y  | NM         | Y  | Y     | N  | N  | NM |
| BHAKTI SARANGI               | Y            | Y | N | Y       | Y | Y | Y | Y | Y | Y  | Y       | Y  | Y  | Y  | NM         | Y  | Y     | Y  | N  | Y  |



1  
2  
3  
4  
5  
6  
7  
8  
9  
10  
11  
12  
13  
14  
15  
16  
17  
18  
19  
20  
21  
22  
23  
24  
25  
26  
27  
28  
29  
30  
31  
32  
33  
34  
35  
36  
37  
38  
39  
40  
41  
42  
43  
44  
45  
46

|                                                      |    |   |   |   |   |   |   |   |    |   |   |   |   |   |    |   |   |   |    |    |
|------------------------------------------------------|----|---|---|---|---|---|---|---|----|---|---|---|---|---|----|---|---|---|----|----|
| Bianco Angela                                        | Y  | Y | N | Y | Y | Y | Y | Y | Y  | Y | Y | Y | Y | Y | NM | Y | Y | Y | N  | NM |
| Bin YF                                               | Y  | Y | N | Y | Y | Y | Y | Y | NM | Y | Y | Y | Y | Y | NM | Y | Y | N | NM | NM |
| Blain Hubert                                         | Y  | Y | N | Y | Y | Y | Y | Y | Y  | Y | Y | Y | Y | Y | Y  | Y | Y | N | N  | N  |
| Böhmer MM                                            | Y  | Y | N | Y | Y | Y | Y | Y | NM | Y | Y | Y | Y | Y | Y  | Y | Y | Y | NM | NM |
| Breslin Noelle                                       | Y  | Y | N | Y | Y | Y | Y | Y | Y  | N | Y | Y | Y | Y | NM | Y | Y | Y | N  | NM |
| Bruminhent Jackrapong                                | Y  | Y | N | Y | Y | Y | Y | Y | Y  | Y | Y | Y | N | Y | NM | Y | Y | Y | N  | Y  |
| Cai Jiehao                                           | Y  | Y | N | Y | Y | Y | Y | Y | Y  | Y | Y | Y | Y | Y | Y  | Y | Y | Y | N  | Y  |
| Cao JM                                               | Y  | Y | N | Y | Y | Y | Y | Y | Y  | N | Y | Y | Y | Y | Y  | Y | Y | N | NM | NM |
| Carla Felice                                         | Y  | Y | N | Y | Y | Y | Y | Y | NM | Y | Y | Y | Y | Y | NM | Y | Y | Y | N  | Y  |
| Chan JFW                                             | Y  | Y | N | Y | Y | Y | Y | Y | NM | Y | Y | Y | Y | Y | NM | Y | Y | Y | N  | NM |
| Chen B                                               | Y  | Y | N | Y | Y | Y | Y | Y | Y  | N | Y | Y | Y | Y | Y  | Y | Y | N | NM | NM |
| Chen J                                               | Y  | Y | N | Y | Y | Y | Y | Y | Y  | Y | Y | Y | Y | Y | Y  | Y | Y | Y | N  | Y  |
| Chen T                                               | Y  | Y | N | Y | Y | Y | Y | Y | Y  | N | Y | Y | Y | Y | NM | Y | Y | N | NM | NM |
| Chen Y                                               | Y  | Y | N | Y | Y | Y | Y | Y | NM | Y | Y | Y | Y | Y | NM | Y | Y | N | N  | Y  |
| Chen YJ                                              | Y  | Y | N | Y | Y | Y | Y | Y | Y  | Y | Y | Y | Y | Y | NM | Y | Y | Y | NM | NM |
| Cheng ZP                                             | Y  | Y | N | Y | Y | Y | Y | Y | Y  | Y | N | Y | Y | Y | NM | Y | Y | Y | N  | Y  |
| Choe PG                                              | Y  | Y | N | Y | Y | Y | Y | Y | Y  | Y | Y | Y | Y | Y | Y  | Y | Y | N | N  | Y  |
| COVID-19 National Incident Room<br>Surveillance Team | NM | Y | N | Y | Y | Y | Y | Y | NM | N | Y | Y | Y | Y | NM | Y | N | N | NM | NM |
| Dai Y                                                | Y  | Y | N | Y | Y | Y | Y | Y | Y  | N | Y | Y | Y | Y | Y  | Y | Y | N | NM | NM |
| Daniela Loconsole                                    | Y  | Y | N | Y | Y | Y | Y | Y | Y  | N | Y | Y | Y | Y | NM | Y | Y | Y | N  | NM |
| Ding Y                                               | Y  | Y | N | Y | Y | Y | Y | Y | Y  | N | Y | Y | Y | Y | NM | Y | Y | N | NM | NM |
| Dong X                                               | Y  | Y | N | Y | Y | Y | Y | Y | Y  | N | Y | Y | Y | Y | NM | Y | Y | N | NM | NM |
| Dong XC                                              | Y  | Y | N | Y | Y | Y | Y | Y | Y  | Y | Y | Y | Y | Y | NM | Y | Y | N | N  | NM |
| Dong YY                                              | Y  | Y | N | Y | Y | Y | Y | Y | Y  | Y | Y | Y | Y | Y | Y  | Y | Y | Y | NM | NM |

|    |                        |   |   |   |   |   |   |   |   |   |   |   |   |   |    |   |   |   |    |    |
|----|------------------------|---|---|---|---|---|---|---|---|---|---|---|---|---|----|---|---|---|----|----|
| 1  |                        |   |   |   |   |   |   |   |   |   |   |   |   |   |    |   |   |   |    |    |
| 2  |                        |   |   |   |   |   |   |   |   |   |   |   |   |   |    |   |   |   |    |    |
| 3  |                        |   |   |   |   |   |   |   |   |   |   |   |   |   |    |   |   |   |    |    |
| 4  |                        |   |   |   |   |   |   |   |   |   |   |   |   |   |    |   |   |   |    |    |
| 5  | Erinoso Olufemi A.     | Y | Y | N | Y | Y | Y | Y | Y | Y | Y | Y | Y | Y | NM | Y | Y | Y | N  | Y  |
| 6  | Eythorsson Elias       | Y | Y | N | Y | Y | Y | Y | Y | N | Y | Y | Y | Y | NM | Y | Y | Y | N  | Y  |
| 7  | Fakiri EL K            | Y | Y | N | Y | Y | Y | Y | Y | N | Y | Y | Y | Y | Y  | Y | Y | N | N  | Y  |
| 8  | Fan YZ                 | Y | Y | N | Y | Y | Y | Y | Y | N | Y | Y | Y | Y | NM | Y | Y | N | NM | NM |
| 9  | Feaster Matt           | Y | Y | N | Y | Y | Y | Y | Y | N | Y | Y | Y | Y | NM | Y | Y | Y | NM | NM |
| 10 | Feng XP                | Y | Y | N | Y | Y | Y | Y | Y | Y | Y | Y | Y | Y | NM | Y | Y | Y | NM | Y  |
| 11 | Foster Catherine E.    | Y | Y | N | Y | Y | Y | Y | Y | N | Y | Y | Y | Y | NM | Y | Y | Y | N  | NM |
| 12 | Friederike Maechler    | Y | Y | N | Y | Y | Y | Y | Y | Y | Y | Y | Y | Y | NM | Y | Y | Y | N  | Y  |
| 13 | Gao HJ                 | Y | Y | N | Y | Y | Y | Y | Y | Y | Y | Y | Y | Y | Y  | Y | Y | N | N  | NM |
| 14 | Gao T                  | Y | Y | N | Y | Y | Y | Y | Y | Y | Y | Y | Y | Y | NM | Y | Y | N | NM | NM |
| 15 | Gautret P              | Y | Y | N | Y | Y | Y | Y | Y | Y | Y | Y | Y | Y | Y  | Y | Y | Y | N  | Y  |
| 16 | Gill Livingston        | Y | Y | N | Y | Y | Y | Y | Y | Y | Y | Y | Y | Y | NM | Y | Y | Y | N  | Y  |
| 17 | Grados Isabel Zumalave | Y | Y | N | Y | Y | Y | Y | Y | N | Y | Y | Y | Y | NM | Y | Y | N | N  | NM |
| 18 | Graham N.S.N.          | Y | Y | N | Y | Y | Y | Y | Y | Y | Y | Y | Y | Y | Y  | Y | Y | Y | N  | Y  |
| 19 | Grechukhina Olga       | Y | Y | N | Y | Y | Y | Y | Y | Y | Y | Y | Y | Y | Y  | Y | Y | Y | N  | NM |
| 20 | Gu. Kim                | Y | Y | N | Y | Y | Y | Y | Y | N | Y | Y | Y | Y | NM | Y | Y | Y | N  | NM |
| 21 | Guo CX                 | Y | Y | N | Y | Y | Y | Y | Y | N | Y | Y | Y | Y | NM | Y | Y | Y | N  | Y  |
| 22 | Han RD                 | Y | Y | N | Y | Y | Y | Y | Y | N | Y | Y | Y | Y | NM | Y | Y | Y | NM | NM |
| 23 | He M                   | Y | Y | N | Y | Y | Y | Y | Y | N | Y | Y | Y | Y | NM | Y | Y | Y | N  | Y  |
| 24 | He WB                  | Y | Y | N | Y | Y | Y | Y | Y | N | Y | Y | Y | Y | NM | Y | Y | N | NM | NM |
| 25 | Hu SX                  | Y | Y | N | Y | Y | Y | Y | Y | Y | Y | Y | Y | Y | NM | Y | Y | Y | NM | NM |
| 26 | Huang DD               | Y | Y | N | Y | Y | Y | Y | Y | Y | Y | Y | Y | Y | NM | Y | Y | N | NM | NM |
| 27 | IH Huerta Saenz        | Y | Y | N | Y | Y | Y | Y | Y | Y | Y | Y | Y | Y | NM | Y | Y | N | N  | NM |
| 28 | Ipekci A               | Y | Y | N | Y | Y | Y | Y | Y | N | Y | Y | Y | Y | NM | Y | Y | Y | N  | Y  |
| 29 | Irene Petersen         | Y | Y | N | Y | Y | Y | Y | Y | Y | Y | Y | Y | Y | NM | Y | Y | N | N  | Y  |
| 30 |                        |   |   |   |   |   |   |   |   |   |   |   |   |   |    |   |   |   |    |    |
| 31 |                        |   |   |   |   |   |   |   |   |   |   |   |   |   |    |   |   |   |    |    |
| 32 |                        |   |   |   |   |   |   |   |   |   |   |   |   |   |    |   |   |   |    |    |
| 33 |                        |   |   |   |   |   |   |   |   |   |   |   |   |   |    |   |   |   |    |    |
| 34 |                        |   |   |   |   |   |   |   |   |   |   |   |   |   |    |   |   |   |    |    |
| 35 |                        |   |   |   |   |   |   |   |   |   |   |   |   |   |    |   |   |   |    |    |
| 36 |                        |   |   |   |   |   |   |   |   |   |   |   |   |   |    |   |   |   |    |    |
| 37 |                        |   |   |   |   |   |   |   |   |   |   |   |   |   |    |   |   |   |    |    |
| 38 |                        |   |   |   |   |   |   |   |   |   |   |   |   |   |    |   |   |   |    |    |
| 39 |                        |   |   |   |   |   |   |   |   |   |   |   |   |   |    |   |   |   |    |    |
| 40 |                        |   |   |   |   |   |   |   |   |   |   |   |   |   |    |   |   |   |    |    |
| 41 |                        |   |   |   |   |   |   |   |   |   |   |   |   |   |    |   |   |   |    |    |
| 42 |                        |   |   |   |   |   |   |   |   |   |   |   |   |   |    |   |   |   |    |    |
| 43 |                        |   |   |   |   |   |   |   |   |   |   |   |   |   |    |   |   |   |    |    |
| 44 |                        |   |   |   |   |   |   |   |   |   |   |   |   |   |    |   |   |   |    |    |
| 45 |                        |   |   |   |   |   |   |   |   |   |   |   |   |   |    |   |   |   |    |    |
| 46 |                        |   |   |   |   |   |   |   |   |   |   |   |   |   |    |   |   |   |    |    |

1  
2  
3  
4  
5  
6  
7  
8  
9  
10  
11  
12  
13  
14  
15  
16  
17  
18  
19  
20  
21  
22  
23  
24  
25  
26  
27  
28  
29  
30  
31  
32  
33  
34  
35  
36  
37  
38  
39  
40  
41  
42  
43  
44  
45  
46

|                    |   |   |   |   |   |   |   |   |    |   |   |   |   |   |    |   |   |   |    |    |
|--------------------|---|---|---|---|---|---|---|---|----|---|---|---|---|---|----|---|---|---|----|----|
| Jennifer S. Singer | Y | Y | N | Y | Y | Y | Y | Y | Y  | N | Y | Y | Y | Y | NM | Y | Y | Y | N  | NM |
| Jeong SJ           | Y | Y | N | Y | Y | Y | Y | Y | Y  | Y | Y | Y | Y | Y | Y  | Y | Y | Y | N  | NM |
| Jha S              | Y | Y | N | Y | Y | Y | Y | Y | NM | N | Y | Y | Y | Y | NM | Y | Y | Y | NM | NM |
| Ji GH              | Y | Y | N | Y | Y | Y | Y | Y | Y  | N | Y | Y | Y | Y | NM | Y | Y | N | NM | NM |
| Ji T               | Y | Y | N | Y | Y | Y | Y | Y | Y  | N | Y | Y | Y | Y | NM | Y | Y | Y | N  | Y  |
| Jia CY             | Y | Y | N | Y | Y | Y | Y | Y | Y  | Y | Y | Y | Y | Y | NM | Y | Y | N | NM | NM |
| Jiang CH           | Y | Y | N | Y | Y | Y | Y | Y | Y  | Y | Y | Y | Y | Y | NM | Y | Y | Y | N  | Y  |
| Jiang R            | Y | Y | N | Y | Y | Y | Y | Y | Y  | N | Y | Y | Y | Y | Y  | Y | Y | N | NM | NM |
| Jibrin YB          | Y | Y | N | Y | Y | Y | Y | Y | Y  | N | Y | Y | Y | Y | NM | Y | Y | Y | N  | Y  |
| Jin MH             | Y | Y | N | Y | Y | Y | Y | Y | Y  | N | Y | Y | Y | Y | NM | Y | Y | N | NM | NM |
| Jung CY            | Y | Y | N | Y | Y | Y | Y | Y | Y  | N | Y | Y | Y | Y | NM | Y | Y | N | N  | NM |
| Kang M             | Y | Y | N | Y | Y | Y | Y | Y | Y  | Y | Y | Y | Y | Y | Y  | Y | Y | N | NM | Y  |
| Kasper MR          | Y | Y | N | Y | Y | Y | Y | Y | Y  | Y | Y | Y | Y | Y | NM | Y | Y | N | NM | NM |
| Ke B               | Y | Y | N | Y | Y | Y | Y | Y | Y  | Y | Y | Y | Y | Y | NM | Y | Y | Y | N  | NM |
| Kenu E             | Y | Y | N | Y | Y | Y | Y | Y | Y  | N | Y | Y | Y | Y | NM | Y | Y | Y | N  | Y  |
| Ki M               | Y | Y | N | Y | Y | Y | Y | Y | NM | Y | Y | Y | Y | Y | NM | Y | Y | N | N  | Y  |
| Kirenga Bruce      | Y | Y | N | Y | Y | Y | Y | Y | Y  | Y | Y | Y | Y | Y | NM | Y | Y | Y | N  | Y  |
| Kong WF            | Y | Y | N | Y | Y | Y | Y | Y | Y  | Y | Y | Y | Y | Y | NM | Y | Y | Y | N  | Y  |
| Krajcar N          | Y | Y | N | Y | Y | Y | Y | Y | Y  | Y | Y | Y | Y | Y | NM | Y | Y | Y | N  | Y  |
| Kristin J. Meyers  | Y | Y | N | Y | Y | Y | Y | Y | Y  | Y | Y | Y | Y | Y | NM | Y | Y | Y | N  | Y  |
| Kumar R            | Y | Y | N | Y | Y | Y | Y | Y | Y  | Y | Y | Y | Y | Y | Y  | Y | Y | Y | N  | Y  |
| Ladhani Shamez N   | Y | Y | N | Y | Y | Y | Y | Y | Y  | Y | Y | Y | Y | Y | NM | Y | Y | Y | N  | Y  |
| Lai XQ             | Y | Y | N | Y | Y | Y | Y | Y | NM | Y | Y | Y | Y | Y | NM | Y | Y | Y | N  | Y  |
| Le TQM             | Y | Y | N | Y | Y | Y | Y | Y | Y  | N | Y | Y | Y | Y | NM | Y | Y | N | NM | NM |
| Lee YH             | Y | Y | N | Y | Y | Y | Y | Y | Y  | Y | Y | Y | Y | Y | NM | Y | Y | Y | NM | NM |

|    |             |   |   |   |   |   |   |   |   |   |   |   |   |   |    |   |   |   |    |    |
|----|-------------|---|---|---|---|---|---|---|---|---|---|---|---|---|----|---|---|---|----|----|
| 1  |             |   |   |   |   |   |   |   |   |   |   |   |   |   |    |   |   |   |    |    |
| 2  |             |   |   |   |   |   |   |   |   |   |   |   |   |   |    |   |   |   |    |    |
| 3  |             |   |   |   |   |   |   |   |   |   |   |   |   |   |    |   |   |   |    |    |
| 4  |             |   |   |   |   |   |   |   |   |   |   |   |   |   |    |   |   |   |    |    |
| 5  | Lei MY      | Y | Y | N | Y | Y | Y | Y | Y | N | Y | Y | Y | Y | NM | Y | Y | N | NM | NM |
| 6  | Lewis Megan | Y | Y | N | Y | Y | Y | Y | Y | Y | Y | Y | Y | Y | N  | Y | Y | Y | N  | NM |
| 7  |             |   |   |   |   |   |   |   |   |   |   |   |   |   |    |   |   |   |    |    |
| 8  | Li CY       | Y | Y | N | Y | Y | Y | Y | Y | N | Y | Y | Y | Y | NM | Y | N | N | NM | NM |
| 9  | Li JH       | Y | Y | N | Y | Y | Y | Y | Y | Y | Y | Y | Y | Y | Y  | Y | Y | Y | NM | Y  |
| 10 | Li W        | Y | Y | N | Y | Y | Y | Y | Y | N | Y | Y | Y | Y | NM | Y | Y | N | N  | Y  |
| 11 | Li Y        | Y | Y | N | Y | Y | Y | Y | Y | N | Y | Y | Y | Y | NM | Y | Y | N | NM | Y  |
| 12 |             |   |   |   |   |   |   |   |   |   |   |   |   |   |    |   |   |   |    |    |
| 13 | Li Y        | Y | Y | N | Y | Y | Y | Y | Y | Y | Y | Y | Y | Y | NM | Y | Y | Y | N  | Y  |
| 14 | Li YL       | Y | Y | N | Y | Y | Y | Y | Y | Y | Y | Y | Y | Y | NM | Y | Y | Y | N  | Y  |
| 15 |             |   |   |   |   |   |   |   |   |   |   |   |   |   |    |   |   |   |    |    |
| 16 | Liao XN     | Y | Y | N | Y | Y | Y | Y | Y | Y | Y | Y | Y | Y | NM | Y | Y | N | NM | NM |
| 17 | Lin S       | Y | Y | N | Y | Y | Y | Y | Y | Y | Y | Y | Y | Y | Y  | Y | Y | Y | N  | Y  |
| 18 |             |   |   |   |   |   |   |   |   |   |   |   |   |   |    |   |   |   |    |    |
| 19 | Lin XM      | Y | Y | N | Y | Y | Y | Y | Y | Y | Y | Y | Y | Y | NM | Y | Y | Y | NM | NM |
| 20 | Lin ZF      | Y | Y | N | Y | Y | Y | Y | Y | Y | Y | Y | Y | Y | NM | Y | Y | Y | NM | NM |
| 21 | Liu B       | Y | Y | N | Y | Y | Y | Y | Y | N | Y | Y | Y | Y | NM | Y | Y | N | NM | NM |
| 22 |             |   |   |   |   |   |   |   |   |   |   |   |   |   |    |   |   |   |    |    |
| 23 | Liu BM      | Y | Y | N | Y | Y | Y | Y | Y | Y | Y | Y | Y | Y | NM | Y | Y | N | N  | Y  |
| 24 | Liu BY      | Y | Y | N | Y | Y | Y | Y | Y | N | Y | Y | Y | Y | NM | Y | Y | N | NM | NM |
| 25 | Liu DH      | Y | Y | N | Y | Y | Y | Y | Y | N | Y | Y | Y | Y | NM | Y | Y | Y | NM | Y  |
| 26 |             |   |   |   |   |   |   |   |   |   |   |   |   |   |    |   |   |   |    |    |
| 27 | Liu F       | Y | Y | N | Y | Y | Y | Y | Y | Y | Y | Y | Y | Y | Y  | Y | Y | Y | N  | Y  |
| 28 | Liu F       | Y | Y | N | Y | Y | Y | Y | Y | N | Y | Y | Y | Y | NM | Y | Y | N | NM | Y  |
| 29 | Liu GT      | Y | Y | N | Y | Y | Y | Y | Y | Y | Y | Y | Y | Y | NM | Y | Y | Y | NM | Y  |
| 30 |             |   |   |   |   |   |   |   |   |   |   |   |   |   |    |   |   |   |    |    |
| 31 | Liu MQ      | Y | Y | N | Y | Y | Y | Y | Y | N | Y | Y | Y | Y | Y  | Y | N | N | N  | NM |
| 32 | Liu X       | Y | Y | N | Y | Y | Y | Y | Y | N | Y | Y | Y | Y | NM | Y | Y | N | NM | NM |
| 33 |             |   |   |   |   |   |   |   |   |   |   |   |   |   |    |   |   |   |    |    |
| 34 | Liu XX      | Y | Y | N | Y | Y | Y | Y | Y | Y | Y | Y | Y | Y | NM | Y | Y | N | NM | NM |
| 35 | Liu YL      | Y | Y | N | Y | Y | Y | Y | Y | N | Y | Y | Y | Y | NM | Y | Y | N | N  | NM |
| 36 | Liu YX      | Y | Y | N | Y | Y | Y | Y | Y | Y | Y | Y | Y | Y | Y  | Y | Y | N | N  | Y  |
| 37 |             |   |   |   |   |   |   |   |   |   |   |   |   |   |    |   |   |   |    |    |
| 38 | Liu ZR      | Y | Y | N | Y | Y | Y | Y | Y | N | Y | Y | Y | Y | NM | Y | Y | Y | N  | NM |
| 39 |             |   |   |   |   |   |   |   |   |   |   |   |   |   |    |   |   |   |    |    |
| 40 |             |   |   |   |   |   |   |   |   |   |   |   |   |   |    |   |   |   |    |    |
| 41 |             |   |   |   |   |   |   |   |   |   |   |   |   |   |    |   |   |   |    |    |
| 42 |             |   |   |   |   |   |   |   |   |   |   |   |   |   |    |   |   |   |    |    |
| 43 |             |   |   |   |   |   |   |   |   |   |   |   |   |   |    |   |   |   |    |    |
| 44 |             |   |   |   |   |   |   |   |   |   |   |   |   |   |    |   |   |   |    |    |
| 45 |             |   |   |   |   |   |   |   |   |   |   |   |   |   |    |   |   |   |    |    |
| 46 |             |   |   |   |   |   |   |   |   |   |   |   |   |   |    |   |   |   |    |    |

1  
2  
3  
4  
5  
6  
7  
8  
9  
10  
11  
12  
13  
14  
15  
16  
17  
18  
19  
20  
21  
22  
23  
24  
25  
26  
27  
28  
29  
30  
31  
32  
33  
34  
35  
36  
37  
38  
39  
40  
41  
42  
43  
44  
45  
46

|                    |   |   |   |   |   |   |   |   |    |   |   |   |    |    |    |   |   |    |    |    |
|--------------------|---|---|---|---|---|---|---|---|----|---|---|---|----|----|----|---|---|----|----|----|
| Lu RF              | Y | Y | N | Y | Y | Y | Y | Y | Y  | N | Y | Y | Y  | Y  | NM | Y | Y | Y  | N  | Y  |
| Lu XX              | Y | Y | N | Y | Y | Y | Y | Y | Y  | N | Y | Y | Y  | Y  | NM | Y | N | N  | NM | NM |
| Lu Y               | Y | Y | N | Y | Y | Y | Y | Y | NM | N | Y | Y | Y  | Y  | NM | Y | Y | Y  | N  | Y  |
| Lucy Rivett        | Y | Y | N | Y | Y | Y | Y | Y | Y  | Y | Y | Y | Y  | Y  | NM | Y | Y | Y  | N  | Y  |
| Luo SH             | Y | Y | N | Y | Y | Y | Y | N | Y  | N | Y | Y | Y  | Y  | Y  | Y | N | N  | N  | Y  |
| M.M. Arons         | Y | Y | N | Y | Y | Y | Y | Y | Y  | N | Y | Y | Y  | Y  | NM | Y | Y | Y  | NM | NM |
| Ma MM              | Y | Y | N | Y | Y | Y | Y | Y | Y  | Y | Y | Y | Y  | Y  | Y  | Y | Y | Y  | NM | NM |
| Ma Y               | Y | Y | N | Y | Y | Y | Y | Y | Y  | Y | Y | Y | Y  | Y  | NM | Y | Y | Y  | N  | Y  |
| Ma YL              | Y | Y | N | Y | Y | Y | Y | Y | Y  | Y | Y | Y | Y  | Y  | NM | Y | Y | N  | NM | NM |
| MacIntyre CR       | Y | Y | N | Y | Y | Y | Y | N | Y  | N | Y | Y | Y  | Y  | NM | Y | N | N  | N  | NM |
| Mahesh C. Patel    | Y | Y | N | Y | Y | Y | Y | Y | Y  | Y | Y | Y | Y  | Y  | Y  | Y | Y | Y  | N  | Y  |
| Martin C           | Y | Y | N | Y | Y | Y | Y | Y | Y  | N | Y | Y | Y  | Y  | NM | Y | Y | Y  | NM | Y  |
| Maru Sheela        | Y | Y | N | Y | Y | Y | Y | Y | Y  | Y | Y | Y | Y  | Y  | Y  | Y | Y | Y  | N  | Y  |
| McMichael TM       | Y | Y | N | Y | Y | Y | Y | Y | Y  | N | Y | Y | Y  | Y  | NM | Y | Y | Y  | NM | NM |
| Mei X              | Y | Y | N | Y | Y | Y | Y | Y | Y  | Y | Y | Y | Y  | Y  | NM | Y | Y | Y  | N  | Y  |
| Michael J. Fassett | Y | Y | N | Y | Y | Y | Y | Y | Y  | Y | Y | Y | Y  | Y  | NM | Y | Y | Y  | N  | NM |
| Michel Bielecki    | Y | Y | N | Y | Y | Y | Y | Y | Y  | N | Y | Y | Y  | Y  | NM | Y | Y | Y  | N  | Y  |
| Miyamae Y          | Y | Y | N | Y | Y | Y | Y | Y | Y  | N | Y | Y | Y  | Y  | NM | Y | Y | N  | N  | Y  |
| Mohammed A M Ahmed | Y | Y | N | Y | Y | Y | Y | Y | NM | Y | Y | Y | NM | NM | NM | Y | Y | Y  | N  | Y  |
| Moon SS            | Y | Y | N | Y | Y | Y | Y | Y | Y  | Y | Y | Y | Y  | Y  | NM | Y | Y | Y  | N  | Y  |
| Moriarty LF        | Y | Y | N | Y | Y | Y | Y | Y | Y  | N | Y | Y | Y  | Y  | NM | Y | Y | NM | N  | NM |
| Nagler AR          | Y | Y | N | Y | Y | Y | Y | Y | Y  | N | Y | Y | Y  | Y  | NM | Y | Y | N  | N  | NM |
| Niccolò Parri      | Y | Y | N | Y | Y | Y | Y | Y | Y  | Y | Y | Y | Y  | Y  | NM | Y | Y | Y  | N  | Y  |
| Niu YL             | Y | Y | N | Y | Y | Y | Y | Y | Y  | N | Y | Y | Y  | Y  | Y  | Y | Y | N  | NM | NM |
| Oduro-Mensah E     | Y | Y | N | Y | Y | Y | Y | Y | Y  | Y | Y | Y | Y  | Y  | NM | Y | Y | Y  | N  | Y  |

|    |                  |   |   |   |   |   |   |   |   |    |   |   |   |   |    |   |   |    |    |    |
|----|------------------|---|---|---|---|---|---|---|---|----|---|---|---|---|----|---|---|----|----|----|
| 1  |                  |   |   |   |   |   |   |   |   |    |   |   |   |   |    |   |   |    |    |    |
| 2  |                  |   |   |   |   |   |   |   |   |    |   |   |   |   |    |   |   |    |    |    |
| 3  |                  |   |   |   |   |   |   |   |   |    |   |   |   |   |    |   |   |    |    |    |
| 4  |                  |   |   |   |   |   |   |   |   |    |   |   |   |   |    |   |   |    |    |    |
| 5  | Ou JM            | Y | Y | N | Y | Y | Y | Y | Y | N  | Y | Y | Y | Y | NM | Y | Y | N  | N  | NM |
| 6  | Pan XQ           | Y | Y | N | Y | Y | Y | Y | Y | N  | Y | Y | Y | Y | NM | Y | Y | N  | NM | Y  |
| 7  |                  |   |   |   |   |   |   |   |   |    |   |   |   |   |    |   |   |    |    |    |
| 8  | Pérez-GarcíaF    | Y | Y | N | Y | Y | Y | Y | Y | Y  | Y | Y | Y | Y | NM | Y | Y | Y  | N  | Y  |
| 9  | Pongpirul W      | Y | Y | N | Y | Y | Y | Y | Y | Y  | Y | Y | Y | Y | Y  | Y | Y | Y  | N  | Y  |
| 10 | Pongpirul WA     | Y | Y | N | Y | Y | Y | Y | Y | Y  | Y | Y | Y | Y | Y  | Y | Y | Y  | N  | Y  |
| 11 |                  |   |   |   |   |   |   |   |   |    |   |   |   |   |    |   |   |    |    |    |
| 12 | Qiu CF           | Y | Y | N | Y | Y | Y | Y | Y | Y  | Y | Y | Y | Y | NM | Y | Y | Y  | N  | Y  |
| 13 | Redditt V        | Y | Y | N | Y | Y | Y | Y | Y | N  | Y | Y | Y | Y | NM | Y | Y | Y  | N  | Y  |
| 14 | Roman G. Shmakov | Y | Y | N | Y | Y | Y | Y | Y | Y  | Y | Y | Y | Y | NM | Y | Y | Y  | N  | NM |
| 15 |                  |   |   |   |   |   |   |   |   |    |   |   |   |   |    |   |   |    |    |    |
| 16 | Rubbi I          | Y | Y | N | Y | Y | Y | Y | Y | NM | Y | Y | Y | Y | NM | Y | Y | N  | N  | NM |
| 17 | Salim Mattar     | Y | Y | N | Y | Y | Y | Y | Y | N  | Y | Y | Y | Y | NM | Y | Y | N  | NM | Y  |
| 18 |                  |   |   |   |   |   |   |   |   |    |   |   |   |   |    |   |   |    |    |    |
| 19 | Seong Eun Kim    | Y | Y | N | Y | Y | Y | Y | Y | N  | Y | Y | Y | Y | NM | Y | Y | N  | N  | Y  |
| 20 | Shaher M. Samrah | Y | Y | N | Y | Y | Y | Y | Y | Y  | Y | Y | Y | Y | NM | Y | Y | Y  | N  | Y  |
| 21 |                  |   |   |   |   |   |   |   |   |    |   |   |   |   |    |   |   |    |    |    |
| 22 | She X            | Y | Y | N | Y | Y | Y | Y | Y | N  | Y | Y | Y | Y | Y  | Y | Y | N  | NM | NM |
| 23 | Son H            | Y | Y | N | Y | Y | Y | Y | Y | Y  | Y | Y | Y | Y | NM | Y | Y | N  | N  | Y  |
| 24 | Song W           | Y | Y | N | Y | Y | Y | Y | Y | N  | Y | Y | Y | Y | NM | Y | Y | Y  | N  | NM |
| 25 |                  |   |   |   |   |   |   |   |   |    |   |   |   |   |    |   |   |    |    |    |
| 26 | Song YS          | Y | Y | N | Y | Y | Y | Y | Y | NM | N | Y | Y | Y | NM | Y | Y | N  | N  | Y  |
| 27 | Spiteri G        | Y | Y | N | Y | Y | Y | Y | Y | Y  | Y | Y | Y | Y | NM | Y | Y | N  | N  | NM |
| 28 | Sun DF           | Y | Y | N | Y | Y | Y | Y | Y | N  | Y | Y | Y | Y | NM | Y | Y | N  | NM | NM |
| 29 |                  |   |   |   |   |   |   |   |   |    |   |   |   |   |    |   |   |    |    |    |
| 30 | Sun WW           | Y | Y | N | Y | Y | Y | Y | N | Y  | Y | Y | Y | Y | NM | Y | Y | NM | NM | NM |
| 31 | Sun Z            | Y | Y | N | Y | Y | Y | Y | Y | Y  | Y | Y | Y | Y | NM | Y | Y | N  | NM | NM |
| 32 | Tang A           | Y | Y | N | Y | Y | Y | Y | Y | N  | Y | Y | Y | Y | NM | Y | Y | N  | NM | NM |
| 33 |                  |   |   |   |   |   |   |   |   |    |   |   |   |   |    |   |   |    |    |    |
| 34 | Tang Olive       | Y | Y | N | Y | Y | Y | Y | Y | Y  | Y | Y | Y | Y | Y  | Y | Y | Y  | N  | NM |
| 35 | Thiel SL         | Y | Y | N | Y | Y | Y | Y | Y | Y  | Y | Y | Y | Y | NM | Y | Y | Y  | N  | NM |
| 36 |                  |   |   |   |   |   |   |   |   |    |   |   |   |   |    |   |   |    |    |    |
| 37 | Tian SC          | Y | Y | N | Y | Y | Y | Y | Y | Y  | Y | Y | Y | Y | NM | Y | Y | Y  | N  | Y  |
| 38 | Tian SJ          | Y | Y | N | Y | Y | Y | Y | Y | Y  | Y | Y | Y | Y | NM | Y | Y | Y  | N  | Y  |
| 39 |                  |   |   |   |   |   |   |   |   |    |   |   |   |   |    |   |   |    |    |    |
| 40 |                  |   |   |   |   |   |   |   |   |    |   |   |   |   |    |   |   |    |    |    |
| 41 |                  |   |   |   |   |   |   |   |   |    |   |   |   |   |    |   |   |    |    |    |
| 42 |                  |   |   |   |   |   |   |   |   |    |   |   |   |   |    |   |   |    |    |    |
| 43 |                  |   |   |   |   |   |   |   |   |    |   |   |   |   |    |   |   |    |    |    |
| 44 |                  |   |   |   |   |   |   |   |   |    |   |   |   |   |    |   |   |    |    |    |
| 45 |                  |   |   |   |   |   |   |   |   |    |   |   |   |   |    |   |   |    |    |    |
| 46 |                  |   |   |   |   |   |   |   |   |    |   |   |   |   |    |   |   |    |    |    |

1  
2  
3  
4  
5  
6  
7  
8  
9  
10  
11  
12  
13  
14  
15  
16  
17  
18  
19  
20  
21  
22  
23  
24  
25  
26  
27  
28  
29  
30  
31  
32  
33  
34  
35  
36  
37  
38  
39  
40  
41  
42  
43  
44  
45  
46

|                   |   |   |   |   |   |   |   |   |    |   |   |   |   |   |    |   |   |    |    |    |
|-------------------|---|---|---|---|---|---|---|---|----|---|---|---|---|---|----|---|---|----|----|----|
| Timothy J. Judson | Y | Y | N | Y | Y | Y | Y | Y | NM | Y | Y | Y | Y | Y | NM | Y | Y | Y  | N  | NM |
| Tolia VM          | Y | Y | N | Y | Y | Y | Y | Y | Y  | Y | Y | Y | Y | Y | NM | Y | Y | Y  | N  | NM |
| Tong H            | Y | Y | N | Y | Y | Y | Y | Y | Y  | N | Y | Y | Y | Y | NM | Y | Y | N  | NM | NM |
| Tong ZD           | Y | Y | N | Y | Y | Y | Y | Y | Y  | N | Y | Y | Y | Y | Y  | Y | Y | Y  | NM | Y  |
| Treibel TA        | Y | Y | N | Y | Y | Y | Y | Y | Y  | N | Y | Y | Y | Y | NM | Y | Y | N  | NM | NM |
| Tsou Tsung-Pei    | Y | Y | N | Y | Y | Y | Y | Y | Y  | N | Y | Y | Y | Y | NM | Y | Y | Y  | N  | Y  |
| Viktoriya London  | Y | Y | N | Y | Y | Y | Y | Y | Y  | Y | Y | Y | Y | Y | NM | Y | Y | Y  | N  | NM |
| Wan R             | Y | Y | N | Y | Y | Y | Y | Y | Y  | N | Y | Y | Y | Y | NM | Y | Y | Y  | N  | Y  |
| Wang AH           | Y | Y | N | Y | Y | Y | Y | Y | Y  | Y | Y | Y | Y | Y | Y  | Y | Y | N  | NM | Y  |
| Wang D            | Y | Y | N | Y | Y | Y | Y | Y | Y  | N | Y | Y | Y | Y | NM | Y | Y | Y  | N  | Y  |
| Wang JC           | Y | Y | N | Y | Y | Y | Y | Y | Y  | N | Y | Y | Y | Y | Y  | Y | Y | N  | NM | NM |
| Wang KS           | Y | Y | N | Y | Y | Y | Y | Y | NM | Y | Y | Y | Y | Y | Y  | Y | Y | NM | NM | NM |
| Wang L            | Y | Y | N | Y | Y | Y | Y | Y | Y  | N | Y | Y | Y | Y | NM | Y | Y | Y  | NM | NM |
| Wang LZ           | Y | Y | N | Y | Y | Y | Y | Y | Y  | N | Y | Y | Y | Y | NM | Y | Y | Y  | N  | Y  |
| Wang S            | Y | Y | N | Y | Y | Y | Y | Y | Y  | N | Y | Y | Y | Y | NM | Y | Y | N  | NM | NM |
| Wang T            | Y | Y | N | Y | Y | Y | Y | Y | NM | N | Y | Y | Y | Y | NM | Y | Y | N  | NM | NM |
| Wang XB           | Y | Y | N | Y | Y | Y | Y | Y | NM | Y | Y | Y | Y | Y | NM | Y | Y | Y  | N  | Y  |
| Wang XL           | Y | Y | N | Y | Y | Y | Y | Y | Y  | Y | Y | Y | Y | Y | NM | Y | Y | Y  | N  | Y  |
| Wang ZQ           | Y | Y | N | Y | Y | Y | Y | Y | Y  | Y | Y | Y | Y | Y | Y  | Y | Y | Y  | N  | Y  |
| Waya JLL          | Y | Y | N | Y | Y | Y | Y | Y | Y  | N | Y | Y | Y | Y | NM | Y | Y | Y  | N  | Y  |
| Wong HYF          | Y | Y | N | Y | Y | Y | Y | Y | Y  | Y | Y | Y | Y | Y | NM | Y | Y | Y  | NM | NM |
| Wong J            | Y | Y | N | Y | Y | Y | Y | Y | Y  | Y | Y | Y | Y | Y | NM | Y | Y | Y  | NM | Y  |
| Wu GY             | Y | Y | N | Y | Y | Y | Y | Y | Y  | Y | Y | Y | Y | Y | Y  | Y | Y | N  | NM | Y  |
| Wu HP             | Y | Y | N | Y | Y | Y | Y | Y | Y  | N | Y | Y | Y | Y | Y  | Y | Y | N  | NM | NM |
| Wu QR             | Y | Y | N | Y | Y | Y | Y | Y | Y  | N | Y | Y | Y | Y | NM | Y | Y | Y  | NM | NM |

|    |  |                         |   |   |   |   |   |   |   |   |    |   |   |   |   |    |   |   |    |    |    |
|----|--|-------------------------|---|---|---|---|---|---|---|---|----|---|---|---|---|----|---|---|----|----|----|
| 1  |  |                         |   |   |   |   |   |   |   |   |    |   |   |   |   |    |   |   |    |    |    |
| 2  |  |                         |   |   |   |   |   |   |   |   |    |   |   |   |   |    |   |   |    |    |    |
| 3  |  |                         |   |   |   |   |   |   |   |   |    |   |   |   |   |    |   |   |    |    |    |
| 4  |  |                         |   |   |   |   |   |   |   |   |    |   |   |   |   |    |   |   |    |    |    |
| 5  |  | Wu XQ                   | Y | Y | N | Y | Y | Y | Y | Y | Y  | Y | Y | Y | Y | Y  | Y | N | NM | NM |    |
| 6  |  | Wu Y                    | Y | Y | N | Y | Y | Y | Y | Y | N  | Y | Y | Y | Y | NM | Y | Y | N  | NM | NM |
| 7  |  | Wu YL                   | Y | Y | N | Y | Y | Y | Y | Y | Y  | Y | Y | Y | Y | NM | Y | Y | N  | NM | NM |
| 8  |  | Wu YL                   | Y | Y | N | Y | Y | Y | Y | Y | Y  | Y | Y | Y | Y | NM | Y | Y | N  | NM | NM |
| 9  |  | Xiang TX                | Y | Y | N | Y | Y | Y | Y | Y | NM | Y | Y | Y | Y | NM | Y | Y | N  | N  | NM |
| 10 |  | Xie JW                  | Y | Y | N | Y | Y | Y | Y | Y | Y  | Y | Y | Y | Y | NM | Y | Y | Y  | NM | NM |
| 11 |  | Xie JW                  | Y | Y | N | Y | Y | Y | Y | Y | Y  | Y | Y | Y | Y | NM | Y | Y | Y  | NM | NM |
| 12 |  | Xie YB                  | Y | Y | N | Y | Y | Y | Y | Y | N  | Y | Y | Y | Y | NM | Y | Y | N  | NM | NM |
| 13 |  | Xu HM                   | Y | Y | N | Y | Y | Y | Y | Y | Y  | Y | Y | Y | Y | NM | Y | Y | Y  | N  | Y  |
| 14 |  | Xu S                    | Y | Y | N | Y | Y | Y | Y | Y | Y  | Y | Y | Y | Y | NM | Y | Y | Y  | N  | Y  |
| 15 |  | Xu S                    | Y | Y | N | Y | Y | Y | Y | Y | Y  | Y | Y | Y | Y | NM | Y | Y | Y  | N  | Y  |
| 16 |  | Xu TM                   | Y | Y | N | Y | Y | Y | Y | Y | Y  | Y | Y | Y | Y | NM | Y | Y | Y  | N  | NM |
| 17 |  | Yan XQ                  | Y | Y | N | Y | Y | Y | Y | Y | Y  | Y | Y | Y | Y | NM | Y | Y | Y  | N  | Y  |
| 18 |  | Yan XQ                  | Y | Y | N | Y | Y | Y | Y | Y | Y  | Y | Y | Y | Y | NM | Y | Y | Y  | N  | Y  |
| 19 |  | Yang K                  | Y | Y | N | Y | Y | Y | Y | Y | NM | N | Y | Y | Y | NM | Y | Y | N  | NM | NM |
| 20 |  | Yang NB                 | Y | Y | N | Y | Y | Y | Y | Y | Y  | N | Y | Y | Y | NM | Y | Y | Y  | N  | Y  |
| 21 |  | Yang RR                 | Y | Y | N | Y | Y | Y | Y | Y | Y  | Y | Y | Y | Y | NM | Y | Y | Y  | N  | Y  |
| 22 |  | Yang RR                 | Y | Y | N | Y | Y | Y | Y | Y | Y  | Y | Y | Y | Y | NM | Y | Y | Y  | N  | Y  |
| 23 |  | Yang YL                 | Y | Y | N | Y | Y | Y | Y | Y | N  | Y | Y | Y | Y | NM | Y | Y | N  | NM | NM |
| 24 |  | Yang YX                 | Y | Y | N | Y | Y | Y | Y | Y | N  | Y | Y | Y | Y | NM | Y | Y | N  | NM | NM |
| 25 |  | Yang YX                 | Y | Y | N | Y | Y | Y | Y | Y | N  | Y | Y | Y | Y | NM | Y | Y | N  | NM | NM |
| 26 |  | Yao QD                  | Y | Y | N | Y | Y | Y | Y | Y | Y  | Y | Y | Y | Y | Y  | Y | Y | Y  | NM | NM |
| 27 |  | Yao XY                  | Y | Y | N | Y | Y | Y | Y | Y | Y  | Y | Y | Y | Y | Y  | Y | Y | Y  | NM | Y  |
| 28 |  | Yao XY                  | Y | Y | N | Y | Y | Y | Y | Y | Y  | Y | Y | Y | Y | Y  | Y | Y | Y  | NM | Y  |
| 29 |  | Yayla Burcu Ceylan Cura | Y | Y | N | Y | Y | Y | Y | Y | Y  | Y | Y | Y | Y | NM | Y | Y | Y  | N  | Y  |
| 30 |  | Ye XX                   | Y | Y | N | Y | Y | Y | Y | Y | NM | N | Y | Y | Y | NM | Y | Y | N  | NM | NM |
| 31 |  | Ye Y                    | Y | Y | N | Y | Y | Y | Y | Y | Y  | Y | Y | Y | Y | NM | Y | Y | Y  | NM | NM |
| 32 |  | Yu FT                   | Y | Y | N | Y | Y | Y | Y | Y | Y  | Y | Y | Y | Y | Y  | Y | Y | Y  | N  | NM |
| 33 |  | Yu FT                   | Y | Y | N | Y | Y | Y | Y | Y | Y  | Y | Y | Y | Y | Y  | Y | Y | Y  | N  | NM |
| 34 |  | Yu JX                   | Y | Y | N | Y | Y | Y | Y | Y | NM | N | Y | Y | Y | NM | Y | Y | N  | NM | Y  |
| 35 |  | Yu X                    | Y | Y | N | Y | Y | Y | Y | Y | Y  | Y | Y | Y | Y | Y  | Y | Y | N  | NM | NM |
| 36 |  | Yuan L                  | Y | Y | N | Y | Y | Y | Y | Y | Y  | Y | Y | Y | Y | NM | Y | Y | N  | NM | NM |
| 37 |  | Yuan L                  | Y | Y | N | Y | Y | Y | Y | Y | Y  | Y | Y | Y | Y | NM | Y | Y | N  | NM | NM |
| 38 |  | Yue HM                  | Y | Y | N | Y | Y | Y | Y | Y | Y  | Y | Y | Y | Y | NM | Y | Y | Y  | N  | Y  |
| 39 |  |                         |   |   |   |   |   |   |   |   |    |   |   |   |   |    |   |   |    |    |    |
| 40 |  |                         |   |   |   |   |   |   |   |   |    |   |   |   |   |    |   |   |    |    |    |
| 41 |  |                         |   |   |   |   |   |   |   |   |    |   |   |   |   |    |   |   |    |    |    |
| 42 |  |                         |   |   |   |   |   |   |   |   |    |   |   |   |   |    |   |   |    |    |    |
| 43 |  |                         |   |   |   |   |   |   |   |   |    |   |   |   |   |    |   |   |    |    |    |
| 44 |  |                         |   |   |   |   |   |   |   |   |    |   |   |   |   |    |   |   |    |    |    |
| 45 |  |                         |   |   |   |   |   |   |   |   |    |   |   |   |   |    |   |   |    |    |    |
| 46 |  |                         |   |   |   |   |   |   |   |   |    |   |   |   |   |    |   |   |    |    |    |



1  
2  
3  
4  
5  
6  
7  
8  
9  
10  
11  
12  
13  
14  
15  
16  
17  
18  
19  
20  
21  
22  
23  
24  
25  
26  
27  
28  
29  
30  
31  
32  
33  
34  
35  
36  
37  
38  
39  
40  
41  
42  
43  
44  
45  
46

|          |   |   |   |   |   |   |   |   |    |   |   |   |   |   |    |   |   |   |    |    |
|----------|---|---|---|---|---|---|---|---|----|---|---|---|---|---|----|---|---|---|----|----|
| Zeng J   | Y | Y | N | Y | Y | Y | Y | Y | Y  | Y | Y | Y | Y | Y | NM | Y | Y | N | NM | NM |
| Zeng WZ  | Y | Y | N | Y | Y | Y | Y | Y | Y  | Y | Y | Y | Y | Y | Y  | Y | Y | N | NM | NM |
| Zhai HL  | Y | Y | N | Y | Y | Y | Y | Y | Y  | N | Y | Y | Y | Y | NM | Y | Y | N | NM | NM |
| Zhan H   | Y | Y | N | Y | Y | Y | Y | Y | Y  | N | Y | Y | Y | Y | NM | Y | Y | N | NM | NM |
| Zhan T   | Y | Y | N | Y | Y | Y | Y | Y | Y  | Y | Y | Y | Y | Y | NM | Y | Y | Y | N  | Y  |
| Zhang JJ | Y | Y | N | Y | Y | Y | Y | N | NM | N | Y | Y | Y | Y | NM | Y | N | N | N  | Y  |
| Zhang KY | Y | Y | N | Y | Y | Y | Y | Y | Y  | N | Y | Y | Y | Y | Y  | Y | Y | N | N  | Y  |
| Zhang L  | Y | Y | N | Y | Y | Y | Y | Y | Y  | Y | Y | Y | Y | Y | Y  | Y | Y | N | N  | Y  |
| Zhang R  | Y | Y | N | Y | Y | Y | Y | Y | Y  | Y | Y | Y | Y | Y | NM | Y | Y | N | NM | NM |
| Zhang Y  | Y | Y | N | Y | Y | Y | Y | Y | Y  | Y | Y | Y | Y | Y | NM | Y | Y | Y | N  | Y  |
| Zhang YC | Y | Y | N | Y | Y | Y | Y | Y | Y  | N | Y | Y | Y | Y | Y  | Y | Y | Y | NM | Y  |
| Zhang YD | Y | Y | N | Y | Y | Y | Y | Y | Y  | N | Y | Y | Y | Y | NM | Y | Y | N | NM | NM |
| Zhao L   | Y | Y | N | Y | Y | Y | Y | Y | Y  | Y | Y | Y | Y | Y | Y  | Y | Y | N | NM | NM |
| Zhong ZM | Y | Y | N | Y | Y | Y | Y | Y | Y  | N | Y | Y | Y | Y | Y  | Y | Y | N | N  | NM |
| Zhou H   | Y | Y | N | Y | Y | Y | Y | Y | Y  | N | Y | Y | Y | Y | NM | Y | Y | N | NM | NM |
| Zhou JL  | Y | Y | N | Y | Y | Y | Y | Y | Y  | N | Y | Y | Y | Y | NM | Y | Y | N | NM | NM |
| Zhou R   | Y | Y | N | Y | Y | Y | Y | Y | Y  | N | Y | Y | Y | Y | NM | Y | Y | N | NM | Y  |
| Zhu JF   | Y | Y | N | Y | Y | Y | Y | Y | Y  | Y | Y | Y | Y | Y | NM | Y | Y | Y | N  | Y  |
| Zhu MR   | Y | Y | N | Y | Y | Y | Y | Y | Y  | Y | Y | Y | Y | Y | NM | Y | Y | N | NM | NM |
| Zhu SQ   | Y | Y | N | Y | Y | Y | Y | Y | Y  | N | Y | Y | Y | Y | NM | Y | Y | Y | NM | NM |

Y, Yes; N, Not; NM, not mentioned.

1  
2  
3 According to quality of cross-sectional studies (AXIS) scale (Downes MJ, Brennan  
4 ML, Williams HC, Dean RS. Development of a critical appraisal tool to assess the  
5 quality of cross-sectional studies (AXIS). *BMJ open* 2016; **6**(12): e011458.):  
6  
7

8  
9 *Introduction*

10 1. Were the aims/objectives of the study clear?  
11

12  
13 *Methods*

14 2. Was the study design appropriate for the stated aim(s)?

15 3. Was the sample size justified?

16 4. Was the target/reference population clearly defined? (Is it clear who the research  
17 was about?)

18 5. Was the sample frame taken from an appropriate population base so that it  
19 closely represented the target/reference population under investigation?

20 6. Was the selection process likely to select subjects/participants that were  
21 representative of the target/reference population under investigation?

22 7. Were measures undertaken to address and categorise non-responders?

23 8. Were the risk factor and outcome variables measured appropriate to the aims of  
24 the study?

25 9. Were the risk factor and outcome variables measured correctly using instruments/  
26 measurements that had been trialled, piloted or published previously?

27 10. Is it clear what was used to determined statistical significance and/or precision  
28 estimates? (eg, p values, CIs)

29 11. Were the methods (including statistical methods) sufficiently described to  
30 enable them to be repeated?  
31

32  
33  
34  
35  
36  
37  
38 *Results*

39 12. Were the basic data adequately described?

40 13. Does the response rate raise concerns about non-response bias?

41 14. If appropriate, was information about non-responders described?

42 15. Were the results internally consistent?

43 16. Were the results for the analyses described in the methods, presented?  
44  
45  
46

47  
48  
49  
50  
51  
52  
53 *Discussion*

54 17. Were the authors' discussions and conclusions justified by the results?

55 18. Were the limitations of the study discussed?  
56  
57

58  
59  
60 *Other*

19. Were there any funding sources or conflicts of interest that may affect the  
authors' interpretation of the results?

20. Was ethical approval or consent of participants attained?

**Supplementary Table 4 Results of sensitivity analysis**

| <b>Study omitted</b>                              | <b>Estimate</b> | <b>[95% Conf. Interval]</b> |           |
|---------------------------------------------------|-----------------|-----------------------------|-----------|
| Abey Suriya Sanduni                               | 0.24138328      | 0.2359522                   | 0.2468143 |
| Adedeji Idris Abiodun                             | 0.24126983      | 0.2358378                   | 0.2467018 |
| Adetola Hammed Hassan                             | 0.24140392      | 0.2359729                   | 0.246835  |
| Aherfi Sarah                                      | 0.24146682      | 0.2360346                   | 0.246899  |
| Almazeedi Sulaiman                                | 0.2395409       | 0.234087                    | 0.2449948 |
| Alshahrani Mohammed S                             | 0.24135832      | 0.2359271                   | 0.2467896 |
| Alshukry Abdullah                                 | 0.24093036      | 0.235491                    | 0.24637   |
| Alsofayan Yousef M                                | 0.2423633       | 0.236915                    | 0.247811  |
| Alvin J Ing                                       | 0.24085474      | 0.235421                    | 0.246288  |
| Amy V. Dora                                       | 0.2414076       | 0.235976                    | 0.246839  |
| An YH                                             | 0.24142824      | 0.235997                    | 0.246859  |
| Andrea Lombardi                                   | 0.24154645      | 0.236113                    | 0.24698   |
| Antonio-Villa Neftali Eduardo                     | 0.26132575      | 0.2556445                   | 0.267007  |
| Arima                                             | 0.24140991      | 0.2359788                   | 0.2468411 |
| Ashinyo Mary Eyram                                | 0.2399627       | 0.2345254                   | 0.2454    |
| Atakla Hugues Ghislain                            | 0.24140076      | 0.2359691                   | 0.2468324 |
| Backer JA                                         | 0.24156743      | 0.236135                    | 0.247     |
| Bai M                                             | 0.24201234      | 0.236572                    | 0.247453  |
| Bai R                                             | 0.24144937      | 0.236016                    | 0.246883  |
| Bai SL                                            | 0.24139151      | 0.23596                     | 0.246823  |
| Bhakti Sarangi                                    | 0.24128741      | 0.235855                    | 0.246719  |
| Bianco Angela                                     | 0.2414328       | 0.236001                    | 0.246864  |
| Bin YF                                            | 0.24151391      | 0.236082                    | 0.246946  |
| Blain Hubert                                      | 0.24141634      | 0.235985                    | 0.246848  |
| Böhmer                                            | 0.24143349      | 0.236002                    | 0.246865  |
| Breslin Noelle                                    | 0.24139062      | 0.235959                    | 0.246822  |
| Bruminhent Jackrapong                             | 0.24150243      | 0.2360704                   | 0.2469344 |
| Cai Jiehao                                        | 0.24134758      | 0.235916                    | 0.246779  |
| Cao JM                                            | 0.24137202      | 0.235941                    | 0.246803  |
| Carla Felice                                      | 0.24140568      | 0.235974                    | 0.246837  |
| Chan JFW                                          | 0.24142247      | 0.235991                    | 0.246853  |
| Chen B                                            | 0.24150895      | 0.236077                    | 0.246941  |
| Chen J                                            | 0.24182814      | 0.236392                    | 0.247264  |
| Chen T                                            | 0.24148329      | 0.236051                    | 0.246916  |
| Chen Y                                            | 0.24154295      | 0.236108                    | 0.246978  |
| Chen YJ                                           | 0.24160017      | 0.236166                    | 0.247034  |
| Cheng ZP                                          | 0.24145818      | 0.236027                    | 0.24689   |
| Choe PG                                           | 0.2412125       | 0.235779                    | 0.246646  |
| COVID-19 National Incident Room Surveillance Team | 0.24089625      | 0.2354592                   | 0.2463333 |

|    |                        |            |           |           |
|----|------------------------|------------|-----------|-----------|
| 1  |                        |            |           |           |
| 2  |                        |            |           |           |
| 3  | Dai Y                  | 0.24140795 | 0.235977  | 0.246839  |
| 4  | Daniela Loconsole      | 0.24092582 | 0.235491  | 0.24636   |
| 5  | Ding Y                 | 0.24150026 | 0.236068  | 0.246932  |
| 6  | Dong X                 | 0.24143203 | 0.236001  | 0.246863  |
| 7  | Dong XC                | 0.2416393  | 0.236206  | 0.247073  |
| 8  | Dong YY                | 0.24137929 | 0.235948  | 0.246811  |
| 9  | Erinoso Olufemi A.     | 0.23952371 | 0.23408   | 0.244968  |
| 10 | Eythorsson Elias       | 0.24370873 | 0.238245  | 0.249173  |
| 11 | Fakiri EL K            | 0.24113926 | 0.235707  | 0.246572  |
| 12 | Fan YZ                 | 0.24148887 | 0.236056  | 0.246921  |
| 13 | Feaster Matt           | 0.24184601 | 0.236402  | 0.24729   |
| 14 | Feng XP                | 0.24145405 | 0.236022  | 0.246886  |
| 15 | Foster Catherine E.    | 0.24219659 | 0.2367402 | 0.247653  |
| 16 | Friederike Maechler    | 0.24145871 | 0.236026  | 0.246892  |
| 17 | Gao HJ                 | 0.24146272 | 0.236031  | 0.246894  |
| 18 | Gao T                  | 0.24143969 | 0.236008  | 0.246871  |
| 19 | Gautret P              | 0.24153928 | 0.236106  | 0.246973  |
| 20 | Gill Livingston        | 0.23967291 | 0.2342354 | 0.2451104 |
| 21 | Grados Isabel Zumalave | 0.24133743 | 0.235903  | 0.246772  |
| 22 | Graham N.S.N.          | 0.2413419  | 0.235908  | 0.246776  |
| 23 | Grechukhina Olga       | 0.24149908 | 0.236064  | 0.246934  |
| 24 | Gu. Kim                | 0.24189922 | 0.236461  | 0.247337  |
| 25 | Guo CX                 | 0.24148878 | 0.236056  | 0.246922  |
| 26 | Han RD                 | 0.24145339 | 0.236022  | 0.246885  |
| 27 | He M                   | 0.24144486 | 0.236012  | 0.246878  |
| 28 | He WB                  | 0.24279851 | 0.237349  | 0.248248  |
| 29 | Hu SX                  | 0.24153839 | 0.236106  | 0.246971  |
| 30 | Huang DD               | 0.24127801 | 0.235846  | 0.24671   |
| 31 | IH Huerta Saenz        | 0.24148321 | 0.236051  | 0.246915  |
| 32 | Ipekci A               | 0.24095382 | 0.235521  | 0.246387  |
| 33 | Irene Petersen         | 0.24137411 | 0.235943  | 0.246805  |
| 34 | Jennifer S. Singer     | 0.24134545 | 0.23591   | 0.246781  |
| 35 | Jeong SJ               | 0.24137802 | 0.235947  | 0.246809  |
| 36 | Jha S                  | 0.24147981 | 0.236048  | 0.246912  |
| 37 | Ji GH                  | 0.39626896 | 0.389306  | 0.403232  |
| 38 | Ji T                   | 0.24152319 | 0.236091  | 0.246955  |
| 39 | Jia CY                 | 0.24161656 | 0.236181  | 0.247052  |
| 40 | Jiang CH               | 0.23967837 | 0.234267  | 0.24509   |
| 41 | Jiang R                | 0.24145818 | 0.236027  | 0.24689   |
| 42 | Jibrin YB              | 0.24119677 | 0.235764  | 0.246629  |
| 43 | Jin MH                 | 0.24143013 | 0.235999  | 0.246861  |
| 44 | Jung CY                | 0.20909713 | 0.203439  | 0.214755  |
| 45 | Kang M                 | 0.24147271 | 0.236041  | 0.246904  |
| 46 |                        |            |           |           |
| 47 |                        |            |           |           |
| 48 |                        |            |           |           |
| 49 |                        |            |           |           |
| 50 |                        |            |           |           |
| 51 |                        |            |           |           |
| 52 |                        |            |           |           |
| 53 |                        |            |           |           |
| 54 |                        |            |           |           |
| 55 |                        |            |           |           |
| 56 |                        |            |           |           |
| 57 |                        |            |           |           |
| 58 |                        |            |           |           |
| 59 |                        |            |           |           |
| 60 |                        |            |           |           |

|    |                   |            |          |          |
|----|-------------------|------------|----------|----------|
| 1  |                   |            |          |          |
| 2  |                   |            |          |          |
| 3  | Kasper MR         | 0.23947349 | 0.234015 | 0.244932 |
| 4  | Ke B              | 0.24140336 | 0.235972 | 0.246835 |
| 5  | Kenu E            | 0.15292338 | 0.147079 | 0.158767 |
| 6  | Ki M              | 0.24144812 | 0.236017 | 0.24688  |
| 7  | Kirenga Bruce     | 0.24127552 | 0.235843 | 0.246708 |
| 8  | Kong WF           | 0.24159901 | 0.236157 | 0.247041 |
| 9  | Krajcar N         | 0.24111447 | 0.235679 | 0.24655  |
| 10 | Kristin J. Meyers | 0.2409627  | 0.23553  | 0.246395 |
| 11 | Kumar R           | 0.24101612 | 0.23558  | 0.246452 |
| 12 | Ladhani Shamez N  | 0.24109717 | 0.235664 | 0.24653  |
| 13 | Lai XQ            | 0.24160057 | 0.236167 | 0.247034 |
| 14 | Le TQM            | 0.24143392 | 0.236003 | 0.246865 |
| 15 | Lee YH            | 0.23829599 | 0.232852 | 0.24374  |
| 16 | Lei MY            | 0.24149777 | 0.236064 | 0.246932 |
| 17 | Lewis Megan       | 0.24142997 | 0.235998 | 0.246862 |
| 18 | Li CY             | 0.24142441 | 0.235993 | 0.246855 |
| 19 | Li J              | 0.2413753  | 0.235944 | 0.246807 |
| 20 | Li W              | 0.24139515 | 0.235964 | 0.246826 |
| 21 | Li Y              | 0.24150647 | 0.236075 | 0.246938 |
| 22 | Li Y              | 0.24149327 | 0.23606  | 0.246927 |
| 23 | Li YL             | 0.24131729 | 0.235881 | 0.246753 |
| 24 | Liao XN           | 0.24145868 | 0.236027 | 0.24689  |
| 25 | Lin S             | 0.2416722  | 0.236238 | 0.247106 |
| 26 | Lin XM            | 0.24143092 | 0.236    | 0.246862 |
| 27 | Lin ZF            | 0.24168462 | 0.236249 | 0.24712  |
| 28 | Liu B             | 0.24142013 | 0.235989 | 0.246851 |
| 29 | Liu BM            | 0.24126719 | 0.235835 | 0.2467   |
| 30 | Liu BY            | 0.24125627 | 0.235823 | 0.246689 |
| 31 | Liu DH            | 0.24143161 | 0.236    | 0.246863 |
| 32 | Liu F             | 0.24143013 | 0.235999 | 0.246861 |
| 33 | Liu F             | 0.24139389 | 0.235963 | 0.246825 |
| 34 | Liu GT            | 0.24147211 | 0.23604  | 0.246904 |
| 35 | Liu MQ            | 0.24140359 | 0.235973 | 0.246835 |
| 36 | Liu X             | 0.24142049 | 0.23599  | 0.246851 |
| 37 | Liu XX            | 0.24142915 | 0.235996 | 0.246862 |
| 38 | Liu XX            | 0.24139974 | 0.235969 | 0.246831 |
| 39 | Liu YL            | 0.2414358  | 0.236005 | 0.246867 |
| 40 | Liu YX            | 0.24143392 | 0.236003 | 0.246865 |
| 41 | Liu ZR            | 0.24143161 | 0.236    | 0.246863 |
| 42 | Lu RF             | 0.24146377 | 0.236032 | 0.246895 |
| 43 | Lu XX             | 0.24152887 | 0.236094 | 0.246963 |
| 44 | Lu Y              | 0.24142824 | 0.235997 | 0.246859 |
| 45 | Lucy Rivett       | 0.2412927  | 0.235861 | 0.246725 |
| 46 |                   |            |          |          |
| 47 |                   |            |          |          |
| 48 |                   |            |          |          |
| 49 |                   |            |          |          |
| 50 |                   |            |          |          |
| 51 |                   |            |          |          |
| 52 |                   |            |          |          |
| 53 |                   |            |          |          |
| 54 |                   |            |          |          |
| 55 |                   |            |          |          |
| 56 |                   |            |          |          |
| 57 |                   |            |          |          |
| 58 |                   |            |          |          |
| 59 |                   |            |          |          |
| 60 |                   |            |          |          |

1  
2  
3  
4  
5  
6  
7  
8  
9  
10  
11  
12  
13  
14  
15  
16  
17  
18  
19  
20  
21  
22  
23  
24  
25  
26  
27  
28  
29  
30  
31  
32  
33  
34  
35  
36  
37  
38  
39  
40  
41  
42  
43  
44  
45  
46  
47  
48  
49  
50  
51  
52  
53  
54  
55  
56  
57  
58  
59  
60

|                    |            |           |          |
|--------------------|------------|-----------|----------|
| Luo SH             | 0.24151178 | 0.236079  | 0.246944 |
| M.M. Arons         | 0.24129912 | 0.235867  | 0.246731 |
| Ma MM              | 0.24198274 | 0.236544  | 0.247421 |
| Ma Y               | 0.24142143 | 0.23599   | 0.246853 |
| Ma YL              | 0.24116221 | 0.235729  | 0.246596 |
| MacIntyre CR       | 0.2413937  | 0.235963  | 0.246825 |
| Mahesh C. Patel    | 0.24138328 | 0.235952  | 0.246815 |
| Martin C           | 0.24125469 | 0.235823  | 0.246686 |
| Maru Sheela        | 0.24124874 | 0.235817  | 0.246681 |
| McMichael TM       | 0.24167565 | 0.236241  | 0.24711  |
| Mei X              | 0.24203795 | 0.236597  | 0.247479 |
| Michael J. Fassett | 0.2413168  | 0.235886  | 0.246748 |
| Michel Bielecki    | 0.24087179 | 0.235436  | 0.246307 |
| Miyamae Y          | 0.24134462 | 0.235913  | 0.246776 |
| Mohammed A M Ahmed | 0.24144942 | 0.236011  | 0.246888 |
| Moon SS            | 0.24018952 | 0.234744  | 0.245635 |
| Moriarty LF        | 0.24082564 | 0.235355  | 0.246297 |
| Nagler AR          | 0.24151158 | 0.236077  | 0.246946 |
| Niccolò Parri      | 0.24141984 | 0.235989  | 0.246851 |
| Niu YL             | 0.24141984 | 0.2359887 | 0.246851 |
| Oduro-Mensah E     | 0.24083592 | 0.235399  | 0.246273 |
| Ou JM              | 0.24195018 | 0.236513  | 0.247387 |
| Pan XQ             | 0.2414919  | 0.23606   | 0.246924 |
| Pérez-GarcíaF      | 0.24040096 | 0.234952  | 0.24585  |
| Pongpirul W        | 0.24167772 | 0.236243  | 0.247113 |
| Pongpirul WA       | 0.24143203 | 0.236001  | 0.246863 |
| Qiu CF             | 0.24157399 | 0.236141  | 0.247007 |
| Redditt V          | 0.24141118 | 0.23598   | 0.246843 |
| Roman G. Shmakov   | 0.24152265 | 0.23609   | 0.246955 |
| Rubbi I            | 0.24134435 | 0.235913  | 0.246776 |
| Salim Mattar       | 0.24145077 | 0.236018  | 0.246883 |
| Seong Eun Kim      | 0.24128388 | 0.235851  | 0.246716 |
| Shaher M. Samrah   | 0.24142824 | 0.235997  | 0.246859 |
| She X              | 0.24152738 | 0.236094  | 0.246961 |
| Son H              | 0.24138598 | 0.235955  | 0.246817 |
| Song W             | 0.24144328 | 0.236012  | 0.246875 |
| Song YS            | 0.24147455 | 0.236043  | 0.246906 |
| Spiteri G          | 0.24146748 | 0.236036  | 0.246899 |
| Sun DF             | 0.24173021 | 0.236291  | 0.247169 |
| Sun WW             | 0.24142715 | 0.235996  | 0.246858 |
| Sun Z              | 0.24139789 | 0.235967  | 0.246829 |
| Tang A             | 0.23954514 | 0.234099  | 0.244992 |
| Tang Olive         | 0.24158044 | 0.236148  | 0.247013 |

|    |                   |            |          |          |
|----|-------------------|------------|----------|----------|
| 1  |                   |            |          |          |
| 2  |                   |            |          |          |
| 3  | Thiel SL          | 0.24143378 | 0.236002 | 0.246865 |
| 4  | Tian SC           | 0.24143378 | 0.236002 | 0.246865 |
| 5  | Tian SJ           | 0.24180609 | 0.23637  | 0.247242 |
| 6  | Timothy J. Judson | 0.24145781 | 0.236026 | 0.246889 |
| 7  | Tolia VM          | 0.2414328  | 0.236001 | 0.246864 |
| 8  | Tong H            | 0.24140796 | 0.235977 | 0.246839 |
| 9  | Tong ZD           | 0.24377097 | 0.238308 | 0.249234 |
| 10 | Treibel TA        | 0.24152794 | 0.236095 | 0.246961 |
| 11 | Tsou Tsung-Pei    | 0.24154887 | 0.236116 | 0.246981 |
| 12 | Viktoriya London  | 0.24156342 | 0.236131 | 0.246996 |
| 13 | Wan R             | 0.24154887 | 0.236116 | 0.246981 |
| 14 | Wang AH           | 0.24156342 | 0.236131 | 0.246996 |
| 15 | Wang D            | 0.24123849 | 0.235806 | 0.246671 |
| 16 | Wang JC           | 0.24150059 | 0.236069 | 0.246933 |
| 17 | Wang KS           | 0.24141203 | 0.235981 | 0.246843 |
| 18 | Wang L            | 0.24143349 | 0.236002 | 0.246865 |
| 19 | Wang LZ           | 0.24141307 | 0.235982 | 0.246845 |
| 20 | Wang S            | 0.24100789 | 0.235576 | 0.24644  |
| 21 | Wang T            | 0.24150462 | 0.236073 | 0.246937 |
| 22 | Wang XB           | 0.24307795 | 0.237626 | 0.24853  |
| 23 | Wang XL           | 0.24240948 | 0.236966 | 0.247853 |
| 24 | Wang ZQ           | 0.24137998 | 0.235949 | 0.246811 |
| 25 | Waya JLL          | 0.23534326 | 0.229884 | 0.240802 |
| 26 | Wong HYF          | 0.24146868 | 0.236036 | 0.246901 |
| 27 | Wong J            | 0.24125358 | 0.23582  | 0.246687 |
| 28 | Wu GY             | 0.24159715 | 0.236164 | 0.24703  |
| 29 | Wu HP             | 0.24143876 | 0.236007 | 0.24687  |
| 30 | Wu QR             | 0.24150616 | 0.236074 | 0.246938 |
| 31 | Wu XQ             | 0.24134462 | 0.235913 | 0.246776 |
| 32 | Wu Y              | 0.24145445 | 0.236023 | 0.246886 |
| 33 | Wu YL             | 0.24137738 | 0.235946 | 0.246808 |
| 34 | Xiang TX          | 0.24148725 | 0.236055 | 0.246919 |
| 35 | Xie JW            | 0.24140583 | 0.235975 | 0.246837 |
| 36 | Xie YB            | 0.24145308 | 0.236021 | 0.246885 |
| 37 | Xu HM             | 0.24143219 | 0.236001 | 0.246864 |
| 38 | Xu S              | 0.24144374 | 0.236012 | 0.246875 |
| 39 | Xu TM             | 0.2414677  | 0.236036 | 0.2469   |
| 40 | Yan XQ            | 0.24163942 | 0.236204 | 0.247075 |
| 41 | Yang K            | 0.24142464 | 0.235993 | 0.246857 |
| 42 | Yang NB           | 0.24142592 | 0.235995 | 0.246857 |
| 43 | Yang RR           | 0.24130918 | 0.235877 | 0.246742 |
| 44 | Yang YL           | 0.24142633 | 0.235995 | 0.246857 |
| 45 | Yang YX           | 0.24157517 | 0.236142 | 0.247008 |
| 46 |                   |            |          |          |
| 47 |                   |            |          |          |
| 48 |                   |            |          |          |
| 49 |                   |            |          |          |
| 50 |                   |            |          |          |
| 51 |                   |            |          |          |
| 52 |                   |            |          |          |
| 53 |                   |            |          |          |
| 54 |                   |            |          |          |
| 55 |                   |            |          |          |
| 56 |                   |            |          |          |
| 57 |                   |            |          |          |
| 58 |                   |            |          |          |
| 59 |                   |            |          |          |
| 60 |                   |            |          |          |

|    |                         |            |           |           |
|----|-------------------------|------------|-----------|-----------|
| 1  |                         |            |           |           |
| 2  |                         |            |           |           |
| 3  | Yao QD                  | 0.24149534 | 0.236064  | 0.246927  |
| 4  | Yao XY                  | 0.24142441 | 0.235993  | 0.246855  |
| 5  | Yayla Burcu Ceylan Cura | 0.24140419 | 0.2359687 | 0.2468397 |
| 6  | Ye XX                   | 0.24142972 | 0.235999  | 0.246861  |
| 7  | Ye Y                    | 0.2429242  | 0.237467  | 0.248382  |
| 8  | Yu FT                   | 0.24154702 | 0.236115  | 0.24698   |
| 9  | Yu JX                   | 0.24156559 | 0.236133  | 0.246998  |
| 10 | Yu X                    | 0.24159686 | 0.236164  | 0.24703   |
| 11 | Yuan L                  | 0.24135433 | 0.235923  | 0.246786  |
| 12 | Yue HM                  | 0.24146326 | 0.236031  | 0.246896  |
| 13 | Zeng J                  | 0.2418316  | 0.236396  | 0.247267  |
| 14 | Zeng WZ                 | 0.24145465 | 0.236023  | 0.246886  |
| 15 | Zhai HL                 | 0.24143203 | 0.236001  | 0.246863  |
| 16 | Zhan H                  | 0.24142247 | 0.235991  | 0.246853  |
| 17 | Zhan T                  | 0.24208018 | 0.236641  | 0.24752   |
| 18 | Zhang JJ                | 0.24142049 | 0.23599   | 0.246851  |
| 19 | Zhang KY                | 0.24141598 | 0.235985  | 0.246847  |
| 20 | Zhang L                 | 0.24141848 | 0.235987  | 0.24685   |
| 21 | Zhang R                 | 0.24147427 | 0.236042  | 0.246907  |
| 22 | Zhang Y                 | 0.24142572 | 0.235994  | 0.246857  |
| 23 | Zhang YC                | 0.24141929 | 0.235988  | 0.246851  |
| 24 | Zhang YD                | 0.24139778 | 0.235967  | 0.246829  |
| 25 | Zhao L                  | 0.24140501 | 0.235974  | 0.246837  |
| 26 | Zhong ZM                | 0.24142331 | 0.235988  | 0.246858  |
| 27 | Zhou H                  | 0.24142781 | 0.235997  | 0.246859  |
| 28 | Zhou JL                 | 0.24161904 | 0.236185  | 0.247053  |
| 29 | Zhou R                  | 0.2414069  | 0.235975  | 0.246838  |
| 30 | Zhu JF                  | 0.24193569 | 0.236492  | 0.247379  |
| 31 | Zhu MR                  | 0.24145423 | 0.236022  | 0.246887  |
| 32 | Zhu SQ                  | 0.24211027 | 0.236671  | 0.24755   |
| 33 | <b>Combined</b>         | 0.24141874 | 0.235988  | 0.24685   |
| 34 |                         |            |           |           |
| 35 |                         |            |           |           |
| 36 |                         |            |           |           |
| 37 |                         |            |           |           |
| 38 |                         |            |           |           |
| 39 |                         |            |           |           |
| 40 |                         |            |           |           |
| 41 |                         |            |           |           |
| 42 |                         |            |           |           |
| 43 |                         |            |           |           |
| 44 |                         |            |           |           |
| 45 |                         |            |           |           |
| 46 |                         |            |           |           |
| 47 |                         |            |           |           |
| 48 |                         |            |           |           |
| 49 |                         |            |           |           |
| 50 |                         |            |           |           |
| 51 |                         |            |           |           |
| 52 |                         |            |           |           |
| 53 |                         |            |           |           |
| 54 |                         |            |           |           |
| 55 |                         |            |           |           |
| 56 |                         |            |           |           |
| 57 |                         |            |           |           |
| 58 |                         |            |           |           |
| 59 |                         |            |           |           |
| 60 |                         |            |           |           |



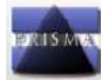

# PRISMA 2009 Checklist

| Section/topic                      | #  | Checklist item                                                                                                                                                                                                                                                                                              | Reported on page # |
|------------------------------------|----|-------------------------------------------------------------------------------------------------------------------------------------------------------------------------------------------------------------------------------------------------------------------------------------------------------------|--------------------|
| <b>TITLE</b>                       |    |                                                                                                                                                                                                                                                                                                             |                    |
| Title                              | 1  | Identify the report as a systematic review, meta-analysis, or both.                                                                                                                                                                                                                                         | 1                  |
| <b>ABSTRACT</b>                    |    |                                                                                                                                                                                                                                                                                                             |                    |
| Structured summary                 | 2  | Provide a structured summary including, as applicable: background; objectives; data sources; study eligibility criteria, participants, and interventions; study appraisal and synthesis methods; results; limitations; conclusions and implications of key findings; systematic review registration number. | 2                  |
| <b>INTRODUCTION</b>                |    |                                                                                                                                                                                                                                                                                                             |                    |
| Rationale                          | 3  | Describe the rationale for the review in the context of what is already known.                                                                                                                                                                                                                              | 5                  |
| Objectives                         | 4  | Provide an explicit statement of questions being addressed with reference to participants, interventions, comparisons, outcomes, and study design (PICOS).                                                                                                                                                  | 5-6                |
| <b>METHODS</b>                     |    |                                                                                                                                                                                                                                                                                                             |                    |
| Protocol and registration          | 5  | Indicate if a review protocol exists, if and where it can be accessed (e.g., Web address), and, if available, provide registration information including registration number.                                                                                                                               | /                  |
| Eligibility criteria               | 6  | Specify study characteristics (e.g., PICOS, length of follow-up) and report characteristics (e.g., years considered, language, publication status) used as criteria for eligibility, giving rationale.                                                                                                      | 7                  |
| Information sources                | 7  | Describe all information sources (e.g., databases with dates of coverage, contact with study authors to identify additional studies) in the search and date last searched.                                                                                                                                  | 6                  |
| Search                             | 8  | Present full electronic search strategy for at least one database, including any limits used, such that it could be repeated.                                                                                                                                                                               | 6                  |
| Study selection                    | 9  | State the process for selecting studies (i.e., screening, eligibility, included in systematic review, and, if applicable, included in the meta-analysis).                                                                                                                                                   | 7                  |
| Data collection process            | 10 | Describe method of data extraction from reports (e.g., piloted forms, independently, in duplicate) and any processes for obtaining and confirming data from investigators.                                                                                                                                  | 7-8                |
| Data items                         | 11 | List and define all variables for which data were sought (e.g., PICOS, funding sources) and any assumptions and simplifications made.                                                                                                                                                                       | 7-8                |
| Risk of bias in individual studies | 12 | Describe methods used for assessing risk of bias of individual studies (including specification of whether this was done at the study or outcome level), and how this information is to be used in any data synthesis.                                                                                      | 9                  |
| Summary measures                   | 13 | State the principal summary measures (e.g., risk ratio, difference in means).                                                                                                                                                                                                                               | 9                  |
| Synthesis of results               | 14 | Describe the methods of handling data and combining results of studies, if done, including measures of consistency (e.g., I <sup>2</sup> ) for each meta-analysis.                                                                                                                                          | 9                  |



# PRISMA 2009 Checklist

Page 1 of 2

| Section/topic                 | #  | Checklist item                                                                                                                                                                                           | Reported on page # |
|-------------------------------|----|----------------------------------------------------------------------------------------------------------------------------------------------------------------------------------------------------------|--------------------|
| Risk of bias across studies   | 15 | Specify any assessment of risk of bias that may affect the cumulative evidence (e.g., publication bias, selective reporting within studies).                                                             | 9                  |
| Additional analyses           | 16 | Describe methods of additional analyses (e.g., sensitivity or subgroup analyses, meta-regression), if done, indicating which were pre-specified.                                                         | 9                  |
| <b>RESULTS</b>                |    |                                                                                                                                                                                                          |                    |
| Study selection               | 17 | Give numbers of studies screened, assessed for eligibility, and included in the review, with reasons for exclusions at each stage, ideally with a flow diagram.                                          | 9-10               |
| Study characteristics         | 18 | For each study, present characteristics for which data were extracted (e.g., study size, PICOS, follow-up period) and provide the citations.                                                             | 10                 |
| Risk of bias within studies   | 19 | Present data on risk of bias of each study and, if available, any outcome level assessment (see item 12).                                                                                                | 12                 |
| Results of individual studies | 20 | For all outcomes considered (benefits or harms), present, for each study: (a) simple summary data for each intervention group (b) effect estimates and confidence intervals, ideally with a forest plot. | 10-11              |
| Synthesis of results          | 21 | Present results of each meta-analysis done, including confidence intervals and measures of consistency.                                                                                                  | 10-12              |
| Risk of bias across studies   | 22 | Present results of any assessment of risk of bias across studies (see Item 15).                                                                                                                          | 12                 |
| Additional analysis           | 23 | Give results of additional analyses, if done (e.g., sensitivity or subgroup analyses, meta-regression [see Item 16]).                                                                                    | 11-12              |
| <b>DISCUSSION</b>             |    |                                                                                                                                                                                                          |                    |
| Summary of evidence           | 24 | Summarize the main findings including the strength of evidence for each main outcome; consider their relevance to key groups (e.g., healthcare providers, users, and policy makers).                     | 12                 |
| Limitations                   | 25 | Discuss limitations at study and outcome level (e.g., risk of bias), and at review-level (e.g., incomplete retrieval of identified research, reporting bias).                                            | 15-16              |
| Conclusions                   | 26 | Provide a general interpretation of the results in the context of other evidence, and implications for future research.                                                                                  | 16                 |
| <b>FUNDING</b>                |    |                                                                                                                                                                                                          |                    |
| Funding                       | 27 | Describe sources of funding for the systematic review and other support (e.g., supply of data); role of funders for the systematic review.                                                               | 17                 |

From: Moher D, Liberati A, Tetzlaff J, Altman DG, The PRISMA Group (2009). Preferred Reporting Items for Systematic Reviews and Meta-Analyses: The PRISMA Statement. PLoS Med 6(7): e1000097. doi:10.1371/journal.pmed1000097

For more information, visit: [www.prisma-statement.org](http://www.prisma-statement.org).

Page 2 of 2

For peer review only - <http://bmjopen.bmj.com/site/about/guidelines.xhtml>

# BMJ Open

**Rate of asymptomatic COVID-19 among ascertained infections in different region and population groups in 2020: A systematic review and meta-analysis including 130,123 infections from 241 studies**

|                                 |                                                                                                                                                                                                                                                                                                                                                                                                                                                                                                                                                                |
|---------------------------------|----------------------------------------------------------------------------------------------------------------------------------------------------------------------------------------------------------------------------------------------------------------------------------------------------------------------------------------------------------------------------------------------------------------------------------------------------------------------------------------------------------------------------------------------------------------|
| Journal:                        | <i>BMJ Open</i>                                                                                                                                                                                                                                                                                                                                                                                                                                                                                                                                                |
| Manuscript ID                   | bmjopen-2021-049752.R2                                                                                                                                                                                                                                                                                                                                                                                                                                                                                                                                         |
| Article Type:                   | Original research                                                                                                                                                                                                                                                                                                                                                                                                                                                                                                                                              |
| Date Submitted by the Author:   | 03-Sep-2021                                                                                                                                                                                                                                                                                                                                                                                                                                                                                                                                                    |
| Complete List of Authors:       | Chen, Xiao; Zhejiang University<br>Huang, Ziyue; Mianyang Maternal and Child Health Care Hospital, Mianyang, China<br>Wang, Jingxuan; The Chinese University of Hong Kong<br>Zhao, Shi; The Chinese University of Hong Kong; The Chinese University of Hong Kong<br>Wong, Martin Chi-Sang; The Chinese University of Hong Kong<br>Chong, Ka; The Chinese University of Hong Kong; The Chinese University of Hong Kong<br>He, Daihai; Hong Kong Polytechnic University, Department of Applied Mathematics<br>Li, Jinhui; The Chinese University of Hong Kong, ; |
| <b>Primary Subject Heading</b>: | Public health                                                                                                                                                                                                                                                                                                                                                                                                                                                                                                                                                  |
| Secondary Subject Heading:      | Infectious diseases, Epidemiology                                                                                                                                                                                                                                                                                                                                                                                                                                                                                                                              |
| Keywords:                       | COVID-19, INFECTIOUS DISEASES, EPIDEMIOLOGY, PUBLIC HEALTH                                                                                                                                                                                                                                                                                                                                                                                                                                                                                                     |
|                                 |                                                                                                                                                                                                                                                                                                                                                                                                                                                                                                                                                                |

SCHOLARONE™  
Manuscripts



I, the Submitting Author has the right to grant and does grant on behalf of all authors of the Work (as defined in the below author licence), an exclusive licence and/or a non-exclusive licence for contributions from authors who are: i) UK Crown employees; ii) where BMJ has agreed a CC-BY licence shall apply, and/or iii) in accordance with the terms applicable for US Federal Government officers or employees acting as part of their official duties; on a worldwide, perpetual, irrevocable, royalty-free basis to BMJ Publishing Group Ltd ("BMJ") its licensees and where the relevant Journal is co-owned by BMJ to the co-owners of the Journal, to publish the Work in this journal and any other BMJ products and to exploit all rights, as set out in our [licence](#).

The Submitting Author accepts and understands that any supply made under these terms is made by BMJ to the Submitting Author unless you are acting as an employee on behalf of your employer or a postgraduate student of an affiliated institution which is paying any applicable article publishing charge ("APC") for Open Access articles. Where the Submitting Author wishes to make the Work available on an Open Access basis (and intends to pay the relevant APC), the terms of reuse of such Open Access shall be governed by a Creative Commons licence – details of these licences and which [Creative Commons](#) licence will apply to this Work are set out in our licence referred to above.

Other than as permitted in any relevant BMJ Author's Self Archiving Policies, I confirm this Work has not been accepted for publication elsewhere, is not being considered for publication elsewhere and does not duplicate material already published. I confirm all authors consent to publication of this Work and authorise the granting of this licence.

1 **Rate of asymptomatic COVID-19 among ascertained infections in**  
2 **different region and population groups in 2020: A systematic review**  
3 **and meta-analysis including 130,123 infections from 241 studies**

4

5 Xiao Chen<sup>a#</sup>, Ziyue Huang<sup>b#</sup>, Jingxuan Wang<sup>c##</sup>, Shi Zhao<sup>c,d</sup>, Martin Chi Sang Wong<sup>c</sup>,  
6 Marc Ka Chun Chong<sup>c,d,e</sup>, Daihai He<sup>f</sup>, and Jinhui Li<sup>c\*</sup>

7

8

9 **Affiliations:**

10 <sup>a</sup> School of Public Health, Zhejiang University, Zhejiang, China

11 <sup>b</sup> Mianyang Maternal and Child Health Care Hospital, Sichuan, China

12 <sup>c</sup> JC School of Public Health and Primary Care, The Chinese University of Hong Kong,  
13 Hong Kong SAR, China

14 <sup>d</sup> Shenzhen Research Institute, The Chinese University of Hong Kong, Shenzhen, China

15 <sup>e</sup> Centre for Health System and Policy Research, Faculty of Medicine, CUHK

16 <sup>f</sup> Department of Applied Mathematics, Hong Kong Polytechnic University, Hong Kong  
17 SAR, China

18

19 Authors' contact:

20 Xiao Chen: chenxiao9410@zju.edu.cn

21 Ziyue Huang: hzy950822@163.com

22 Jingxuan Wang: jxwang@link.cuhk.edu.hk

23 Shi Zhao: zhaoshi.cmsa@gmail.com

1  
2  
3 24 Martin Chi Sang Wong: [wong\\_martin@cuhk.edu.hk](mailto:wong_martin@cuhk.edu.hk)  
4

5 25 Marc Ka Chun Chong: [marc@cuhk.edu.hk](mailto:marc@cuhk.edu.hk)  
6

7 26 Daihai He: [daihai.he@polyu.edu.hk](mailto:daihai.he@polyu.edu.hk)  
8

9 27 Jinhui Li: [clairehh4588@gmail.com](mailto:clairehh4588@gmail.com)  
10

11 28 # They contributed equally to this work.  
12

13  
14  
15 29

16  
17 30 \* correspondence to: Jinhui Li, JC School of Public Health and Primary Care, The  
18 Chinese University of Hong Kong, Hong Kong SAR, China, Email:  
19 [clairehh4588@gmail.com](mailto:clairehh4588@gmail.com); or Jingxuan Wang, JC School of Public Health and Primary  
20 Care, The Chinese University of Hong Kong, Hong Kong SAR, China, Email:  
21 [jxwang@link.cuhk.edu.hk](mailto:jxwang@link.cuhk.edu.hk).  
22  
23  
24  
25

## 26 35 **Abstract**

27  
28  
29 36 *Introduction:* Asymptomatic infection of SARS-CoV-2 may lead to silent community  
30 transmission and compromise pandemic control measures of COVID-19. We aimed to  
31 estimate the rate of asymptomatic COVID-19 infection from published studies, and  
32 compare this rate among different region and patient groups.  
33  
34  
35

36 40

37  
38  
39 41 *Methods:* This systematic review and meta-analysis was conducted according to the  
40 standards strictly following the ‘*Preferred Reporting Items for Systematic reviews and*  
41 *Meta-Analyses*’ (PRISMA) guideline. The electronic databases including Medline,  
42 Embase, PubMed, and three Chinese electronic databases (The Chinese National  
43 Knowledge Infrastructure (CNKI), WanFang Data, and VIP) from 1 November 2019  
44 to 31 December 2020 were searched. Original studies with sample size (or number of  
45 subjects) not less than 5 were included. Subgroup analyses were conducted according  
46 to different study types, study periods, geographical regions, and patients’  
47 demographics. The STATA command ‘*Metaprop*’ was implemented to conduct meta-  
48 analysis for the pooled rate estimates of asymptomatic infections with exact binomial  
49 and score test-based 95% confidence intervals (CIs).  
50  
51  
52

53  
54  
55  
56 52  
57

1  
2  
3  
4 53 *Results:* A total of 130,123 ascertained COVID-19 infections in 241 studies were  
5 54 included in the meta-analysis, including 31,411 asymptomatic infections. The overall  
6 55 rate of asymptomatic infection was 23.6% (18.5%-29.1%) and 21.7% (16.8%-27.0%),  
7 56 before and after excluding pre-symptomatic cases, respectively. Subgroup analysis  
8 57 showed that the rate was significantly higher in pregnant women (48.8%, 28.9%-  
9 58 68.9%), children (32.1%, 24.4%-40.5%), and studies reporting screening programmes  
10 59 (36.0%, 24.6%-48.1%) conducted on or after 01 March 2020 (42.5%, 33.4%-51.9%).  
11 60 In terms of geographical regions, the rate was the highest in Africa (64.3%, 56.7%-  
12 61 71.6%), followed by America (40.0%, 27.4%-53.3%), Europe (28.1%, 19.0%-38.1%),  
13 62 and Asia (18.1%, 13.2%-23.5%).  
14  
15  
16  
17  
18  
19

20 63

21  
22 64 *Conclusion:* One-fifth of the COVID-19 infection is asymptomatic throughout the  
23 65 infection course. High proportion of asymptomatic infection were observed in some  
24 66 patient groups and regions. Public health policies targeting these high-risk groups may  
25 67 be recommended to achieve early identification and more stringent containment of the  
26 68 pandemic.  
27  
28  
29

30 69

31  
32  
33 70 (300 words)  
34

35 71 **Keywords:** COVID-19; SARS-CoV-2; asymptomatic infection; asymptomatic ratio;  
36 72 meta-analysis.  
37  
38  
39

40 73  
41  
42  
43  
44  
45  
46  
47  
48  
49  
50  
51  
52  
53  
54  
55  
56  
57  
58  
59  
60

1  
2  
3  
4 **74 Article Summary**

5  
6  
7 **75 Strengths and limitations of this study**

- 8  
9  
10 76 1. The comprehensive systematic literature search included a greater number of  
11 77 studies which reported varied asymptomatic infection rate.  
12  
13 78 2. Several subgroup analyses were conducted by considering different aspects of the  
14 79 study design.  
15  
16 80 3. Heterogeneity in the asymptomatic infection rate shall be noted.  
17  
18 81 4. Cross-sectional design of most reviewed studies may misclassify 'pre-symptomatic'  
19 82 as 'symptomatic' infections.  
20  
21  
22  
23  
24  
25  
26  
27  
28  
29  
30  
31  
32  
33  
34  
35  
36  
37  
38  
39  
40  
41  
42  
43  
44  
45  
46  
47  
48  
49  
50  
51  
52  
53  
54  
55  
56  
57  
58  
59  
60

83



## 84 Introduction

85 In 2019, a cluster of severe pneumonia cases of unknown type were reported in Wuhan,  
86 China (1). Later coined as the coronavirus disease 2019 (COVID-19), it rapidly resulted  
87 in large-scale outbreaks across many regions. On 30 January 2020, the World Health  
88 Organization (WHO) declared the COVID-19 as a public health emergency of  
89 international concern (2), and further defined it as a pandemic on 11 March 2020. As  
90 of 2 September 2020, a cumulative total of 25,937,361 COVID-19 cases have been  
91 confirmed globally, with 861,910 associated deaths.

92

93 The pathogen of COVID-19, i.e., severe acute respiratory syndrome coronavirus 2  
94 (SARS-CoV-2), is highly contagious, and could be transmitted from human to human  
95 (1, 3). The viral load in an asymptomatic patient has been found to be similar to that in  
96 symptomatic patients in a study of nine patients (4), and this observation was later  
97 confirmed in a study involving large samples (5). The early peaking of SARS-CoV-2  
98 viral load during the pre-symptomatic phase may cause silent community outbreaks (6).  
99 Further investigations also found that the asymptomatic infections may carry SARS-  
100 CoV-2 for more than 1 month, indicating the long-lasting risk of secondary infection  
101 (7-11).

102

103 Determining the rate of asymptomatic infection is important as it may deepen the  
104 understanding of the real reproductive number ( $R_0$ ), as well as the true incidence and  
105 mortality rate of COVID-19. The rate may also function as an essential epidemiological  
106 parameter to inform disease combating policies, including the density and range of  
107 screening, patient isolation as well as early intervention (12). Nevertheless, the  
108 significance of the invisibly infected person as the source of infection depends on its  
109 distribution in the population, and the amount and duration of the virus excreted (13).

1  
2  
3  
4 110 The reported proportions of asymptomatic individuals in existing literature varied a lot  
5  
6 111 (12), depending on their research settings (e.g. geographical region, screening vs. non-  
7  
8 112 screening studies), demographic characteristics (e.g. age groups, pregnant women,  
9  
10 113 children), and other latent factors. The present study performed a systematic review and  
11  
12 114 meta-analysis to estimate the asymptomatic infection rate based on published studies,  
13  
14 115 and compare the rate among different patient groups as well as study settings.

15  
16 116

## 117 **Methods**

### 118 *Searching strategy*

119 This systematic review and meta-analysis was conducted according to the standards  
120 strictly following the ‘*Preferred Reporting Items for Systematic reviews and Meta-*  
121 *Analyses*’ (PRISMA) guideline (14). XC and ZH searched the Medline, Embase,  
122 PubMed, and three most commonly-used Chinese electronic databases (the Chinese  
123 National Knowledge Infrastructure [CNKI], WanFang Data, and VIP) from 1  
124 November 2019 to 31 December 2020. CNKI, WanFang Data, and VIP are affiliates of  
125 the Chinese Ministry of Science & Technology that providing access to peer reviewed,  
126 continuously updated research journal articles in Chinese. The search string related to  
127 “COVID-19” AND “asymptomatic” was systematically developed in PubMed with the  
128 help of its MeSH terms, and was applied to all databases after discussing with an  
129 experienced Librarian (Maggie Choi). The search fields of “Text Word” was applied  
130 to ensure the best possible search evidence (**Supplementary Table 1**). No filters or  
131 limitations were applied to retrieve the best possible result and to avoid excluding pre-  
132 indexed materials. Meanwhile, highly relevant references were also searched (by XC  
133 and ZH) by reviewing the reference list of the included articles. Two reviewers (XC  
134 and ZH) determined the eligible studies independently. Consensus was reached by  
135 referral to a third reviewer (JW) when there was disagreement. All manuscripts were

1  
2  
3  
4 136 imported into the Endnote software (version X8, Thomson Reuters, Carlsbad,  
5 137 California) to store and manage the retrieved citations. Duplicate studies were removed.

6  
7  
8 138

9  
10  
11 139 ***Asymptomatic case and asymptomatic ratio***

12  
13  
14 140 Several similar definitions of 'asymptomatic case' were noted in previous studies (15).  
15  
16 141 We followed the official definition from the State Council of China and the World  
17  
18 142 Health Organization (WHO) (16, 17), and defined 'asymptomatic case' as individuals  
19  
20 143 who 1) have no clinical manifestations of COVID-19, such as fever, cough, sore throat,  
21  
22 144 and other self-perceived or clinically identifiable symptoms and signs; 2) have positive  
23  
24 145 result of SARS-CoV-2 pathogen test; and 3) does not develop symptoms until the end  
25  
26 146 of hospital admission or follow-up observations. Asymptomatic COVID-19 infection  
27  
28 147 rate, or asymptomatic ratio, is calculated as the proportion of asymptomatic cases  
29  
30 148 among all COVID-19 infections.

31  
32 149

33  
34  
35 150 ***Literature screening and selection criteria***

36  
37  
38 151 All studies were screened by title and abstract first, followed by full texts if the study  
39  
40 152 meets the inclusion criteria, which consist of: (1) the studying subjects were diagnosed  
41  
42 153 with SARS-CoV-2 infection; (2) the study was designed as an observational study; and  
43  
44 154 (3) the numbers of asymptomatic and symptomatic COVID-19 infections were  
45  
46 155 explicitly and exactly reported.

47  
48  
49 156

50  
51 157 The literature screening was conducted without language or region restriction. The  
52  
53 158 exclusion criteria are as follows. They included (1) study that included patients without  
54  
55 159 virological evidence of SARS-CoV-2 infection; exclusion criterion (2) study which did  
56  
57 160 not investigate the distribution of asymptomatic COVID-19 infections among all

1  
2  
3  
4 161 subjects; (3) study that is not classified as original research, such as reviews, comments,  
5  
6 162 case report; and (4) study has an overall sample size of less than 5.  
7

8  
9 163

10  
11 164 For the same group of subjects been reported by different articles, only articles with the  
12  
13 165 most updated and detailed information were included for further analysis.  
14

15  
16 166

17  
18  
19 167 ***Data extraction and subgrouping schemes***

20  
21 168 For eligible articles, two types of the information were extracted by the two reviewers  
22  
23 169 (XC and ZH) independently. For each study, we include two types of information: (1)  
24  
25 170 the basic information of the individual studies that contains the name of the first author,  
26  
27 171 investigation period, geographical region, and the study setting (screening and non-  
28  
29 172 screening); and (2) the study settings, characteristics of subjects, sample size, and the  
30  
31 173 number of COVID-19 infections (total infections, pre-symptomatic infections, and  
32  
33 174 asymptomatic infections).  
34

35  
36 175 To ensure the accuracy of data, cross-checking was conducted after extraction of the  
37  
38 176 preliminary information. Disagreements were resolved through consensus or by referral  
39  
40 177 to the third reviewer (JW).  
41

42  
43 178

44  
45 179 To explore the source of heterogeneity among the included studies, several subgroup  
46  
47 180 analyses were performed according to the study design and characteristics of subjects  
48  
49 181 in each study. First, we identified three groups based on the subjects' demographical  
50  
51 182 features. They included 'children' groups consisting of subjects less than 18 years old;  
52  
53 183 'pregnant women' groups involving expectant mothers as subjects; and the 'general  
54  
55 184 population' group. Second, three age groups were identified according to the subjects'  
56  
57 185 mean or median age:  $\leq 18$ , from 19 to 45, and  $> 45$  years, respectively. The selection  
58

1  
2  
3  
4 186 of mean or median age followed the statistics reported in each study. Third, studies  
5 187 were categorized into ‘screening’ or ‘non-screening’ types by referring to the positive  
6 188 rate of SARS-CoV-2 pathogen test among included subjects. In the screening studies,  
7 189 the positive rate is less than 100%; while for non-screening studies, all subjects were  
8 190 tested positive. Forth, we separated studies based on subjects from different  
9 191 geographical regions including China, Asia (excluding China), the US and Europe. Last,  
10 192 subgroup analysis was performed by study period, during which the subjects were  
11 193 tested for COVID-19, including ‘before 01 March 2020’ or ‘01 March 2020 and  
12 194 afterwards’.

13  
14  
15  
16  
17  
18  
19  
20  
21  
22 195

### 23 24 25 196 ***Quality assessment***

26  
27 197 The quality of each included study was assessed by two researchers (XC and ZH)  
28 198 independently using the quality of cross-sectional studies (AXIS) scale (18). There are  
29 199 five components including 20 questions in the AXIS scale. Seven questions measure  
30 200 the quality of reporting; another seven questions measure the quality of study design,  
31 201 and six questions measure the possible introduction of biases in each study.

32  
33  
34  
35  
36  
37  
38 202

### 39 40 41 203 ***Statistical analysis***

42  
43 204 Accounting for all included studies, the pooled estimates of the asymptomatic rates  
44 205 were generated with exact binomial-distributed likelihood framework and score test-  
45 206 based 95% confidence intervals (CIs) (1). The STATA command “*metaprop*” was  
46 207 adopted to conduct meta-analysis. Heterogeneity across the studies was examined by  
47 208 the  $I^2$  statistic, measuring the proportion of total variation contributed by between-study  
48 209 variation. The  $I^2$  values < 25%, ranging from 25% to 75%, and > 75% correspond to  
49 210 the thresholds for three ordinal levels of heterogeneity including low, moderate, and  
50 211 high, respectively (19).

212

213 Univariate and multivariate meta-regression analysis was performed to identify any  
214 potential effects of modifiers or confounders on the estimated rate. We examined the  
215 effects of the covariates including study population, age-specific proportion,  
216 screening/non-screening study, geographical region, and time trend in multivariate  
217 analysis. Sensitivity analysis was conducted by omitting one study at a time, generating  
218 the pooled estimates and comparing with the original estimates. Potential publication  
219 bias was examined by Egger's test and visualized using a funnel plot. If the tests  
220 indicated potential publication bias, the Trim and Fill's method, which is based on a  
221 modified funnel plot, would be adopted to adjust the small-study effect (20).

222

223 All analyses were performed using STATA statistical software (version 14.0, Stata,  
224 College Station, Texas, USA). The figures were generated using R software (version  
225 3.6.3) with the *'forestplot'* package.

226

## 227 **Results**

### 228 *Characteristics of studies and subjects*

229 In total, 9,798 unique citations were identified in different databases by the literature  
230 search (**Figure 1**). We retrieved 661 full-text articles assessed for eligibility after 9,247  
231 citations were excluded during title or abstract screening with pre-determined criteria.  
232 Finally, there were 241 studies in 240 articles included in the meta-analysis, among  
233 which 3 studies were additional records identified through reference lists.

234

1  
2  
3  
4 235 The basic characteristics of the included studies are shown in **Supplementary Table**  
5  
6 236 **2**. These characteristics include: cities, countries and study periods in which the  
7  
8 237 ascertained COVID-19 infections were recruited; the number of test-positive and  
9  
10 238 asymptomatic infections; the number of pre-symptomatic infection in patients if  
11  
12 239 available; and demographics of each patient. Approximately 72.9% (175 out of 241) of  
13  
14 240 all included studies were conducted in Asia, 11.7% in the Europe, and 10.42% in  
15  
16 241 America. In terms of study populations, 80.5% were performed in the general adults,  
17  
18 242 12.4% in children and 7.1% in pregnant women, respectively.

19  
20 243

21  
22  
23 244 Quality scores of AXIS for the included studies ranged between 11 and 19 points, with  
24  
25 245 153 studies meeting the criteria of having high quality ( $\geq 16$  points). Overall, 97.9%  
26  
27 246 (235 out of 240) of all studies met the criteria for both reporting aims/objectives and  
28  
29 247 quality design, and the risk factors and outcome variables were appropriate for the  
30  
31 248 studies. In all studies, the methods were clearly defined so that those studies could be  
32  
33 249 repeated, and the presentation of results met the analysis descriptions in the methods  
34  
35 250 with internal consistency (**Supplementary Table 3**).

36  
37 251

### 38 39 40 252 *Asymptomatic ratio estimates*

41  
42  
43 253 A total of 130,123 ascertained COVID-19 infections from 241 studies were finally  
44  
45 254 included in the meta-analysis (**Figure 2**), including 31,411 asymptomatic infections at  
46  
47 255 the time of diagnosis. The rate of asymptomatic infections varied from 0.1% in the  
48  
49 256 general adults in Wuhan, China (21), to 95.6% in the pregnant women in Peru (22). The  
50  
51 257 overall rate of asymptomatic infections was estimated at 23.6% (18.5%-29.1%). The  
52  
53 258  $I^2$  equaled to 99.7%, indicating a high heterogeneity among the studies. Of the  
54  
55 259 31,411 asymptomatic infections, 448 (1.4%) developed symptoms after admission.

1  
2  
3  
4 260 After excluding these pre-symptomatic observations, the pooled rate was 21.7%  
5 261 (16.8%-27.0%) at an  $I^2$  of 99.7%.

6  
7  
8 262  
9

10  
11 263 In subgroup analysis, we found that pregnant women (48.8%, 28.9%-68.9%;  $I^2 =$   
12 264 96.9%) had a significantly higher asymptomatic infection rate than children  
13 265 (32.1%,24.2%-40.5%;  $I^2 = 94.4%$ ), whereas the general non-pregnant adults had the  
14 266 lowest asymptomatic rate (20.4%, 15.0%-26.3%;  $I^2 = 99.8%$ ). Regarding age-specific  
15 267 proportion, patients aged  $\leq 18$  years (31.1%, 23.5%-39.2%;  $I^2 = 94.4%$ ) had a  
16 268 significantly higher prevalence of asymptomatic cases than adults aged 19-45 years  
17 269 (26.7%, 19.1%-34.9%;  $I^2 = 99.7%$ ) or  $> 45$  years (15.3%, 10.7%-20.6%;  $I^2 = 97.1%$ ).

18  
19  
20  
21  
22  
23  
24  
25  
26 270

27  
28 271 The asymptomatic infection rate was 36.0% (24.6%-48.1%;  $I^2 = 99.8%$ ) among studies  
29 272 for screening settings, which is almost twice of that among studies for non-screening  
30 273 settings (19.4%, 14.3%-24.9%;  $I^2 = 99.6%$ ). Significantly different asymptomatic rates  
31 274 were observed in different geographical regions ( $p$ -value  $< 0.001$ ) - the rate was highest  
32 275 in Africa (64.3%, 56.7%-71.6%;  $I^2 = 96.8%$ ), followed by America (40.0%, 27.4%-  
33 276 53.3%;  $I^2 = 99.6%$ ), and Europe (28.1%, 19.0%-38.1%;  $I^2 = 98.5%$ ). Asia was  
34 277 estimated to have the lowest rate of asymptomatic infection (18.1%, 13.2%-23.5%;  $I^2 =$   
35 278 99.5%). For subgroup analysis by time period, we noted that studies conducted before  
36 279 01 March 2020 reported a pooled asymptomatic infection rate of 13.3% (9.8%-17.1%;  
37 280  $I^2 = 94.2%$ ), while the rate increased sharply to 42.5% (33.4%-51.9%;  
38 281  $I^2 = 99.6%$ ) among studies conducted after 01 March 2020.

39  
40  
41  
42  
43  
44  
45  
46  
47  
48  
49  
50  
51 282

52  
53 283 All subgroup analysis results were shown in **Figure 3**.

54  
55  
56 284  
57  
58  
59  
60



1  
2  
3  
4 285 We performed both univariate and multivariate meta-regression analysis to investigate  
5  
6 286 study-level factors that may contribute to the heterogeneity among studies and might  
7  
8 287 have influenced our estimations of the asymptomatic infection rate. The results of  
9  
10 288 univariate regression analysis (**Table 1**) demonstrated several significant sources of  
11  
12 289 heterogeneity in the estimated asymptomatic infection rate - studies focused on subjects  
13  
14 290 aging >45 years old ( $p$ -value = 0.015) and were conducted out of Africa ( $p$ -value  $\leq$   
15  
16 291 0.001) are significantly associated with a lower ratio of asymptomatic infection;  
17  
18 292 whereas those using a non-screening study design ( $p$ -value < 0.001), and conducted on  
19  
20 293 or after 01 March 2020 ( $p$ -value < 0.001) tend to report a higher ratio of asymptomatic  
21  
22 294 infection. A screening study design ( $p$ -value = 0.031), geographical region ( $p$ -value <  
23  
24 295 0.001) and time trend ( $p$ -value < 0.001) remained the significant sources of  
25  
26 296 heterogeneity in the multivariate regression analysis.

27  
28 297

29  
30 298 We found no evidence of publication bias among studies by Egger's test with  $p$ -value  
31  
32 299 = 0.414. Sensitivity analysis showed that it was unlikely that any individual study  
33  
34 300 significantly influenced the pooled estimates, demonstrating the robustness and  
35  
36 301 reliability of our estimates (**Supplementary Table 4**).

37  
38  
39 302

## 40 41 42 303 **Discussion**

43  
44  
45 304 Our meta-analysis of 130,123 infections in 241 studies performed in 36 countries  
46  
47 305 provides an up-to-date as well as comprehensive overview of asymptomatic infection  
48  
49 306 rate of COVID-19. The estimated rate in our study is 23.6% and 21.7%, before and  
50  
51 307 after excluding pre-symptomatic cases, respectively. There are three key findings in the  
52  
53 308 subgroup analysis (23). First, African studies reported the highest asymptomatic  
54  
55 309 infection rate, while Asian studies reported the lowest. Second, the proportion of  
56  
57 310 asymptomatic carriers was nearly doubled in screening studies than that in non-

1  
2  
3  
4 311 screening studies. Third, asymptomatic infection rate was more than two times higher  
5 312 in studies conducted in or after 01 March 2020 than those conducted beforehand.

6  
7  
8 313  
9

10  
11 314 Our estimation is higher than some existing meta-analysis which reported a ratio  
12  
13 315 between 15.6% to 20% (24, 25). One possible explanation is that the included studies  
14  
15 316 in previous meta-analysis were dominated by that conducted during the early course of  
16  
17 317 the pandemic and in China or the US, where the asymptomatic ratio is lower than other  
18  
19 318 regions. However, our study included more than 200 articles, resulting in a more precise  
20  
21 319 estimation with significantly narrower confidence interval. With a much larger dataset,  
22  
23 320 we conducted more subgroup analysis which resulted in more implications.

24  
25  
26 321  
27

28 322 In the subgroup analysis, we noted a large variety of asymptomatic rates among  
29  
30 323 different populations. For instance, children and adults aged  $\leq 45$  years old tended to  
31  
32 324 have a significantly higher rate. The inverse correlation between age and symptom  
33  
34 325 severity has also been reported and discussed by a few studies, and the prevalence of  
35  
36 326 chronic diseases was considered as the risk factors of symptomatic infection (23, 26,  
37  
38 327 27). Nevertheless, a multi-center study in China noted that more than half of the  
39  
40 328 asymptomatic children had lung injuries, although the injuries were usually less severe  
41  
42 329 than that among the adults. Infection control measures may be targeted on the early  
43  
44 330 detection and isolation of asymptomatic youth, as the young asymptomatic carriers are  
45  
46 331 of higher probability to bring in community transmission due to their more socially  
47  
48 332 active lifestyle habits with more frequent travelling than people in other age groups (26).

49  
50  
51 333  
52

53 334 We also noted that the asymptomatic infection rate for pregnant women (48.8%) is  
54  
55 335 more than two times that for the general adults (20.4%). Previous study suggested  
56  
57 336 cytotoxic cells may be poised to control virus load, and hence affect the disease severity

1  
2  
3  
4 337 during pregnancy (28). Case reports from the New York hospital reported a similarly  
5  
6 338 high rate (14 women, 32.6%) at presentation, yet 71.4% (10 women) of the  
7  
8 339 asymptomatic mothers developed symptoms during their hospitalization and  
9  
10 340 postpartum course (29). Nevertheless, we noted that 15 out of our 17 included studies  
11  
12 341 on pregnant women are cross-sectional studies that in which the high proportion of  
13  
14 342 asymptomatic infections may include both pre-symptomatic and asymptomatic cases.  
15  
16 343 More follow-up studies among the pregnant women are needed before drawing further  
17  
18 344 conclusions. Undetected asymptomatic pregnant women may lead to more severe  
19  
20 345 consequences. Without early detection and proper preventive measures, the delivery of  
21  
22 346 asymptomatic patients brings extra risks to nosocomial infection, and may also result  
23  
24 347 in droplet transmission among the women, kids, as well as other family members (30).  
25  
26 348 Importantly, the data suggest that the severity and mortality risk of hospital  
27  
28 349 transmission may be greater than that of community-acquired COVID-19 (31).

29  
30 350

31  
32  
33 351 To our knowledge, this is the first meta-analysis that compared the asymptomatic  
34  
35 352 infection rate in different continents. Previous meta-analysis only concluded that  
36  
37 353 population in Asia may have a lower asymptomatic ratio, while did not explored the  
38  
39 354 differences among other continents (32). Our results also showed that estimated ratio  
40  
41 355 in Asia is the lowest among all continents. Possible explanations were summarized in  
42  
43 356 a published meta-analysis, from the perspectives of infection control policies and host  
44  
45 357 characteristics (32). Meanwhile, the rates in Africa (64.3%) were the highest among all  
46  
47 358 continents, although the limited number of subjects (20,271 COVID-19 infections) in  
48  
49 359 African studies reminded us to think twice before generalizing the results. The  
50  
51 360 phenomenon may be partly explained by a few factors in African patients, including  
52  
53 361 the generally younger age, the lower proportion of chronic disease patients and elderlies  
54  
55 362 living in nursing homes, and the higher serum Vitamin D levels due to rich sun exposure  
56  
57 363 (33). Despite the higher asymptomatic ratio, it is noted that Africa is the continent with

1  
2  
3  
4 364 the lowest RT-PCR testing rate as well as the lowest vaccination rate. The high  
5  
6 365 proportion of asymptomatic rate may further hinder the timely detection and control of  
7  
8 366 COVID-19 infections.  
9

10 367

11  
12  
13 368 We noted that the asymptomatic infection rate was nearly doubled in screening studies  
14  
15 369 than that in non-screening studies. One possible explanation is that people may get  
16  
17 370 tested for varied reasons associated with the social, cultural, and political factors in each  
18  
19 371 region. For instance, frontline health workers and people with a history of exposure  
20  
21 372 were in general more likely to be reported in screening programmes, while the samples  
22  
23 373 in non-screening studies were likely to be dominated by subjects having severe  
24  
25 374 symptoms requiring hospitalization (34). If we consider the rate as a constant, the higher  
26  
27 375 asymptomatic infection rate estimates were likely due to higher probabilities of  
28  
29 376 ascertaining asymptomatic COVID-19 infections in the community with screening  
30  
31 377 implemented. This implies the importance of mass screening in detecting the infections,  
32  
33 378 which is of importance in community infection control. Increasing the accessibility and  
34  
35 379 affordability of community testing could be an important surveillance strategy for early  
36  
37 380 containment of diagnosed cases (35).  
38

39 381

40  
41  
42 382 We also found that the pooled asymptomatic infection rate increased from 13.3% (95%  
43  
44 383 CI: 9.8%-17.1%) for studies conducted before 01 March 2020, to 42.5% (33.4%-51.9%)  
45  
46 384 for studies conducted on 01 March 2020 or afterwards, although the 95% CI is larger  
47  
48 385 in the latter time period. This timeline is highly consistent with a previous study using  
49  
50 386 the publicly released from the Centre for Health Protection in Hong Kong (36). The  
51  
52 387 increased rate may be due to overlooking of asymptomatic, especially pre-symptomatic  
53  
54 388 cases at the early stage of the pandemic, when medical resources were targeted to  
55  
56 389 patients with severe symptoms. Later, with increased public awareness and test  
57  
58  
59  
60

1  
2  
3  
4 390 accessibility, more COVID-19 infected individuals without symptoms were detected,  
5  
6 391 while more and more studies reported the proportion of asymptomatic patients. In this  
7  
8 392 context, future studies may explore whether the proportion of COVID-19 infections  
9  
10 393 with mild or no symptoms is increasing, especially when considering the SARS-CoV-  
11  
12 394 2 variant with D replaced by G at the 614-th codon in the Spike protein which  
13  
14 395 dominated the pandemic since late February 2020 (6, 37, 38).

15  
16 396

17  
18  
19 397 This study has limitations. First, our pooled asymptomatic infection rates were found  
20  
21 398 to have a high level of heterogeneity ( $I^2 = 96.2\%$ ). This could be attributed to the  
22  
23 399 difficulties in generating the exact number of infections and asymptomatic cases during  
24  
25 400 an outbreak. Although we conducted subgroup analysis and meta-regression to figure  
26  
27 401 out the source of heterogeneity, some unobserved factors which have not be included  
28  
29 402 in the original studies may lead to the high heterogeneity, such as changing pandemic  
30  
31 403 control measures in some countries; the diverse definition of asymptomatic infection,  
32  
33 404 varying practices of surveillance and ascertainment of asymptomatic infection; as well  
34  
35 405 as meteorological disparities across time and regions. Nevertheless, previous studies  
36  
37 406 indicated that any amount of heterogeneity is acceptable if both accurate data and  
38  
39 407 predefined eligibility criteria were provided (39, 40). Second, we followed the WHO  
40  
41 408 definition of COVID-19 infection and only included infections detected by RT-PCR,  
42  
43 409 while the availability of RT-PCR is restricted in many countries (41). Increasing  
44  
45 410 number of studies reported the results of antibody-based rapid diagnostic tests, yet they  
46  
47 411 were not included in our meta-analysis. Third, our meta-analysis focused on real-world  
48  
49 412 evidence and observational studies, in which subjects with more severe and easily  
50  
51 413 recognized symptoms are more likely to be selected. The collider bias caused by non-  
52  
53 414 representative sampling strategies (such as sampling conditional on testing and  
54  
55 415 prognosis conditional on hospitalization) in existing observational studies on COVID-  
56  
57 416 19 has been deeply discussed in (34). Forth, cross-sectional studies included in this

1  
2  
3  
4 417 review might mis-classified pre-symptomatic cases as ‘asymptomatic’, hence result in  
5  
6 418 a certain degree of overestimation on the asymptomatic infection rate. With additional  
7  
8 419 information of the exposure and reporting dates of each case, we remark our estimation  
9  
10 420 can be extended to a right censoring version to further address some potential bias in  
11  
12 421 the existing frameworks (12).

13  
14 422

## 17 423 **Conclusions**

20 424 We estimated the asymptomatic infection rate of 23.6%, which decreased to 21.7%  
21  
22 425 after excluding pre-symptomatic cases. Subgroup analysis indicates that pregnant  
23  
24 426 women, children, African residents, screening programmes, and studies conducted after  
25  
26 427 01 March 2020 had higher asymptomatic infection rates. Our findings provide further  
27  
28 428 insights on the distribution of asymptomatic COVID-19 infections in different groups  
29  
30 429 of individuals, which bear significance on public health policies that aim to achieve  
31  
32 430 early identification and more stringent containment of the pandemic.

33  
34  
35 431  
36  
37  
38  
39  
40  
41  
42  
43  
44  
45  
46  
47  
48  
49  
50  
51  
52  
53  
54  
55  
56  
57  
58  
59  
60

1  
2  
3 432 ***Declarations***

4  
5  
6 433 ***Patient and Public Involvement***

7  
8  
9 434 Not applicable.

10  
11 435 ***Ethics approval and consent to participate***

12  
13  
14 436 Not applicable.

15  
16  
17 437 ***Availability of materials***

18  
19  
20 438 All data relevant to the study are included in the article or uploaded as supplementary  
21  
22 439 information.

23  
24  
25 440 ***information*** ***Consent for publication***

26  
27 441 Not applicable.

28  
29  
30 442 ***Funding***

31  
32  
33 443 This study was funded by The Key Project of Medicine Discipline of Guangzhou  
34  
35 444 (2017–2019-07). DH was supported by General Research Fund (15205119) of  
36  
37 445 Research Grants Council of Hong Kong and Alibaba (China) Co. Ltd. Collaborative  
38  
39 446 Research grant.

40  
41 447 ***Acknowledgements***

42  
43  
44 448 We thank Ms. Maggie Choi, Librarian from Li Ping Library, The Chinese University  
45  
46 449 of Hong Kong, for her valuable help in developing our search strategy.

47  
48  
49 450 ***Disclaimer***

50  
51  
52 451 The funding agencies had no role in the design and conduct of the study; collection,  
53  
54 452 management, analysis, and interpretation of the data; preparation, review, or approval  
55  
56 453 of the manuscript; or decision to submit the manuscript for publication.

1  
2  
3  
4 454 ***Conflict of interests***  
5

6 455 DH received a grant from Alibaba (China) Co. Ltd., Collaborative Research grant.  
7

8 456 Other authors declared no conflict of interest.  
9

10  
11 457 ***Author's contributions***  
12

13  
14 458 XC and ZH designed the study and searched the literature. XC, ZH, and JW extracted  
15

16 459 the data and evaluated the quality. XC conducted the statistical analysis. XC, ZH, and  
17

18 460 JW wrote the full manuscript. SZ, MSCW, MKCC, DH, and JL provided critical  
19

20 461 revision of the manuscript for important intellectual content. All authors discussed the  
21

22 462 results, and approved the final version of the manuscript for publication.  
23

24  
25 463  
26  
27  
28  
29  
30  
31  
32  
33  
34  
35  
36  
37  
38  
39  
40  
41  
42  
43  
44  
45  
46  
47  
48  
49  
50  
51  
52  
53  
54  
55  
56  
57  
58  
59  
60



**References:**

1. Chan JF-W, Yuan S, Kok K-H, To KK-W, Chu H, Yang J, et al. A familial cluster of pneumonia associated with the 2019 novel coronavirus indicating person-to-person transmission: a study of a family cluster. *The lancet*. 2020;395(10223):514-23.
2. Team EE. Note from the editors: World Health Organization declares novel coronavirus (2019-nCoV) sixth public health emergency of international concern. *Eurosurveillance*. 2020;25(5):200131e.
3. Zhao S, Lin Q, Ran J, Musa SS, Yang G, Wang W, et al. Preliminary estimation of the basic reproduction number of novel coronavirus (2019-nCoV) in China, from 2019 to 2020: A data-driven analysis in the early phase of the outbreak. *International journal of infectious diseases*. 2020;92:214-7.
4. Zou L, Ruan F, Huang M, Liang L, Huang H, Hong Z, et al. SARS-CoV-2 viral load in upper respiratory specimens of infected patients. *New England Journal of Medicine*. 2020;382(12):1177-9.
5. Lee S, Kim T, Lee E, Lee C, Kim H, Rhee H, et al. Clinical course and molecular viral shedding among asymptomatic and symptomatic patients with SARS-CoV-2 infection in a community treatment center in the Republic of Korea. *JAMA internal medicine*. 2020;180(11):1447-52.
6. Chen X, Pan Z, Yue S, Yu F, Zhang J, Yang Y, et al. Disease severity dictates SARS-CoV-2-specific neutralizing antibody responses in COVID-19. *Signal transduction and targeted therapy*. 2020;5(1):180.
7. Bai Y, Yao L, Wei T, Tian F, Jin D-Y, Chen L, et al. Presumed asymptomatic carrier transmission of COVID-19. *Jama*. 2020;323(14):1406-7.
8. Hoehl S, Rabenau H, Berger A, Kortenbusch M, Cinatl J, Bojkova D, et al. Evidence of SARS-CoV-2 infection in returning travelers from Wuhan, China. *New England Journal of Medicine*. 2020;382(13):1278-80.
9. Pan Y, Yu X, Du X, Li Q, Li X, Qin T, et al. Epidemiological and clinical characteristics of 26 asymptomatic severe acute respiratory syndrome coronavirus 2 carriers. *The Journal of infectious diseases*. 2020;221(12):1940-7.
10. Lauer SA, Grantz KH, Bi Q, Jones FK, Zheng Q, Meredith HR, et al. The incubation period of coronavirus disease 2019 (COVID-19) from publicly reported confirmed cases: estimation and application. *Annals of internal medicine*. 2020;172(9):577-82.
11. Chen Y, Wang A, Yi B, Ding K, Wang H, Wang J, et al. Epidemiological characteristics of infection in COVID-19 close contacts in Ningbo city. *Zhonghua liu Xing Bing xue za zhi= Zhonghua*

- 1  
2  
3 494 Liuxingbingxue Zazhi. 2020;41(5):667-71.  
4  
5  
6 495 12. Mizumoto K, Kagaya K, Zarebski A, Chowell G. Estimating the asymptomatic proportion of  
7 496 coronavirus disease 2019 (COVID-19) cases on board the Diamond Princess cruise ship, Yokohama,  
8 497 Japan, 2020. Eurosurveillance. 2020;25(10):2000180.  
9  
10  
11 498 13. Gao W, LM L. Research progress on the incubation period of new coronavirus pneumonia or the  
12 499 transmission of recessive infections. Chinese Journal of Epidemiology. 2020;41 (4):485-8.  
13  
14  
15 500 14. Moher D, Liberati A, Tetzlaff J, Altman DG, Group P. Preferred reporting items for systematic  
16 501 reviews and meta-analyses: the PRISMA statement. PLoS medicine. 2009;6(7):e1000097.  
17  
18  
19 502 15. Commission SMh. The collection of outbreak situation reports of COVID-19 in shenzhen,  
20 503 Shenzhen Munciple health Commission 2020 [Available from: <http://wjw.sz.gov.cn/yqxx/>.  
21  
22  
23 504 16. TPsgoB M. Notice of the State Council on the Joint Prevention and Control Mechanism for the  
24 505 Prevention and Control of the Novel Coronavirus Infection and Pneumonia Epidemic on Issuing the  
25 506 Regulations for the Management of Asymptomatic Patients with the New Coronavirus 2020 [Available  
26 507 from: [http://www.beijing.gov.cn/zhengce/zhengcefagui/202004/t20200409\\_1798158.html](http://www.beijing.gov.cn/zhengce/zhengcefagui/202004/t20200409_1798158.html).  
27  
28  
29 508 17. Varghese GM, John R, Manesh A, Karthik R, Abraham O. Clinical management of COVID-19.  
30 509 The Indian Journal of Medical Research. 2020;151(5):401.  
31  
32  
33 510 18. Downes MJ, Brennan ML, Williams HC, Dean RS. Development of a critical appraisal tool to  
34 511 assess the quality of cross-sectional studies (AXIS). BMJ open. 2016;6(12):e011458.  
35  
36  
37 512 19. Marsh A, Eslick EM, Eslick GD. Does a diet low in FODMAPs reduce symptoms associated with  
38 513 functional gastrointestinal disorders? A comprehensive systematic review and meta-analysis. European  
39 514 journal of nutrition. 2016;55(3):897-906.  
40  
41  
42 515 20. Duval S, Tweedie R. Trim and fill: a simple funnel-plot-based method of testing and adjusting for  
43 516 publication bias in meta-analysis. Biometrics. 2000;56(2):455-63.  
44  
45  
46 517 21. Ji T, Chen H-L, Xu J, Wu L-N, Li J-J, Chen K, et al. Lockdown contained the spread of 2019 novel  
47 518 coronavirus disease in Huangshi city, China: Early epidemiological findings. Clinical Infectious Diseases.  
48 519 2020;71(6):1454-60.  
49  
50  
51 520 22. Grados IZ, Paredes RL, Benavides G. Characteristics of SARS-CoV-2 infection in pregnant and  
52 521 puerperal women at Callao national hospital, Peru.  
53  
54  
55 522 23. Interim Clinical Guidance for Management of Patients with Confirmed Coronavirus Disease  
56 523 (COVID-19). Centers for Disease Control and Prevention; 2020 [Available from:

- 1  
2  
3  
4 524 <https://www.cdc.gov/coronavirus/2019-ncov/hcp/clinical-guidance-management-patients.html>.
- 5  
6 525 24. Byambasuren O, Cardona M, Bell K, Clark J, McLaws M-L, Glasziou P. Estimating the extent of  
7 526 asymptomatic COVID-19 and its potential for community transmission: systematic review and meta-  
8 analysis. *Official Journal of the Association of Medical Microbiology and Infectious Disease Canada*.  
9 527 2020;5(4):223-34.
- 10 528  
11  
12 529 25. Cai J, Sun W, Huang J, Gamber M, Wu J, He G. Clinical features and the treatment of children with  
13 530 COVID-19: A case series from Wenzhou, China. *J Med Virol*. 2020;92(11):2403-5.
- 14  
15  
16 531 26. Zhang S, Xu Y, Li J, Wu K, Wang T, Su X, et al. Symptomless multi-variable apnea prediction  
17 532 index assesses adverse outcomes in patients with Corona Virus Disease 2019. *Sleep medicine*.  
18 533 2020;75:294-300.
- 19  
20  
21 534 27. Du W, Yu J, Wang H, Zhang X, Zhang S, Li Q, et al. Clinical characteristics of COVID-19 in  
22 535 children compared with adults in Shandong Province, China. *Infection*. 2020;48(3):445-52.
- 23  
24  
25 536 28. Edlow AG, Li JZ, Ai-ris YC, Atyeo C, James KE, Boatman AA, et al. Assessment of Maternal and  
26 537 Neonatal SARS-CoV-2 Viral Load, Transplacental Antibody Transfer, and Placental Pathology in  
27 538 Pregnancies During the COVID-19 Pandemic. *JAMA network open*. 2020;3(12):e2030455-e.
- 28  
29  
30  
31 539 29. Breslin N, Baptiste C, Gyamfi-Bannerman C, Miller R, Martinez R, Bernstein K, et al. Coronavirus  
32 540 disease 2019 infection among asymptomatic and symptomatic pregnant women: two weeks of confirmed  
33 541 presentations to an affiliated pair of New York City hospitals. *American journal of obstetrics &*  
34 542 *gynecology MFM*. 2020;2(2):100118.
- 35  
36  
37 543 30. Breslin N, Baptiste C, Gyamfi-Bannerman C, Miller R, Martinez R, Bernstein K, et al. Coronavirus  
38 544 disease 2019 infection among asymptomatic and symptomatic pregnant women: two weeks of confirmed  
39 545 presentations to an affiliated pair of New York City hospitals. *American journal of obstetrics &*  
40 546 *gynecology MFM*. 2020;2(2):100118.
- 41  
42  
43  
44 547 31. McMichael TM, Currie DW, Clark S, Pogosjans S, Kay M, Schwartz NG, et al. Epidemiology of  
45 548 Covid-19 in a long-term care facility in King County, Washington. *New England Journal of Medicine*.  
46 549 2020;382(21):2005-11.
- 47  
48  
49 550 32. Chen C, Zhu C, Yan D, Liu H, Li D, Zhou Y, et al. The epidemiological and radiographical  
50 551 characteristics of asymptomatic infections with the novel coronavirus (COVID-19): A systematic review  
51 552 and meta-analysis. *Int J Infect Dis*. 2021;104:458-64.
- 52  
53  
54  
55 553 33. Bamgboye EL, Omiye JA, Afolaranmi OJ, Davids MR, Tannor EK, Wadee S, et al. COVID-19  
56 554 Pandemic: Is Africa Different? *Journal of the National Medical Association*. 2020.

- 1  
2  
3 555 34. Griffith GJ, Morris TT, Tudball MJ, Herbert A, Mancano G, Pike L, et al. Collider bias undermines  
4 556 our understanding of COVID-19 disease risk and severity. *Nature communications*. 2020;11(1):5749.
- 5  
6  
7 557 35. Padula WV. Why only test symptomatic patients? consider random screening for covid-19. Springer;  
8 558 2020.
- 9  
10  
11 559 36. Tao J, Zhang X, Zhang X, Zhao S, Yang L, He D, et al. The time serial distribution and influencing  
12 560 factors of asymptomatic COVID-19 cases in Hong Kong. *One Health*. 2020.
- 13  
14  
15 561 37. Korber B, Fischer WM, Gnanakaran S, Yoon H, Theiler J, Abfalterer W, et al. Tracking changes in  
16 562 SARS-CoV-2 Spike: evidence that D614G increases infectivity of the COVID-19 virus. *Cell*.  
17 563 2020;182(4):812-27. e19.
- 18  
19  
20 564 38. Meng F, Xu R, Wang S, Xu Z, Zhang C, Li Y, et al. Human umbilical cord-derived mesenchymal  
21 565 stem cell therapy in patients with COVID-19: a phase 1 clinical trial. *Signal transduction and targeted*  
22 566 *therapy*. 2020;5(1):172.
- 23  
24  
25 567 39. Higgins JP. Commentary: Heterogeneity in meta-analysis should be expected and appropriately  
26 568 quantified. *International journal of epidemiology*. 2008;37(5):1158-60.
- 27  
28  
29 569 40. Zhu J, Ji P, Pang J, Zhong Z, Li H, He C, et al. Clinical characteristics of 3062 COVID-19 patients:  
30 570 a meta-analysis. *Journal of medical virology*. 2020;92(10):1902-14.
- 31  
32  
33 571 41. Boum Y, Fai KN, Nikolay B, Mboringong AB, Bebell LM, Ndifon M, et al. Performance and  
34 572 operational feasibility of antigen and antibody rapid diagnostic tests for COVID-19 in symptomatic and  
35 573 asymptomatic patients in Cameroon: a clinical, prospective, diagnostic accuracy study. *The Lancet*  
36 574 *Infectious Diseases*. 2021.
- 37  
38  
39 575  
40  
41  
42 576  
43  
44  
45  
46  
47  
48  
49  
50  
51  
52  
53  
54  
55  
56  
57  
58  
59  
60

1  
2  
3  
4 577 **Tables and Figures Legends**

5  
6 578 **Table 1** Results of univariate and multivariate meta-regression analysis

7  
8  
9 579 **Figure 1** The process of study selection for the meta-analysis

10  
11  
12 580 **Figure 2** Meta-analysis of the asymptomatic ratio among ascertained COVID-19  
13  
14 581 infections (including and excluding pre-symptomatic infections)

15  
16  
17 582 **Figure 3** Asymptomatic ratio among ascertained COVID-19 infections by patient  
18  
19 583 group, age group, screening study, region, and time trend

20  
21 584 **Supplementary Table 1** Search strategy for systematic review

22  
23  
24 585 **Supplementary Table 2** Characteristics of the studies included for meta-analysis

25  
26  
27 586 **Supplementary Table 3** Quality assessment of selected articles

28  
29  
30 587 **Supplementary Table 4** Results of sensitivity analysis

**Table 1 Results of Univariate and Multivariate Meta-regression Analysis**

| Variable              | Univariate Regression Analysis |               |               |                 | Multivariate Regression Analysis |               |                 |
|-----------------------|--------------------------------|---------------|---------------|-----------------|----------------------------------|---------------|-----------------|
|                       | No. of Studies (%)             | Crude Meta-RR | 95% CI        | <i>p</i> -value | Adjusted Meta-RR                 | 95% CI        | <i>p</i> -value |
| <b>Patient Group</b>  |                                |               |               |                 |                                  |               |                 |
| Children              | 30 (12.45%)                    | 1 (Reference) | 1 (Reference) |                 | 1 (Reference)                    | 1 (Reference) |                 |
| Pregnant              | 17 (7.05%)                     | 1.16          | (0.99-1.37)   | 0.074           | 1.02                             | (0.75-1.10)   | 0.901           |
| Adults                | 194 (80.50%)                   | 0.91          | (0.82-1.00)   | 0.057           | 0.83                             | (0.63-1.11)   | 0.209           |
| <b>Age</b>            |                                |               |               |                 |                                  |               |                 |
| ≤18y                  | 30 (12.45%)                    | 1 (Reference) | 1 (Reference) |                 | 1 (Reference)                    | 1 (Reference) |                 |
| 19-45y                | 102 (42.32%)                   | 0.98          | (0.88-1.09)   | 0.682           | 1.12                             | (0.84-1.48)   | 0.446           |
| >45y                  | 68 (27.39%)                    | 0.87          | (0.77-0.97)   | 0.015           | 1.09                             | (0.82-1.45)   | 0.539           |
| NM                    | 43 (17.84%)                    | 0.93          | (0.83-1.05)   | 0.252           | 1.13                             | (0.85-1.49)   | 0.393           |
| <b>Screening</b>      |                                |               |               |                 |                                  |               |                 |
| Non-screening studies | 176 (73.03%)                   | 1 (Reference) | 1 (Reference) |                 | 1 (Reference)                    | 1 (Reference) |                 |

|    |                       |              |               |               |        |               |                    |
|----|-----------------------|--------------|---------------|---------------|--------|---------------|--------------------|
| 1  |                       |              |               |               |        |               |                    |
| 2  |                       |              |               |               |        |               |                    |
| 3  |                       |              |               |               |        |               |                    |
| 4  | Screening studies     | 65 (26.97%)  | 1.16          | (1.08 -1.25)  | <0.001 | 1.08          | (1.01-1.17) 0.031  |
| 5  |                       |              |               |               |        |               |                    |
| 6  | <b>Region</b>         |              |               |               |        |               |                    |
| 7  |                       |              |               |               |        |               |                    |
| 8  |                       |              |               |               |        |               |                    |
| 9  | Africa                | 12 (5.00%)   | 1 (Reference) | 1 (Reference) |        | 1 (Reference) | 1 (Reference)      |
| 10 |                       |              |               |               |        |               |                    |
| 11 | America               | 25 (10.42%)  | 0.78          | (0.67-0.90)   | 0.001  | 0.71          | (0.62-0.82) <0.001 |
| 12 |                       |              |               |               |        |               |                    |
| 13 | Asia                  | 175 (72.92%) | 0.64          | (0.56-0.72)   | <0.001 | 0.78          | (0.68-0.89) <0.001 |
| 14 |                       |              |               |               |        |               |                    |
| 15 | Europe                | 28 (11.67%)  | 0.71          | (0.62-0.82)   | <0.001 | 0.69          | (0.60-0.78) <0.001 |
| 16 |                       |              |               |               |        |               |                    |
| 17 |                       |              |               |               |        |               |                    |
| 18 | <b>Time Trend</b>     |              |               |               |        |               |                    |
| 19 |                       |              |               |               |        |               |                    |
| 20 |                       |              |               |               |        |               |                    |
| 21 | Before March 2020     | 95 (39.42%)  | 1 (Reference) | 1 (Reference) |        | 1 (Reference) | 1 (Reference)      |
| 22 |                       |              |               |               |        |               |                    |
| 23 | March 2020 afterwards | 68 (28.22%)  | 1.33          | (1.24-1.43)   | <0.001 | 1.29          | (1.17-1.43) <0.001 |
| 24 |                       |              |               |               |        |               |                    |
| 25 | NM                    | 78 (32.37%)  | 1.07          | (1.00-1.14)   | 0.092  | 1.05          | (0.98-1.12) 0.158  |
| 26 |                       |              |               |               |        |               |                    |
| 27 |                       |              |               |               |        |               |                    |
| 28 | NM, not mentioned.    |              |               |               |        |               |                    |
| 29 |                       |              |               |               |        |               |                    |
| 30 |                       |              |               |               |        |               |                    |
| 31 |                       |              |               |               |        |               |                    |
| 32 |                       |              |               |               |        |               |                    |
| 33 |                       |              |               |               |        |               |                    |
| 34 |                       |              |               |               |        |               |                    |
| 35 |                       |              |               |               |        |               |                    |
| 36 |                       |              |               |               |        |               |                    |
| 37 |                       |              |               |               |        |               |                    |
| 38 |                       |              |               |               |        |               |                    |
| 39 |                       |              |               |               |        |               |                    |
| 40 |                       |              |               |               |        |               |                    |
| 41 |                       |              |               |               |        |               |                    |
| 42 |                       |              |               |               |        |               |                    |
| 43 |                       |              |               |               |        |               |                    |
| 44 |                       |              |               |               |        |               |                    |
| 45 |                       |              |               |               |        |               |                    |
| 46 |                       |              |               |               |        |               |                    |

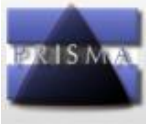

## PRISMA 2009 Flow Diagram

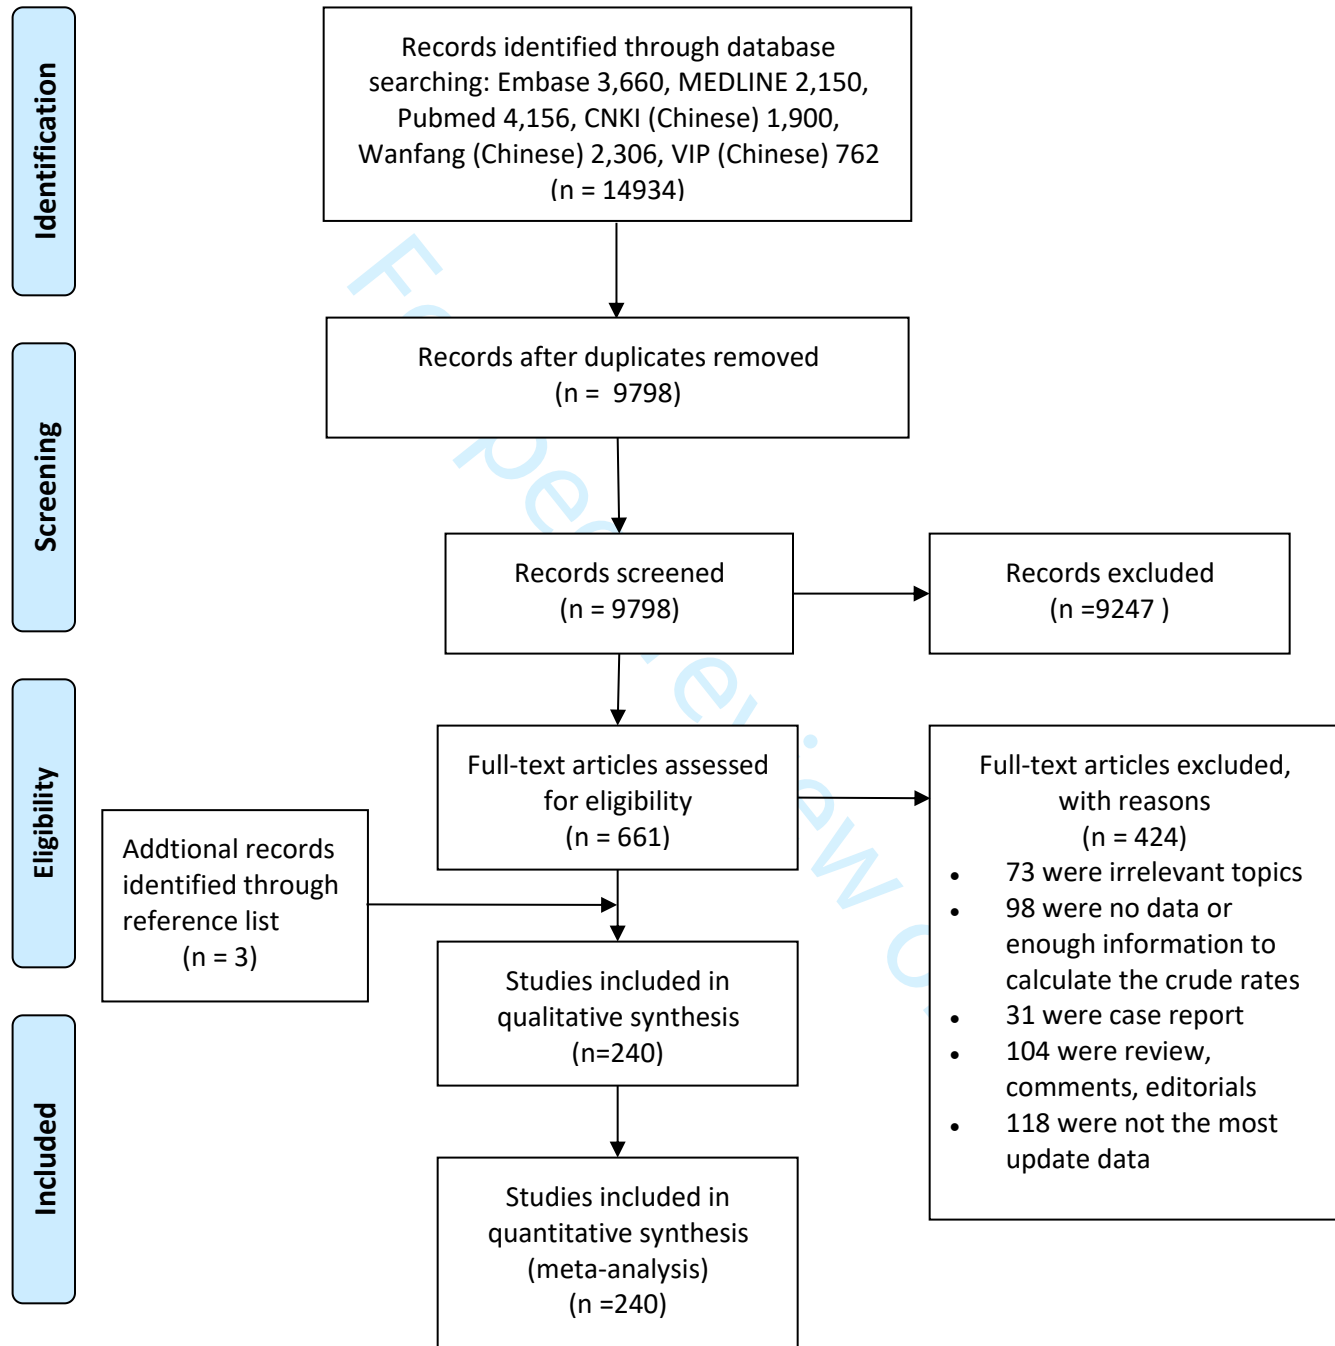

From: Moher D, Liberati A, Tetzlaff J, Altman DG, The PRISMA Group (2009). Preferred Reporting Items for Systematic Reviews and Meta-Analyses: The PRISMA Statement. PLoS Med 6(7): e1000097. doi:10.1371/journal.pmed1000097

For more information, visit [www.prisma-statement.org](http://www.prisma-statement.org).

For peer review only - <http://bmjopen.bmj.com/site/about/guidelines.xhtml>



Figure 2 Meta-analysis of the asymptomatic ratio among COVID-19 patients (including and excluding pre-symptomatic infections)

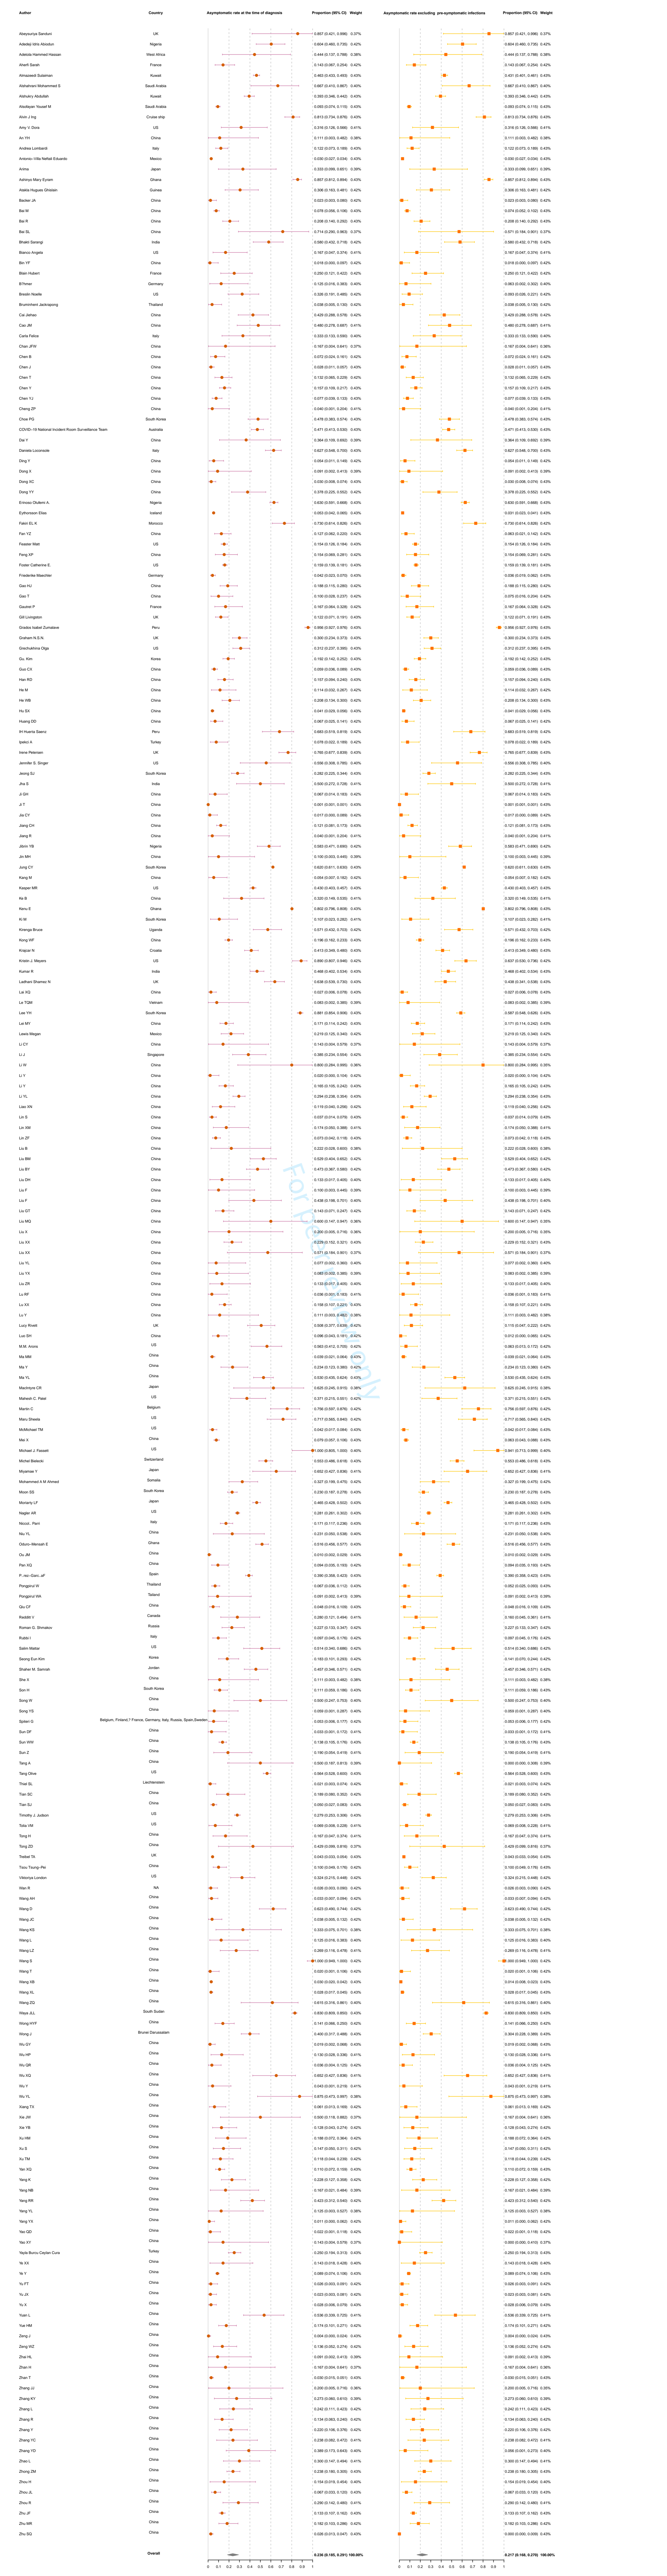

Figure 3 Asymptomatic ratio among COVID-19 patients by patient group, age group, screening study, region, and time trend

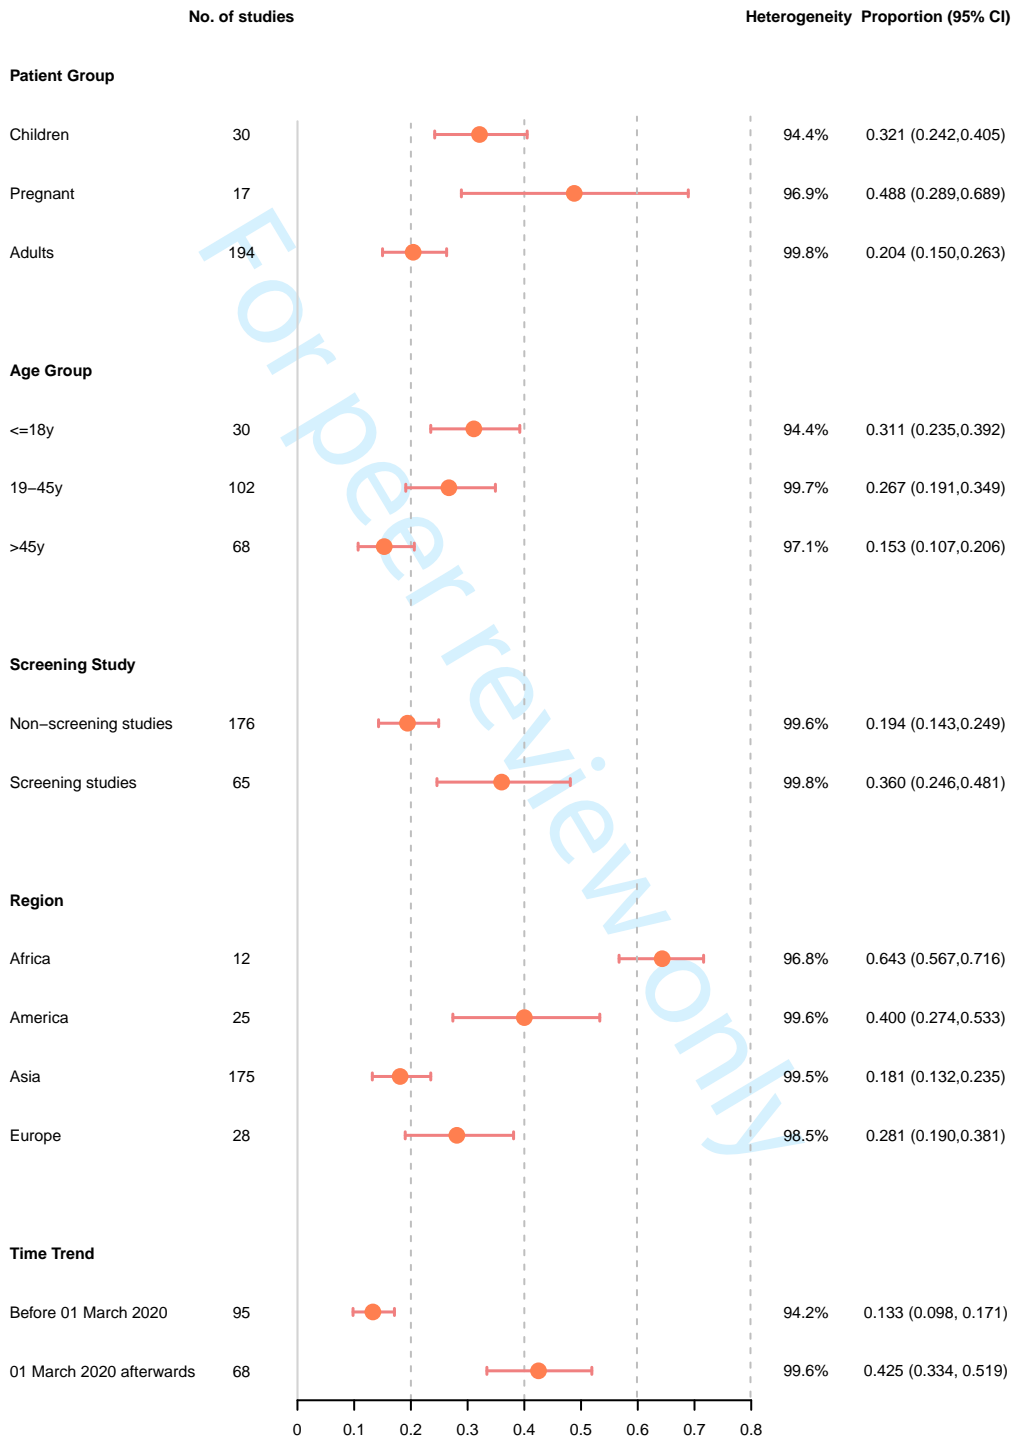

1  
2  
3  
4 **Supplementary Tables and Figure Legends**

5 **Supplementary Table 1** Search strategy for systematic review

6  
7 **Supplementary Table 2** Characteristics of the studies included for meta-analysis

8  
9 **Supplementary Table 3** Quality assessment of selected articles

10  
11 **Supplementary Table 4** Results of sensitivity analysis  
12  
13  
14  
15  
16  
17  
18  
19  
20  
21  
22  
23  
24  
25  
26  
27  
28  
29  
30  
31  
32  
33  
34  
35  
36  
37  
38  
39  
40  
41  
42  
43  
44  
45  
46  
47  
48  
49  
50  
51  
52  
53  
54  
55  
56  
57  
58  
59  
60

For peer review only

**Supplementary Table 1 Search strategy for systematic review**  
**Medline (n=2,150)**

| # ▲ | Searches                                              | Results |
|-----|-------------------------------------------------------|---------|
| 1   | SARS-CoV-2.tw.                                        | 22572   |
| 2   | COVID-19.tw.                                          | 68487   |
| 3   | 2019-nCoV.tw.                                         | 811     |
| 4   | novel coronavirus.tw.                                 | 4999    |
| 5   | coronavirus 2019.tw.                                  | 928     |
| 6   | 2019 coronavirus.tw.                                  | 368     |
| 7   | Wuhan coronavirus.tw.                                 | 15      |
| 8   | Wuhan pneumonia.tw.                                   | 8       |
| 9   | COVID 19.tw.                                          | 68487   |
| 10  | Coronavirus Disease-19.tw.                            | 716     |
| 11  | SARS Coronavirus 2 Infection.tw.                      | 4       |
| 12  | 1 or 2 or 3 or 4 or 5 or 6 or 7 or 8 or 9 or 10 or 11 | 75773   |
| 13  | Asymptomatic.tw.                                      | 140452  |
| 14  | Asymptomatic Carrier*.tw.                             | 3332    |
| 15  | Asymptomatic positive*.tw.                            | 45      |
| 16  | No symptom*.tw.                                       | 8151    |
| 17  | No sign*.tw.                                          | 655183  |
| 18  | Asymptomatic individual*.tw.                          | 3748    |
| 19  | Asymptomatic person*.tw.                              | 742     |
| 20  | Asymptomatic patient*.tw.                             | 14504   |
| 21  | Asymptomatic case*.tw.                                | 1406    |
| 22  | Asymptomatic carriage.tw.                             | 560     |
| 23  | Asymptomatic proportion.tw.                           | 9       |

|    |    |                                                                                               |
|----|----|-----------------------------------------------------------------------------------------------|
| 1  |    |                                                                                               |
| 2  |    |                                                                                               |
| 3  |    |                                                                                               |
| 4  | 24 | Asymptomatic transmission.tw. 92                                                              |
| 5  |    |                                                                                               |
| 6  | 25 | Symptomless.tw. 1961                                                                          |
| 7  |    |                                                                                               |
| 8  | 26 | Asymptomatic contact.tw. 62                                                                   |
| 9  |    |                                                                                               |
| 10 | 27 | No respiratory symptom*.tw. 263                                                               |
| 11 |    |                                                                                               |
| 12 | 28 | Inapparent Infection*.tw. 365                                                                 |
| 13 |    |                                                                                               |
| 14 | 29 | Subclinical Infection*.tw. 1807                                                               |
| 15 |    |                                                                                               |
| 16 | 30 | Presymptomatic*.tw. 3821                                                                      |
| 17 |    |                                                                                               |
| 18 | 31 | Asymptomatic State*.tw. 222                                                                   |
| 19 |    |                                                                                               |
| 20 | 32 | Pre-Symptomatic Disease*.tw. 31                                                               |
| 21 |    |                                                                                               |
| 22 | 33 | 13 or 14 or 15 or 16 or 17 or 18 or 19 or 20 or 21 or 22 or 23 or 24 or 25 or 26 or 27 805657 |
| 23 |    |                                                                                               |
| 24 |    | or 28 or 29 or 30 or 31 or 32                                                                 |
| 25 |    |                                                                                               |
| 26 | 34 | 12 and 33 to yr="2019 - 2020" 2150                                                            |
| 27 |    |                                                                                               |
| 28 |    |                                                                                               |
| 29 |    |                                                                                               |
| 30 |    |                                                                                               |
| 31 |    |                                                                                               |
| 32 |    |                                                                                               |
| 33 |    |                                                                                               |
| 34 |    |                                                                                               |
| 35 |    |                                                                                               |
| 36 |    |                                                                                               |
| 37 |    |                                                                                               |
| 38 |    |                                                                                               |
| 39 |    |                                                                                               |
| 40 |    |                                                                                               |
| 41 |    |                                                                                               |
| 42 |    |                                                                                               |
| 43 |    |                                                                                               |
| 44 |    |                                                                                               |
| 45 |    |                                                                                               |
| 46 |    |                                                                                               |
| 47 |    |                                                                                               |
| 48 |    |                                                                                               |
| 49 |    |                                                                                               |
| 50 |    |                                                                                               |
| 51 |    |                                                                                               |
| 52 |    |                                                                                               |
| 53 |    |                                                                                               |
| 54 |    |                                                                                               |
| 55 |    |                                                                                               |
| 56 |    |                                                                                               |
| 57 |    |                                                                                               |
| 58 |    |                                                                                               |
| 59 |    |                                                                                               |
| 60 |    |                                                                                               |

review only

## PubMed (n=4,156)

| # ▲ | Searches                                              | Results |
|-----|-------------------------------------------------------|---------|
| 1   | Search: SARS-CoV-2 [Text Word]                        | 83767   |
| 2   | Search: COVID-19 [Text Word]                          | 129668  |
| 3   | Search: 2019-nCoV [Text Word]                         | 1629    |
| 4   | Search: novel coronavirus [Text Word]                 | 8709    |
| 5   | Search: coronavirus 2019[Text Word]                   | 1522    |
| 6   | Search: 2019 coronavirus [Text Word]                  | 525     |
| 7   | Search: Wuhan coronavirus [Text Word]                 | 15      |
| 8   | Search: Wuhan pneumonia [Text Word]                   | 8       |
| 9   | Search: COVID 19 [Text Word]                          | 129668  |
| 10  | Search: Coronavirus Disease-19 [Text Word]            | 1402    |
| 11  | Search: SARS Coronavirus 2 Infection [Text Word]      | 8       |
| 12  | 1 or 2 or 3 or 4 or 5 or 6 or 7 or 8 or 9 or 10 or 11 | 134001  |
| 13  | Search: Asymptomatic [Text Word]                      | 168176  |
| 14  | Search: Asymptomatic Carrier*[Text Word]              | 4055    |
| 15  | Search: Asymptomatic positive*[Text Word]             | 56      |
| 16  | Search: No symptom*[Text Word]                        | 10181   |
| 17  | Search: No sign*[Text Word]                           | 753877  |
| 18  | Search: Asymptomatic individual*[Text Word]           | 4437    |
| 19  | Search: Asymptomatic person*[Text Word]               | 831     |
| 20  | Search: Asymptomatic patient*[Text Word]              | 16575   |
| 21  | Search: Asymptomatic case*[Text Word]                 | 1792    |
| 22  | Search: Asymptomatic carriage [Text Word]             | 655     |
| 23  | Search: Asymptomatic proportion [Text Word]           | 12      |
| 24  | Search: Asymptomatic transmission [Text Word]         | 145     |

|    |    |                                                                                                |
|----|----|------------------------------------------------------------------------------------------------|
| 1  |    |                                                                                                |
| 2  |    |                                                                                                |
| 3  |    |                                                                                                |
| 4  | 25 | Search: Symptomless [Text Word] 2890                                                           |
| 5  |    |                                                                                                |
| 6  | 26 | Search: Asymptomatic contact [Text Word] 73                                                    |
| 7  |    |                                                                                                |
| 8  | 27 | Search: No respiratory symptom*[Text Word] 306                                                 |
| 9  |    |                                                                                                |
| 10 | 28 | Search: Inapparent Infection*[Text Word] 396                                                   |
| 11 |    |                                                                                                |
| 12 | 29 | Search: Subclinical Infection*[Text Word] 2030                                                 |
| 13 |    |                                                                                                |
| 14 | 30 | Search: Presymptomatic*[Text Word] 5647                                                        |
| 15 |    |                                                                                                |
| 16 | 31 | Search: Asymptomatic State*[Text Word] 264                                                     |
| 17 |    |                                                                                                |
| 18 | 32 | Search: Pre-Symptomatic Disease*[Text Word] 36                                                 |
| 19 |    |                                                                                                |
| 20 | 33 | 13 or 14 or 15 or 16 or 17 or 18 or 19 or 20 or 21 or 22 or 23 or 24 or 25 or 26 or 27 1029910 |
| 21 |    |                                                                                                |
| 22 |    | or 28 or 29 or 30 or 31 or 32                                                                  |
| 23 |    |                                                                                                |
| 24 | 34 | 12 and 33 yr="2019/11/01 - 2020/12/31" 4156                                                    |
| 25 |    |                                                                                                |
| 26 |    |                                                                                                |
| 27 |    |                                                                                                |
| 28 |    |                                                                                                |
| 29 |    |                                                                                                |
| 30 |    |                                                                                                |
| 31 |    |                                                                                                |
| 32 |    |                                                                                                |
| 33 |    |                                                                                                |
| 34 |    |                                                                                                |
| 35 |    |                                                                                                |
| 36 |    |                                                                                                |
| 37 |    |                                                                                                |
| 38 |    |                                                                                                |
| 39 |    |                                                                                                |
| 40 |    |                                                                                                |
| 41 |    |                                                                                                |
| 42 |    |                                                                                                |
| 43 |    |                                                                                                |
| 44 |    |                                                                                                |
| 45 |    |                                                                                                |
| 46 |    |                                                                                                |
| 47 |    |                                                                                                |
| 48 |    |                                                                                                |
| 49 |    |                                                                                                |
| 50 |    |                                                                                                |
| 51 |    |                                                                                                |
| 52 |    |                                                                                                |
| 53 |    |                                                                                                |
| 54 |    |                                                                                                |
| 55 |    |                                                                                                |
| 56 |    |                                                                                                |
| 57 |    |                                                                                                |
| 58 |    |                                                                                                |
| 59 |    |                                                                                                |
| 60 |    |                                                                                                |

**Embase (n=3,660)**

| # ▲ | Searches                                              | Results |
|-----|-------------------------------------------------------|---------|
| 1   | SARS-CoV-2.tw.                                        | 35873   |
| 2   | COVID-19.tw.                                          | 112478  |
| 3   | 2019-nCoV.tw.                                         | 1252    |
| 4   | novel coronavirus.tw.                                 | 7926    |
| 5   | coronavirus 2019.tw.                                  | 1403    |
| 6   | 2019 coronavirus.tw.                                  | 494     |
| 7   | Wuhan coronavirus.tw.                                 | 24      |
| 8   | Wuhan pneumonia.tw.                                   | 11      |
| 9   | COVID 19.tw.                                          | 112478  |
| 10  | Coronavirus Disease-19.tw.                            | 1309    |
| 11  | SARS Coronavirus 2 Infection.tw.                      | 7       |
| 12  | 1 or 2 or 3 or 4 or 5 or 6 or 7 or 8 or 9 or 10 or 11 | 123709  |
| 13  | Asymptomatic.tw.                                      | 236862  |
| 14  | Asymptomatic Carrier*.tw.                             | 4966    |
| 15  | Asymptomatic positive*.tw.                            | 88      |
| 16  | No symptom*.tw.                                       | 15110   |
| 17  | No sign*.tw.                                          | 1097376 |
| 18  | Asymptomatic individual*.tw.                          | 6175    |
| 19  | Asymptomatic person*.tw.                              | 1038    |
| 20  | Asymptomatic patient*.tw.                             | 24930   |
| 21  | Asymptomatic case*.tw.                                | 2480    |
| 22  | Asymptomatic carriage.tw.                             | 794     |
| 23  | Asymptomatic proportion.tw.                           | 17      |
| 24  | Asymptomatic transmission.tw.                         | 119     |



|    |    |                                                                                             |
|----|----|---------------------------------------------------------------------------------------------|
| 1  |    |                                                                                             |
| 2  |    |                                                                                             |
| 3  |    |                                                                                             |
| 4  | 25 | Symptomless.tw. 2478                                                                        |
| 5  |    |                                                                                             |
| 6  | 26 | Asymptomatic contact.tw. 85                                                                 |
| 7  |    |                                                                                             |
| 8  | 27 | No respiratory symptom*.tw. 536                                                             |
| 9  |    |                                                                                             |
| 10 | 28 | Inapparent Infection*.tw. 374                                                               |
| 11 |    |                                                                                             |
| 12 | 29 | Subclinical Infection*.tw. 2235                                                             |
| 13 |    |                                                                                             |
| 14 | 30 | Presymptomatic*.tw. 5955                                                                    |
| 15 |    |                                                                                             |
| 16 | 31 | Asymptomatic State*.tw. 363                                                                 |
| 17 |    |                                                                                             |
| 18 | 32 | Pre-Symptomatic Disease*.tw. 69                                                             |
| 19 |    |                                                                                             |
| 20 | 33 | 13 or 14 or 15 or 16 or 17 or 18 or 19 or 20 or 21 or 22 or 23 or 24 or 25 or 26 or 1346922 |
| 21 |    |                                                                                             |
| 22 |    | 27 or 28 or 29 or 30 or 31 or 32                                                            |
| 23 |    |                                                                                             |
| 24 | 34 | 13 and 42 yr="2019 - 2020" 3660                                                             |
| 25 |    |                                                                                             |
| 26 |    |                                                                                             |
| 27 |    |                                                                                             |
| 28 |    |                                                                                             |
| 29 |    |                                                                                             |
| 30 |    |                                                                                             |
| 31 |    |                                                                                             |
| 32 |    |                                                                                             |
| 33 |    |                                                                                             |
| 34 |    |                                                                                             |
| 35 |    |                                                                                             |
| 36 |    |                                                                                             |
| 37 |    |                                                                                             |
| 38 |    |                                                                                             |
| 39 |    |                                                                                             |
| 40 |    |                                                                                             |
| 41 |    |                                                                                             |
| 42 |    |                                                                                             |
| 43 |    |                                                                                             |
| 44 |    |                                                                                             |
| 45 |    |                                                                                             |
| 46 |    |                                                                                             |
| 47 |    |                                                                                             |
| 48 |    |                                                                                             |
| 49 |    |                                                                                             |
| 50 |    |                                                                                             |
| 51 |    |                                                                                             |
| 52 |    |                                                                                             |
| 53 |    |                                                                                             |
| 54 |    |                                                                                             |
| 55 |    |                                                                                             |
| 56 |    |                                                                                             |
| 57 |    |                                                                                             |
| 58 |    |                                                                                             |
| 59 |    |                                                                                             |
| 60 |    |                                                                                             |

1  
2  
3  
4 CNKI (n=1,900)

5 FT=("新型冠状病毒"+"新冠肺炎"+"新型冠状病毒肺炎"+"严重急性呼吸综合征冠状病毒  
6 2"+"2019-nCov"+"2019 新型冠状病毒"+"2019 冠状病毒"+"corona virus  
7 disease-19"+"COVID-19"+"SARS-COV-2"+"novel coronavirus pneumonia"+"NCP")and FT=("  
8 无症状"+"无症状携带者"+"无症状患者"+"无症状阳性"+"无症状的阳检测病例"+"检测患者  
9 "+"没有症状"+"无症状感染"+"无症状感染者"+"无临床症状"+"无感染症状"+"无相关感染症  
10 状"+"无临床特征"+"没有临床特征"+"无明显症状"+"没有明显症状"+"隐性感染"+"隐性感染  
11 者")  
12  
13  
14

15 WanFang (n=2,306)

16 (全部:(新型冠状病毒+新冠肺炎+新型冠状病毒肺炎+严重急性呼吸综合征冠状病毒  
17 2+2019-nCov+2019 新型冠状病毒 +2019 冠状病毒 +corona virus  
18 disease-19+COVID-19+SARS-COV-2+novel coronavirus pneumonia+NCP)\*全部:(无症状+无症  
19 状携带者+无症状患者+无症状阳性+无症状的阳检测病例+检测患者+没有症状+无症状感染  
20 +无症状感染者+无临床症状+无感染症状+无相关感染症状+无临床特征+没有临床特征+无  
21 明显症状+没有明显症状+隐性感染+隐性感染者)) \*Date:2019-  
22  
23  
24  
25  
26  
27

28 VIP (n=762)

29 (U=(新型冠状病毒 OR 新冠肺炎 OR 新型冠状病毒肺炎 OR 严重急性呼吸综合征冠状病  
30 毒 2 OR 2019-nCov OR 2019 新型冠状病毒 OR 2019 冠状病毒 OR corona virus disease-19 OR  
31 COVID-19 OR SARS-COV-2 OR novel coronavirus pneumonia OR NCP)) AND (U=(无症状  
32 OR 无症状携带者 OR 无症状患者 OR 无症状阳性 OR 无症状的阳检测病例 OR 检测患  
33 者 OR 没有症状 OR 无症状感染 OR 无症状感染者 OR 无临床症状 OR 无感染症状  
34 OR 无相关感染症状 OR 无临床特征 OR 没有临床特征 OR 无明显症状 OR 没有明显症  
35 状 OR 隐性感染 OR 隐性感染者))  
36  
37  
38  
39  
40  
41  
42  
43  
44  
45  
46  
47  
48  
49  
50  
51  
52  
53  
54  
55  
56  
57  
58  
59  
60

**Supplementary Table 2 Characteristics of the studies included for meta-analysis**

| Author                            | City/Province           | Country      | Sample size | Age (mean or median [ $\pm$ SD or IQR]; range) | Study population | Male (%) | Positive patient (n) | The number of test-positive and asymptomatic patients (n) | The number of presymptomatic infections (n) | Confirmed date        |
|-----------------------------------|-------------------------|--------------|-------------|------------------------------------------------|------------------|----------|----------------------|-----------------------------------------------------------|---------------------------------------------|-----------------------|
| Abey Suriya Sanduni(1)            | London                  | UK           | 180         | Mean:29.9y ( $\pm$ 7.4)                        | Pregnant         | 0.0      | 7                    | 6                                                         | 0                                           | 2020/04/22-2020/05/05 |
| Adedeji Idris Abiodun(2)          | Bauchi State            | Nigeria      | 53          | Mean:12.63y ( $\pm$ 4.31)                      | Children         | 52.8     | 53                   | 32                                                        | 0                                           | 2020/03/-2020/06      |
| Adetola Hammed Hassan(3)          | northern Sierra Leone   | West Africa  | 30          | Mean: 69.0 months ( $\pm$ 51.7)                | Children         | 55.6     | 9                    | 4                                                         | 0                                           | 2020/04/24-2020/09    |
| Aherfi Sarah(4)                   | Marseille               | France       | 63          | Mean: 45y                                      | Adult            | NA       | 63                   | 9                                                         | 0                                           | 2020/03/15-2020/03/30 |
| Almazeedi Sulaiman(5)             | South Surra             | Kuwait       | 1096        | Median: 41y                                    | Adult            | 81.0     | 1096                 | 507                                                       | 35                                          | 2020/02/24-2020/04/20 |
| Alshahrani Mohammed S(6)          | Alkhobar                | Saudi Arabia | 301         | Mean: 32.9y ( $\pm$ 8.7)                       | Adult            | 38.9     | 18                   | 12                                                        | 0                                           | 2020/05/01-2020/06/15 |
| Alshukry Abdullah(7)              | South Surra             | Kuwait       | 417         | Median: 47y (IQR:32-60y)                       | Adult            | 62.8     | 417                  | 164                                                       | 0                                           | 2020/02/24-2020/05/24 |
| Alsofayan Yousef M(8)             | NA                      | Saudi Arabia | 825         | Median: 36y                                    | Adult            | 54.3     | 825                  | 77                                                        | 0                                           | 2020/03/01-2020/03/31 |
| Alvin J Ing(9)                    | Cruise ship             | Cruise ship  | 217         | NA                                             | Adult            | NA       | 128                  | 104                                                       | 0                                           | 2020/04/03            |
| Amy V. Dora(10)                   | Los Angeles, California | US           | 19          | Median: 75y (66-85y)                           | Adult            | 100.0    | 19                   | 6                                                         | 0                                           | 2020/3/29-2020/3/21   |
| An YH(11)                         | Beijing                 | China        | 54          | Median: 48y (37-87y)                           | Adult            | 44.0     | 9                    | 1                                                         | 0                                           | 2020/01/21-2020/03/04 |
| Andrea Lombardi(12)               | Lombardy                | Italy        | 1573        | Mean: 44.5y                                    | Adult            | 35.8     | 139                  | 17                                                        | 0                                           | 2020/02/24-2020/03/31 |
| Antonio-Villa Neftali Eduardo(13) | NA                      | Mexico       | 35095       | Mean:40.2y ( $\pm$ 10.7)                       | Adult            | 37.0     | 11226                | 341                                                       | 0                                           | till 2020/07/05       |
| Arima(14)                         | Japan                   | Japan        | 566         | NA                                             | Adult            | NA       | 12                   | 4                                                         | 0                                           | 2020/1-2020/2         |

|    |                            |               |          |     |                              |          |      |     |     |    |                       |
|----|----------------------------|---------------|----------|-----|------------------------------|----------|------|-----|-----|----|-----------------------|
| 1  | Ashinyo Mary Eyrarn(15)    | Greater Accra | Ghana    | 307 | Mean: 37.9y ( $\pm 16.3$ )   | Adult    | 56.7 | 307 | 263 | 0  | 2020/03/23-2020/06/29 |
| 2  |                            |               |          |     |                              |          |      |     |     |    |                       |
| 3  | Atakla Hugues Ghislain(16) | Conakry       | Guinea   | 36  | Mean: 9.66y ( $\pm 1.32$ )   | Children | 55.6 | 36  | 11  | 0  | 2020/01/01-2020/09/30 |
| 4  |                            |               |          |     |                              |          |      |     |     |    |                       |
| 5  |                            |               |          |     |                              |          |      |     |     |    |                       |
| 6  | Backer JA(17)              | Wuhan         | China    | 88  | Range: 2-72y                 | Adult    | 65.0 | 88  | 2   | 0  | 2020/01/22-2020/01/29 |
| 7  |                            |               |          |     |                              |          |      |     |     |    |                       |
| 8  | Bai M(18)                  | Wuhan         | China    | 472 | Mean: 50.7y ( $\pm 11.6$ )   | Adult    | 46.0 | 472 | 37  | 2  | 2020/02/12-2020/03/08 |
| 9  |                            |               |          |     |                              |          |      |     |     |    |                       |
| 10 |                            |               |          |     |                              |          |      |     |     |    |                       |
| 11 | Bai R(19)                  | Xian          | China    | 120 | Mean: 43y (range: 1.5-93y)   | Adult    | 48.0 | 120 | 25  | 0  | 2020/01/01-2020/03/06 |
| 12 |                            |               |          |     |                              |          |      |     |     |    |                       |
| 13 | Bai SL(20)                 | Gansu         | China    | 8   | Median: 50.5y (range: 2-82y) | Adult    | 50.0 | 7   | 5   | 1  | 2020/01/22-2020/01/31 |
| 14 |                            |               |          |     |                              |          |      |     |     |    |                       |
| 15 |                            |               |          |     |                              |          |      |     |     |    |                       |
| 16 | Bhakti Sarangi(21)         | Maharashtra   | India    | 50  | Median: 6y(IQR: 2-12y)       | Children | 56.0 | 50  | 29  | 0  | 2020/04/01-2020/05/20 |
| 17 |                            |               |          |     |                              |          |      |     |     |    |                       |
| 18 | Bianco Angela(22)          | New York      | US       | 155 | Mean: 32.7y ( $\pm 6.4$ )    | Pregnant | 0.0  | 24  | 4   | 0  | 2020/04/04-2020/04/15 |
| 19 |                            |               |          |     |                              |          |      |     |     |    |                       |
| 20 |                            |               |          |     |                              |          |      |     |     |    |                       |
| 21 | Bin YF(23)                 | Wuhan         | China    | 55  | Mean: 53.9y ( $\pm 17.1$ )   | Adult    | 56.0 | 55  | 1   | 0  | 2020/01/29-2020/02/16 |
| 22 |                            |               |          |     |                              |          |      |     |     |    |                       |
| 23 | Blain Hubert(24)           | Montpellier   | France   | 113 | Mean: 86y ( $\pm 15.5$ )     | Adult    | NA   | 36  | 9   | 0  | 2020/03/03-2020/03/06 |
| 24 |                            |               |          |     |                              |          |      |     |     |    |                       |
| 25 |                            |               |          |     |                              |          |      |     |     |    |                       |
| 26 | Böhmer(25)                 | Bavaria       | Germany  | 16  | Median: 35y (range: 2-58y)   | Adult    | 75.0 | 16  | 2   | 1  | 2020/1/1-2020/2/19    |
| 27 |                            |               |          |     |                              |          |      |     |     |    |                       |
| 28 | Breslin Noelle(26)         | New York      | US       | 43  | Mean: 29.7y ( $\pm 6.0$ )    | Pregnant | 0.0  | 43  | 14  | 10 | 2020/03/12-2020/03/27 |
| 29 |                            |               |          |     |                              |          |      |     |     |    |                       |
| 30 |                            |               |          |     |                              |          |      |     |     |    |                       |
| 31 | Bruminhent Jackrapong(27)  | Bangkok       | Thailand | 405 | Mean: 36y ( $\pm 10$ )       | Adult    | 34.0 | 53  | 2   | 0  | 2020/03/23-2020/04/07 |
| 32 |                            |               |          |     |                              |          |      |     |     |    |                       |
| 33 | Cai Jichao(28)             | Shanghai      | China    | 49  | Mean: 11.5y ( $\pm 5.12$ )   | Children | 57.1 | 49  | 21  | 0  | 2020/01/19-2020/04/30 |
| 34 |                            |               |          |     |                              |          |      |     |     |    |                       |
| 35 |                            |               |          |     |                              |          |      |     |     |    |                       |
| 36 | Cao JM(29)                 | Nanchong      | China    | 25  | Range: 10-77y                | Adult    | 48.0 | 25  | 12  | 0  | 2020/01/21-2020/02/18 |
| 37 |                            |               |          |     |                              |          |      |     |     |    |                       |
| 38 | Carla Felice(30)           | NA            | Italy    | 98  | NA                           | Adult    | 39.0 | 18  | 6   | 0  | NA                    |
| 39 |                            |               |          |     |                              |          |      |     |     |    |                       |
| 40 |                            |               |          |     |                              |          |      |     |     |    |                       |
| 41 | Chan JFW(31)               | Wuhan         | China    | 7   | Mean: 46.17y(range: 10-66y)  | Adult    | 50.0 | 6   | 1   | 0  | 2020/01/10-2020/01/15 |
| 42 |                            |               |          |     |                              |          |      |     |     |    |                       |
| 43 |                            |               |          |     |                              |          |      |     |     |    |                       |
| 44 |                            |               |          |     |                              |          |      |     |     |    |                       |
| 45 |                            |               |          |     |                              |          |      |     |     |    |                       |
| 46 |                            |               |          |     |                              |          |      |     |     |    |                       |

|    |                            |             |             |      |                                       |          |      |      |     |    |                       |
|----|----------------------------|-------------|-------------|------|---------------------------------------|----------|------|------|-----|----|-----------------------|
| 1  | Chen B(32)                 | Hainan      | China       | 69   | Median: 51y (range: 28-83y)           | Adult    | 59.0 | 69   | 5   | 0  | 2020/01/18-2020/02/29 |
| 2  |                            |             |             |      |                                       |          |      |      |     |    |                       |
| 3  | Chen J(33)                 | Shanghai    | China       | 249  | Median: 51y (36-64y)                  | Adult    | 51.0 | 249  | 7   | 0  | 2020/01/20-2020/02/06 |
| 4  |                            |             |             |      |                                       |          |      |      |     |    |                       |
| 5  |                            |             |             |      |                                       |          |      |      |     |    |                       |
| 6  | Chen T(34)                 | Wuhan       | China       | 76   | Mean: 59.5y (range: 28-86y)           | Adult    | 57.0 | 76   | 10  | 0  | 2020/01-2020/02       |
| 7  |                            |             |             |      |                                       |          |      |      |     |    |                       |
| 8  | Chen Y(35)                 | Ningbo      | China       | 187  | Median: 12y(range: 30-70y)            | Adult    | NA   | 191  | 30  | 0  | 2020/01/21-2020/03/06 |
| 9  |                            |             |             |      |                                       |          |      |      |     |    |                       |
| 10 |                            |             |             |      |                                       |          |      |      |     |    |                       |
| 11 | Chen YJ(36)                | Chongqing   | China       | 143  | Mean: 45.13y (range: 15-79y)          | Adult    | 51.0 | 143  | 11  | 0  | 2020/01/23-2020/02/08 |
| 12 |                            |             |             |      |                                       |          |      |      |     |    |                       |
| 13 | Cheng ZP(37)               | Yantai      | China       | 25   | Median: 42y (±12)                     | Adult    | 56.0 | 25   | 1   | 0  | 2020/01-2020/02       |
| 14 |                            |             |             |      |                                       |          |      |      |     |    |                       |
| 15 |                            |             |             |      |                                       |          |      |      |     |    |                       |
| 16 | Choe PG(38)                | Seoul       | South Korea | 113  | Median:25y (IQR: 21.5-39.5y)          | Adult    | 47.8 | 113  | 54  | 0  | 2020/03/05-2020/04/09 |
| 17 |                            |             |             |      |                                       |          |      |      |     |    |                       |
| 18 | COVID-19 National Incident | NA          | Australia   | 295  | Median: 47y (range: 0-94y)            | Adult    | 50.0 | 295  | 139 | 0  | 2020/01/21-2020/03/14 |
| 19 | Room Surveillance Team(39) |             |             |      |                                       |          |      |      |     |    |                       |
| 20 |                            |             |             |      |                                       |          |      |      |     |    |                       |
| 21 | Dai Y(40)                  | Guangxi     | China       | 11   | Median:6.1y(range: 0.25-15y)          | Children | 36.3 | 11   | 4   | 0  | 2020/01/19-2020/03/11 |
| 22 |                            |             |             |      |                                       |          |      |      |     |    |                       |
| 23 | Daniela Loconsole(41)      | Apulia      | Italy       | 166  | Median:11y(range: 0-17y)              | Children | 48.8 | 166  | 104 | 0  | 2020/03/01-2020/06/01 |
| 24 |                            |             |             |      |                                       |          |      |      |     |    |                       |
| 25 |                            |             |             |      |                                       |          |      |      |     |    |                       |
| 26 | Ding Y(42)                 | Wuhan       | China       | 56   | Mean: 54.6y (range: 24-86y)           | Adult    | 54.0 | 56   | 3   | 0  | 2020/01/01-2020/02/03 |
| 27 |                            |             |             |      |                                       |          |      |      |     |    |                       |
| 28 |                            |             |             |      |                                       |          |      |      |     |    |                       |
| 29 | Dong X(43)                 | Wuhan       | China       | 11   | Median: 43y (range: 2-69y)            | Adult    | 45.0 | 11   | 1   | 0  | 2020/01/20-2020/02/29 |
| 30 |                            |             |             |      |                                       |          |      |      |     |    |                       |
| 31 | Dong XC(44)                | Tianjin     | China       | 135  | Mean: 48.62y (range:8-90y)            | Adult    | 53.0 | 135  | 4   | 0  | 2020/01/13-2020/02/20 |
| 32 |                            |             |             |      |                                       |          |      |      |     |    |                       |
| 33 |                            |             |             |      |                                       |          |      |      |     |    |                       |
| 34 | Dong YY(45)                | Yangzhou    | China       | 37   | Mean: 38.64y (range: 1-74y)           | Adult    | 59.0 | 37   | 14  | 0  | 2020/01-2020/02       |
| 35 |                            |             |             |      |                                       |          |      |      |     |    |                       |
| 36 | Erinoso Olufemi A.(46)     | Lagos State | Nigeria     | 632  | Median:40y (IQR:30.5-49y)             | Adult    | 60.1 | 632  | 398 | 0  | 2020/04/01-2020/05/31 |
| 37 |                            |             |             |      |                                       |          |      |      |     |    |                       |
| 38 | Eythorsson Elias(47)       | NA          | Iceland     | 1564 | Median:40y(IQR:26-53y, range: 0-103y) | Adult    | 51.0 | 1564 | 83  | 34 | 2020/03/17-2020/04/30 |
| 39 |                            |             |             |      |                                       |          |      |      |     |    |                       |
| 40 |                            |             |             |      |                                       |          |      |      |     |    |                       |
| 41 | Fakiri EL K(48)            | Marrakesh   | Morocco     | 74   | Mean: 7y (±1.5)                       | Children | 54.1 | 74   | 54  | 0  | 2020/03/02-2020/04/01 |
| 42 |                            |             |             |      |                                       |          |      |      |     |    |                       |
| 43 |                            |             |             |      |                                       |          |      |      |     |    |                       |
| 44 |                            |             |             |      |                                       |          |      |      |     |    |                       |
| 45 |                            |             |             |      |                                       |          |      |      |     |    |                       |
| 46 |                            |             |             |      |                                       |          |      |      |     |    |                       |

|    |                            |                     |         |       |                                  |          |      |      |     |   |                       |
|----|----------------------------|---------------------|---------|-------|----------------------------------|----------|------|------|-----|---|-----------------------|
| 1  | Fan YZ(49)                 | Luan                | China   | 79    | NA                               | Adult    | NA   | 79   | 10  | 5 | 2020/01/20-2020/02/20 |
| 2  |                            |                     |         |       |                                  |          |      |      |     |   |                       |
| 3  | Feaster Matt(50)           | California          | US      | 1093  | NA                               | Adult    | 35.5 | 631  | 97  | 0 | 2020/04-2020/05       |
| 4  |                            |                     |         |       |                                  |          |      |      |     |   |                       |
| 5  |                            |                     |         |       |                                  |          |      |      |     |   |                       |
| 6  | Feng XP(51)                | Jingzhou            | China   | 52    | Median:46y (30-63y)              | Adult    | 64.0 | 52   | 8   | 0 | 2020/01/23-2020/03/08 |
| 7  |                            |                     |         |       |                                  |          |      |      |     |   |                       |
| 8  | Foster Catherine E.(52)    | Texas               | US      | 16544 | Median:7.1y(IQR:1.7-13.8y)       | Children | 51.4 | 1215 | 193 | 0 | 2020/03/10-2020/06/28 |
| 9  |                            |                     |         |       |                                  |          |      |      |     |   |                       |
| 10 |                            |                     |         |       |                                  |          |      |      |     |   |                       |
| 11 | Friederike Maechler(53)    | Berlin              | Germany | 5179  | Median:34y(24-67y)               | Adult    | 49.1 | 333  | 14  | 2 | 2020/03/03-2020/04/13 |
| 12 |                            |                     |         |       |                                  |          |      |      |     |   |                       |
| 13 | Gao HJ(54)                 | Ganzizhou           | China   | 54    | Mean:42.69y (±17.94)             | Adult    | 55.1 | 96   | 18  | 0 | till 2020/02/28       |
| 14 |                            |                     |         |       |                                  |          |      |      |     |   |                       |
| 15 |                            |                     |         |       |                                  |          |      |      |     |   |                       |
| 16 | Gao T(55)                  | Liaocheng, Xianyang | China   | 40    | Mean: 41y                        | Adult    | 48.0 | 40   | 4   | 1 | 2020/1/21-2020/2/16   |
| 17 |                            |                     |         |       |                                  |          |      |      |     |   |                       |
| 18 | Gautret P(56)              | NA                  | France  | 36    | Mean: 45.1y                      | Adult    | 42.0 | 36   | 6   | 0 | 2020/3/1-2020/3/16    |
| 19 |                            |                     |         |       |                                  |          |      |      |     |   |                       |
| 20 |                            |                     |         |       |                                  |          |      |      |     |   |                       |
| 21 | Gill Livingston(57)        | UK                  | UK      | 344   | Mean:75.3y (±8.2)                | Adult    | 48.0 | 131  | 16  | 0 | 2020/03/01-2020/04/30 |
| 22 |                            |                     |         |       |                                  |          |      |      |     |   |                       |
| 23 | Grados Isabel Zumalave(58) | Callao              | Peru    | 671   | Mean:27.2y (range:14-45y)        | Pregnant | 0.0  | 317  | 303 | 0 | 2020/05/01-2020/07/31 |
| 24 |                            |                     |         |       |                                  |          |      |      |     |   |                       |
| 25 |                            |                     |         |       |                                  |          |      |      |     |   |                       |
| 26 | Graham N.S.N.(59)          | London              | UK      | 313   | NA                               | Adult    | NA   | 180  | 54  | 0 | 2020/03-2020/04/09    |
| 27 |                            |                     |         |       |                                  |          |      |      |     |   |                       |
| 28 | Grechukhina Olga(60)       | New Haven           | US      | 1567  | Median:30y (IQR:25-34y)          | Pregnant | 0.0  | 141  | 44  | 0 | 2020/03/03-2020/05/11 |
| 29 |                            |                     |         |       |                                  |          |      |      |     |   |                       |
| 30 |                            |                     |         |       |                                  |          |      |      |     |   |                       |
| 31 | Gu. Kim(61)                | Daegu               | Korea   | 213   | NA                               | Adult    | NA   | 213  | 41  | 0 | NA                    |
| 32 |                            |                     |         |       |                                  |          |      |      |     |   |                       |
| 33 | Guo CX(62)                 | mainland China      | China   | 341   | Median:7y (4 days to 14 years)   | Children | 53.7 | 341  | 20  | 0 | 2020/1/15-2020/3/15   |
| 34 |                            |                     |         |       |                                  |          |      |      |     |   |                       |
| 35 |                            |                     |         |       |                                  |          |      |      |     |   |                       |
| 36 | Han RD(63)                 | Haozhou             | China   | 108   | Median:42y (range: 5-86y)        | Adult    | 48.2 | 108  | 17  | 0 | 2020/01/21-2020/03/05 |
| 37 |                            |                     |         |       |                                  |          |      |      |     |   |                       |
| 38 | He M(64)                   | Beijing             | China   | 35    | Mean: 7.1y (±4.2; range:0.5-15y) | Children | 51.4 | 35   | 4   | 0 | 2020/01-2020/06       |
| 39 |                            |                     |         |       |                                  |          |      |      |     |   |                       |
| 40 |                            |                     |         |       |                                  |          |      |      |     |   |                       |
| 41 | He WB(65)                  | Zhuzhou             | China   | 101   | Range: 3-88y                     | Adult    | 47.5 | 101  | 21  | 0 | 2020/01/01-2020/05/15 |
| 42 |                            |                     |         |       |                                  |          |      |      |     |   |                       |
| 43 |                            |                     |         |       |                                  |          |      |      |     |   |                       |
| 44 |                            |                     |         |       |                                  |          |      |      |     |   |                       |
| 45 |                            |                     |         |       |                                  |          |      |      |     |   |                       |
| 46 |                            |                     |         |       |                                  |          |      |      |     |   |                       |

|    |                        |                                                     |             |       |                               |          |      |       |      |   |                       |
|----|------------------------|-----------------------------------------------------|-------------|-------|-------------------------------|----------|------|-------|------|---|-----------------------|
| 1  | Hu SX(66)              | Hunan                                               | China       | 888   | Median: 35y (2-88y)           | Adult    | 44.4 | 888   | 36   | 0 | 2020/01/01-2020/02/08 |
| 2  |                        |                                                     |             |       |                               |          |      |       |      |   |                       |
| 3  | Huang DD(67)           | Chongqing                                           | China       | 89    | Median: 48.2y ( $\pm 17.9$ )  | Adult    | 58.0 | 89    | 6    | 0 | 2020/01/22-2020/02/17 |
| 4  |                        |                                                     |             |       |                               |          |      |       |      |   |                       |
| 5  |                        |                                                     |             |       |                               |          |      |       |      |   |                       |
| 6  | IH Huerta Saenz(68)    | Lima                                                | Peru        | 41    | Mean:32.3y                    | Pregnant | 0.0  | 41    | 28   | 0 | 2020/03/24-2020/05/07 |
| 7  |                        |                                                     |             |       |                               |          |      |       |      |   |                       |
| 8  | Ipekci A(69)           | Istanbul                                            | Turkey      | 87    | Mean: 51.27y( $\pm 6.45$ )    | Adult    | 72.5 | 51    | 4    | 0 | 2020/03/20-2020/04/01 |
| 9  |                        |                                                     |             |       |                               |          |      |       |      |   |                       |
| 10 |                        |                                                     |             |       |                               |          |      |       |      |   |                       |
| 11 | Irene Petersen(70)     | UK                                                  | UK          | 36061 | NA                            | Adult    | NA   | 115   | 88   | 0 | 2020/04/26-2020/06/27 |
| 12 |                        |                                                     |             |       |                               |          |      |       |      |   |                       |
| 13 | Jennifer S. Singer(71) | LA                                                  | US          | 4751  | Median:58y                    | Adult    | 50.0 | 18    | 10   | 0 | 2020/04/07-2020/05/21 |
| 14 |                        |                                                     |             |       |                               |          |      |       |      |   |                       |
| 15 |                        |                                                     |             |       |                               |          |      |       |      |   |                       |
| 16 | Jeong SJ(72)           | Seoul                                               | South Korea | 234   | Mean: 37.78y ( $\pm 15.57$ )  | Adult    | 39.7 | 234   | 66   | 0 | 2020/03/15-2020/04/10 |
| 17 |                        |                                                     |             |       |                               |          |      |       |      |   |                       |
| 18 | Jha S(73)              | NA                                                  | India       | 3667  | IQR: 18-40y                   | Adult    | 52.1 | 20    | 10   | 0 | 2020/03/23-2020/04/30 |
| 19 |                        |                                                     |             |       |                               |          |      |       |      |   |                       |
| 20 |                        |                                                     |             |       |                               |          |      |       |      |   |                       |
| 21 | Ji GH(74)              | Jingzhou                                            | China       | 45    | Mean: 45.4y(range: 21-67y)    | Adult    | 60.0 | 45    | 3    | 0 | 2020/1/19-2020/2/1    |
| 22 |                        |                                                     |             |       |                               |          |      |       |      |   |                       |
| 23 | Ji T(75)               | Huangshi, Wuhan                                     | China       | 51021 | NA                            | Adult    | NA   | 51021 | 50   | 0 | 2020/01/10-2020/03/27 |
| 24 |                        |                                                     |             |       |                               |          |      |       |      |   |                       |
| 25 |                        |                                                     |             |       |                               |          |      |       |      |   |                       |
| 26 | Jia CY(76)             | Beijing                                             | China       | 60    | Median: 59.5y (28-91y)        | Adult    | 40.0 | 60    | 1    | 0 | 2020/01/20-2020/02/20 |
| 27 |                        |                                                     |             |       |                               |          |      |       |      |   |                       |
| 28 | Jiang CH(77)           | Wuhan                                               | China       | 214   | Median:51y(range: 11-82y)     | Adult    | 40.0 | 214   | 26   | 0 | 2020/02/05-2020/03/10 |
| 29 |                        |                                                     |             |       |                               |          |      |       |      |   |                       |
| 30 |                        |                                                     |             |       |                               |          |      |       |      |   |                       |
| 31 | Jiang R(78)            | Guangzhou                                           | China       | 25    | Mean: 44.2y (range:12-86y)    | Adult    | 44.0 | 25    | 1    | 0 | 2020/01/25-2020/03/25 |
| 32 |                        |                                                     |             |       |                               |          |      |       |      |   |                       |
| 33 | Jibrin YB(79)          | Bauchi                                              | Nigeria     | 84    | Mean: 41.0y( $\pm 10.5$ )     | Adult    | 72.0 | 84    | 49   | 0 | 2020/03/01-2020/06/30 |
| 34 |                        |                                                     |             |       |                               |          |      |       |      |   |                       |
| 35 |                        |                                                     |             |       |                               |          |      |       |      |   |                       |
| 36 | Jin MH(80)             | Huzhou                                              | China       | 10    | Median: 32y (range: 0.58-56y) | Adult    | 50.0 | 10    | 1    | 0 | 2020/01/25-2020/02/07 |
| 37 |                        |                                                     |             |       |                               |          |      |       |      |   |                       |
| 38 | Jung CY(81)            | South Korea                                         | South Korea | 10237 | Mean: 45y ( $\pm 19.8$ )      | Adult    | 39.9 | 10237 | 6350 | 0 | 2020/01/24-2020/04/09 |
| 39 |                        |                                                     |             |       |                               |          |      |       |      |   |                       |
| 40 |                        |                                                     |             |       |                               |          |      |       |      |   |                       |
| 41 | Kang M(82)             | Shenzhen, Guangzhou,<br>Foshan, Yangjiang, Shaoguan | China       | 37    | Median: 58y (range:10-78y)    | Adult    | 49.0 | 37    | 2    | 0 | 2020/01/12-2020/01/23 |
| 42 |                        |                                                     |             |       |                               |          |      |       |      |   |                       |
| 43 |                        |                                                     |             |       |                               |          |      |       |      |   |                       |
| 44 |                        |                                                     |             |       |                               |          |      |       |      |   |                       |
| 45 |                        |                                                     |             |       |                               |          |      |       |      |   |                       |
| 46 |                        |                                                     |             |       |                               |          |      |       |      |   |                       |

|    |                       |                                        |             |       |                                  |          |      |       |       |     |                       |
|----|-----------------------|----------------------------------------|-------------|-------|----------------------------------|----------|------|-------|-------|-----|-----------------------|
| 1  | Kasper MR(83)         | Theodore Roosevelt aircraft carrier    | US          | 4779  | Mean: 27y                        | Adult    | 78.3 | 1331  | 572   | 0   | 2020/03/23-2020/05/18 |
| 2  |                       |                                        |             |       |                                  |          |      |       |       |     |                       |
| 3  | Ke B(84)              | Chongqing                              | China       | 25    | Median: 11.0y (range: 0.6-17y)   | Children | 56.0 | 25    | 8     | 0   | 2020/1/19-2020/3/12   |
| 4  |                       |                                        |             |       |                                  |          |      |       |       |     |                       |
| 5  |                       |                                        |             |       |                                  |          |      |       |       |     |                       |
| 6  | Kenu E(85)            | NA                                     | Ghana       | 17736 | Median:33y (IQR: 0.1-85y)        | Adult    | 57.8 | 17763 | 14242 | 0   | 2020/03/12-2020/06/30 |
| 7  |                       |                                        |             |       |                                  |          |      |       |       |     |                       |
| 8  |                       | Seoul, Goyang, Siheung,                |             |       |                                  |          |      |       |       |     |                       |
| 9  |                       | Bucheon, Gwangju, Suwon,               |             |       |                                  |          |      |       |       |     |                       |
| 10 | Ki M(86)              | Incheon, Pyeongtaek,                   | South Korea | 28    | Median: 42y (range: 20-73y)      | Adult    | 54.0 | 28    | 3     | 0   | 2020/01/20-2020/02/10 |
| 11 |                       | Gunsan, Guri, Naju,                    |             |       |                                  |          |      |       |       |     |                       |
| 12 |                       | Evacuated from Wuhan                   |             |       |                                  |          |      |       |       |     |                       |
| 13 |                       |                                        |             |       |                                  |          |      |       |       |     |                       |
| 14 |                       |                                        |             |       |                                  |          |      |       |       |     |                       |
| 15 | Kirenga Bruce(87)     | Entebbe                                | Uganda      | 56    | Mean:34.2y (±15.5; range:25-43y) | Adult    | 67.9 | 56    | 32    | 0   | till 16 May 2020      |
| 16 |                       |                                        |             |       |                                  |          |      |       |       |     |                       |
| 17 | Kong WF(88)           | Sichuan                                | China       | 511   | Range:1 month to 87 years        | Adult    | 55.0 | 511   | 100   | 0   | 2020/01/25-2020/02/20 |
| 18 |                       |                                        |             |       |                                  |          |      |       |       |     |                       |
| 19 |                       |                                        |             |       |                                  |          |      |       |       |     |                       |
| 20 | Krajcar N(89)         | NA                                     | Croatia     | 289   | Median:10y (IQR: 4.6-15.7y)      | Children | 43.1 | 230   | 95    | 0   | 2020/03/12-2020/07/19 |
| 21 |                       |                                        |             |       |                                  |          |      |       |       |     |                       |
| 22 | Kristin J. Meyers(90) | Indianapolis Metropolitan              | US          | 2953  | Mean:48.1y (±16.3)               | Adult    | 36.3 | 91    | 81    | 23  | 2020/04/07-2020/05/16 |
| 23 |                       |                                        |             |       |                                  |          |      |       |       |     |                       |
| 24 |                       |                                        |             |       |                                  |          |      |       |       |     |                       |
| 25 | Kumar R(91)           | New Delhi                              | India       | 231   | Mean: 39.8y(±13.6)               | Adult    | 78.3 | 231   | 108   | 0   | 2020/03/20-2020/04/30 |
| 26 |                       |                                        |             |       |                                  |          |      |       |       |     |                       |
| 27 | Ladhani Shamez N(92)  | London                                 | UK          | 264   | Median:47y(IQR:35-56y)           | Adult    | 21.9 | 105   | 67    | 21  | 2020/04/10-2020/04/13 |
| 28 |                       |                                        |             |       |                                  |          |      |       |       |     |                       |
| 29 |                       |                                        |             |       |                                  |          |      |       |       |     |                       |
| 30 | Lai XQ(93)            | Wuhan                                  | China       | 110   | Median: 36.5y (30.0-47.0y)       | Adult    | 28.0 | 110   | 3     | 0   | 2020/1/1-2020/2/9     |
| 31 |                       |                                        |             |       |                                  |          |      |       |       |     |                       |
| 32 | Le TQM(94)            | Vinh Phuc Province, Thanh Hoa Province | Vietnam     | 12    | Median: 30y (range: 0.25-55y)    | Adult    | 33.0 | 12    | 1     | 0   | 2020/01/21-2020/01/27 |
| 33 |                       |                                        |             |       |                                  |          |      |       |       |     |                       |
| 34 |                       |                                        |             |       |                                  |          |      |       |       |     |                       |
| 35 | Lee YH(95)            | Daegu                                  | South Korea | 632   | Mean: 40.6y (±17.3)              | Adult    | 32.0 | 632   | 557   | 186 | 2020/03/02-2020/04/30 |
| 36 |                       |                                        |             |       |                                  |          |      |       |       |     |                       |
| 37 | Lei MY(96)            | Guizhou                                | China       | 146   | NA                               | Adult    | NA   | 146   | 25    | 0   | 2020/01/21-2020/03/10 |
| 38 |                       |                                        |             |       |                                  |          |      |       |       |     |                       |
| 39 |                       |                                        |             |       |                                  |          |      |       |       |     |                       |
| 40 | Lewis Megan(97)       | Texas                                  | Mexico      | 231   | Median:22y (range:19-62y)        | Adult    | 55.0 | 64    | 14    | 0   | 2020/03/26-2020/04/05 |
| 41 |                       |                                        |             |       |                                  |          |      |       |       |     |                       |
| 42 |                       |                                        |             |       |                                  |          |      |       |       |     |                       |
| 43 |                       |                                        |             |       |                                  |          |      |       |       |     |                       |
| 44 |                       |                                        |             |       |                                  |          |      |       |       |     |                       |
| 45 |                       |                                        |             |       |                                  |          |      |       |       |     |                       |
| 46 |                       |                                        |             |       |                                  |          |      |       |       |     |                       |



|    |              |          |           |     |                                 |          |      |     |    |   |                       |
|----|--------------|----------|-----------|-----|---------------------------------|----------|------|-----|----|---|-----------------------|
| 1  | Li CY(98)    | Xuzhou   | China     | 7   | Median: 42y (range: 21-62y)     | Adult    | 57.0 | 7   | 1  | 0 | 2020/01/25-2020/01/31 |
| 2  |              |          |           |     |                                 |          |      |     |    |   |                       |
| 3  | Li J(99)     | NA       | Singapore | 39  | NA                              | Children | 60.0 | 39  | 15 | 0 | 2020/01-2020/05       |
| 4  |              |          |           |     |                                 |          |      |     |    |   |                       |
| 5  |              |          |           |     |                                 |          |      |     |    |   |                       |
| 6  | Li W(100)    | Zhuhai   | China     | 5   | Median: 3y (1.4-6y)             | Children | 80.0 | 5   | 4  | 0 | 2020/01/28-2020/02/08 |
| 7  |              |          |           |     |                                 |          |      |     |    |   |                       |
| 8  | Li Y(101)    | Wuhan    | China     | 53  | Mean: 58y (range: 26-83)        | Adult    | 55.0 | 51  | 1  | 0 | 2020/01/23-2020/01-29 |
| 9  |              |          |           |     |                                 |          |      |     |    |   |                       |
| 10 |              |          |           |     |                                 |          |      |     |    |   |                       |
| 11 | Li Y(102)    | Wuhan    | China     | 127 | Median: 6y(range:0.17-15y)      | Children | 57.0 | 127 | 21 | 0 | 2020/1/28-2020/3/12   |
| 12 |              |          |           |     |                                 |          |      |     |    |   |                       |
| 13 | Li YL(103)   | Hubei    | China     | 252 | Median:46y(range: 8-65y)        | Adult    | 49.6 | 252 | 74 | 0 | 2020/02/22-2020/03/08 |
| 14 |              |          |           |     |                                 |          |      |     |    |   |                       |
| 15 |              |          |           |     |                                 |          |      |     |    |   |                       |
| 16 | Liao XN(104) | wuhan    | China     | 42  | Median:51.6y (22-69y)           | Adult    | 69.0 | 42  | 5  | 0 | 2020/01/16-2020/02/18 |
| 17 |              |          |           |     |                                 |          |      |     |    |   |                       |
| 18 | Lin S(105)   | Shanghai | China     | 161 | Median:45y(range:1-84y)         | Adult    | 49.7 | 161 | 6  | 0 | till 2020/02/17       |
| 19 |              |          |           |     |                                 |          |      |     |    |   |                       |
| 20 |              |          |           |     |                                 |          |      |     |    |   |                       |
| 21 | Lin XM(106)  | Zhaoqing | China     | 23  | Range: 3-65y                    | Adult    | 56.5 | 23  | 4  | 0 | 2020/01/23-2020/05/06 |
| 22 |              |          |           |     |                                 |          |      |     |    |   |                       |
| 23 | Lin ZF(107)  | Yichang  | China     | 205 | Median: 56.0y (range: 1.25-88y) | Adult    | 55.0 | 205 | 15 | 0 | 2020/01/24-2020/03/09 |
| 24 |              |          |           |     |                                 |          |      |     |    |   |                       |
| 25 |              |          |           |     |                                 |          |      |     |    |   |                       |
| 26 | Liu B(108)   | Shunde   | China     | 9   | Range: 21-61y                   | Adult    | 44.4 | 9   | 2  | 0 | 2020/01/22-2020/02/20 |
| 27 |              |          |           |     |                                 |          |      |     |    |   |                       |
| 28 | Liu BM(109)  | Wuhan    | China     | 68  | Mean: 44.3y (±16.4)             | Adult    | 37.0 | 68  | 36 | 0 | 2020/2/7-2020/3/26    |
| 29 |              |          |           |     |                                 |          |      |     |    |   |                       |
| 30 |              |          |           |     |                                 |          |      |     |    |   |                       |
| 31 | Liu BY(110)  | Zhejiang | China     | 91  | Mean: 33.66y (range: 7-73y)     | Adult    | 53.0 | 91  | 43 | 0 | 2020/03/01-2020/04/07 |
| 32 |              |          |           |     |                                 |          |      |     |    |   |                       |
| 33 | Liu DH(111)  | Wuhan    | China     | 15  | Mean: 32y (range:23-40y)        | Pregnant | 0.0  | 15  | 2  | 0 | 2020/01/20-2020/02/10 |
| 34 |              |          |           |     |                                 |          |      |     |    |   |                       |
| 35 |              |          |           |     |                                 |          |      |     |    |   |                       |
| 36 | Liu F(112)   | Hangzhou | China     | 10  | Median: 42y (34-50y)            | Adult    | 40.0 | 10  | 1  | 0 | 2020/01/22-2020/02/22 |
| 37 |              |          |           |     |                                 |          |      |     |    |   |                       |
| 38 | Liu F(113)   | Wuhan    | China     | 44  | Mean: 30y (range:22-43y)        | Pregnant | 0.0  | 16  | 7  | 0 | 2020/01/11-2020/02/13 |
| 39 |              |          |           |     |                                 |          |      |     |    |   |                       |
| 40 |              |          |           |     |                                 |          |      |     |    |   |                       |
| 41 | Liu GT(114)  | Ningxia  | China     | 70  | Mean: 40y (range: 3-77y)        | Adult    | 53.0 | 70  | 10 | 0 | 2020/01/22-2020/02/17 |
| 42 |              |          |           |     |                                 |          |      |     |    |   |                       |
| 43 |              |          |           |     |                                 |          |      |     |    |   |                       |
| 44 |              |          |           |     |                                 |          |      |     |    |   |                       |
| 45 |              |          |           |     |                                 |          |      |     |    |   |                       |
| 46 |              |          |           |     |                                 |          |      |     |    |   |                       |

|    |                  |                              |       |      |                                  |          |      |     |    |    |                       |
|----|------------------|------------------------------|-------|------|----------------------------------|----------|------|-----|----|----|-----------------------|
| 1  | Liu MQ(115)      | Chongqing                    | China | 5    | Median: 5.2y (range: 0.58-13y)   | Children | 60.0 | 5   | 3  | 0  | NA                    |
| 2  |                  |                              |       |      |                                  |          |      |     |    |    |                       |
| 3  | Liu X(116)       | Chenzhou                     | China | 5    | Mean: 30y (range:2.5-56y)        | Adult    | 40.0 | 5   | 1  | 0  | 2020/01/31-2020/02/06 |
| 4  |                  |                              |       |      |                                  |          |      |     |    |    |                       |
| 5  | Liu XX(117)      | Hefei                        | China | 105  | Median: 45y (range: 21-87 years) | Adult    | 0.0  | 105 | 24 | 0  | till 2020/03/06       |
| 6  |                  |                              |       |      |                                  |          |      |     |    |    |                       |
| 7  |                  |                              |       |      |                                  |          |      |     |    |    |                       |
| 8  |                  | Hefei                        | China | 7    | Median: 10y (range: 5-10y)       | Children | NA   | 7   | 4  | 0  | till 2020/03/06       |
| 9  |                  |                              |       |      |                                  |          |      |     |    |    |                       |
| 10 |                  | Hubei, Fujian, Shanxi,       |       |      |                                  |          |      |     |    |    |                       |
| 11 | Liu YL(118)      | Beijing, Guangdong, Jiangxi, | China | 12   | Median: 30y (22-36)              | Pregnant | 0.0  | 13  | 1  | 0  | 2019/12/08-2020/02/25 |
| 12 |                  | Heilongjiang, Anhui          |       |      |                                  |          |      |     |    |    |                       |
| 13 |                  |                              |       |      |                                  |          |      |     |    |    |                       |
| 14 | Liu YX(119)      | Shenzhen                     | China | 12   | Median: 62.5y (range: 10-72y)    | Adult    | 67.0 | 12  | 1  | 0  | 2020/01/11-2020/01/20 |
| 15 |                  |                              |       |      |                                  |          |      |     |    |    |                       |
| 16 |                  |                              |       |      |                                  |          |      |     |    |    |                       |
| 17 | Liu ZR(120)      | Anhui                        | China | 15   | Median: 42y (range:14-84y)       | Adult    | 47.0 | 15  | 2  | 0  | 2020/02/04-2020/02/12 |
| 18 |                  |                              |       |      |                                  |          |      |     |    |    |                       |
| 19 |                  |                              |       |      |                                  |          |      |     |    |    |                       |
| 20 | Lu RF(121)       | Nantong                      | China | 28   | Median: 50y (range: 26-73y)      | Adult    | 61.0 | 28  | 1  | 0  | 2020/1/23-2020/2/26   |
| 21 |                  |                              |       |      |                                  |          |      |     |    |    |                       |
| 22 | Lu XX(122)       | Wuhan                        | China | 1391 | Median: 6.7y (range: 0-15y)      | Children | 61.0 | 171 | 27 | 0  | 2020/01/28-2020/02/26 |
| 23 |                  |                              |       |      |                                  |          |      |     |    |    |                       |
| 24 |                  |                              |       |      |                                  |          |      |     |    |    |                       |
| 25 | Lu Y(123)        | Guangzhou                    | China | 9    | Mean: 7.8y (range: 0.17-15y)     | Children | 56.0 | 9   | 1  | 0  | 2020/1/22-2020/2/9    |
| 26 |                  |                              |       |      |                                  |          |      |     |    |    |                       |
| 27 | Lucy Rivett(124) | UK                           | UK    | 1270 | NA                               | Adult    | 0.0  | 61  | 31 | 24 | 2020/04/06-2020/04/24 |
| 28 |                  |                              |       |      |                                  |          |      |     |    |    |                       |
| 29 |                  |                              |       |      |                                  |          |      |     |    |    |                       |
| 30 | Luo SH(125)      | Anqing                       | China | 83   | NA                               | Adult    | NA   | 83  | 8  | 7  | till 2020/02/21       |
| 31 |                  |                              |       |      |                                  |          |      |     |    |    |                       |
| 32 | M.M. Arons(126)  | King County                  | US    | 76   | Mean: 78.6y ( $\pm 9.5$ )        | Adult    | NA   | 48  | 27 | 24 | 2020/3/3-2020/3/26    |
| 33 |                  |                              |       |      |                                  |          |      |     |    |    |                       |
| 34 |                  |                              |       |      |                                  |          |      |     |    |    |                       |
| 35 | Ma MM(127)       | Guangzhou                    | China | 347  | Median: 48y                      | Adult    | 49.8 | 361 | 14 | 0  | till 2020/03/11       |
| 36 |                  |                              |       |      |                                  |          |      |     |    |    |                       |
| 37 | Ma Y(128)        | Jinan                        | China | 47   | Median: 34y (range: 1-72y)       | Adult    | 43.0 | 47  | 11 | 0  | 2020/1/23-2020/3/10   |
| 38 |                  |                              |       |      |                                  |          |      |     |    |    |                       |
| 39 |                  |                              |       |      |                                  |          |      |     |    |    |                       |
| 40 | Ma YL(129)       | Wuhan                        | China | 115  | Range: 1.67-5y                   | Children | 64.0 | 115 | 61 | 0  | NA                    |
| 41 |                  |                              |       |      |                                  |          |      |     |    |    |                       |
| 42 |                  |                              |       |      |                                  |          |      |     |    |    |                       |
| 43 |                  |                              |       |      |                                  |          |      |     |    |    |                       |
| 44 |                  |                              |       |      |                                  |          |      |     |    |    |                       |
| 45 |                  |                              |       |      |                                  |          |      |     |    |    |                       |
| 46 |                  |                              |       |      |                                  |          |      |     |    |    |                       |

|    |                         |                                    |             |       |                                   |          |      |      |     |   |                       |
|----|-------------------------|------------------------------------|-------------|-------|-----------------------------------|----------|------|------|-----|---|-----------------------|
| 1  | MacIntyre CR(130)       | NA                                 | Japan       | 565   | NA                                | Adult    | NA   | 8    | 5   | 0 | 2020/01/29-2020/01/31 |
| 2  |                         |                                    |             |       |                                   |          |      |      |     |   |                       |
| 3  | Mahesh C. Patel(131)    | DuPage, Illinois                   | US          | 126   | Median:82y(IQR:75-92y)            | Adult    | 31.0 | 35   | 13  | 0 | 2020/03/11-2020/03/15 |
| 4  |                         |                                    |             |       |                                   |          |      |      |     |   |                       |
| 5  | Martin C(132)           | Brussels                           | Belgium     | 326   | Mean: 36y (range: 21-59y)         | Adult    | 24.0 | 41   | 31  | 0 | 2020/04/15-2020/05/18 |
| 6  |                         |                                    |             |       |                                   |          |      |      |     |   |                       |
| 7  | Maru Sheela(133)        | New York                           | US          | 124   | Mean: 30.2y                       | Pregnant | 0.0  | 46   | 33  | 0 | 2020/03/29-2020/04/22 |
| 8  |                         |                                    |             |       |                                   |          |      |      |     |   |                       |
| 9  | McMichael TM(134)       | King County                        | US          | 167   | Median: 72y (range: 21-100y)      | Adult    | 33.0 | 167  | 7   | 0 | 2020/02/28-2020/03/18 |
| 10 |                         |                                    |             |       |                                   |          |      |      |     |   |                       |
| 11 | Mei X(135)              | Shanghai                           | China       | 494   | Median:40y(6-88y)                 | Adult    | 53.8 | 494  | 39  | 8 | 2020/01/20-2020/03/31 |
| 12 |                         |                                    |             |       |                                   |          |      |      |     |   |                       |
| 13 | Michael J. Fassett(136) | Southern California                | US          | 3923  | Mean: 31.2y (±5.29)               | Pregnant | 0.0  | 17   | 17  | 1 | 2020/04/06-2020/05/11 |
| 14 |                         |                                    |             |       |                                   |          |      |      |     |   |                       |
| 15 | Michel Bielecki(137)    | Swiss Army Base in Airolo          | Switzerland | 508   | Median: 21y (18-28y)              | Adult    | 92.0 | 228  | 126 | 0 | 2020/3/11-2020/5/3    |
| 16 |                         |                                    |             |       |                                   |          |      |      |     |   |                       |
| 17 | Miyamae Y(138)          | Tokyo                              | Japan       | 23    | Median: 67y (29-79y)              | Adult    | 43.0 | 23   | 15  | 0 | 2020/02/18-2020/02/25 |
| 18 |                         |                                    |             |       |                                   |          |      |      |     |   |                       |
| 19 | Mohammed A M Ahmed(139) | Somalia                            | Somalia     | 182   | Mean: 22y (±4)                    | Adult    | 66.0 | 49   | 16  | 0 | 2020/4/23-2020/5/7    |
| 20 |                         |                                    |             |       |                                   |          |      |      |     |   |                       |
| 21 | Moon SS(140)            | Gyeongsangbuk-do                   | South Korea | 352   | Mean: 56 y (range: 14–95y)        | Adult    | 40.9 | 352  | 81  | 0 | 2020/02/18-2020/06/30 |
| 22 |                         |                                    |             |       |                                   |          |      |      |     |   |                       |
| 23 | Moriarty LF(141)        | Yokohama                           | Japan       | 3711  | Range: 29-73y                     | Adult    | 55.0 | 712  | 331 | 0 | 2020/02/05-2020/02/20 |
| 24 |                         |                                    |             |       |                                   |          |      |      |     |   |                       |
| 25 | Nagler AR(142)          | Long Island, Brooklyn, Long Island | US          | 14746 | NA                                | Adult    | NA   | 1905 | 536 | 0 | 2020/03/25-2020/05/18 |
| 26 |                         |                                    |             |       |                                   |          |      |      |     |   |                       |
| 27 | Niccolò Parri(143)      | Italy                              | Italy       | 170   | Median:3.75y (IQR:4 months-10.7y) | Children | 56.0 | 170  | 29  | 0 | 2020/03/02-2020/05/02 |
| 28 |                         |                                    |             |       |                                   |          |      |      |     |   |                       |
| 29 | Niu YL(144)             | Suqian                             | China       | 13    | Mean: 32.3y (range: 12-48y)       | Adult    | 46.0 | 13   | 3   | 0 | 2020/01/25-2020/03/03 |
| 30 |                         |                                    |             |       |                                   |          |      |      |     |   |                       |
| 31 | Oduro-Mensah E(145)     | NA                                 | Ghana       | 275   | Mean: 40.7y±16.4                  | Adult    | 54.5 | 275  | 142 | 0 | 2020/03-2020/05       |
| 32 |                         |                                    |             |       |                                   |          |      |      |     |   |                       |
| 33 | Ou JM(146)              | Fujian                             | China       | 298   | Median: 42y (range: 0.42-93y)     | Adult    | 55.0 | 298  | 3   | 0 | till 2020/02/21       |
| 34 |                         |                                    |             |       |                                   |          |      |      |     |   |                       |
| 35 |                         |                                    |             |       |                                   |          |      |      |     |   |                       |
| 36 |                         |                                    |             |       |                                   |          |      |      |     |   |                       |
| 37 |                         |                                    |             |       |                                   |          |      |      |     |   |                       |
| 38 |                         |                                    |             |       |                                   |          |      |      |     |   |                       |
| 39 |                         |                                    |             |       |                                   |          |      |      |     |   |                       |
| 40 |                         |                                    |             |       |                                   |          |      |      |     |   |                       |
| 41 |                         |                                    |             |       |                                   |          |      |      |     |   |                       |
| 42 |                         |                                    |             |       |                                   |          |      |      |     |   |                       |
| 43 |                         |                                    |             |       |                                   |          |      |      |     |   |                       |
| 44 |                         |                                    |             |       |                                   |          |      |      |     |   |                       |
| 45 |                         |                                    |             |       |                                   |          |      |      |     |   |                       |
| 46 |                         |                                    |             |       |                                   |          |      |      |     |   |                       |

|    |                       |           |                           |       |                                           |          |      |     |     |   |                       |
|----|-----------------------|-----------|---------------------------|-------|-------------------------------------------|----------|------|-----|-----|---|-----------------------|
| 1  | Pan XQ(147)           | Wenzhou   | China                     | 64    | Mean: 48.8y ( $\pm 12.9$ )                | Adult    | 61.0 | 64  | 6   | 0 | 2020/02/05-2020/02/20 |
| 2  |                       |           |                           |       |                                           |          |      |     |     |   |                       |
| 3  | Pérez-GarcíaF(148)    | Madrid    | Spain                     | 2963  | NA                                        | Adult    | 24.7 | 884 | 345 | 0 | 2020/03-2020/05       |
| 4  |                       |           |                           |       |                                           |          |      |     |     |   |                       |
| 5  |                       |           |                           |       |                                           |          |      |     |     |   |                       |
| 6  | Pongpirul W(149)      | NA        | Thailand                  | 193   | Median: 37y (IQR: 29–53y)                 | Adult    | 58.5 | 193 | 13  | 3 | 2020/01/08-2020/04/16 |
| 7  |                       |           |                           |       |                                           |          |      |     |     |   |                       |
| 8  | Pongpirul WA(150)     | Bangkok   | Tailand                   | 11    | Median: 61y (range: 28-74y)               | Adult    | 55.0 | 11  | 1   | 0 | 2020/01/08-2020/01/31 |
| 9  |                       |           |                           |       |                                           |          |      |     |     |   |                       |
| 10 |                       |           |                           |       |                                           |          |      |     |     |   |                       |
| 11 | Qiu CF(151)           | Hunan     | China                     | 104   | Mean:43y ( $\pm 7.54$ )                   | Adult    | 47.1 | 104 | 5   | 0 | 2020/01/22-2020/02/12 |
| 12 |                       |           |                           |       |                                           |          |      |     |     |   |                       |
| 13 | Redditt V(152)        | Toronto   | Canada                    | 60    | Mean: 36.0y( $\pm 10.0$ )                 | Adult    | 80.0 | 25  | 7   | 3 | 2020/4/20             |
| 14 |                       |           |                           |       |                                           |          |      |     |     |   |                       |
| 15 |                       |           |                           |       |                                           |          |      |     |     |   |                       |
| 16 | Roman G. Shmakov(153) | Moscow    | Russia                    | 66    | Mean:30.3y ( $\pm 6.25$ )                 | Pregnant | 0.0  | 66  | 15  | 0 | NA                    |
| 17 |                       |           |                           |       |                                           |          |      |     |     |   |                       |
| 18 | Rubbi I(154)          | Ravenna   | Italy                     | 93    | Mean: 45.96y $\pm 10.71$                  | Adult    | 29.0 | 93  | 9   | 0 | 2020/03/25-2020/05/05 |
| 19 |                       |           |                           |       |                                           |          |      |     |     |   |                       |
| 20 |                       |           |                           |       |                                           |          |      |     |     |   |                       |
| 21 | Salim Mattar(155)     | Colombia  | US                        | 686   | Mean:43y (range:1-95y)                    | Adult    | NA   | 35  | 18  | 0 | 2020/04/09-2020/05/16 |
| 22 |                       |           |                           |       |                                           |          |      |     |     |   |                       |
| 23 | Seong Eun Kim(156)    | NA        | Korea                     | 71    | Median: 31y (17.8-55.8y)                  | Adult    | 46.0 | 71  | 13  | 3 | NA                    |
| 24 |                       |           |                           |       |                                           |          |      |     |     |   |                       |
| 25 |                       |           |                           |       |                                           |          |      |     |     |   |                       |
| 26 | Shaher M. Samrah(157) | Jordan    | Jordan                    | 81    | Mean:39.95y ( $\pm 16.59$ ; range:18-80y) | Adult    | 45.7 | 81  | 37  | 0 | 2020/03/17-2020/04/02 |
| 27 |                       |           |                           |       |                                           |          |      |     |     |   |                       |
| 28 | She X(158)            | Suining   | China                     | 9     | Mean: 29y (range: 24-35y)                 | Adult    | 33.0 | 9   | 1   | 0 | 2020/01/20-2020/02/12 |
| 29 |                       |           |                           |       |                                           |          |      |     |     |   |                       |
| 30 |                       |           |                           |       |                                           |          |      |     |     |   |                       |
| 31 | Son H(159)            | Busan     | South Korea               | 18303 | NA                                        | Adult    | 45.4 | 108 | 12  | 0 | 2020/02/21-2020/03/24 |
| 32 |                       |           |                           |       |                                           |          |      |     |     |   |                       |
| 33 |                       |           |                           |       |                                           |          |      |     |     |   |                       |
| 34 | Song W(160)           | Xiangyang | China                     | 16    | Median: 8.5y range:0.96-14y)              | Children | 63.0 | 16  | 8   | 0 | 2020/01/01-2020/03/17 |
| 35 |                       |           |                           |       |                                           |          |      |     |     |   |                       |
| 36 | Song YS(161)          | Zhengzhou | China                     | 17    | Mean:47y (range: 12-83y)                  | Adult    | 58.8 | 17  | 1   | 0 | 2020/02-2020/03       |
| 37 |                       |           |                           |       |                                           |          |      |     |     |   |                       |
| 38 |                       |           | Belgium, Finland, France, |       |                                           |          |      |     |     |   |                       |
| 39 | Spiteri G(162)        | NA        | Germany, Italy, Russia,   | 38    | Median: 42y (2-81y)                       | Adult    | 66.0 | 38  | 2   | 0 | 2020/01/17-2020/02/21 |
| 40 |                       |           | Spain,Sweden              |       |                                           |          |      |     |     |   |                       |
| 41 |                       |           |                           |       |                                           |          |      |     |     |   |                       |
| 42 |                       |           |                           |       |                                           |          |      |     |     |   |                       |
| 43 |                       |           |                           |       |                                           |          |      |     |     |   |                       |
| 44 |                       |           |                           |       |                                           |          |      |     |     |   |                       |
| 45 |                       |           |                           |       |                                           |          |      |     |     |   |                       |
| 46 |                       |           |                           |       |                                           |          |      |     |     |   |                       |

|    |                        |               |               |      |                                |          |      |      |     |   |                       |
|----|------------------------|---------------|---------------|------|--------------------------------|----------|------|------|-----|---|-----------------------|
| 1  | Sun DF(163)            | Jiaxing       | China         | 30   | Mean: 49y (range: 30-71y)      | Adult    | 50.0 | 30   | 1   | 0 | 2020/01/24-2020/02/06 |
| 2  |                        |               |               |      |                                |          |      |      |     |   |                       |
| 3  | Sun WW(164)            | Zhejiang      | China         | 391  | NA                             | Adult    | 41.0 | 391  | 54  | 0 | 2020/01/08-2020/02/06 |
| 4  |                        |               |               |      |                                |          |      |      |     |   |                       |
| 5  |                        |               |               |      |                                |          |      |      |     |   |                       |
| 6  | Sun Z(165)             | Anhui         | China         | 21   | Mean: 40.52y ( $\pm$ 17.14)    | Adult    | 52.0 | 21   | 4   | 0 | 2020/01/23-2020/03/08 |
| 7  |                        |               |               |      |                                |          |      |      |     |   |                       |
| 8  | Tang A(166)            | Zhoushan      | China         | 10   | Mean: 50.9y (range: 28-67y)    | Adult    | 70.0 | 10   | 5   | 5 | till 2020/02/17       |
| 9  |                        |               |               |      |                                |          |      |      |     |   |                       |
| 10 |                        |               |               |      |                                |          |      |      |     |   |                       |
| 11 | Tang Olive(167)        | Baltimore     | US            | 1970 | Median:73.9y (IQR:21.9-105.4y) | Adult    | 57.0 | 752  | 424 | 0 | 2020/03/01-2020/06/12 |
| 12 |                        |               |               |      |                                |          |      |      |     |   |                       |
| 13 | Thiel SL(168)          | NA            | Liechtenstein | 95   | Median: 39y (IQR: 28-56y)      | Adult    | 51.6 | 95   | 2   | 0 | 2020/03/02-2020/04/23 |
| 14 |                        |               |               |      |                                |          |      |      |     |   |                       |
| 15 |                        |               |               |      |                                |          |      |      |     |   |                       |
| 16 | Tian SC(169)           | Liaocheng     | China         | 37   | Mean:44.3y ( $\pm$ 1.67)       | Adult    | 45.9 | 37   | 7   | 0 | NA                    |
| 17 |                        |               |               |      |                                |          |      |      |     |   |                       |
| 18 | Tian SJ(170)           | Beijing       | China         | 262  | Median: 47.5y (range: 1-94y)   | Adult    | 49.0 | 262  | 13  | 0 | till 2020/02/10       |
| 19 |                        |               |               |      |                                |          |      |      |     |   |                       |
| 20 |                        |               |               |      |                                |          |      |      |     |   |                       |
| 21 | Timothy J. Judson(171) | San Francisco | US            | 1129 | NA                             | Adult    | NA   | 1129 | 315 | 0 | NA                    |
| 22 |                        |               |               |      |                                |          |      |      |     |   |                       |
| 23 | Tolia VM(172)          | San Diego     | US            | 283  | NA                             | Adult    | 53.0 | 29   | 2   | 0 | 2002/03/10-2020/03-19 |
| 24 |                        |               |               |      |                                |          |      |      |     |   |                       |
| 25 |                        |               |               |      |                                |          |      |      |     |   |                       |
| 26 | Tong H(173)            | Bengbu        | China         | 24   | Mean: 53y (range: 17-74y)      | Adult    | 63.0 | 24   | 4   | 0 | 2020/01/10-2020/02/15 |
| 27 |                        |               |               |      |                                |          |      |      |     |   |                       |
| 28 | Tong ZD(174)           | Zhoushan      | China         | 7    | Median: 28.5y (12-45y).        | Adult    | 43.0 | 7    | 3   | 0 | 2020/1/1              |
| 29 |                        |               |               |      |                                |          |      |      |     |   |                       |
| 30 |                        |               |               |      |                                |          |      |      |     |   |                       |
| 31 | Treibel TA(175)        | London        | UK            | 1523 | NA                             | Adult    | NA   | 1523 | 65  | 0 | since2020/3/23        |
| 32 |                        |               |               |      |                                |          |      |      |     |   |                       |
| 33 | Tsou Tsung-Pei(176)    | Taiwan        | China         | 100  | Median:44y(range:11-88y)       | Adult    | 44.0 | 100  | 10  | 0 | 2020/01/11-2020/03/16 |
| 34 |                        |               |               |      |                                |          |      |      |     |   |                       |
| 35 |                        |               |               |      |                                |          |      |      |     |   |                       |
| 36 | Viktoriya London(177)  | New York      | US            | 156  | Range:24.5-34.8y               | Pregnant | 0.0  | 68   | 22  | 0 | 2020/03/15-2020/04/15 |
| 37 |                        |               |               |      |                                |          |      |      |     |   |                       |
| 38 | Wan R(178)             | Hunan         | China         | 78   | NA                             | Adult    | NA   | 78   | 2   | 0 | NA                    |
| 39 |                        |               |               |      |                                |          |      |      |     |   |                       |
| 40 |                        |               |               |      |                                |          |      |      |     |   |                       |
| 41 | Wang AH(179)           | Chongqing     | China         | 29   | Mean: 48.19y (range: 3-89y)    | Adult    | 64.0 | 90   | 3   | 0 | till 2020/03/01       |
| 42 |                        |               |               |      |                                |          |      |      |     |   |                       |
| 43 |                        |               |               |      |                                |          |      |      |     |   |                       |
| 44 |                        |               |               |      |                                |          |      |      |     |   |                       |
| 45 |                        |               |               |      |                                |          |      |      |     |   |                       |
| 46 |                        |               |               |      |                                |          |      |      |     |   |                       |

|    |               |           |                   |      |                                     |          |      |      |      |    |                       |
|----|---------------|-----------|-------------------|------|-------------------------------------|----------|------|------|------|----|-----------------------|
| 1  | Wang D(180)   | Chongqing | China             | 576  | Mean: 54.79y                        | Adult    | 41.0 | 61   | 38   | 0  | 2020/1/24-2020/3/10   |
| 2  |               |           |                   |      |                                     |          |      |      |      |    |                       |
| 3  | Wang JC(181)  | Nanjing   | China             | 52   | Mean: 44y (range: 13-73y)           | Adult    | 56.0 | 52   | 2    | 0  | 2020/01/19-2020/02/03 |
| 4  |               |           |                   |      |                                     |          |      |      |      |    |                       |
| 5  | Wang KS(182)  | Pingyang  | China             | 138  | Median: 48y (33-68y)                | Adult    | 22.0 | 9    | 3    | 0  | 2020/01/19-2020/02/03 |
| 6  |               |           |                   |      |                                     |          |      |      |      |    |                       |
| 7  | Wang L(183)   | Zibo      | China             | 244  | Range: 23-84y                       | Adult    | 68.8 | 16   | 2    | 0  | 2020/01/10-2020/02/14 |
| 8  |               |           |                   |      |                                     |          |      |      |      |    |                       |
| 9  | Wang LZ(184)  | Liaocheng | China             | 26   | Median:42y(IQR:34-53y)              | Adult    | 42.3 | 26   | 7    | 0  | 2020/01/31-2020/02/12 |
| 10 |               |           |                   |      |                                     |          |      |      |      |    |                       |
| 11 | Wang S(185)   | Yichang   | China             | 738  | Range: 0.58-91y                     | Adult    | 51.0 | 70   | 70   | 0  | 2020/02/11-2020/02/23 |
| 12 |               |           |                   |      |                                     |          |      |      |      |    |                       |
| 13 | Wang T(186)   | Jilin     | China             | 50   | Mean: 44.52y (range: 16-87y)        | Adult    | 60.0 | 50   | 1    | 0  | 2020/01/28-2020/02/21 |
| 14 |               |           |                   |      |                                     |          |      |      |      |    |                       |
| 15 | Wang XB(187)  | Wuhan     | China             | 1012 | Median:50y(IQR:39-58y;range:16-89y) | Adult    | 52.0 | 1012 | 30   | 16 | 2020/02/07-2020/02/12 |
| 16 |               |           |                   |      |                                     |          |      |      |      |    |                       |
| 17 | Wang XL(188)  | Beijing   | China             | 7432 | Median:39y(IQR:27-56y)              | Adult    | 45.8 | 602  | 17   | 0  | 2020/01/19-2020/04/02 |
| 18 |               |           |                   |      |                                     |          |      |      |      |    |                       |
| 19 | Wang ZQ(189)  | Wuhan     | China             | 30   | Median:29.9y (26.8-33.3y)           | Pregnant | 0.0  | 13   | 8    | 0  | 2019/12/08-2020/04/01 |
| 20 |               |           |                   |      |                                     |          |      |      |      |    |                       |
| 21 | Waya JLL(190) | NA        | South Sudan       | 1330 | Mean: 37.1y                         | Adult    | 77.0 | 1330 | 1104 | 0  | 2020/04/05-2020/06/03 |
| 22 |               |           |                   |      |                                     |          |      |      |      |    |                       |
| 23 | Wong HYF(191) | Hongkong  | China             | 64   | Mean: 56y (range: 16-96y)           | Adult    | 41.0 | 64   | 9    | 0  | 2020/1/1-2020/3/31    |
| 24 |               |           |                   |      |                                     |          |      |      |      |    |                       |
| 25 | Wong J(192)   | NA        | Brunei Darussalam | 135  | Median: 36y (range:0.5-72y)         | Adult    | 60.7 | 135  | 54   | 13 | 2020/03/09-2020/04/05 |
| 26 |               |           |                   |      |                                     |          |      |      |      |    |                       |
| 27 | Wu GY(193)    | Wenzhou   | China             | 104  | Mean: 45y (±13)                     | Adult    | 57.0 | 104  | 2    | 0  | 2020/01/17-2020/02/04 |
| 28 |               |           |                   |      |                                     |          |      |      |      |    |                       |
| 29 | Wu HP(194)    | Jiangxi   | China             | 23   | Range: 0.25-17.67y                  | Children | 39.0 | 23   | 3    | 0  | 2020/01/21-2020/02/29 |
| 30 |               |           |                   |      |                                     |          |      |      |      |    |                       |
| 31 | Wu QR(195)    | Ganzhou   | China             | 55   | Mean: 45.22y (range: 0.25-79y)      | Adult    | 51.0 | 55   | 2    | 0  | 2020/1/23-2020/3/2    |
| 32 |               |           |                   |      |                                     |          |      |      |      |    |                       |
| 33 | Wu XQ(196)    | Wuhan     | China             | 23   | Median: 29y (21-37)                 | Pregnant | 0.0  | 23   | 15   | 0  | 2019/12/31-2020/03/07 |
| 34 |               |           |                   |      |                                     |          |      |      |      |    |                       |
| 35 |               |           |                   |      |                                     |          |      |      |      |    |                       |
| 36 |               |           |                   |      |                                     |          |      |      |      |    |                       |
| 37 |               |           |                   |      |                                     |          |      |      |      |    |                       |
| 38 |               |           |                   |      |                                     |          |      |      |      |    |                       |
| 39 |               |           |                   |      |                                     |          |      |      |      |    |                       |
| 40 |               |           |                   |      |                                     |          |      |      |      |    |                       |
| 41 |               |           |                   |      |                                     |          |      |      |      |    |                       |
| 42 |               |           |                   |      |                                     |          |      |      |      |    |                       |
| 43 |               |           |                   |      |                                     |          |      |      |      |    |                       |
| 44 |               |           |                   |      |                                     |          |      |      |      |    |                       |
| 45 |               |           |                   |      |                                     |          |      |      |      |    |                       |
| 46 |               |           |                   |      |                                     |          |      |      |      |    |                       |

|    |                              |                            |        |     |                             |          |      |     |    |   |                       |
|----|------------------------------|----------------------------|--------|-----|-----------------------------|----------|------|-----|----|---|-----------------------|
| 1  | Wu Y(197)                    | Nantong                    | China  | 23  | Median: 48y (26-68y)        | Adult    | 65.0 | 23  | 1  | 0 | NA                    |
| 2  |                              |                            |        |     |                             |          |      |     |    |   |                       |
| 3  | Wu YL(198)                   | Chengde                    | China  | 8   | Range: 22-56y               | Adult    | 50.0 | 8   | 7  | 0 | 2020/1/24-2020/3/31   |
| 4  |                              |                            |        |     |                             |          |      |     |    |   |                       |
| 5  |                              |                            |        |     |                             |          |      |     |    |   |                       |
| 6  | Xiang TX(199)                | Jiangxi                    | China  | 49  | Mean: 42.9y (18-78y)        | Adult    | NA   | 49  | 3  | 0 | 2020/1/21-2020/1/27   |
| 7  |                              |                            |        |     |                             |          |      |     |    |   |                       |
| 8  | Xie JW(200)                  | Chongqing                  | China  | 6   | Median: 46y (40-67y)        | Adult    | 67.0 | 6   | 3  | 2 | 2020/01/29-2020/02/03 |
| 9  |                              |                            |        |     |                             |          |      |     |    |   |                       |
| 10 |                              |                            |        |     |                             |          |      |     |    |   |                       |
| 11 | Xie YB(201)                  | Yongjia                    | China  | 39  | Median: 52y (22-87y)        | Adult    | 56.0 | 39  | 5  | 0 | 2020/01/20-2020/02/10 |
| 12 |                              |                            |        |     |                             |          |      |     |    |   |                       |
| 13 | Xu HM(202)                   | Chongqing,Shanxi,Guizhou,S | China  | 32  | Mean:8.7y (±4.7)            | Children | 53.0 | 32  | 6  | 0 | 2020/01/24-2020/02/12 |
| 14 |                              | ichuan                     |        |     |                             |          |      |     |    |   |                       |
| 15 |                              |                            |        |     |                             |          |      |     |    |   |                       |
| 16 | Xu S(203)                    | Wuhan                      | China  | 34  | Range: 20-40y               | Pregnant | 0.0  | 34  | 5  | 0 | 2020/01/15-2020/03/15 |
| 17 |                              |                            |        |     |                             |          |      |     |    |   |                       |
| 18 | Xu TM(204)                   | Changzhou                  | China  | 51  | NA                          | Adult    | 33.0 | 51  | 6  | 0 | 2020/1/23-2020/2/18   |
| 19 |                              |                            |        |     |                             |          |      |     |    |   |                       |
| 20 |                              |                            |        |     |                             |          |      |     |    |   |                       |
| 21 | Yan XQ(205)                  | Hunan                      | China  | 218 | Median:43y(IQR:32-52y)      | Adult    | NA   | 218 | 24 | 0 | 2020/01/21-2020/06/27 |
| 22 |                              |                            |        |     |                             |          |      |     |    |   |                       |
| 23 | Yang K(206)                  | Nanjing                    | China  | 57  | Median: 37y (range: 5-97y)  | Adult    | 51.0 | 57  | 13 | 0 | NA                    |
| 24 |                              |                            |        |     |                             |          |      |     |    |   |                       |
| 25 |                              |                            |        |     |                             |          |      |     |    |   |                       |
| 26 | Yang NB(207)                 | Ningbo                     | China  | 12  | Median:33y                  | Adult    | 30.0 | 12  | 2  | 0 | 2020/01/25-2020/02/28 |
| 27 |                              |                            |        |     |                             |          |      |     |    |   |                       |
| 28 | Yang RR(208)                 | Wuhan                      | China  | 78  | Median: 37y (26-45y)        | Adult    | 33.0 | 78  | 33 | 0 | 2019/12/24-2020/02/24 |
| 29 |                              |                            |        |     |                             |          |      |     |    |   |                       |
| 30 |                              |                            |        |     |                             |          |      |     |    |   |                       |
| 31 | Yang YL(209)                 | Chongqing                  | China  | 8   | Median: 53y (range: 9-67y)  | Adult    | 63.0 | 8   | 1  | 0 | 2020/02/01-2020/02/16 |
| 32 |                              |                            |        |     |                             |          |      |     |    |   |                       |
| 33 | Yang YX(210)                 | Chibi                      | China  | 88  | Range: 10-89y               | Adult    | 60.0 | 88  | 1  | 0 | 2020/01-2020/02       |
| 34 |                              |                            |        |     |                             |          |      |     |    |   |                       |
| 35 |                              |                            |        |     |                             |          |      |     |    |   |                       |
| 36 | Yao QD(211)                  | Wuhan                      | China  | 45  | Mean: 47.7y (range: 25-88y) | Adult    | 36.0 | 45  | 1  | 0 | 2020/01/25-2020/02/22 |
| 37 |                              |                            |        |     |                             |          |      |     |    |   |                       |
| 38 | Yao XY(212)                  | Baotou                     | China  | 7   | Median: 51y (36-68y)        | Adult    | 43.0 | 7   | 1  | 1 | 2020/02/01-2020/02/08 |
| 39 |                              |                            |        |     |                             |          |      |     |    |   |                       |
| 40 |                              |                            |        |     |                             |          |      |     |    |   |                       |
| 41 | Yayla Burcu Ceylan Cura(213) | NA                         | Turkey | 220 | Median:10y(range: 0-17y)    | Children | 48.2 | 220 | 55 | 0 | 2020/03/11-2020/06/23 |
| 42 |                              |                            |        |     |                             |          |      |     |    |   |                       |
| 43 |                              |                            |        |     |                             |          |      |     |    |   |                       |
| 44 |                              |                            |        |     |                             |          |      |     |    |   |                       |
| 45 |                              |                            |        |     |                             |          |      |     |    |   |                       |
| 46 |                              |                            |        |     |                             |          |      |     |    |   |                       |

|    |               |          |       |       |                                          |          |      |      |     |   |                       |
|----|---------------|----------|-------|-------|------------------------------------------|----------|------|------|-----|---|-----------------------|
| 1  | Ye XX(214)    | Yongjia  | China | 17    | Median: 48.8y (31-87y)                   | Adult    | 65.0 | 14   | 2   | 0 | 2020/01/24-2020/02/09 |
| 2  |               |          |       |       |                                          |          |      |      |     |   |                       |
| 3  | Ye Y(215)     | Henan    | China | 1272  | NA                                       | Adult    | NA   | 1272 | 113 | 0 | till 2020/03/09       |
| 4  |               |          |       |       |                                          |          |      |      |     |   |                       |
| 5  |               |          |       |       |                                          |          |      |      |     |   |                       |
| 6  | Yu FT(216)    | Beijing  | China | 127   | Median: 40y (range: 0.5-92y)             | Adult    | 50.0 | 77   | 2   | 0 | 2020/02/05-2020/02/19 |
| 7  |               |          |       |       |                                          |          |      |      |     |   |                       |
| 8  | Yu JX(217)    | Hangzhou | China | 87    | Mean: 42.89y ( $\pm$ 17.02; range:4-88y) | Adult    | 46.0 | 87   | 2   | 0 | 2020/1/21-2020/2/12   |
| 9  |               |          |       |       |                                          |          |      |      |     |   |                       |
| 10 |               |          |       |       |                                          |          |      |      |     |   |                       |
| 11 | Yu X(218)     | Guangxi  | China | 108   | Median: 41y (range: 0.25-85y)            | Adult    | 40.0 | 108  | 3   | 0 | 2020/02/06-2020/04/16 |
| 12 |               |          |       |       |                                          |          |      |      |     |   |                       |
| 13 | Yuan L(219)   | Wuhan    | China | 28    | Mean: 29.75y ( $\pm$ 3.5)                | Pregnant | 0.0  | 28   | 15  | 0 | 2020/01/30-2020/03/14 |
| 14 |               |          |       |       |                                          |          |      |      |     |   |                       |
| 15 |               |          |       |       |                                          |          |      |      |     |   |                       |
| 16 | Yue HM(220)   | Gansu    | China | 86    | Median:41y(IQR:31-54.3y)                 | Adult    | 44.2 | 86   | 15  | 0 | 2020/01/21-2020/02/11 |
| 17 |               |          |       |       |                                          |          |      |      |     |   |                       |
| 18 | Zeng J(221)   | Sichuan  | China | 24184 | NA                                       | Adult    | NA   | 226  | 1   | 0 | NA                    |
| 19 |               |          |       |       |                                          |          |      |      |     |   |                       |
| 20 |               |          |       |       |                                          |          |      |      |     |   |                       |
| 21 | Zeng WZ(222)  | Yongzhou | China | 44    | Mean: 39.1y ( $\pm$ 14.5)                | Adult    | 64.0 | 44   | 6   | 0 | 2020/01/21-2020/03/05 |
| 22 |               |          |       |       |                                          |          |      |      |     |   |                       |
| 23 | Zhai HL(223)  | Fuyang   | China | 11    | Mean: 11.76y (range: 0.33-17y)           | Children | 64.0 | 11   | 1   | 0 | 2020/01/22-2020/02/24 |
| 24 |               |          |       |       |                                          |          |      |      |     |   |                       |
| 25 |               |          |       |       |                                          |          |      |      |     |   |                       |
| 26 | Zhan H(224)   | Shiyan   | China | 6     | Median: 8.5y (range: 0.5-11y)            | Children | 50.0 | 6    | 1   | 0 | 2020/2/1              |
| 27 |               |          |       |       |                                          |          |      |      |     |   |                       |
| 28 | Zhan T(225)   | Wuhan    | China | 405   | Median:56y(17-95y)                       | Adult    | 45.9 | 405  | 12  | 0 | 2020/01/12-2020/03/08 |
| 29 |               |          |       |       |                                          |          |      |      |     |   |                       |
| 30 |               |          |       |       |                                          |          |      |      |     |   |                       |
| 31 | Zhang JJ(226) | Beijing  | China | 5     | NA                                       | Adult    | NA   | 5    | 1   | 0 | 2020/01/24-2020/02/29 |
| 32 |               |          |       |       |                                          |          |      |      |     |   |                       |
| 33 | Zhang KY(227) | Kunming  | China | 11    | Mean: 42y (range: 8-67y)                 | Adult    | 45.0 | 11   | 3   | 0 | 2020/01/26-2020/02/20 |
| 34 |               |          |       |       |                                          |          |      |      |     |   |                       |
| 35 |               |          |       |       |                                          |          |      |      |     |   |                       |
| 36 | Zhang L(228)  | Anhui    | China | 33    | Mean:9.59y ( $\pm$ 5.12)                 | Children | 48.5 | 33   | 8   | 0 | till 2020/02/16       |
| 37 |               |          |       |       |                                          |          |      |      |     |   |                       |
| 38 | Zhang R(229)  | Liaoning | China | 2784  | NA                                       | Adult    | 49.0 | 67   | 9   | 0 | 2020/01/22-2020/02/29 |
| 39 |               |          |       |       |                                          |          |      |      |     |   |                       |
| 40 |               |          |       |       |                                          |          |      |      |     |   |                       |
| 41 | Zhang Y(230)  | NA       | China | 41    | Mean:5.93y(range:0.5-14y)                | Children | 73.2 | 41   | 9   | 0 | 2020/01-2020/02       |
| 42 |               |          |       |       |                                          |          |      |      |     |   |                       |
| 43 |               |          |       |       |                                          |          |      |      |     |   |                       |
| 44 |               |          |       |       |                                          |          |      |      |     |   |                       |
| 45 |               |          |       |       |                                          |          |      |      |     |   |                       |
| 46 |               |          |       |       |                                          |          |      |      |     |   |                       |



|    |               |                           |       |     |                            |       |      |     |    |    |                       |
|----|---------------|---------------------------|-------|-----|----------------------------|-------|------|-----|----|----|-----------------------|
| 1  | Zhang YC(231) | Nanjing, Xuzhou           | China | 21  | Median:25y (range: 10-61y) | Adult | 60.0 | 21  | 5  | 0  | 2020/01/25-2020/03/18 |
| 2  |               |                           |       |     |                            |       |      |     |    |    |                       |
| 3  | Zhang YD(232) | Qinghai                   | China | 18  | Range: 7-47y               | Adult | 67.0 | 18  | 7  | 6  | 2020/01/24-2020/02/05 |
| 4  |               |                           |       |     |                            |       |      |     |    |    |                       |
| 5  |               |                           |       |     |                            |       |      |     |    |    |                       |
| 6  | Zhao L(233)   | Shijiazhuang              | China | 30  | NA                         | Adult | 63.0 | 30  | 9  | 0  | 2020/01/21-2020/02-25 |
| 7  |               |                           |       |     |                            |       |      |     |    |    |                       |
| 8  | Zhong ZM(234) | Wuhan, Nanning, Liuzhou   | China | 193 | Mean: 48.1y (range: 3-95y) | Adult | 58.0 | 193 | 46 | 0  | 2020/01/03-2020/03/04 |
| 9  |               |                           |       |     |                            |       |      |     |    |    |                       |
| 10 |               |                           |       |     |                            |       |      |     |    |    |                       |
| 11 | Zhou H(235)   | Qijing                    | China | 13  | Mean: 28y ( $\pm 11.83$ )  | Adult | 46.0 | 13  | 2  | 0  | 2020/01/23-2020/02/27 |
| 12 |               |                           |       |     |                            |       |      |     |    |    |                       |
| 13 | Zhou JL(236)  | Xinyang                   | China | 149 | Mean: 52y ( $\pm 15.48$ )  | Adult | 57.1 | 149 | 10 | 0  | 2020/01/13-2020/03/02 |
| 14 |               |                           |       |     |                            |       |      |     |    |    |                       |
| 15 |               |                           |       |     |                            |       |      |     |    |    |                       |
| 16 | Zhou R(237)   | Guangzhou                 | China | 31  | NA                         | Adult | NA   | 31  | 9  | 0  | 2020/01/23-2020/03/03 |
| 17 |               |                           |       |     |                            |       |      |     |    |    |                       |
| 18 |               | Shanxi, Qinghai, Tibet,   |       |     |                            |       |      |     |    |    |                       |
| 19 | Zhu JF(238)   | Xinjiang, Ningxia, Gansu, | China | 617 | Median:42y(1 to 94 years)  | Adult | 52.0 | 617 | 82 | 0  | 2020/01/21-2020/03/11 |
| 20 |               | Inner Mongolia, Hubei     |       |     |                            |       |      |     |    |    |                       |
| 21 |               |                           |       |     |                            |       |      |     |    |    |                       |
| 22 | Zhu MR(239)   | Shanghai                  | China | 77  | Range: 14-62y              | Adult | 70.1 | 77  | 14 | 0  | 2020/03/14-2020/07/03 |
| 23 |               |                           |       |     |                            |       |      |     |    |    |                       |
| 24 |               |                           |       |     |                            |       |      |     |    |    |                       |
| 25 | Zhu SQ(240)   | Shenzhen                  | China | 417 | Mean: 45.3y (range:1-86y)  | Adult | 47.0 | 417 | 11 | 11 | 2020/01/01-2020/02/14 |

## Reference

1. Abeysuriya S, Wasif S, Counihan C, Shah N, Iliodromiti S, Cutino-Moguel MT, et al. Universal screening for SARS-CoV-2 in pregnant women at term admitted to an East London maternity unit. *European journal of obstetrics, gynecology, and reproductive biology*. 2020;252:444-6.
2. Adedeji IA, Abdu YM, Bashir MF, Adamu AS, Gwarzo GD, Yaro BS, et al. Profile of children with COVID-19 infection: a cross sectional study from North-East Nigeria. *The Pan African medical journal*. 2020;35(Suppl 2):145.
3. Adetola HH, Ishola D, Afolabi MO, Bangura J, Sesay IG, Pearce R, et al. Clinical presentations and management of COVID-19 infected children seen in a district health facility in Kambia, northern Sierra Leone. *The Pan African medical journal*. 2020;37(Suppl 1):28.
4. Aherfi S, Raoult D, La Scola B, Gautret P, Chaudet H. Clusters of COVID-19 associated with Purim celebration in the Jewish community in Marseille, France, March 2020. *International journal of infectious diseases : IJID : official publication of the International Society for Infectious Diseases*. 2020;100:88-94.
5. Almazeedi S, Al-Youha S, Jamal MH, Al-Haddad M, Al-Muhaini A, Al-Sabah S, et al. Characteristics, risk factors and outcomes among the first consecutive 1096 patients diagnosed with COVID-19 in Kuwait. *EclinicalMedicine*. 2020;24:100448.
6. Alshahrani MS, Alnimr A, Alnassri S, Alfarag S, Aljehani Y, Alabdali M. Prevalence of the sars-cov-2 infection among post-quarantine healthcare workers. *Journal of Multidisciplinary Healthcare*. 2020;13:1927-36.
7. Alshukry A, Ali Y, Bader AA, Abbas MB, Dashti AA, Ali H, et al. Clinical characteristics of coronavirus disease 2019 (COVID-19) patients in Kuwait. *PLoS ONE*. 2020;15(11 November):e0242768.
8. Alsofayan YM, Althunayyan SM, Khan AA, Hakawi AM, Assiri AM. Clinical characteristics of COVID-19 in Saudi Arabia: A national retrospective study. *Journal of infection and public health*. 2020;13(7):920-5.
9. Ing AJ, Cocks C, Green JP. COVID-19: in the footsteps of Ernest Shackleton. *Thorax*. 2020;75(8):693-4.
10. Dora AV, Winnett A, Jatt LP, Davar K, Watanabe M, Sohn L, et al. Universal and serial laboratory testing for SARS-CoV-2 at a long-term care skilled nursing facility for veterans—Los Angeles, California, 2020. *Morbidity and Mortality Weekly Report*. 2020;69(21):651.
11. An Y, ROng D, Shan Y. Comparison of chest radiograph images between suspected and confirmed cases of COVID-19. *Journal of Capital Medical University*. 2020;41 (4):608-12.
12. Lombardi A, Consonni D, Carugno M, Bozzi G, Mangioni D, Muscatello A, et al. Characteristics of 1573 healthcare workers who underwent nasopharyngeal swab testing for SARS-CoV-2 in Milan, Lombardy, Italy. *Clinical microbiology and infection*. 2020;26(10):1413. e9-. e13.
13. Antonio-Villa NE, Bello-Chavolla OY, Vargas-Vázquez A, Fermín-Martínez CA, Márquez-Salinas A, Bahena-López JP. Health-care workers with COVID-19 living in Mexico City: clinical characterization and related outcomes. *Clinical infectious diseases : an official publication of the Infectious Diseases Society of America*. 2020.
14. Arima Y, Kutsuna S, Shimada T, Suzuki M, Suzuki T, Kobayashi Y, et al. Severe acute respiratory syndrome coronavirus 2 infection among returnees to Japan from Wuhan, China, 2020. *Emerging infectious diseases*. 2020;26(7):1596.
15. Ashinyo ME, Akoriyea SK, Duti V, Dubik SD, Amegah KE, Kutsoati S, et al. Clinical

1  
2  
3 characteristics, treatment regimen and duration of hospitalization among COVID-19 patients in Ghana:  
4 a retrospective cohort study. *The Pan African medical journal*. 2020;37(Supplement 1):9.

5  
6 16. Atakla HG, Sacca H, Houinato AG, Houinato DS, Noudohounsi MMUD, Salami AY, et al.  
7 COVID-19 infection in pediatric subjects: study of 36 cases in Conakry. *The Pan African medical*  
8 *journal*. 2020;37(Supplement 1):42.

9  
10 17. Backer JA, Klinkenberg D, Wallinga J. Incubation period of 2019 novel coronavirus (2019-nCoV)  
11 infections among travellers from Wuhan, China, 20–28 January 2020. *Eurosurveillance*.  
12 2020;25(5):2000062.

13  
14 18. Ma L, Chen Y, Chen XL. [Management protocol and outcome assessment of ruptured intracranial  
15 aneurysm emergency surgery during coronavirus disease 2019 pandemic]. *Zhonghua yi xue za zhi*.  
16 2020;100(47):3768-74.

17  
18 19. R B, ZH J, H Z, J Z. Analysis on the epidemiological characteristics of an outbreak of coronavirus  
19 disease 2019 (COVID – 19) in Xi'an. *Zhonghua Jibing Kongzhi Zazhi*. 2020;24 (5):567-72.

20  
21 20. SL B, JY W, YQ Z, Y D. Analysis of the first cluster of cases in a family of novel coronavirus  
22 pneumonia in Gansu Province. *Chines Medical association*. 2020.

23  
24 21. Sarangi B, Reddy VS, Oswal JS, Malshe N, Patil A, Chakraborty M, et al. Epidemiological and  
25 clinical characteristics of COVID-19 in Indian children in the initial phase of the pandemic. *Indian*  
26 *pediatrics*. 2020;57(10):914-7.

27  
28 22. Bianco A, Buckley AB, Overbey J, Smilen S, Wagner B, Dinglas C, et al. Testing of Patients and  
29 Support Persons for Coronavirus Disease 2019 (COVID-19) Infection Before Scheduled Deliveries.  
30 *Obstetrics and gynecology*. 2020;136(2):283-7.

31  
32 23. YanFei, Ji P, Liang X. Clinical characteristics of 55 hospitalized patients with COVID-19 in  
33 Wuhan, China. *Journal of Guangxi Medical Univeristy*. 2020;37 (2):338-42.

34  
35 24. Blain H, Giacosa N, Albrand M, Miot S, Rolland Y, Tuailon E, et al. Efficacy of a Test-Retest  
36 Strategy in Residents and Health Care Personnel of a Nursing Home Facing a COVID-19 Outbreak.  
37 *Journal of the American Medical Directors Association*. 2020;21(7):933-6.

38  
39 25. Böhmer MM, Buchholz U, Corman VM, Hoch M, Katz K, Marosevic DV, et al. Investigation of a  
40 COVID-19 outbreak in Germany resulting from a single travel-associated primary case: a case series.  
41 *The Lancet Infectious Diseases*. 2020;20(8):920-8.

42  
43 26. Breslin N, Baptiste C, Gyamfi-Bannerman C, Miller R, Martinez R, Bernstein K, et al.  
44 Coronavirus disease 2019 infection among asymptomatic and symptomatic pregnant women: two  
45 weeks of confirmed presentations to an affiliated pair of New York City hospitals. *American journal of*  
46 *obstetrics & gynecology MFM*. 2020;2(2):100118.

47  
48 27. Bruminhent J, Kiertiburanakul S, Ruangsubvilai N, Nabhindhakara J, Ingsathit A. Clinical  
49 characteristics and risk factors for coronavirus disease 2019 (COVID-19) among patients under  
50 investigation in Thailand. *PLoS ONE*. 2020;15(9 September):e0239250.

51  
52 28. Cai J, Wang X, Zhao J, Ge Y, Xu J, Tian H, et al. Comparison of Clinical and Epidemiological  
53 Characteristics of Asymptomatic and Symptomatic SARS-CoV-2 Infection in Children. *Virologica*  
54 *Sinica*. 2020;35(6):803-10.

55  
56 29. Cao J, Wang W, Chen T. Comparative study on CT manifestation in COVID-19 between imported  
57 patients and teh second-generation cases. *Medical Journal West China*. 2020;32 (5):628-32.

58  
59 30. Felice C, Di Tanna GL, Zanus G, Grossi U. Impact of COVID-19 outbreak on healthcare workers  
60 in italy: results from a national E-survey. *Journal of community health*. 2020;45(4):675-83.

31. Chan JF-W, Yip CC-Y, To KK-W, Tang TH-C, Wong SC-Y, Leung K-H, et al. Improved

- molecular diagnosis of COVID-19 by the novel, highly sensitive and specific COVID-19-RdRp/Hel real-time reverse transcription-PCR assay validated in vitro and with clinical specimens. *Journal of clinical microbiology*. 2020;58(5).
32. Argun Barış S, Coşkun İ S, Selvi G, Boyacı H, Başığit İ. Case Series of COVID-19 Presenting with Massive Hemoptysis. *Turkish thoracic journal*. 2020;21(6):454-6.
33. J C. Asymptomatic SARS-CoV-2 infection in children: a clinical analysis of 20 cases. *Chinese Journal of Contemporary Pediatrics*. 2020;22 (5):414-8.
34. Chen T, Jinag Z, XU W, Zhang Q. Clinical features and CT imaging analysis of 76 patients with Corona Virus Disease 2019. *Journal of Jinan University (Natural Science & Medicine Edition)*. 2020;41 (2):157-62.
35. Chen Y, Wang A, KQ D, HB W, W J. The epidemiological characteristics of infection in close contacts of COVID-19 in Ningbo City. *Chinese Journal of Epidemiology*. 2020;41 (5):668-72.
36. Chen Y, Shui L, Pang X, Mu H, Wang J, Lang C, et al. Clinical features of coronavirus disease 2019 in Northeast area of Chongqing: analysis of 143 cases. *J Third Mil Med Univ*. 2020;42:549-54.
37. Cheng Z, Li Y, Duan Y. A preliminary study on the dynamic imaging of chest high resolution CT in patients with mild COVID-19. *Chinese Journal of Radiology*. 2020;54 (6):548-51.
38. Choe PG, Kang CK, Suh HJ, Jung J, Song K-H, Bang JH, et al. Waning antibody responses in asymptomatic and symptomatic SARS-CoV-2 infection. *Emerging infectious diseases*. 2021;27(1):327-9.
39. Team C-N. Australia: Epidemiology Report 7: Reporting week ending 19:00 AEDT 14 March 2020. 2020.
40. Dai Y, Tang N. Clinical analysis of 11 pediatric patients with 2019 corona virus disease in Guangxi. *China Journal of Academic Journal Electronic Publishing House*. 2020;13:1149-52.
41. Loconsole D, Caselli D, Centrone F, Morcavallo C, Campanella S, Aricò M, et al. SARS-CoV-2 Infection in children in southern Italy: a descriptive case series. *International Journal of Environmental Research and Public Health*. 2020;17(17):6080.
42. Ding Y, Huang Z. Clinical and imaging characteristics of corona virus disease 2019 (COVID-2019). *Radial Practice*. 2020;35 (2):281-5.
43. Dong X, Cao Y, Lu X. Eleven faces of coronavirus disease 2019. *Allergy*. 2020.
44. Dong X, Li J, Bai J, Liu Z, Zhou P, Gao L, et al. Epidemiological characteristics of confirmed COVID-19 cases in Tianjin. *Zhonghua liu xing bing xue za zhi= Zhonghua liuxingbingxue zazhi*. 2020;41(5):638-42.
45. Yuying D, Qiandong F, Yueping W, Yulai L, Junpeng X, Jing Y, et al. Analysis in nucleic acid test results of patients with coronavirus disease 2019 in Yangzhou City of Jiangsu Province. *Journal of Clinical in Practice*. 2020;24(5):6-9.
46. Erinoso OA, Wright KO, Anya S, Adejumo O, Abdur-Razzaq H, Lajide D, et al. Clinical characteristics, predictors of symptomatic coronavirus disease 2019 and duration of hospitalisation in a cohort of 632 Patients in Lagos State, Nigeria. *The Nigerian postgraduate medical journal*. 2020;27(4):285-92.
47. Eythorsson E, Helgason D, Ingvarsson RF, Bjornsson HK, Olafsdottir LB, Bjarnadottir V, et al. Clinical spectrum of coronavirus disease 2019 in Iceland: Population based cohort study. *The BMJ*. 2020;371:m4529.
48. Fakiri KE, Nassih H, Sab IA, Draiss G, Bouskraoui M. Epidemiology and Clinical Features of Coronavirus Disease 2019 in Moroccan Children. *Indian pediatrics*. 2020;57(9):808-10.

- 1
- 2
- 3
- 4 49. Fan Y, Chang H. Pathogen detection strategies in different stage of COVID-19 in Lu'an City. *Anhui Journal of Preventive Medicine*. 2020;26:250-2.
- 5
- 6 50. Feaster M, Goh Y-Y. High proportion of asymptomatic SARS-CoV-2 infections in 9 long-term  
7 care facilities, Pasadena, California, USA, April 2020. *Emerging Infectious Diseases*.  
8 2020;26(10):2416-9.
- 9
- 10 51. Feng X. An analysis of 52 cases with coronavirus disease 2019 in Jiangling District, Jingzhou.  
11 *Jiangsu Medical Journal*. 2020;24 (5):6-9.
- 12
- 13 52. Foster CE, Marquez L, Davis AL, Tocco E, Koy TH, Campbell JR, et al. A Surge in Pediatric  
14 Coronavirus Disease 2019 Cases: The Experience of Texas Children's Hospital from March to June  
15 2020. *Journal of the Pediatric Infectious Diseases Society*. 2020.
- 16
- 17 53. Maechler F, Gertler M, Hermes J, van Loon W, Schwab F, Piening B, et al. Epidemiological and  
18 clinical characteristics of SARS-CoV-2 infections at a testing site in Berlin, Germany, March and April  
19 2020—a cross-sectional study. *Clinical Microbiology and Infection*. 2020;26(12):1685. e7-. e12.
- 20
- 21 54. Gao H. Epidemiological characteristics of coronavirus disease 2019 outbreak in Ganzr Tibetan  
22 Autonomous Prefecture, Sichuan. *Disease Surveillance*. 2020;35 (9):793-7.
- 23
- 24 55. Gao T, He X. Clinical characteristics of COVID-19: an analysis of 11 cases. *China Journal of  
25 Clinical Infectious Disease*. 2020;13 (1):25-8.
- 26
- 27 56. Gautret P, Lagier J-C, Parola P, Meddeb L, Mailhe M, Doudier B, et al. Hydroxychloroquine and  
28 azithromycin as a treatment of COVID-19: results of an open-label non-randomized clinical trial.  
29 *International journal of antimicrobial agents*. 2020;56(1):105949.
- 30
- 31 57. Livingston G, Rostampour H, Gallagher P, Kalafatis C, Shastri A, Huzzey L, et al. Prevalence,  
32 management, and outcomes of SARS-CoV-2 infections in older people and those with dementia in  
33 mental health wards in London, UK: a retrospective observational study. *The Lancet Psychiatry*.  
34 2020;7(12):1054-63.
- 35
- 36 58. Grados IZ, Zavala GB, Yauri MA, Loli LP, Sembrera E, Vasquez A, et al. Characteristics of  
37 SARS-CoV-2 infection in pregnant and puerperal women at Callao national hospital, Peru. *Revista  
38 Peruana de Ginecologia y Obstetricia*. 2020;66(3).
- 39
- 40 59. Graham NSN, Lai H, Sharp DJ, Junghans C, Downes R, Sendall C, et al. SARS-CoV-2 infection,  
41 clinical features and outcome of COVID-19 in United Kingdom nursing homes. *Journal of Infection*.  
42 2020;81(3):411-9.
- 43
- 44 60. Grechukhina O, Greenberg V, Lundsberg LS, Deshmukh U, Cate J, Lipkind HS, et al.  
45 Coronavirus disease 2019 pregnancy outcomes in a racially and ethnically diverse population. *Am J  
46 Obstet Gynecol MFM*. 2020;2(4):100246.
- 47
- 48 61. Kim G-u, Kim M-J, Ra SH, Lee J, Bae S, Jung J, et al. Clinical characteristics of asymptomatic  
49 and symptomatic patients with mild COVID-19. *Clinical microbiology and infection*. 2020;26(7):948.  
50 e1-. e3.
- 51
- 52 62. Guo C-X, Yang G-P, He L, Bo T, Yin J-Y, Meng X-G, et al. Epidemiological and clinical features  
53 of pediatric COVID-19. *BMC Medicine*. 2020;18(1):250.
- 54
- 55 63. Han R, Ma J. Clinical characteristics of 108 patients with COVID – 19 infection. *Practice Prevent  
56 Medicine*. 2020;27 (9):1040-3.
- 57
- 58 64. He M, Wang C, Xu L, Zhang H, Liu Y, Zhao Y, et al. Epidemiological and clinical characteristics  
59 of 35 children with COVID-19 in Beijing, China. *Pediatric Investigation*. 2020;4(4):230-5.
- 60
65. He W, Liang Z. Epidemiological characteristics of 101 cases of new coronavirus infection in  
Zhuzhou City. *Jiangsu Journal of Preventive Medicine*. 2020;31 (6):644-5.

- 1
- 2
- 3
- 4 66. Hu S, Xu Q, Luo K. Epidemiological characteristics of patients with coronavirus disease 2019 in
- 5 Hunan province. *Practice Prevent Medicine*. 2020;27 (4):385-8.
- 6 67. Zou X, Wu YS, Liu XJ, Huang SL, He JF, Zhao J, et al. [Evaluation of the emergency response
- 7 strategies and measures on the epidemic of COVID-19 in Shenzhen, China]. *Zhonghua liu xing bing*
- 8 *xue za zhi = Zhonghua liuxingbingxue zazhi*. 2020;41(8):1225-30.
- 9
- 10 68. Huerta Saenz IH, Elías Estrada JC, Campos Del Castillo K, Muñoz Taya R, Coronado JC.
- 11 Características materno perinatales de gestantes COVID-19 en un hospital nacional de Lima, Perú.
- 12 *Revista Peruana de Ginecología y Obstetricia*. 2020;66(2).
- 13
- 14 69. Ipekci A, Akdeniz YS, Ozkan S, Tutar O, Sirolu S, Simsek O. The clinical and computed
- 15 tomography findings of patients with COVID-19. *Signa Vitae*. 2020;16(1):173-8.
- 16
- 17 70. Petersen I, Phillips A. Three quarters of people with SARS-CoV-2 infection are asymptomatic:
- 18 analysis of English household survey data. *Clinical Epidemiology*. 2020;12:1039.
- 19
- 20 71. Singer JS, Cheng EM, Murad DA, Maurice AdS, Hines OJ, Uslan DZ, et al. Low prevalence
- 21 (0.13%) of COVID-19 infection in asymptomatic pre-operative/pre-procedure patients at a large,
- 22 academic medical center informs approaches to perioperative care. *Surgery*. 2020;168(6):980-6.
- 23
- 24 72. Jeong SJ, Sohn Y, Hyun JH, Baek YJ, Cho Y, Kim JH, et al. Clinical characteristics and online
- 25 mental health care of asymptomatic or mildly symptomatic patients with coronavirus disease 2019.
- 26 *PLoS ONE*. 2020;15(11 November):e0242130.
- 27
- 28 73. Jha S, Soni A, Siddiqui S, Batra N, Goel N, Dey S, et al. Prevalence of Flu-like Symptoms and
- 29 COVID-19 in Healthcare Workers from India. *The Journal of the Association of Physicians of India*.
- 30 2020;68(7):27-9.
- 31
- 32 74. Zhang JZ, Zhou P, Han DB, Wang WC, Cui C, Zhou R, et al. [Investigation on a cluster epidemic
- 33 of COVID-19 in a supermarket in Liaocheng, Shandong province]. *Zhonghua liu xing bing xue za zhi*
- 34 *= Zhonghua liuxingbingxue zazhi*. 2020;41(12):2024-8.
- 35
- 36 75. Ji T, Chen H-L, Xu J, Wu L-N, Li J-J, Chen K, et al. Lockdown contained the spread of 2019
- 37 novel coronavirus disease in Huangshi city, China: Early epidemiological findings. *Clinical Infectious*
- 38 *Diseases*. 2020;71(6):1454-60.
- 39
- 40 76. Jia C, Zhao D, Feng J. Analysis of imaging feature and evolvement characteristic of severe
- 41 COVID-19. *Beijing Medical Journal*. 2020:489-92.
- 42
- 43 77. Jiang C, Hu M, Wen L, Wang Y, Li G, Wen C, et al. Antibody seroconversion in asymptomatic
- 44 and symptomatic patients infected with severe acute respiratory syndrome coronavirus 2
- 45 (SARS-CoV-2). *Clinical and Translational Immunology*. 2020;9(9):e1182.
- 46
- 47 78. Jiang R. CT findings and outcome with family clustering COVID-19 in 8 families. *Electronic*
- 48 *Journal of Emerging Infectious Diseases*. 2020;5 (2):87-90.
- 49
- 50 79. Jibrin YB, Maigari IM, Dunga JA, Umar MS, Mohammed A, Okwong OK, et al. Clinical and
- 51 laboratory characteristics of COVID-19 among adult patients admitted to the isolation centre at
- 52 Abubakar Tafawa Balewa Teaching Hospital Bauchi, Northeast Nigeria. *The Pan African medical*
- 53 *journal*. 2020;37(Supplement 1):27.
- 54
- 55 80. Jin M, Shen J, Fu Y. Epidemiological characteristics of coronavirus disease 2019 in Huzhou.
- 56 *Preventive Medicine*. 2020;32 (5):433-6.
- 57
- 58 81. Jung C-Y, Chang TI, Park H, Kim DW, Choi YJ, Kim SW. Clinical Characteristics of
- 59 Asymptomatic Patients with COVID-19: A Nationwide Cohort Study in South Korea. *International*
- 60 *Journal of Infectious Diseases*. 2020;99:266-8.
82. Kang M, Wu J, Ma W, He J, Lu J, Liu T, et al. Evidence and characteristics of human-to-human

- transmission of SARS-CoV-2. medRxiv. 2020:2020.02.03.20019141.
83. Kasper MR, Gillingham BL, Geibe JR, Riegodedios AJ, Luse T, von Thun AM, et al. An outbreak of covid-19 on an aircraft carrier. *New England Journal of Medicine*. 2020;383(25):2417-26.
84. Bai K, Liu W, Liu C, Fu Y, Hu J, Qin Y, et al. Clinical analysis of 25 COVID-19 infections in children. *The Pediatric infectious disease journal*. 2020;39(7):e100-e3.
85. Kenu E, Odikro MA, Malm KL, Asiedu-Bekoe F, Noora CL, Frimpong JA, et al. Epidemiology of COVID-19 outbreak in Ghana, 2020. *Ghana Med J*. 2020;54(4):5-15.
86. Ki M. Epidemiologic characteristics of early cases with 2019 novel coronavirus (2019-nCoV) disease in Korea. *Epidemiology and health*. 2020;42.
87. Kirenga B, Muttamba W, Kayongo A, Mugenyi L, Nantanda R, Kimuli I, et al. Characteristics and outcomes of admitted patients infected with SARS-CoV-2 in Uganda. *BMJ Open Respiratory Research*. 2020;7(1):000646.
88. Kong W, Wang Y, Pu H, Hu J, Chughtai A. Comparison of clinical and epidemiological characteristics of asymptomatic and symptomatic SARS-CoV-2 infection: A multi-center study in Sichuan Province, China. *Travel Medicine and Infectious Disease*. 2020;37:101754.
89. Krajcar N, Marić LS, Šurina A, Filipović SK, Trkulja V, Roglić S, et al. Epidemiological and clinical features of Croatian children and adolescents with a PCR-confirmed coronavirus disease 2019: differences between the first and second epidemic wave. *Croatian medical journal*. 2020;61(6):491.
90. Meyers KJ, Jones ME, Botros FT, Knorr J, Manner DH, Woodward B, et al. A cross-sectional community-based observational study of asymptomatic SARS-CoV-2 prevalence in the greater Indianapolis area. *Journal of medical virology*. 2020;92(11):2874-9.
91. Kumar R, Bhattacharya B, Meena VP, Aggarwal A, Tripathi M, Soneja M, et al. Characteristics and outcomes of 231 COVID-19 cases admitted at a tertiary facility in India: An observational cohort study. *Journal of family medicine and primary care*. 2020;9(12):6267.
92. Ladhani SN, Chow JY, Janarthanan R, Fok J, Crawley-Boevey E, Vusirikala A, et al. Investigation of SARS-CoV-2 outbreaks in six care homes in London, April 2020. *EClinicalMedicine*. 2020;26:100533.
93. Lai X, Wang M, Qin C, Tan L, Ran L, Chen D, et al. Coronavirus disease 2019 (COVID-2019) infection among health care workers and implications for prevention measures in a tertiary hospital in Wuhan, China. *JAMA network open*. 2020;3(5):e209666-e.
94. Le TQM, Takemura T, Moi ML, Nabeshima T, Nguyen LKH, Hoang VMP, et al. Severe acute respiratory syndrome coronavirus 2 shedding by travelers, Vietnam, 2020. *Emerging infectious diseases*. 2020;26(7):1624.
95. Lee Y-H, Hong CM, Kim DH, Lee TH, Lee J. Clinical course of asymptomatic and mildly symptomatic patients with coronavirus disease admitted to community treatment centers, South Korea. *Emerging infectious diseases*. 2020;26(10):2346.
96. Lei Y. Characteristics of cluster epidemic of 2019 novel coronavirus disease in Guizhou province. *China Journal of Public Health*. 2020;36 (4):493-7.
97. Lewis M, Sanchez R, Auerbach S, Nam D, Lanier B, Taylor J, et al. COVID-19 outbreak among college students after a spring break trip to Mexico—Austin, Texas, March 26–April 5, 2020. 2020.
98. Lin C, Xiang J, Yan M, Li H, Huang S, Shen C. Comparison of throat swabs and sputum specimens for viral nucleic acid detection in 52 cases of novel coronavirus (SARS-Cov-2)-infected pneumonia (COVID-19). *Clinical Chemistry and Laboratory Medicine (CCLM)*. 2020;58(7):1089-94.
99. Li J, Thoon KC, Chong CY, Maiwald M, Kam KQ, Nadua K, et al. Comparative analysis of

- 1  
2  
3 symptomatic and asymptomatic SARS-CoV-2 infection in children. *Ann Acad Med Singap.* 2020;49(8):530-7.  
4  
5  
6 100. Li W, Cui H, Li K, Fang Y, Li S. Chest computed tomography in children with COVID-19  
7 respiratory infection. *Pediatric radiology.* 2020:1-4.  
8  
9 101. Li Y, Xia L. Coronavirus disease 2019 (COVID-19): role of chest CT in diagnosis and  
10 management. *American Journal of Roentgenology.* 2020;214(6):1280-6.  
11  
12 102. Li Y, Deng W, Xiong H, Li H, Chen Z, Nie Y, et al. Immune-related factors associated with  
13 pneumonia in 127 children with coronavirus disease 2019 in Wuhan. *Pediatric Pulmonology.*  
14 2020;55(9):2354-60.  
15  
16 103. Li Y, Shi J, Xia J, Duan J, Chen L, Yu X, et al. Asymptomatic and symptomatic patients with  
17 non-severe coronavirus disease (COVID-19) have similar clinical features and virological courses: a  
18 retrospective single center study. *Frontiers in microbiology.* 2020;11:1570.  
19  
20 104. Liao X. Chest CT features comparison between COVID-19 and bacterial pneumonia. *Medical*  
21 *Journal of Wuhan University.* 2020;41 (3).  
22  
23 105. Lin S, Pan H, Wu H, Yu X, Cui P, Han R, et al. Epidemiological and clinical characteristics of 161  
24 discharged cases with coronavirus disease 2019 in Shanghai, China. *BMC Infectious Diseases.*  
25 2020;20(1):1-10.  
26  
27 106. Lin X, Liu Z. Clinicot analysis of 23 patients with new coronavirus infection. *Journal of Baotou*  
28 *Medical College.* 2020;36 (10):20-3.  
29  
30 107. Lin Z, Shao Y, QP P. Clinical Analysis of 2019 Novel Coronavirus Disease in 205 Cases. *Chinese*  
31 *Journal of Dialysis and Artifucak Organs.* 2020;31 (1):6-9.  
32  
33 108. Liu B, Liang Q. Clinical analysis of 9 imported cases of COVID-19. *Medical Journal of National*  
34 *Defending Forces in Southwest China.* 2020;30 (10):926-9.  
35  
36 109. Liu B, Yang Q, Zhao L, Xie W, Si X. Epidemiological characteristics of COVID-19 patients in  
37 convalescence period. *Epidemiology & Infection.* 2020;148.  
38  
39 110. Liu B, Qi X, M J. Epidemiological characteristics of imported COVID-19 cases from abroad to  
40 Zhejiang Province. *Preventive Medicine.* 2020;32 (6):550-4.  
41  
42 111. Liu D, Li L, Wu X, Zheng D, Wang J, Yang L, et al. Pregnancy and perinatal outcomes of women  
43 with coronavirus disease (COVID-19) pneumonia: a preliminary analysis. *American journal of*  
44 *roentgenology.* 2020;215(1):127-32.  
45  
46 112. Liu F, Xu A, Zhang Y, Xuan W, Yan T, Pan K, et al. Patients of COVID-19 may benefit from  
47 sustained lopinavir-combined regimen and the increase of eosinophil may predict the outcome of  
48 COVID-19 progression. *International Journal of Infectious Diseases.* 2020;95:183-91.  
49  
50 113. Liu F, Lan W, Gan Q. Clinical and CT features of coronavirus disease in pregnant women.  
51 *Radiologic Practice.* 2020;35 (4):417-20.  
52  
53 114. Liu G. Analysis of the characteristics of the novel coronavirus pneumonia in Ningxia. *Journal of*  
54 *Ningxia Medical University.* 2020;42 (2):109-13.  
55  
56 115. Liu M, Song Z, Xiao K. High-resolution computed tomography manifestations of 5 pediatric  
57 patients with 2019 novel coronavirus. *Journal of computer assisted tomography.* 2020.  
58  
59 116. Liu X. Report of COVID-19 family clustering epidemic caused by asymptomatic infection.  
60 *Chinese Journal of Public Health.* 2020;36 (3):282-4.  
117. Liu X, Sun Y. Epidemiological features of COVID-19 in women and children in Heifei City.  
*Anhui Journal of Preventive Mendicine.* 2020;26 (6):415-7.  
118. Liu Y, Chen H, Tang K, Guo Y. Clinical manifestations and outcome of SARS-CoV-2 infection



- 1  
2  
3 during pregnancy. *J infect.* 2020;10.  
4  
5 119. Liu Y, Yang Y, Zhang C, Huang F, Wang F, Yuan J, et al. Clinical and biochemical indexes from  
6 2019-nCoV infected patients linked to viral loads and lung injury. *Science China Life Sciences.*  
7 2020;63(3):364-74.  
8  
9 120. Liu Z, Su B, Wu J. Investigation and analysis of a family cluster of COVID – 19 cases. *Chinese*  
10 *Journal of Disease Control & Prevention.* 2020;24 (5).  
11  
12 121. Lu R, Qin J, Wu Y, Wang J, Huang S, Tian L, et al. Epidemiological and clinical characteristics of  
13 COVID-19 patients in Nantong, China. *The Journal of Infection in Developing Countries.*  
14 2020;14(05):440-6.  
15  
16 122. Lu X, Zhang L, Du H, Zhang J, Li YY, Qu J, et al. SARS-CoV-2 infection in children. *New*  
17 *England Journal of Medicine.* 2020;382(17):1663-5.  
18  
19 123. Lu Y, Wen H, Rong D, Zhou Z, Liu H. Clinical characteristics and radiological features of  
20 children infected with the 2019 novel coronavirus. *Clinical radiology.* 2020;75(7):520-5.  
21  
22 124. Rivett L, Sridhar S, Sparkes D, Routledge M, Jones NK, Forrest S, et al. Screening of healthcare  
23 workers for SARS-CoV-2 highlights the role of asymptomatic carriage in COVID-19 transmission.  
24 *Elife.* 2020;9:e58728.  
25  
26 125. Luo S, Liu W, Liu Z. Confirmed asymptomatic carrier of SARS-CoV-2. 2020.  
27  
28 126. Arons MM, Hatfield KM, Reddy SC, Kimball A, James A, Jacobs JR, et al. Presymptomatic  
29 SARS-CoV-2 infections and transmission in a skilled nursing facility. *New England journal of*  
30 *medicine.* 2020;382(22):2081-90.  
31  
32 127. Ma M, Ma X. Epidemiological characteristics of COVID-19 in Guangzhou. *South China Journal*  
33 *of Preventive Medicine.* 2020;46 (4):380-4.  
34  
35 128. Ma Y, Xu Q-n, Wang F-L, Ma X-m, Wang X-Y, Zhang X-G, et al. Characteristics of  
36 asymptomatic patients with SARS-CoV-2 infection in Jinan, China. *Microbes and infection.*  
37 2020;22(4-5):212-7.  
38  
39 129. Ma Y. Clinical features of children with SARS-CoV-2 infection: an analysis of 115 cases. *Chinese*  
40 *Journal of Contemporary Pediatrics.* 2020;22 (4):14.  
41  
42 130. MacIntyre CR. On a knife's edge of a COVID-19 pandemic: is containment still possible. *Public*  
43 *Health Res Pract.* 2020;30(1):3012000.  
44  
45 131. Patel MC, Chaisson LH, Borgetti S, Burdsall D, Chugh RK, Hoff CR, et al. Asymptomatic  
46 SARS-CoV-2 infection and COVID-19 mortality during an outbreak investigation in a skilled nursing  
47 facility. *Clinical Infectious Diseases.* 2020;71(11):2920-6.  
48  
49 132. Martin C, Montesinos I, Dauby N, Gilles C, Dahma H, Van Den Wijngaert S, et al. Dynamics of  
50 SARS-CoV-2 RT-PCR positivity and seroprevalence among high-risk healthcare workers and hospital  
51 staff. *Journal of Hospital Infection.* 2020;106(1):102-6.  
52  
53 133. Maru S, Patil U, Carroll-Bennett R, Baum A, Bohn-Hemmerdinger T, Ditchik A, et al. Universal  
54 screening for sars-cov-2 infection among pregnant women at Elmhurst hospital center, Queens, New  
55 York. *PloS one.* 2020;15(12):e0238409.  
56  
57 134. McMichael TM, Currie DW, Clark S, Pogosjans S, Kay M, Schwartz NG, et al. Epidemiology of  
58 Covid-19 in a long-term care facility in King County, Washington. *New England Journal of Medicine.*  
59 2020;382(21):2005-11.  
60  
61 135. Mei X, Zhang Y, Zhu H, Ling Y, Zou Y, Zhang Z, et al. Observations about symptomatic and  
asymptomatic infections of 494 patients with COVID-19 in Shanghai, China. *American Journal of*  
*Infection Control.* 2020;48(9):1045-50.

- 1  
2  
3  
4  
5  
6  
7  
8  
9  
10  
11  
12  
13  
14  
15  
16  
17  
18  
19  
20  
21  
22  
23  
24  
25  
26  
27  
28  
29  
30  
31  
32  
33  
34  
35  
36  
37  
38  
39  
40  
41  
42  
43  
44  
45  
46  
47  
48  
49  
50  
51  
52  
53  
54  
55  
56  
57  
58  
59  
60
136. Fassett MJ, Lurvey LD, Yasumura L, Nguyen M, Colli JJ, Volodarskiy M, et al. Universal SARS-Cov-2 screening in women admitted for delivery in a large managed care organization. *American journal of perinatology*. 2020;37(11):1110.
137. Bielecki M, Züst R, Siegrist D, Meyerhofer D, Cramer GAG, Stanga Z, et al. Social distancing alters the clinical course of COVID-19 in young adults: A comparative cohort study. *Clinical infectious diseases*. 2021;72(4):598-603.
138. Miyamae Y, Hayashi T, Yonezawa H, Fujihara J, Matsumoto Y, Ito T, et al. Duration of viral shedding in asymptomatic or mild cases of novel coronavirus disease 2019 (COVID-19) from a cruise ship: A single-hospital experience in Tokyo, Japan. *International Journal of Infectious Diseases*. 2020;97:293-5.
139. Ahmed MA, Colebunders R, Fodjo JNS. Evidence for significant COVID-19 community transmission in Somalia using a clinical case definition. *International Journal of Infectious Diseases*. 2020;98:206-7.
140. Moon SS, Park J, Lee K, Yun S, Lee YS, Lee DS. Clinical Characteristics and Mortality Predictors of COVID-19 Patients Hospitalized at Nationally-Designated Treatment Hospitals. *Journal of Korean medical science*. 2020;35(36):e328.
141. Moriarty LF, Plucinski MM, Marston BJ, Kurbatova EV, Knust B, Murray EL, et al. Public health responses to COVID-19 outbreaks on cruise ships—worldwide, February–March 2020. *Morbidity and Mortality Weekly Report*. 2020;69(12):347-52.
142. Nagler AR, Goldberg ER, Agüero-Rosenfeld ME, Cangiarella J, Kalkut G, Monahan CR, et al. Early results from SARS-CoV-2 PCR testing of healthcare workers at an Academic Medical Center in New York City. *Clinical Infectious Diseases*. 2020.
143. Parri N, Masi S, Magista AM, Marchetti F, Cantoni B, Arrighini A, et al. Characteristic of COVID-19 infection in pediatric patients: early findings from two Italian Pediatric Research Networks. *European journal of pediatrics*. 2020;179(8):1315-23.
144. Niu Y, Wang J. Clinical Characteristics and Prevention of COVID-19 in Suqian. *Linchuang Yanjiu*. 2020;28 (5):1-3.
145. Oduro-Mensah E, Tetteh J, Adomako I, Adjei-Mensah E, Yawson AE, Owoo C, et al. Clinical features of COVID-19 in Ghana: symptomatology, illness severity and comorbid non-communicable diseases. *Ghana medical journal*. 2020;54(4 Supplement):23-32.
146. Ou J, Ye W, Zhang K. Epidemiological characteristics of COVID-19 in Fujian Province. *China CHinese Journal of Zoonoses*. 2020;36 (5):366-71.
147. Pan X, Z H. Analysis on Chinese medical clinical characteristics of 64 patients with common type COVID-19. *Journal of Wenzhou Medical University*. 2020;50 (3):187-90.
148. Pérez-García F, Pérez-Zapata A, Arcos N, De la Mata M, Ortiz M, Simón E, et al. Severe acute respiratory coronavirus virus 2 (SARS-CoV-2) infection among hospital workers in a severely affected institution in Madrid, Spain: A surveillance cross-sectional study. *Infection control and hospital epidemiology*. 2020:1-7.
149. Pongpirul WA, Mott JA, Woodring JV, Uyeki TM, MacArthur JR, Vachiraphan A, et al. Clinical characteristics of patients hospitalized with coronavirus disease, Thailand. *Emerging infectious diseases*. 2020;26(7):1580-5.
150. Pongpirul WA, Wiboonchutikul S, Charoenpong L, Panitantum N, Vachiraphan A, Uttayamakul S, et al. Clinical course and potential predictive factors for pneumonia of adult patients with coronavirus disease 2019 (COVID-19): A retrospective observational analysis of 193 confirmed cases in Thailand.

- 1  
2  
3 PLoS Neglected Tropical Diseases. 2020;14(10):1-17.
- 4 151. Qiu C, Deng Z, Deng Y, Wang H, Zhao X, Zhou J, et al. Transmission and clinical characteristics  
5 of coronavirus disease 2019 in 104 outside-Wuhan patients, China. *Journal of Medical Virology*.  
6 2020;92(10):2027-35.
- 7 152. Redditt V, Wright V, Rashid M, Male R, Bogoch I. Outbreak of SARS-CoV-2 infection at a large  
8 refugee shelter in Toronto, April 2020: a clinical and epidemiologic descriptive analysis. *CMAJ open*.  
9 2020;8(4):E819-E24.
- 10 153. Shmakov RG, Prikhodko A, Polushkina E, Shmakova E, Pyregov A, Bychenko V, et al. Clinical  
11 course of novel COVID-19 infection in pregnant women. *The Journal of Maternal-Fetal & Neonatal*  
12 *Medicine*. 2020:1-7.
- 13 154. Rubbi I, Pasquinelli G, Brighenti A, Fanelli M, Gualandi P, Nanni E, et al. Healthcare personnel  
14 exposure to covid-19: An observational study on quarantined positive workers. *Acta Biomedica*.  
15 2020;91(12-S):1-14.
- 16 155. Mattar S, Martinez-Bravo C, Rivero R, Contreras H, Faccini-Martínez ÁA, Guzman-Teran C, et al.  
17 Epidemiological and viral features of a cohort of SARS-CoV-2 symptomatic and asymptomatic  
18 individuals in an area of the Colombian Caribbean. *Annals of Clinical Microbiology and*  
19 *Antimicrobials*. 2020;19(1):1-6.
- 20 156. Kim SE, Jeong HS, Yu Y, Shin SU, Kim S, Oh TH, et al. Viral kinetics of SARS-CoV-2 in  
21 asymptomatic carriers and presymptomatic patients. *International Journal of Infectious Diseases*.  
22 2020;95:441-3.
- 23 157. Samrah SM, Ibnian AM, Momany SM, Al-Ali M, Khassawneh BY, Al-Mistarehi A-HW, et al.  
24 COVID-19 outbreak in Jordan: Epidemiological features, clinical characteristics, and laboratory  
25 findings. *Annals of Medicine and Surgery*. 2020;57:103-8.
- 26 158. She X. Treatment analysis for the first 9 cases of pneumonia infected by novel coronavirus in  
27 Suining area. 2020;17 (2):52-5.
- 28 159. Son H, Lee H, Lee M, Eun Y, Park K, Kim S, et al. Epidemiological characteristics of and  
29 containment measures for COVID-19 in Busan, Korea. *Epidemiology and health*. 2020;42.
- 30 160. Song W, Li J, Zou N, Guan W, Pan J, Xu W. Clinical features of pediatric patients with  
31 coronavirus disease (COVID-19). *Journal of Clinical Virology*. 2020;127:104377.
- 32 161. Song YS, Hao YB, Liu WW, Zhang SS, Wang P, Fan TL. Clinical features of 17 patients with  
33 2019-nCoV. *European review for medical and pharmacological sciences*. 2020;24(20):10896-901.
- 34 162. Spiteri G, Fielding J, Diercke M, Campese C, Enouf V, Gaymard A, et al. First cases of  
35 coronavirus disease 2019 (COVID-19) in the WHO European Region, 24 January to 21 February 2020.  
36 *Eurosurveillance*. 2020;25(9):2000178.
- 37 163. Sun D. Clinical analysis of 30 cases of new coronavirus pneumonia. *Zhejiang Clinical Medical*  
38 *Journal*. 2020;22 (3):354-6.
- 39 164. Sun W, Ling F, Pan J, Cai J, Miao Z, Liu S, et al. Epidemiological characteristics of 2019 novel  
40 coronavirus family clustering in Zhejiang Province. *Zhonghua yu Fang yi xue za zhi [Chinese Journal*  
41 *of Preventive Medicine]*. 2020;54:E027-E.
- 42 165. Sun Z, Zhang Y, Yang J. Common Novel Coronavirus Pneumonia (COVID – 19): Clinical and  
43 Imaging Features. *Hebei Medicine*. 2020;26 (6):908-12.
- 44 166. Teng M, Tang SY, Koh CJ. Endoscopy during COVID-19 pandemic: An overview of infection  
45 control measures and practical application. *World journal of gastrointestinal endoscopy*.  
46 2020;12(9):256-65.
- 47  
48  
49  
50  
51  
52  
53  
54  
55  
56  
57  
58  
59  
60

- 1  
2  
3  
4 167. Tang O, Bigelow BF, Sheikh F, Peters M, Zenilman JM, Bennett R, et al. Outcomes of Nursing  
5 Home COVID-19 Patients by Initial Symptoms and Comorbidity: Results of Universal Testing of 1970  
6 Residents. *Journal of the American Medical Directors Association*. 2020;21(12):1767-73. e1.  
7  
8 168. Thiel Sarah L, Weber Myriam C, Karajan Tomas V, Sandra C, Matthias P, Nadia W, et al.  
9 Flattening the curve in 52 days: Characterisation of the COVID-19 pandemic in the Principality of  
10 Liechtenstein - an observational study. *Swiss Medical Weekly*. 2020;150(41-42):w20361.  
11  
12 169. Tian S, Zou X, Tian H, Xiao T, Xing J, Wu T, et al. Clinical Characteristics and Reasons for  
13 Differences in Duration From Symptom Onset to Release From Quarantine Among Patients With  
14 COVID-19 in Liaocheng, China. *Frontiers in Medicine*. 2020;7:210.  
15  
16 170. Tian S, Hu N, Lou J, Chen K, Kang X, Xiang Z, et al. Characteristics of COVID-19 infection in  
17 Beijing. *Journal of infection*. 2020;80(4):401-6.  
18  
19 171. Judson TJ, Odisho AY, Neinstein AB, Chao J, Williams A, Miller C, et al. Rapid design and  
20 implementation of an integrated patient self-triage and self-scheduling tool for COVID-19. *Journal of*  
21 *the American Medical Informatics Association*. 2020;27(6):860-6.  
22  
23 172. Tolia VM, Chan TC, Castillo EM. Preliminary results of initial testing for coronavirus  
24 (COVID-19) in the emergency department. *Western Journal of Emergency Medicine*. 2020;21(3):503.  
25  
26 173. He T, Yuanyuan X, Bo Y, Zewan Z, Song L. Value of HRCT in diagnosis of COVID-19.  
27 *INTERNATIONAL JOURNAL OF MEDICAL RADIOLOGY*. 2020;43(2):135.  
28  
29 174. Tong Z-D, Tang A, Li K-F, Li P, Wang H-L, Yi J-P, et al. Potential presymptomatic transmission  
30 of SARS-CoV-2, Zhejiang province, China, 2020. *Emerging infectious diseases*. 2020;26(5):1052.  
31  
32 175. Treibel TA, Manisty C, Augusto JB, Moon JC, Burton M, Lambourne J, et al. COVID-19: PCR  
33 screening of asymptomatic health-care workers at London hospital. *The Lancet*.  
34 2020;395(10237):1608-10.  
35  
36 176. Tsou T-P, Chen W-C, Huang AS-E, Chang S-C, Taiwan C-OIT. Epidemiology of the first 100  
37 cases of COVID-19 in Taiwan and its implications on outbreak control. *Journal of the Formosan*  
38 *Medical Association = Taiwan yi zhi*. 2020;119(11):1601-7.  
39  
40 177. London V, McLaren R, Atallah F, Cepeda C, McCalla S, Fisher N, et al. The Relationship between  
41 Status at Presentation and Outcomes among Pregnant Women with COVID-19. *American journal of*  
42 *perinatology*. 2020;37(10):991-4.  
43  
44 178. Wan R, Mao Z-Q, He L-Y, Hu Y-C. Evidence from two cases of asymptomatic infection with  
45 SARS-CoV-2: Are 14 days of isolation sufficient? *International journal of infectious diseases*.  
46 2020;95:174-5.  
47  
48 179. AH W, Long Q. Initial symptoms and epidemiological characteristics of confirmed cases of  
49 COVID-19 in the west of Chongqing. *Chinese Journal of Infect Control*. 2020;19 (3):234-8.  
50  
51 180. Deng W, Guang T-w, Yang M, Li J-r, Jiang D-p, Li C-y, et al. Positive results for patients with  
52 COVID-19 discharged form hospital in Chongqing, China. *BMC infectious diseases*. 2020;20(1):1-6.  
53  
54 181. Wang J, Liu J, Wang Y, Liu W, Chen X, Sun C, et al. Dynamic changes of chest CT imaging in  
55 patients with COVID-19. *Journal of Zhejiang University (Medical Sciences)*. 2020;49(2):191-7.  
56  
57 182. Zhou JH, Wu B, Wang WX, Lei F, Cheng X, Qin JJ, et al. No significant association between  
58 dipeptidyl peptidase-4 inhibitors and adverse outcomes of COVID-19. *World journal of clinical cases*.  
59 2020;8(22):5576-88.  
60  
61 183. Wang L, Cao H. Investigation and analysis of the characteristics of a family cluster of coronavirus  
62 disease 2019 in Zibo. *Journal Of Shandong University*. 2020;58 (10):100-4.  
63  
64 184. Wang L, Duan Y, Zhang W, Liang J, Xu J, Zhang Y, et al. Epidemiologic and clinical

- 1  
2  
3 characteristics of 26 cases of COVID-19 arising from patient-to-patient transmission in Liaocheng,  
4 China. *Clinical epidemiology*. 2020;12:387.
- 5  
6 185. Wang S, Liu X. Nucleic acid screening results of 738 close contacts of coronavirus disease 2019.  
7 *Chinese Journal of Infection Control* 2020. 2020;19 (4):297-300.
- 8  
9 186. Wang T, Shi L, Chen Y. Clinical Efficacy Analysis of 50 Cases of Corona Virus Disease 2019 in  
10 Traditional Chinese Medicine. *Jilin Journal of Chinese Medicine*. 2020;40 (3):281-5.
- 11  
12 187. Wang X, Fang J, Zhu Y, Chen L, Ding F, Zhou R, et al. Clinical characteristics of non-critically ill  
13 patients with novel coronavirus infection (COVID-19) in a Fangcang Hospital. *Clinical Microbiology  
14 and Infection*. 2020;26(8):1063-8.
- 15  
16 188. Gao W, Chen S, Wang K, Chen R, Guo Q, Lu J, et al. Clinical features and efficacy of antiviral  
17 drug, Arbidol in 220 nonemergency COVID-19 patients from East-West-Lake Shelter Hospital in  
18 Wuhan: a retrospective case series. *Virology journal*. 2020;17(1):162.
- 19  
20 189. Wang Z, Xiong G, Wang Z. Clinical characteristics and laboratory results of pregnant women with  
21 COVID-19 in Wuhan, China. *International Journal of Gynecology and Obstetrics*. 2020;150(3):312-7.
- 22  
23 190. Waya JLL, Mize V, Ambani B, Wamala JF, Guyo AG, Gray JH, et al. The first sixty days of  
24 COVID-19 in a humanitarian response setting: A descriptive epidemiological analysis of the outbreak  
25 in south Sudan. *Pan African Medical Journal*. 2020;37:384.
- 26  
27 191. Wong HYF, Lam HYS, Fong AH-T, Leung ST, Chin TW-Y, Lo CSY, et al. Frequency and  
28 distribution of chest radiographic findings in patients positive for COVID-19. *Radiology*.  
29 2020;296(2):E72-E8.
- 30  
31 192. Wong J, Alikhan MF, Chaw L, Naing L, Koh WC, Jamaludin SA, et al. Epidemiological  
32 investigation of the first 135 COVID-19 cases in Brunei: Implications for surveillance, control, and  
33 travel restrictions. *American Journal of Tropical Medicine and Hygiene*. 2020;103(4):1608-13.
- 34  
35 193. Wu G, Liu S, YX C. Epidemiological and clinical analysis of 104 patients with new coronavirus  
36 pneumonia. *Chinese Journal of Critical Care Medicine*. 2020;13 (2) (13 (2)):124-7.
- 37  
38 194. Wu H, Li B, Chen X. Clinical analysis of 23 cases of COVID-19 in children under 18 in Jiangxi.  
39 *Chinese Journal of Contemporary Pediatrics*. 2020;22 (5):419-24.
- 40  
41 195. Wu J, Song X, Gong X. Clinical analysis of 55 patients with COVID-19. *Jiangsu Medical Journal*.  
42 2020;46 (6):546-50.
- 43  
44 196. Xiaoqing W, Yuanliang X, Shutong Z, Jianpu C, Xiang W. Clinical characteristics, CT findings  
45 and AI application in pregnant women with COVID-19 pneumonia. *International Journal of Medical  
46 Radiology*. 2020;43(3):262.
- 47  
48 197. Wu Y, Huang S, Liu C. Analysis of laboratory test results of 23 cases of novel coronavirus  
49 pneumonia in Nantong area. *Medical Journal of Communications*. 2020;34 (2):115-6.
- 50  
51 198. Wu Y, Wei F, Li Q. The Epidemiological Characteristics of an Outbreak of 2019 Novel  
52 Coronavirus Diseases( COVID – 19) in Chegnde City. *Hebei Medicine*. 2020;26 (6):887-92.
- 53  
54 199. Xiang T, Liu J, Xu F, Cheng N, Liu Y, Qian K, et al. Analysis of clinical characteristics of 49  
55 patients with coronavirus disease 2019 in Jiangxi. *Chinese Journal of Respiratory and Critical Care  
56 Medicine*. 2020;19(2):154-60.
- 57  
58 200. Xie J, Jiang H. Analysis of the clustered epidemic situation of new coronavirus pneumonia units  
59 in 2019. 2020.
- 60  
201. Xie Y, Chen Q, Chen W. Discussion on CT Diagnosis of 39 Cases of Novel Coronavirus  
Pneumonia. *Zhejiang Journal of Integrated Traditional Chinese and Western Medicine*. 2020;30  
(6):437-9.

- 1  
2  
3  
4 202. Xu H, Liu E, Xie J, Smyth RL, Zhou Q, Zhao R, et al. A follow-up study of children infected with  
5 SARS-CoV-2 from Western China. *Annals of translational medicine*. 2020;8(10).
- 6 203. Xu S, Sun P, Shao F, Cui H, Yu C, Tang Z, et al. Clinical manifestation and neonatal outcomes of  
7 pregnant patients with coronavirus disease 2019 pneumonia in Wuhan, China. *Open Forum Infectious*  
8 *Diseases*. 2020;7(7):ofaa283.
- 9  
10 204. Xu T, Chen C, Zhu Z, Cui M, Chen C, Dai H, et al. Clinical features and dynamics of viral load in  
11 imported and non-imported patients with COVID-19. *International Journal of Infectious Diseases*.  
12 2020;94:68-71.
- 13  
14 205. Yan X, Han X, Peng D, Fan Y, Fang Z, Long D, et al. Clinical Characteristics and Prognosis of  
15 218 Patients With COVID-19: A Retrospective Study Based on Clinical Classification. *Frontiers in*  
16 *medicine*. 2020;7:485.
- 17  
18 206. Yang K, Xiao Y, Liu Y. Epidemiological and clinical characteristics of coronavirus disease 2019 in  
19 non-epidemic areas: report of 57 cases. *Acta Academiae Medicinae Militaris Tertiae*. 2020;42 (6):555-9.
- 20  
21 207. Yang N, Shen Y, Shi C, Ma AHY, Zhang X, Jian X, et al. In-flight transmission cluster of  
22 COVID-19: a retrospective case series. *Infectious diseases*. 2020;52(12):891-901.
- 23  
24 208. Yang R, Gui X, Xiong Y. Comparison of clinical characteristics of patients with asymptomatic vs  
25 symptomatic coronavirus disease 2019 in Wuhan, China. *JAMA network open*. 2020;3(5):e2010182-e.
- 26  
27 209. Yang Y, Li L, Li C. A survey on clustering of novel coronavirus disease in families in Fengjie  
28 county of Chongqing municipality. *Chinese Journal of Public Health*. 2020;36 (3):285-8.
- 29  
30 210. Yang Y, Ren C, Wang Y. Clinical Features of 88 Cases with Novel Coronavirus Pneumonia.  
31 *Journal of Kunming University*. 2020;42 (2):81-3.
- 32  
33 211. Yao Q, Zhang C, Fu J. HRCT feature and evolution rule of COVID - 19. *The Journal of Practical*  
34 *Medicine*. 2020;36 (12):1552-7.
- 35  
36 212. Yao X, Zhao X. Familial clustering infection caused by asymptomatic COVID-19. *International*  
37 *Journal of Respiration*. 2020;40 (13):982-7.
- 38  
39 213. Yayla BCC, Aykac K, Ozsurekci Y, Ceyhan M. Characteristics and Management of Children With  
40 COVID-19 in a Tertiary Care Hospital in Turkey. *Clinical Pediatrics*. 2021;60(3):170-7.
- 41  
42 214. Ye X, Xie Y, Chen Q. 3 CT diagnosis of clustered new coronavirus pneumonia. *Zhejiang Medical*  
43 *Journal*. 2020;42 (4):395-7.
- 44  
45 215. Ye Y, Fan W, Wang W. Difference in epidemic characteristics between asymptomatic infected  
46 persons and confirmed cases in COVID-19 clustered epidemics. *Chinese Journal of Infection Control*.  
47 2020;19 (6):492-7.
- 48  
49 216. Yu F, Yan L, Wang N, Yang S, Wang L, Tang Y, et al. Quantitative detection and viral load  
50 analysis of SARS-CoV-2 in infected patients. *Clinical Infectious Diseases*. 2020;71(15):793-8.
- 51  
52 217. JX Y. Epidemiological and clinical characteristics analysis of 87 patients with novel coronavirus  
53 pneumonia in Hangzhou. *Zhejiang Clinical Medical Journal*. 2020:318-24.
- 54  
55 218. Yu X, Yu Y, WH Y. Analysis of the nucleic acid detection results of 2019 Novel Coronavirus in  
56 108 inpatients. *Chinese Journal of New Clinical Medicine*. 2020;13 (5):448-52.
- 57  
58 219. Yuan L, Zhang J. Clinical characteristics and prognostic analysis of COVID-19 infection in 28  
59 pregnant women. *Journal of Xinjiang Medical University*. 2020;43 (4):449-57.
- 60  
220. Yue H, Bai X, Yu Q, Liu W, Pu J, Wang X, et al. Clinical characteristics of coronavirus disease  
2019 in Gansu province, China. *Annals of palliative medicine*. 2020;9(4):1404-12.
221. Zeng J, Qiu L, Zou Y, Zhang G, Wu X, Xu X, et al. Epidemiological outcome of close contacts of  
coronavirus disease 2019 cases in Sichuan province. *Chinese Journal of Public Health*.

- 2020;36(4):503-6.
222. Zeng W, Liu B, Jin Y. Clinical characteristics of 44 patients with coronavirus disease 2019 in Yongzhou. *Journal of Hainan Medical University*. 2020;26 (13):967-71.
223. Yang W, Teng X. Clinical analysis of 11 children with COVID-19. *Journal of Bengbu Medical College*. 2020;45 (6):708-11.
224. Zhan H, SX B. Diagnosis and Treatment of Novel Coronavirus Pneumonia in Children. *Journal of Hubei University of Medicine*. 2020;39 (3).
225. Zhan T, Liu M, Han Z, Chen X, Tian X, Huang X, et al. Retrospective analysis of clinical characteristics of 405 patients with COVID-19. *Journal of International Medical Research*. 2020;48(8).
226. Zhang J, Tian S, Lou J, Chen Y. Familial cluster of COVID-19 infection from an asymptomatic. *Critical care*. 2020;24(1):1-3.
227. Zhang K, Zhang L, Li M. Clinical features comparative analysis on familial aggregation cases of imported and local coronavirus disease 2019. *Chinese Journal of Integrated Traditional and Western Medicine in Intensive and Critical Care*. 2020;27 (4):385-9.
228. Zhang L, Huang S. Clinical Features of 33 Cases in Children Infected With SARS-CoV-2 in Anhui Province, China—A Multi-Center Retrospective Cohort Study. *Frontiers in Public Health*. 2020;8:255.
229. Zhang R, Li Y, Yu L, Ma X, Tong S, Yan J, et al. Infection risk and its influencing factors among close contacts of patients with novel coronavirus diseases 2019 in Liaoning province. *Chinese Journal of Public Health*. 2020;36:477-80.
230. Zhang Y, Xing L-H, Ni Z-Y, Yin X-P, Gao B-L, Xie R-M, et al. Clinical and imaging features of pediatric COVID-19. *Italian Journal of Pediatrics*. 2020;46(1):153.
231. Yongchen Z, Shen H, Wang X, Shi X, Li Y, Yan J, et al. Different longitudinal patterns of nucleic acid and serology testing results based on disease severity of COVID-19 patients. *Emerging microbes & infections*. 2020;9(1):833-6.
232. Zhang Y. Epidemiological Characteristics and Characteristics of Infection of 18 Confirmed Cases of Corona Virus Disease 2019 in Qinghai Province, China. *Chinese Journal of Nosocomiology*. 2020;30 (10):1475-9.
233. Zhao L, Xue J, Wang Y. Comparative study of imported and local clinical features of COVID-19 patients in Shijiazhuang. *Shandong Medical Journal*. 2020;60 (15):10-3.
234. Zhang Z, Bin Y. Coronavirus disease 2019: clinical characteristics and therapeutic effect analysis of 193 cases. *Chinese Journal OF Difficut and Complicated Cases*. 2020;19 (6):559-62.
235. Zhou H, Yuan J, Yang G. Preliminary Study on Treatment and Diagnosis of Integrated Traditional Chinese and Western Medicine of 13 Patients with NCP in Qujing Area. *Chinese Journal of Ethnomedicine and Ethnopharmacy*. 2020;29 (5):55-8.
236. Zhou L, Hunag H. Epidemiological characteristics of clustering outbreaks of 51 cases of COVID-19 in Xinyang, He'nan. *China Tropical Medicine*. 2020;20 (11):1078-81.
237. Zhou R, Li F, Chen F, Liu H, Zheng J, Lei C, et al. Viral dynamics in asymptomatic patients with COVID-19. *International Journal of Infectious Diseases*. 2020;96:288-90.
238. Zhu J, Zhang Q, Jia C, Wang W, Chen J, Xia Y, et al. Epidemiological Characteristics and Clinical Outcomes of Coronavirus Disease Patients in Northwest China: High-Volume Research From Low Population Density Regions. *Frontiers in medicine*. 2020;7:775.
239. Zhu M, Zeng Y. Clinical characteristics of 77 COVID-19 cases imported from abroad. *Fudan University Journal of Medicine Science*. 2020;47 (6):888-91.

1  
2  
3  
4  
5  
6  
7  
8  
9  
10  
11  
12  
13  
14  
15  
16  
17  
18  
19  
20  
21  
22  
23  
24  
25  
26  
27  
28  
29  
30  
31  
32  
33  
34  
35  
36  
37  
38  
39  
40  
41  
42  
43  
44  
45  
46  
47  
48  
49  
50  
51  
52  
53  
54  
55  
56  
57  
58  
59  
60

240. Zhu S, Fan Z. Epidemiological features of COVID-19 in Shenzhen city based on network resources. Chinese Journal of Hygiene Rescue. 2020;6 (3):148-54.

For peer review only



**Supplementary Table 3 Quality assessment of selected articles**

|                              | Introduction |   |   | Methods |   |   |   |   |   |    | Results |    |    |    |    | Discussion |    | Other |    |    |
|------------------------------|--------------|---|---|---------|---|---|---|---|---|----|---------|----|----|----|----|------------|----|-------|----|----|
|                              | 1            | 2 | 3 | 4       | 5 | 6 | 7 | 8 | 9 | 10 | 11      | 12 | 13 | 14 | 15 | 16         | 17 | 18    | 19 | 20 |
| Abey Suriya Sanduni          | Y            | Y | N | Y       | Y | Y | Y | Y | Y | Y  | Y       | Y  | Y  | Y  | NM | Y          | Y  | Y     | N  | N  |
| Adedeji Idris Abiodun        | Y            | Y | N | Y       | Y | Y | Y | Y | Y | Y  | Y       | Y  | Y  | Y  | NM | Y          | Y  | Y     | N  | Y  |
| Adetola Hammed Hassan        | Y            | Y | N | Y       | Y | Y | Y | Y | Y | N  | Y       | Y  | Y  | Y  | NM | Y          | Y  | Y     | N  | NM |
| Aherfi Sarah                 | Y            | Y | N | Y       | Y | Y | Y | Y | Y | Y  | Y       | Y  | Y  | Y  | NM | Y          | Y  | Y     | N  | Y  |
| Almazeedi Sulaiman           | Y            | Y | N | Y       | Y | Y | Y | Y | Y | Y  | Y       | Y  | Y  | Y  | NM | Y          | Y  | Y     | N  | Y  |
| Alshahrani Mohammed S        | Y            | Y | N | Y       | Y | Y | Y | Y | Y | Y  | Y       | Y  | Y  | Y  | NM | Y          | Y  | Y     | N  | Y  |
| Alshukry Abdullah            | Y            | Y | N | Y       | Y | Y | Y | Y | Y | Y  | Y       | Y  | Y  | Y  | NM | Y          | Y  | Y     | N  | NM |
| Alsofayan Yousef M           | Y            | Y | N | Y       | Y | Y | Y | Y | Y | Y  | Y       | Y  | Y  | Y  | NM | Y          | Y  | Y     | N  | NM |
| Alvin J Ing                  | Y            | Y | N | Y       | Y | Y | Y | Y | Y | N  | Y       | Y  | Y  | Y  | NM | Y          | Y  | N     | NM | NM |
| Amy V. Dora                  | Y            | Y | N | Y       | Y | Y | Y | Y | Y | N  | Y       | Y  | Y  | Y  | NM | Y          | Y  | Y     | N  | NM |
| An YH                        | Y            | Y | N | Y       | Y | Y | Y | Y | Y | Y  | Y       | Y  | Y  | Y  | Y  | Y          | Y  | N     | NM | NM |
| Andrea Lombardi              | Y            | Y | N | Y       | Y | Y | Y | Y | Y | Y  | Y       | Y  | Y  | Y  | Y  | Y          | Y  | Y     | N  | Y  |
| Antonio-Villa Nefali Eduardo | Y            | Y | N | Y       | Y | Y | Y | Y | Y | Y  | Y       | Y  | Y  | Y  | NM | Y          | Y  | Y     | N  | NM |
| Arima                        | Y            | Y | N | Y       | Y | Y | Y | Y | Y | N  | Y       | Y  | Y  | Y  | NM | Y          | Y  | Y     | NM | Y  |
| Ashinyo Mary Eyram           | Y            | Y | N | Y       | Y | Y | Y | Y | Y | Y  | Y       | Y  | Y  | Y  | Y  | Y          | Y  | N     | N  | Y  |
| Atakla Hugues Ghislain       | Y            | Y | N | Y       | Y | Y | Y | Y | Y | N  | Y       | Y  | Y  | Y  | NM | Y          | Y  | Y     | N  | N  |
| Backer JA                    | Y            | Y | N | Y       | Y | Y | Y | Y | Y | Y  | Y       | Y  | Y  | Y  | NM | Y          | Y  | N     | N  | NM |
| Bai M                        | Y            | Y | N | Y       | Y | Y | Y | Y | Y | Y  | Y       | Y  | Y  | Y  | Y  | Y          | Y  | N     | NM | NM |
| Bai R                        | Y            | Y | N | Y       | Y | Y | Y | Y | Y | N  | Y       | Y  | Y  | Y  | NM | Y          | Y  | N     | N  | NM |
| Bai SL                       | Y            | Y | N | Y       | Y | Y | Y | Y | Y | N  | Y       | Y  | Y  | Y  | NM | Y          | Y  | N     | N  | NM |
| BHAKTI SARANGI               | Y            | Y | N | Y       | Y | Y | Y | Y | Y | Y  | Y       | Y  | Y  | Y  | NM | Y          | Y  | Y     | N  | Y  |

1  
2  
3  
4  
5  
6  
7  
8  
9  
10  
11  
12  
13  
14  
15  
16  
17  
18  
19  
20  
21  
22  
23  
24  
25  
26  
27  
28  
29  
30  
31  
32  
33  
34  
35  
36  
37  
38  
39  
40  
41  
42  
43  
44  
45  
46

|                                                      |    |   |   |   |   |   |   |   |    |   |   |   |   |   |    |   |   |   |    |    |
|------------------------------------------------------|----|---|---|---|---|---|---|---|----|---|---|---|---|---|----|---|---|---|----|----|
| Bianco Angela                                        | Y  | Y | N | Y | Y | Y | Y | Y | Y  | Y | Y | Y | Y | Y | NM | Y | Y | Y | N  | NM |
| Bin YF                                               | Y  | Y | N | Y | Y | Y | Y | Y | NM | Y | Y | Y | Y | Y | NM | Y | Y | N | NM | NM |
| Blain Hubert                                         | Y  | Y | N | Y | Y | Y | Y | Y | Y  | Y | Y | Y | Y | Y | Y  | Y | Y | N | N  | N  |
| Böhmer MM                                            | Y  | Y | N | Y | Y | Y | Y | Y | NM | Y | Y | Y | Y | Y | Y  | Y | Y | Y | NM | NM |
| Breslin Noelle                                       | Y  | Y | N | Y | Y | Y | Y | Y | Y  | N | Y | Y | Y | Y | NM | Y | Y | Y | N  | NM |
| Bruminhent Jackrapong                                | Y  | Y | N | Y | Y | Y | Y | Y | Y  | Y | Y | Y | N | Y | NM | Y | Y | Y | N  | Y  |
| Cai Jiehao                                           | Y  | Y | N | Y | Y | Y | Y | Y | Y  | Y | Y | Y | Y | Y | Y  | Y | Y | Y | N  | Y  |
| Cao JM                                               | Y  | Y | N | Y | Y | Y | Y | Y | Y  | N | Y | Y | Y | Y | Y  | Y | Y | N | NM | NM |
| Carla Felice                                         | Y  | Y | N | Y | Y | Y | Y | Y | NM | Y | Y | Y | Y | Y | NM | Y | Y | Y | N  | Y  |
| Chan JFW                                             | Y  | Y | N | Y | Y | Y | Y | Y | NM | Y | Y | Y | Y | Y | NM | Y | Y | Y | N  | NM |
| Chen B                                               | Y  | Y | N | Y | Y | Y | Y | Y | Y  | N | Y | Y | Y | Y | Y  | Y | Y | N | NM | NM |
| Chen J                                               | Y  | Y | N | Y | Y | Y | Y | Y | Y  | Y | Y | Y | Y | Y | Y  | Y | Y | Y | N  | Y  |
| Chen T                                               | Y  | Y | N | Y | Y | Y | Y | Y | Y  | N | Y | Y | Y | Y | NM | Y | Y | N | NM | NM |
| Chen Y                                               | Y  | Y | N | Y | Y | Y | Y | Y | NM | Y | Y | Y | Y | Y | NM | Y | Y | N | N  | Y  |
| Chen YJ                                              | Y  | Y | N | Y | Y | Y | Y | Y | Y  | Y | Y | Y | Y | Y | NM | Y | Y | Y | NM | NM |
| Cheng ZP                                             | Y  | Y | N | Y | Y | Y | Y | Y | Y  | Y | N | Y | Y | Y | NM | Y | Y | Y | N  | Y  |
| Choe PG                                              | Y  | Y | N | Y | Y | Y | Y | Y | Y  | Y | Y | Y | Y | Y | Y  | Y | Y | N | N  | Y  |
| COVID-19 National Incident Room<br>Surveillance Team | NM | Y | N | Y | Y | Y | Y | Y | NM | N | Y | Y | Y | Y | NM | Y | N | N | NM | NM |
| Dai Y                                                | Y  | Y | N | Y | Y | Y | Y | Y | Y  | N | Y | Y | Y | Y | Y  | Y | Y | N | NM | NM |
| Daniela Loconsole                                    | Y  | Y | N | Y | Y | Y | Y | Y | Y  | N | Y | Y | Y | Y | NM | Y | Y | Y | N  | NM |
| Ding Y                                               | Y  | Y | N | Y | Y | Y | Y | Y | Y  | N | Y | Y | Y | Y | NM | Y | Y | N | NM | NM |
| Dong X                                               | Y  | Y | N | Y | Y | Y | Y | Y | Y  | N | Y | Y | Y | Y | NM | Y | Y | N | NM | NM |
| Dong XC                                              | Y  | Y | N | Y | Y | Y | Y | Y | Y  | Y | Y | Y | Y | Y | NM | Y | Y | N | N  | NM |
| Dong YY                                              | Y  | Y | N | Y | Y | Y | Y | Y | Y  | Y | Y | Y | Y | Y | Y  | Y | Y | Y | NM | NM |

|    |                        |   |   |   |   |   |   |   |   |   |   |   |   |   |    |   |   |   |    |    |
|----|------------------------|---|---|---|---|---|---|---|---|---|---|---|---|---|----|---|---|---|----|----|
| 1  |                        |   |   |   |   |   |   |   |   |   |   |   |   |   |    |   |   |   |    |    |
| 2  |                        |   |   |   |   |   |   |   |   |   |   |   |   |   |    |   |   |   |    |    |
| 3  |                        |   |   |   |   |   |   |   |   |   |   |   |   |   |    |   |   |   |    |    |
| 4  |                        |   |   |   |   |   |   |   |   |   |   |   |   |   |    |   |   |   |    |    |
| 5  | Erinoso Olufemi A.     | Y | Y | N | Y | Y | Y | Y | Y | Y | Y | Y | Y | Y | NM | Y | Y | Y | N  | Y  |
| 6  | Eythorsson Elias       | Y | Y | N | Y | Y | Y | Y | Y | N | Y | Y | Y | Y | NM | Y | Y | Y | N  | Y  |
| 7  | Fakiri EL K            | Y | Y | N | Y | Y | Y | Y | Y | N | Y | Y | Y | Y | Y  | Y | Y | N | N  | Y  |
| 8  | Fan YZ                 | Y | Y | N | Y | Y | Y | Y | Y | N | Y | Y | Y | Y | NM | Y | Y | N | NM | NM |
| 9  | Feaster Matt           | Y | Y | N | Y | Y | Y | Y | Y | N | Y | Y | Y | Y | NM | Y | Y | Y | NM | NM |
| 10 | Feng XP                | Y | Y | N | Y | Y | Y | Y | Y | Y | Y | Y | Y | Y | NM | Y | Y | Y | NM | Y  |
| 11 | Foster Catherine E.    | Y | Y | N | Y | Y | Y | Y | Y | N | Y | Y | Y | Y | NM | Y | Y | Y | N  | NM |
| 12 | Friederike Maechler    | Y | Y | N | Y | Y | Y | Y | Y | Y | Y | Y | Y | Y | NM | Y | Y | Y | N  | Y  |
| 13 | Gao HJ                 | Y | Y | N | Y | Y | Y | Y | Y | Y | Y | Y | Y | Y | Y  | Y | Y | N | N  | NM |
| 14 | Gao T                  | Y | Y | N | Y | Y | Y | Y | Y | Y | Y | Y | Y | Y | NM | Y | Y | N | NM | NM |
| 15 | Gautret P              | Y | Y | N | Y | Y | Y | Y | Y | Y | Y | Y | Y | Y | Y  | Y | Y | Y | N  | Y  |
| 16 | Gill Livingston        | Y | Y | N | Y | Y | Y | Y | Y | Y | Y | Y | Y | Y | NM | Y | Y | Y | N  | Y  |
| 17 | Grados Isabel Zumalave | Y | Y | N | Y | Y | Y | Y | Y | N | Y | Y | Y | Y | NM | Y | Y | N | N  | NM |
| 18 | Graham N.S.N.          | Y | Y | N | Y | Y | Y | Y | Y | Y | Y | Y | Y | Y | Y  | Y | Y | Y | N  | Y  |
| 19 | Grechukhina Olga       | Y | Y | N | Y | Y | Y | Y | Y | Y | Y | Y | Y | Y | Y  | Y | Y | Y | N  | NM |
| 20 | Gu. Kim                | Y | Y | N | Y | Y | Y | Y | Y | N | Y | Y | Y | Y | NM | Y | Y | Y | N  | NM |
| 21 | Guo CX                 | Y | Y | N | Y | Y | Y | Y | Y | N | Y | Y | Y | Y | NM | Y | Y | Y | N  | Y  |
| 22 | Han RD                 | Y | Y | N | Y | Y | Y | Y | Y | N | Y | Y | Y | Y | NM | Y | Y | Y | NM | NM |
| 23 | He M                   | Y | Y | N | Y | Y | Y | Y | Y | N | Y | Y | Y | Y | NM | Y | Y | Y | N  | Y  |
| 24 | He WB                  | Y | Y | N | Y | Y | Y | Y | Y | N | Y | Y | Y | Y | NM | Y | Y | N | NM | NM |
| 25 | Hu SX                  | Y | Y | N | Y | Y | Y | Y | Y | Y | Y | Y | Y | Y | NM | Y | Y | Y | NM | NM |
| 26 | Huang DD               | Y | Y | N | Y | Y | Y | Y | Y | Y | Y | Y | Y | Y | NM | Y | Y | N | NM | NM |
| 27 | IH Huerta Saenz        | Y | Y | N | Y | Y | Y | Y | Y | Y | Y | Y | Y | Y | NM | Y | Y | N | N  | NM |
| 28 | Ipekci A               | Y | Y | N | Y | Y | Y | Y | Y | N | Y | Y | Y | Y | NM | Y | Y | Y | N  | Y  |
| 29 | Irene Petersen         | Y | Y | N | Y | Y | Y | Y | Y | Y | Y | Y | Y | Y | NM | Y | Y | N | N  | Y  |
| 30 |                        |   |   |   |   |   |   |   |   |   |   |   |   |   |    |   |   |   |    |    |
| 31 |                        |   |   |   |   |   |   |   |   |   |   |   |   |   |    |   |   |   |    |    |
| 32 |                        |   |   |   |   |   |   |   |   |   |   |   |   |   |    |   |   |   |    |    |
| 33 |                        |   |   |   |   |   |   |   |   |   |   |   |   |   |    |   |   |   |    |    |
| 34 |                        |   |   |   |   |   |   |   |   |   |   |   |   |   |    |   |   |   |    |    |
| 35 |                        |   |   |   |   |   |   |   |   |   |   |   |   |   |    |   |   |   |    |    |
| 36 |                        |   |   |   |   |   |   |   |   |   |   |   |   |   |    |   |   |   |    |    |
| 37 |                        |   |   |   |   |   |   |   |   |   |   |   |   |   |    |   |   |   |    |    |
| 38 |                        |   |   |   |   |   |   |   |   |   |   |   |   |   |    |   |   |   |    |    |
| 39 |                        |   |   |   |   |   |   |   |   |   |   |   |   |   |    |   |   |   |    |    |
| 40 |                        |   |   |   |   |   |   |   |   |   |   |   |   |   |    |   |   |   |    |    |
| 41 |                        |   |   |   |   |   |   |   |   |   |   |   |   |   |    |   |   |   |    |    |
| 42 |                        |   |   |   |   |   |   |   |   |   |   |   |   |   |    |   |   |   |    |    |
| 43 |                        |   |   |   |   |   |   |   |   |   |   |   |   |   |    |   |   |   |    |    |
| 44 |                        |   |   |   |   |   |   |   |   |   |   |   |   |   |    |   |   |   |    |    |
| 45 |                        |   |   |   |   |   |   |   |   |   |   |   |   |   |    |   |   |   |    |    |
| 46 |                        |   |   |   |   |   |   |   |   |   |   |   |   |   |    |   |   |   |    |    |

1  
2  
3  
4  
5  
6  
7  
8  
9  
10  
11  
12  
13  
14  
15  
16  
17  
18  
19  
20  
21  
22  
23  
24  
25  
26  
27  
28  
29  
30  
31  
32  
33  
34  
35  
36  
37  
38  
39  
40  
41  
42  
43  
44  
45  
46

|                    |   |   |   |   |   |   |   |   |    |   |   |   |   |   |    |   |   |   |    |    |
|--------------------|---|---|---|---|---|---|---|---|----|---|---|---|---|---|----|---|---|---|----|----|
| Jennifer S. Singer | Y | Y | N | Y | Y | Y | Y | Y | Y  | N | Y | Y | Y | Y | NM | Y | Y | Y | N  | NM |
| Jeong SJ           | Y | Y | N | Y | Y | Y | Y | Y | Y  | Y | Y | Y | Y | Y | Y  | Y | Y | Y | N  | NM |
| Jha S              | Y | Y | N | Y | Y | Y | Y | Y | NM | N | Y | Y | Y | Y | NM | Y | Y | Y | NM | NM |
| Ji GH              | Y | Y | N | Y | Y | Y | Y | Y | Y  | N | Y | Y | Y | Y | NM | Y | Y | N | NM | NM |
| Ji T               | Y | Y | N | Y | Y | Y | Y | Y | Y  | N | Y | Y | Y | Y | NM | Y | Y | Y | N  | Y  |
| Jia CY             | Y | Y | N | Y | Y | Y | Y | Y | Y  | Y | Y | Y | Y | Y | NM | Y | Y | N | NM | NM |
| Jiang CH           | Y | Y | N | Y | Y | Y | Y | Y | Y  | Y | Y | Y | Y | Y | NM | Y | Y | Y | N  | Y  |
| Jiang R            | Y | Y | N | Y | Y | Y | Y | Y | Y  | N | Y | Y | Y | Y | Y  | Y | Y | N | NM | NM |
| Jibrin YB          | Y | Y | N | Y | Y | Y | Y | Y | Y  | N | Y | Y | Y | Y | NM | Y | Y | Y | N  | Y  |
| Jin MH             | Y | Y | N | Y | Y | Y | Y | Y | Y  | N | Y | Y | Y | Y | NM | Y | Y | N | NM | NM |
| Jung CY            | Y | Y | N | Y | Y | Y | Y | Y | Y  | N | Y | Y | Y | Y | NM | Y | Y | N | N  | NM |
| Kang M             | Y | Y | N | Y | Y | Y | Y | Y | Y  | Y | Y | Y | Y | Y | Y  | Y | Y | N | NM | Y  |
| Kasper MR          | Y | Y | N | Y | Y | Y | Y | Y | Y  | Y | Y | Y | Y | Y | NM | Y | Y | N | NM | NM |
| Ke B               | Y | Y | N | Y | Y | Y | Y | Y | Y  | Y | Y | Y | Y | Y | NM | Y | Y | Y | N  | NM |
| Kenu E             | Y | Y | N | Y | Y | Y | Y | Y | Y  | N | Y | Y | Y | Y | NM | Y | Y | Y | N  | Y  |
| Ki M               | Y | Y | N | Y | Y | Y | Y | Y | NM | Y | Y | Y | Y | Y | NM | Y | Y | N | N  | Y  |
| Kirenga Bruce      | Y | Y | N | Y | Y | Y | Y | Y | Y  | Y | Y | Y | Y | Y | NM | Y | Y | Y | N  | Y  |
| Kong WF            | Y | Y | N | Y | Y | Y | Y | Y | Y  | Y | Y | Y | Y | Y | NM | Y | Y | Y | N  | Y  |
| Krajcar N          | Y | Y | N | Y | Y | Y | Y | Y | Y  | Y | Y | Y | Y | Y | NM | Y | Y | Y | N  | Y  |
| Kristin J. Meyers  | Y | Y | N | Y | Y | Y | Y | Y | Y  | Y | Y | Y | Y | Y | NM | Y | Y | Y | N  | Y  |
| Kumar R            | Y | Y | N | Y | Y | Y | Y | Y | Y  | Y | Y | Y | Y | Y | Y  | Y | Y | Y | N  | Y  |
| Ladhani Shamez N   | Y | Y | N | Y | Y | Y | Y | Y | Y  | Y | Y | Y | Y | Y | NM | Y | Y | Y | N  | Y  |
| Lai XQ             | Y | Y | N | Y | Y | Y | Y | Y | NM | Y | Y | Y | Y | Y | NM | Y | Y | Y | N  | Y  |
| Le TQM             | Y | Y | N | Y | Y | Y | Y | Y | Y  | N | Y | Y | Y | Y | NM | Y | Y | N | NM | NM |
| Lee YH             | Y | Y | N | Y | Y | Y | Y | Y | Y  | Y | Y | Y | Y | Y | NM | Y | Y | Y | NM | NM |

|    |             |   |   |   |   |   |   |   |   |   |   |   |   |   |    |   |   |   |    |    |
|----|-------------|---|---|---|---|---|---|---|---|---|---|---|---|---|----|---|---|---|----|----|
| 1  |             |   |   |   |   |   |   |   |   |   |   |   |   |   |    |   |   |   |    |    |
| 2  |             |   |   |   |   |   |   |   |   |   |   |   |   |   |    |   |   |   |    |    |
| 3  |             |   |   |   |   |   |   |   |   |   |   |   |   |   |    |   |   |   |    |    |
| 4  |             |   |   |   |   |   |   |   |   |   |   |   |   |   |    |   |   |   |    |    |
| 5  | Lei MY      | Y | Y | N | Y | Y | Y | Y | Y | N | Y | Y | Y | Y | NM | Y | Y | N | NM | NM |
| 6  | Lewis Megan | Y | Y | N | Y | Y | Y | Y | Y | Y | Y | Y | Y | Y | N  | Y | Y | Y | N  | NM |
| 7  |             |   |   |   |   |   |   |   |   |   |   |   |   |   |    |   |   |   |    |    |
| 8  | Li CY       | Y | Y | N | Y | Y | Y | Y | Y | N | Y | Y | Y | Y | NM | Y | N | N | NM | NM |
| 9  | Li JH       | Y | Y | N | Y | Y | Y | Y | Y | Y | Y | Y | Y | Y | Y  | Y | Y | Y | NM | Y  |
| 10 | Li W        | Y | Y | N | Y | Y | Y | Y | Y | N | Y | Y | Y | Y | NM | Y | Y | N | N  | Y  |
| 11 | Li Y        | Y | Y | N | Y | Y | Y | Y | Y | N | Y | Y | Y | Y | NM | Y | Y | N | NM | Y  |
| 12 |             |   |   |   |   |   |   |   |   |   |   |   |   |   |    |   |   |   |    |    |
| 13 | Li Y        | Y | Y | N | Y | Y | Y | Y | Y | Y | Y | Y | Y | Y | NM | Y | Y | Y | N  | Y  |
| 14 | Li YL       | Y | Y | N | Y | Y | Y | Y | Y | Y | Y | Y | Y | Y | NM | Y | Y | Y | N  | Y  |
| 15 |             |   |   |   |   |   |   |   |   |   |   |   |   |   |    |   |   |   |    |    |
| 16 | Liao XN     | Y | Y | N | Y | Y | Y | Y | Y | Y | Y | Y | Y | Y | NM | Y | Y | N | NM | NM |
| 17 | Lin S       | Y | Y | N | Y | Y | Y | Y | Y | Y | Y | Y | Y | Y | Y  | Y | Y | Y | N  | Y  |
| 18 |             |   |   |   |   |   |   |   |   |   |   |   |   |   |    |   |   |   |    |    |
| 19 | Lin XM      | Y | Y | N | Y | Y | Y | Y | Y | Y | Y | Y | Y | Y | NM | Y | Y | Y | NM | NM |
| 20 | Lin ZF      | Y | Y | N | Y | Y | Y | Y | Y | Y | Y | Y | Y | Y | NM | Y | Y | Y | NM | NM |
| 21 | Liu B       | Y | Y | N | Y | Y | Y | Y | Y | N | Y | Y | Y | Y | NM | Y | Y | N | NM | NM |
| 22 |             |   |   |   |   |   |   |   |   |   |   |   |   |   |    |   |   |   |    |    |
| 23 | Liu BM      | Y | Y | N | Y | Y | Y | Y | Y | Y | Y | Y | Y | Y | NM | Y | Y | N | N  | Y  |
| 24 | Liu BY      | Y | Y | N | Y | Y | Y | Y | Y | N | Y | Y | Y | Y | NM | Y | Y | N | NM | NM |
| 25 | Liu DH      | Y | Y | N | Y | Y | Y | Y | Y | N | Y | Y | Y | Y | NM | Y | Y | Y | NM | Y  |
| 26 |             |   |   |   |   |   |   |   |   |   |   |   |   |   |    |   |   |   |    |    |
| 27 | Liu F       | Y | Y | N | Y | Y | Y | Y | Y | Y | Y | Y | Y | Y | Y  | Y | Y | Y | N  | Y  |
| 28 | Liu F       | Y | Y | N | Y | Y | Y | Y | Y | N | Y | Y | Y | Y | NM | Y | Y | N | NM | Y  |
| 29 | Liu GT      | Y | Y | N | Y | Y | Y | Y | Y | Y | Y | Y | Y | Y | NM | Y | Y | Y | NM | Y  |
| 30 | Liu MQ      | Y | Y | N | Y | Y | Y | Y | Y | N | Y | Y | Y | Y | Y  | Y | N | N | N  | NM |
| 31 |             |   |   |   |   |   |   |   |   |   |   |   |   |   |    |   |   |   |    |    |
| 32 | Liu X       | Y | Y | N | Y | Y | Y | Y | Y | N | Y | Y | Y | Y | NM | Y | Y | N | NM | NM |
| 33 | Liu XX      | Y | Y | N | Y | Y | Y | Y | Y | Y | Y | Y | Y | Y | NM | Y | Y | N | NM | NM |
| 34 | Liu YL      | Y | Y | N | Y | Y | Y | Y | Y | N | Y | Y | Y | Y | NM | Y | Y | N | N  | NM |
| 35 | Liu YX      | Y | Y | N | Y | Y | Y | Y | Y | Y | Y | Y | Y | Y | Y  | Y | Y | N | N  | Y  |
| 36 | Liu ZR      | Y | Y | N | Y | Y | Y | Y | Y | N | Y | Y | Y | Y | NM | Y | Y | Y | N  | NM |
| 37 |             |   |   |   |   |   |   |   |   |   |   |   |   |   |    |   |   |   |    |    |
| 38 |             |   |   |   |   |   |   |   |   |   |   |   |   |   |    |   |   |   |    |    |
| 39 |             |   |   |   |   |   |   |   |   |   |   |   |   |   |    |   |   |   |    |    |
| 40 |             |   |   |   |   |   |   |   |   |   |   |   |   |   |    |   |   |   |    |    |
| 41 |             |   |   |   |   |   |   |   |   |   |   |   |   |   |    |   |   |   |    |    |
| 42 |             |   |   |   |   |   |   |   |   |   |   |   |   |   |    |   |   |   |    |    |
| 43 |             |   |   |   |   |   |   |   |   |   |   |   |   |   |    |   |   |   |    |    |
| 44 |             |   |   |   |   |   |   |   |   |   |   |   |   |   |    |   |   |   |    |    |
| 45 |             |   |   |   |   |   |   |   |   |   |   |   |   |   |    |   |   |   |    |    |
| 46 |             |   |   |   |   |   |   |   |   |   |   |   |   |   |    |   |   |   |    |    |

1  
2  
3  
4  
5  
6  
7  
8  
9  
10  
11  
12  
13  
14  
15  
16  
17  
18  
19  
20  
21  
22  
23  
24  
25  
26  
27  
28  
29  
30  
31  
32  
33  
34  
35  
36  
37  
38  
39  
40  
41  
42  
43  
44  
45  
46

|                    |   |   |   |   |   |   |   |   |    |   |   |   |    |    |    |   |   |    |    |    |
|--------------------|---|---|---|---|---|---|---|---|----|---|---|---|----|----|----|---|---|----|----|----|
| Lu RF              | Y | Y | N | Y | Y | Y | Y | Y | Y  | N | Y | Y | Y  | Y  | NM | Y | Y | Y  | N  | Y  |
| Lu XX              | Y | Y | N | Y | Y | Y | Y | Y | Y  | N | Y | Y | Y  | Y  | NM | Y | N | N  | NM | NM |
| Lu Y               | Y | Y | N | Y | Y | Y | Y | Y | NM | N | Y | Y | Y  | Y  | NM | Y | Y | Y  | N  | Y  |
| Lucy Rivett        | Y | Y | N | Y | Y | Y | Y | Y | Y  | Y | Y | Y | Y  | Y  | NM | Y | Y | Y  | N  | Y  |
| Luo SH             | Y | Y | N | Y | Y | Y | Y | N | Y  | N | Y | Y | Y  | Y  | Y  | Y | N | N  | N  | Y  |
| M.M. Arons         | Y | Y | N | Y | Y | Y | Y | Y | Y  | N | Y | Y | Y  | Y  | NM | Y | Y | Y  | NM | NM |
| Ma MM              | Y | Y | N | Y | Y | Y | Y | Y | Y  | Y | Y | Y | Y  | Y  | Y  | Y | Y | Y  | NM | NM |
| Ma Y               | Y | Y | N | Y | Y | Y | Y | Y | Y  | Y | Y | Y | Y  | Y  | NM | Y | Y | Y  | N  | Y  |
| Ma YL              | Y | Y | N | Y | Y | Y | Y | Y | Y  | Y | Y | Y | Y  | Y  | NM | Y | Y | N  | NM | NM |
| MacIntyre CR       | Y | Y | N | Y | Y | Y | Y | N | Y  | N | Y | Y | Y  | Y  | NM | Y | N | N  | N  | NM |
| Mahesh C. Patel    | Y | Y | N | Y | Y | Y | Y | Y | Y  | Y | Y | Y | Y  | Y  | Y  | Y | Y | Y  | N  | Y  |
| Martin C           | Y | Y | N | Y | Y | Y | Y | Y | Y  | N | Y | Y | Y  | Y  | NM | Y | Y | Y  | NM | Y  |
| Maru Sheela        | Y | Y | N | Y | Y | Y | Y | Y | Y  | Y | Y | Y | Y  | Y  | Y  | Y | Y | Y  | N  | Y  |
| McMichael TM       | Y | Y | N | Y | Y | Y | Y | Y | Y  | N | Y | Y | Y  | Y  | NM | Y | Y | Y  | NM | NM |
| Mei X              | Y | Y | N | Y | Y | Y | Y | Y | Y  | Y | Y | Y | Y  | Y  | NM | Y | Y | Y  | N  | Y  |
| Michael J. Fassett | Y | Y | N | Y | Y | Y | Y | Y | Y  | Y | Y | Y | Y  | Y  | NM | Y | Y | Y  | N  | NM |
| Michel Bielecki    | Y | Y | N | Y | Y | Y | Y | Y | Y  | N | Y | Y | Y  | Y  | NM | Y | Y | Y  | N  | Y  |
| Miyamae Y          | Y | Y | N | Y | Y | Y | Y | Y | Y  | N | Y | Y | Y  | Y  | NM | Y | Y | N  | N  | Y  |
| Mohammed A M Ahmed | Y | Y | N | Y | Y | Y | Y | Y | NM | Y | Y | Y | NM | NM | NM | Y | Y | Y  | N  | Y  |
| Moon SS            | Y | Y | N | Y | Y | Y | Y | Y | Y  | Y | Y | Y | Y  | Y  | NM | Y | Y | Y  | N  | Y  |
| Moriarty LF        | Y | Y | N | Y | Y | Y | Y | Y | Y  | N | Y | Y | Y  | Y  | NM | Y | Y | NM | N  | NM |
| Nagler AR          | Y | Y | N | Y | Y | Y | Y | Y | Y  | N | Y | Y | Y  | Y  | NM | Y | Y | N  | N  | NM |
| Niccolò Parri      | Y | Y | N | Y | Y | Y | Y | Y | Y  | Y | Y | Y | Y  | Y  | NM | Y | Y | Y  | N  | Y  |
| Niu YL             | Y | Y | N | Y | Y | Y | Y | Y | Y  | N | Y | Y | Y  | Y  | Y  | Y | Y | N  | NM | NM |
| Oduro-Mensah E     | Y | Y | N | Y | Y | Y | Y | Y | Y  | Y | Y | Y | Y  | Y  | NM | Y | Y | Y  | N  | Y  |

|    |                  |   |   |   |   |   |   |   |   |    |   |   |   |   |    |   |   |    |    |    |
|----|------------------|---|---|---|---|---|---|---|---|----|---|---|---|---|----|---|---|----|----|----|
| 1  |                  |   |   |   |   |   |   |   |   |    |   |   |   |   |    |   |   |    |    |    |
| 2  |                  |   |   |   |   |   |   |   |   |    |   |   |   |   |    |   |   |    |    |    |
| 3  |                  |   |   |   |   |   |   |   |   |    |   |   |   |   |    |   |   |    |    |    |
| 4  |                  |   |   |   |   |   |   |   |   |    |   |   |   |   |    |   |   |    |    |    |
| 5  | Ou JM            | Y | Y | N | Y | Y | Y | Y | Y | N  | Y | Y | Y | Y | NM | Y | Y | N  | N  | NM |
| 6  | Pan XQ           | Y | Y | N | Y | Y | Y | Y | Y | N  | Y | Y | Y | Y | NM | Y | Y | N  | NM | Y  |
| 7  | Pérez-GarcíaF    | Y | Y | N | Y | Y | Y | Y | Y | Y  | Y | Y | Y | Y | NM | Y | Y | Y  | N  | Y  |
| 8  | Pongpirul W      | Y | Y | N | Y | Y | Y | Y | Y | Y  | Y | Y | Y | Y | Y  | Y | Y | Y  | N  | Y  |
| 9  | Pongpirul WA     | Y | Y | N | Y | Y | Y | Y | Y | Y  | Y | Y | Y | Y | Y  | Y | Y | Y  | N  | Y  |
| 10 | Qiu CF           | Y | Y | N | Y | Y | Y | Y | Y | Y  | Y | Y | Y | Y | NM | Y | Y | Y  | N  | Y  |
| 11 | Redditt V        | Y | Y | N | Y | Y | Y | Y | Y | N  | Y | Y | Y | Y | NM | Y | Y | Y  | N  | Y  |
| 12 | Roman G. Shmakov | Y | Y | N | Y | Y | Y | Y | Y | Y  | Y | Y | Y | Y | NM | Y | Y | Y  | N  | NM |
| 13 | Rubbi I          | Y | Y | N | Y | Y | Y | Y | Y | NM | Y | Y | Y | Y | NM | Y | Y | N  | N  | NM |
| 14 | Salim Mattar     | Y | Y | N | Y | Y | Y | Y | Y | N  | Y | Y | Y | Y | NM | Y | Y | N  | NM | Y  |
| 15 | Seong Eun Kim    | Y | Y | N | Y | Y | Y | Y | Y | N  | Y | Y | Y | Y | NM | Y | Y | N  | N  | Y  |
| 16 | Shaher M. Samrah | Y | Y | N | Y | Y | Y | Y | Y | Y  | Y | Y | Y | Y | NM | Y | Y | Y  | N  | Y  |
| 17 | She X            | Y | Y | N | Y | Y | Y | Y | Y | N  | Y | Y | Y | Y | Y  | Y | Y | N  | NM | NM |
| 18 | Son H            | Y | Y | N | Y | Y | Y | Y | Y | Y  | Y | Y | Y | Y | NM | Y | Y | N  | N  | Y  |
| 19 | Song W           | Y | Y | N | Y | Y | Y | Y | Y | N  | Y | Y | Y | Y | NM | Y | Y | Y  | N  | NM |
| 20 | Song YS          | Y | Y | N | Y | Y | Y | Y | Y | NM | N | Y | Y | Y | NM | Y | Y | N  | N  | Y  |
| 21 | Spiteri G        | Y | Y | N | Y | Y | Y | Y | Y | Y  | Y | Y | Y | Y | NM | Y | Y | N  | N  | NM |
| 22 | Sun DF           | Y | Y | N | Y | Y | Y | Y | Y | N  | Y | Y | Y | Y | NM | Y | Y | N  | NM | NM |
| 23 | Sun WW           | Y | Y | N | Y | Y | Y | Y | N | Y  | Y | Y | Y | Y | NM | Y | Y | NM | NM | NM |
| 24 | Sun Z            | Y | Y | N | Y | Y | Y | Y | Y | Y  | Y | Y | Y | Y | NM | Y | Y | N  | NM | NM |
| 25 | Tang A           | Y | Y | N | Y | Y | Y | Y | Y | N  | Y | Y | Y | Y | NM | Y | Y | N  | NM | NM |
| 26 | Tang Olive       | Y | Y | N | Y | Y | Y | Y | Y | Y  | Y | Y | Y | Y | Y  | Y | Y | Y  | N  | NM |
| 27 | Thiel SL         | Y | Y | N | Y | Y | Y | Y | Y | Y  | Y | Y | Y | Y | NM | Y | Y | Y  | N  | NM |
| 28 | Tian SC          | Y | Y | N | Y | Y | Y | Y | Y | Y  | Y | Y | Y | Y | NM | Y | Y | Y  | N  | Y  |
| 29 | Tian SJ          | Y | Y | N | Y | Y | Y | Y | Y | Y  | Y | Y | Y | Y | NM | Y | Y | Y  | N  | Y  |
| 30 |                  |   |   |   |   |   |   |   |   |    |   |   |   |   |    |   |   |    |    |    |
| 31 |                  |   |   |   |   |   |   |   |   |    |   |   |   |   |    |   |   |    |    |    |
| 32 |                  |   |   |   |   |   |   |   |   |    |   |   |   |   |    |   |   |    |    |    |
| 33 |                  |   |   |   |   |   |   |   |   |    |   |   |   |   |    |   |   |    |    |    |
| 34 |                  |   |   |   |   |   |   |   |   |    |   |   |   |   |    |   |   |    |    |    |
| 35 |                  |   |   |   |   |   |   |   |   |    |   |   |   |   |    |   |   |    |    |    |
| 36 |                  |   |   |   |   |   |   |   |   |    |   |   |   |   |    |   |   |    |    |    |
| 37 |                  |   |   |   |   |   |   |   |   |    |   |   |   |   |    |   |   |    |    |    |
| 38 |                  |   |   |   |   |   |   |   |   |    |   |   |   |   |    |   |   |    |    |    |
| 39 |                  |   |   |   |   |   |   |   |   |    |   |   |   |   |    |   |   |    |    |    |
| 40 |                  |   |   |   |   |   |   |   |   |    |   |   |   |   |    |   |   |    |    |    |
| 41 |                  |   |   |   |   |   |   |   |   |    |   |   |   |   |    |   |   |    |    |    |
| 42 |                  |   |   |   |   |   |   |   |   |    |   |   |   |   |    |   |   |    |    |    |
| 43 |                  |   |   |   |   |   |   |   |   |    |   |   |   |   |    |   |   |    |    |    |
| 44 |                  |   |   |   |   |   |   |   |   |    |   |   |   |   |    |   |   |    |    |    |
| 45 |                  |   |   |   |   |   |   |   |   |    |   |   |   |   |    |   |   |    |    |    |
| 46 |                  |   |   |   |   |   |   |   |   |    |   |   |   |   |    |   |   |    |    |    |

1  
2  
3  
4  
5  
6  
7  
8  
9  
10  
11  
12  
13  
14  
15  
16  
17  
18  
19  
20  
21  
22  
23  
24  
25  
26  
27  
28  
29  
30  
31  
32  
33  
34  
35  
36  
37  
38  
39  
40  
41  
42  
43  
44  
45  
46

|                   |   |   |   |   |   |   |   |   |    |   |   |   |   |   |    |   |   |    |    |    |
|-------------------|---|---|---|---|---|---|---|---|----|---|---|---|---|---|----|---|---|----|----|----|
| Timothy J. Judson | Y | Y | N | Y | Y | Y | Y | Y | NM | Y | Y | Y | Y | Y | NM | Y | Y | Y  | N  | NM |
| Tolia VM          | Y | Y | N | Y | Y | Y | Y | Y | Y  | Y | Y | Y | Y | Y | NM | Y | Y | Y  | N  | NM |
| Tong H            | Y | Y | N | Y | Y | Y | Y | Y | Y  | N | Y | Y | Y | Y | NM | Y | Y | N  | NM | NM |
| Tong ZD           | Y | Y | N | Y | Y | Y | Y | Y | Y  | N | Y | Y | Y | Y | Y  | Y | Y | Y  | NM | Y  |
| Treibel TA        | Y | Y | N | Y | Y | Y | Y | Y | Y  | N | Y | Y | Y | Y | NM | Y | Y | N  | NM | NM |
| Tsou Tsung-Pei    | Y | Y | N | Y | Y | Y | Y | Y | Y  | N | Y | Y | Y | Y | NM | Y | Y | Y  | N  | Y  |
| Viktoriya London  | Y | Y | N | Y | Y | Y | Y | Y | Y  | Y | Y | Y | Y | Y | NM | Y | Y | Y  | N  | NM |
| Wan R             | Y | Y | N | Y | Y | Y | Y | Y | Y  | N | Y | Y | Y | Y | NM | Y | Y | Y  | N  | Y  |
| Wang AH           | Y | Y | N | Y | Y | Y | Y | Y | Y  | Y | Y | Y | Y | Y | Y  | Y | Y | N  | NM | Y  |
| Wang D            | Y | Y | N | Y | Y | Y | Y | Y | Y  | N | Y | Y | Y | Y | NM | Y | Y | Y  | N  | Y  |
| Wang JC           | Y | Y | N | Y | Y | Y | Y | Y | Y  | N | Y | Y | Y | Y | Y  | Y | Y | N  | NM | NM |
| Wang KS           | Y | Y | N | Y | Y | Y | Y | Y | NM | Y | Y | Y | Y | Y | Y  | Y | Y | NM | NM | NM |
| Wang L            | Y | Y | N | Y | Y | Y | Y | Y | Y  | N | Y | Y | Y | Y | NM | Y | Y | Y  | NM | NM |
| Wang LZ           | Y | Y | N | Y | Y | Y | Y | Y | Y  | N | Y | Y | Y | Y | NM | Y | Y | Y  | N  | Y  |
| Wang S            | Y | Y | N | Y | Y | Y | Y | Y | Y  | N | Y | Y | Y | Y | NM | Y | Y | N  | NM | NM |
| Wang T            | Y | Y | N | Y | Y | Y | Y | Y | NM | N | Y | Y | Y | Y | NM | Y | Y | N  | NM | NM |
| Wang XB           | Y | Y | N | Y | Y | Y | Y | Y | NM | Y | Y | Y | Y | Y | NM | Y | Y | Y  | N  | Y  |
| Wang XL           | Y | Y | N | Y | Y | Y | Y | Y | Y  | Y | Y | Y | Y | Y | NM | Y | Y | Y  | N  | Y  |
| Wang ZQ           | Y | Y | N | Y | Y | Y | Y | Y | Y  | Y | Y | Y | Y | Y | Y  | Y | Y | Y  | N  | Y  |
| Waya JLL          | Y | Y | N | Y | Y | Y | Y | Y | Y  | N | Y | Y | Y | Y | NM | Y | Y | Y  | N  | Y  |
| Wong HYF          | Y | Y | N | Y | Y | Y | Y | Y | Y  | Y | Y | Y | Y | Y | NM | Y | Y | Y  | NM | NM |
| Wong J            | Y | Y | N | Y | Y | Y | Y | Y | Y  | Y | Y | Y | Y | Y | NM | Y | Y | Y  | NM | Y  |
| Wu GY             | Y | Y | N | Y | Y | Y | Y | Y | Y  | Y | Y | Y | Y | Y | Y  | Y | Y | N  | NM | Y  |
| Wu HP             | Y | Y | N | Y | Y | Y | Y | Y | Y  | N | Y | Y | Y | Y | Y  | Y | Y | N  | NM | NM |
| Wu QR             | Y | Y | N | Y | Y | Y | Y | Y | Y  | N | Y | Y | Y | Y | NM | Y | Y | Y  | NM | NM |



|    |  |                         |   |   |   |   |   |   |   |   |    |   |   |   |   |    |   |   |    |    |    |
|----|--|-------------------------|---|---|---|---|---|---|---|---|----|---|---|---|---|----|---|---|----|----|----|
| 1  |  |                         |   |   |   |   |   |   |   |   |    |   |   |   |   |    |   |   |    |    |    |
| 2  |  |                         |   |   |   |   |   |   |   |   |    |   |   |   |   |    |   |   |    |    |    |
| 3  |  |                         |   |   |   |   |   |   |   |   |    |   |   |   |   |    |   |   |    |    |    |
| 4  |  |                         |   |   |   |   |   |   |   |   |    |   |   |   |   |    |   |   |    |    |    |
| 5  |  | Wu XQ                   | Y | Y | N | Y | Y | Y | Y | Y | Y  | Y | Y | Y | Y | Y  | Y | N | NM | NM |    |
| 6  |  | Wu Y                    | Y | Y | N | Y | Y | Y | Y | Y | N  | Y | Y | Y | Y | NM | Y | Y | N  | NM | NM |
| 7  |  | Wu YL                   | Y | Y | N | Y | Y | Y | Y | Y | Y  | Y | Y | Y | Y | NM | Y | Y | N  | NM | NM |
| 8  |  | Wu YL                   | Y | Y | N | Y | Y | Y | Y | Y | Y  | Y | Y | Y | Y | NM | Y | Y | N  | NM | NM |
| 9  |  | Xiang TX                | Y | Y | N | Y | Y | Y | Y | Y | NM | Y | Y | Y | Y | NM | Y | Y | N  | N  | NM |
| 10 |  | Xie JW                  | Y | Y | N | Y | Y | Y | Y | Y | Y  | Y | Y | Y | Y | NM | Y | Y | Y  | NM | NM |
| 11 |  | Xie JW                  | Y | Y | N | Y | Y | Y | Y | Y | Y  | Y | Y | Y | Y | NM | Y | Y | Y  | NM | NM |
| 12 |  | Xie YB                  | Y | Y | N | Y | Y | Y | Y | Y | N  | Y | Y | Y | Y | NM | Y | Y | N  | NM | NM |
| 13 |  | Xu HM                   | Y | Y | N | Y | Y | Y | Y | Y | Y  | Y | Y | Y | Y | NM | Y | Y | Y  | N  | Y  |
| 14 |  | Xu S                    | Y | Y | N | Y | Y | Y | Y | Y | Y  | Y | Y | Y | Y | NM | Y | Y | Y  | N  | Y  |
| 15 |  | Xu S                    | Y | Y | N | Y | Y | Y | Y | Y | Y  | Y | Y | Y | Y | NM | Y | Y | Y  | N  | Y  |
| 16 |  | Xu TM                   | Y | Y | N | Y | Y | Y | Y | Y | Y  | Y | Y | Y | Y | NM | Y | Y | Y  | N  | NM |
| 17 |  | Yan XQ                  | Y | Y | N | Y | Y | Y | Y | Y | Y  | Y | Y | Y | Y | NM | Y | Y | Y  | N  | Y  |
| 18 |  | Yan XQ                  | Y | Y | N | Y | Y | Y | Y | Y | Y  | Y | Y | Y | Y | NM | Y | Y | Y  | N  | Y  |
| 19 |  | Yang K                  | Y | Y | N | Y | Y | Y | Y | Y | NM | N | Y | Y | Y | NM | Y | Y | N  | NM | NM |
| 20 |  | Yang NB                 | Y | Y | N | Y | Y | Y | Y | Y | Y  | N | Y | Y | Y | NM | Y | Y | Y  | N  | Y  |
| 21 |  | Yang RR                 | Y | Y | N | Y | Y | Y | Y | Y | Y  | Y | Y | Y | Y | NM | Y | Y | Y  | N  | Y  |
| 22 |  | Yang RR                 | Y | Y | N | Y | Y | Y | Y | Y | Y  | Y | Y | Y | Y | NM | Y | Y | Y  | N  | Y  |
| 23 |  | Yang YL                 | Y | Y | N | Y | Y | Y | Y | Y | N  | Y | Y | Y | Y | NM | Y | Y | N  | NM | NM |
| 24 |  | Yang YX                 | Y | Y | N | Y | Y | Y | Y | Y | N  | Y | Y | Y | Y | NM | Y | Y | N  | NM | NM |
| 25 |  | Yang YX                 | Y | Y | N | Y | Y | Y | Y | Y | N  | Y | Y | Y | Y | NM | Y | Y | N  | NM | NM |
| 26 |  | Yao QD                  | Y | Y | N | Y | Y | Y | Y | Y | Y  | Y | Y | Y | Y | Y  | Y | Y | Y  | NM | NM |
| 27 |  | Yao XY                  | Y | Y | N | Y | Y | Y | Y | Y | Y  | Y | Y | Y | Y | Y  | Y | Y | Y  | NM | Y  |
| 28 |  | Yao XY                  | Y | Y | N | Y | Y | Y | Y | Y | Y  | Y | Y | Y | Y | Y  | Y | Y | Y  | NM | Y  |
| 29 |  | Yayla Burcu Ceylan Cura | Y | Y | N | Y | Y | Y | Y | Y | Y  | Y | Y | Y | Y | NM | Y | Y | Y  | N  | Y  |
| 30 |  | Ye XX                   | Y | Y | N | Y | Y | Y | Y | Y | NM | N | Y | Y | Y | NM | Y | Y | N  | NM | NM |
| 31 |  | Ye Y                    | Y | Y | N | Y | Y | Y | Y | Y | Y  | Y | Y | Y | Y | NM | Y | Y | Y  | NM | NM |
| 32 |  | Yu FT                   | Y | Y | N | Y | Y | Y | Y | Y | Y  | Y | Y | Y | Y | Y  | Y | Y | Y  | N  | NM |
| 33 |  | Yu FT                   | Y | Y | N | Y | Y | Y | Y | Y | Y  | Y | Y | Y | Y | Y  | Y | Y | Y  | N  | NM |
| 34 |  | Yu JX                   | Y | Y | N | Y | Y | Y | Y | Y | NM | N | Y | Y | Y | NM | Y | Y | N  | NM | Y  |
| 35 |  | Yu X                    | Y | Y | N | Y | Y | Y | Y | Y | Y  | Y | Y | Y | Y | Y  | Y | Y | N  | NM | NM |
| 36 |  | Yuan L                  | Y | Y | N | Y | Y | Y | Y | Y | Y  | Y | Y | Y | Y | NM | Y | Y | N  | NM | NM |
| 37 |  | Yuan L                  | Y | Y | N | Y | Y | Y | Y | Y | Y  | Y | Y | Y | Y | NM | Y | Y | N  | NM | NM |
| 38 |  | Yue HM                  | Y | Y | N | Y | Y | Y | Y | Y | Y  | Y | Y | Y | Y | NM | Y | Y | Y  | N  | Y  |
| 39 |  |                         |   |   |   |   |   |   |   |   |    |   |   |   |   |    |   |   |    |    |    |
| 40 |  |                         |   |   |   |   |   |   |   |   |    |   |   |   |   |    |   |   |    |    |    |
| 41 |  |                         |   |   |   |   |   |   |   |   |    |   |   |   |   |    |   |   |    |    |    |
| 42 |  |                         |   |   |   |   |   |   |   |   |    |   |   |   |   |    |   |   |    |    |    |
| 43 |  |                         |   |   |   |   |   |   |   |   |    |   |   |   |   |    |   |   |    |    |    |
| 44 |  |                         |   |   |   |   |   |   |   |   |    |   |   |   |   |    |   |   |    |    |    |
| 45 |  |                         |   |   |   |   |   |   |   |   |    |   |   |   |   |    |   |   |    |    |    |
| 46 |  |                         |   |   |   |   |   |   |   |   |    |   |   |   |   |    |   |   |    |    |    |

1  
2  
3  
4  
5  
6  
7  
8  
9  
10  
11  
12  
13  
14  
15  
16  
17  
18  
19  
20  
21  
22  
23  
24  
25  
26  
27  
28  
29  
30  
31  
32  
33  
34  
35  
36  
37  
38  
39  
40  
41  
42  
43  
44  
45  
46

|          |   |   |   |   |   |   |   |   |    |   |   |   |   |   |    |   |   |   |    |    |
|----------|---|---|---|---|---|---|---|---|----|---|---|---|---|---|----|---|---|---|----|----|
| Zeng J   | Y | Y | N | Y | Y | Y | Y | Y | Y  | Y | Y | Y | Y | Y | NM | Y | Y | N | NM | NM |
| Zeng WZ  | Y | Y | N | Y | Y | Y | Y | Y | Y  | Y | Y | Y | Y | Y | Y  | Y | Y | N | NM | NM |
| Zhai HL  | Y | Y | N | Y | Y | Y | Y | Y | Y  | N | Y | Y | Y | Y | NM | Y | Y | N | NM | NM |
| Zhan H   | Y | Y | N | Y | Y | Y | Y | Y | Y  | N | Y | Y | Y | Y | NM | Y | Y | N | NM | NM |
| Zhan T   | Y | Y | N | Y | Y | Y | Y | Y | Y  | Y | Y | Y | Y | Y | NM | Y | Y | Y | N  | Y  |
| Zhang JJ | Y | Y | N | Y | Y | Y | Y | N | NM | N | Y | Y | Y | Y | NM | Y | N | N | N  | Y  |
| Zhang KY | Y | Y | N | Y | Y | Y | Y | Y | Y  | N | Y | Y | Y | Y | Y  | Y | Y | N | N  | Y  |
| Zhang L  | Y | Y | N | Y | Y | Y | Y | Y | Y  | Y | Y | Y | Y | Y | Y  | Y | Y | N | N  | Y  |
| Zhang R  | Y | Y | N | Y | Y | Y | Y | Y | Y  | Y | Y | Y | Y | Y | NM | Y | Y | N | NM | NM |
| Zhang Y  | Y | Y | N | Y | Y | Y | Y | Y | Y  | Y | Y | Y | Y | Y | NM | Y | Y | Y | N  | Y  |
| Zhang YC | Y | Y | N | Y | Y | Y | Y | Y | Y  | N | Y | Y | Y | Y | Y  | Y | Y | Y | NM | Y  |
| Zhang YD | Y | Y | N | Y | Y | Y | Y | Y | Y  | N | Y | Y | Y | Y | NM | Y | Y | N | NM | NM |
| Zhao L   | Y | Y | N | Y | Y | Y | Y | Y | Y  | Y | Y | Y | Y | Y | Y  | Y | Y | N | NM | NM |
| Zhong ZM | Y | Y | N | Y | Y | Y | Y | Y | Y  | N | Y | Y | Y | Y | Y  | Y | Y | N | N  | NM |
| Zhou H   | Y | Y | N | Y | Y | Y | Y | Y | Y  | N | Y | Y | Y | Y | NM | Y | Y | N | NM | NM |
| Zhou JL  | Y | Y | N | Y | Y | Y | Y | Y | Y  | N | Y | Y | Y | Y | NM | Y | Y | N | NM | NM |
| Zhou R   | Y | Y | N | Y | Y | Y | Y | Y | Y  | N | Y | Y | Y | Y | NM | Y | Y | N | NM | Y  |
| Zhu JF   | Y | Y | N | Y | Y | Y | Y | Y | Y  | Y | Y | Y | Y | Y | NM | Y | Y | Y | N  | Y  |
| Zhu MR   | Y | Y | N | Y | Y | Y | Y | Y | Y  | Y | Y | Y | Y | Y | NM | Y | Y | N | NM | NM |
| Zhu SQ   | Y | Y | N | Y | Y | Y | Y | Y | Y  | N | Y | Y | Y | Y | NM | Y | Y | Y | NM | NM |

Y, Yes; N, Not; NM, not mentioned.

1  
2  
3 According to quality of cross-sectional studies (AXIS) scale (Downes MJ, Brennan  
4 ML, Williams HC, Dean RS. Development of a critical appraisal tool to assess the  
5 quality of cross-sectional studies (AXIS). *BMJ open* 2016; **6**(12): e011458.):  
6  
7

8  
9 *Introduction*

10 1. Were the aims/objectives of the study clear?  
11

12  
13 *Methods*

14 2. Was the study design appropriate for the stated aim(s)?

15 3. Was the sample size justified?

16 4. Was the target/reference population clearly defined? (Is it clear who the research  
17 was about?)

18 5. Was the sample frame taken from an appropriate population base so that it  
19 closely represented the target/reference population under investigation?

20 6. Was the selection process likely to select subjects/participants that were  
21 representative of the target/reference population under investigation?

22 7. Were measures undertaken to address and categorise non-responders?

23 8. Were the risk factor and outcome variables measured appropriate to the aims of  
24 the study?

25 9. Were the risk factor and outcome variables measured correctly using instruments/  
26 measurements that had been trialled, piloted or published previously?

27 10. Is it clear what was used to determined statistical significance and/or precision  
28 estimates? (eg, p values, CIs)

29 11. Were the methods (including statistical methods) sufficiently described to  
30 enable them to be repeated?  
31

32  
33  
34  
35  
36  
37  
38 *Results*

39 12. Were the basic data adequately described?

40 13. Does the response rate raise concerns about non-response bias?

41 14. If appropriate, was information about non-responders described?

42 15. Were the results internally consistent?

43 16. Were the results for the analyses described in the methods, presented?  
44  
45  
46

47  
48  
49  
50  
51  
52  
53 *Discussion*

54 17. Were the authors' discussions and conclusions justified by the results?

55 18. Were the limitations of the study discussed?  
56  
57  
58  
59  
60

*Other*

19. Were there any funding sources or conflicts of interest that may affect the  
authors' interpretation of the results?

20. Was ethical approval or consent of participants attained?

**Supplementary Table 4 Results of sensitivity analysis**

| <b>Study omitted</b>                              | <b>Estimate</b> | <b>[95% Conf. Interval]</b> |           |
|---------------------------------------------------|-----------------|-----------------------------|-----------|
| Abey Suriya Sanduni                               | 0.24138328      | 0.2359522                   | 0.2468143 |
| Adedeji Idris Abiodun                             | 0.24126983      | 0.2358378                   | 0.2467018 |
| Adetola Hammed Hassan                             | 0.24140392      | 0.2359729                   | 0.246835  |
| Aherfi Sarah                                      | 0.24146682      | 0.2360346                   | 0.246899  |
| Almazeedi Sulaiman                                | 0.2395409       | 0.234087                    | 0.2449948 |
| Alshahrani Mohammed S                             | 0.24135832      | 0.2359271                   | 0.2467896 |
| Alshukry Abdullah                                 | 0.24093036      | 0.235491                    | 0.24637   |
| Alsofayan Yousef M                                | 0.2423633       | 0.236915                    | 0.247811  |
| Alvin J Ing                                       | 0.24085474      | 0.235421                    | 0.246288  |
| Amy V. Dora                                       | 0.2414076       | 0.235976                    | 0.246839  |
| An YH                                             | 0.24142824      | 0.235997                    | 0.246859  |
| Andrea Lombardi                                   | 0.24154645      | 0.236113                    | 0.24698   |
| Antonio-Villa Neftali Eduardo                     | 0.26132575      | 0.2556445                   | 0.267007  |
| Arima                                             | 0.24140991      | 0.2359788                   | 0.2468411 |
| Ashinyo Mary Eyram                                | 0.2399627       | 0.2345254                   | 0.2454    |
| Atakla Hugues Ghislain                            | 0.24140076      | 0.2359691                   | 0.2468324 |
| Backer JA                                         | 0.24156743      | 0.236135                    | 0.247     |
| Bai M                                             | 0.24201234      | 0.236572                    | 0.247453  |
| Bai R                                             | 0.24144937      | 0.236016                    | 0.246883  |
| Bai SL                                            | 0.24139151      | 0.23596                     | 0.246823  |
| Bhakti Sarangi                                    | 0.24128741      | 0.235855                    | 0.246719  |
| Bianco Angela                                     | 0.2414328       | 0.236001                    | 0.246864  |
| Bin YF                                            | 0.24151391      | 0.236082                    | 0.246946  |
| Blain Hubert                                      | 0.24141634      | 0.235985                    | 0.246848  |
| Böhmer                                            | 0.24143349      | 0.236002                    | 0.246865  |
| Breslin Noelle                                    | 0.24139062      | 0.235959                    | 0.246822  |
| Bruminhent Jackrapong                             | 0.24150243      | 0.2360704                   | 0.2469344 |
| Cai Jiehao                                        | 0.24134758      | 0.235916                    | 0.246779  |
| Cao JM                                            | 0.24137202      | 0.235941                    | 0.246803  |
| Carla Felice                                      | 0.24140568      | 0.235974                    | 0.246837  |
| Chan JFW                                          | 0.24142247      | 0.235991                    | 0.246853  |
| Chen B                                            | 0.24150895      | 0.236077                    | 0.246941  |
| Chen J                                            | 0.24182814      | 0.236392                    | 0.247264  |
| Chen T                                            | 0.24148329      | 0.236051                    | 0.246916  |
| Chen Y                                            | 0.24154295      | 0.236108                    | 0.246978  |
| Chen YJ                                           | 0.24160017      | 0.236166                    | 0.247034  |
| Cheng ZP                                          | 0.24145818      | 0.236027                    | 0.24689   |
| Choe PG                                           | 0.2412125       | 0.235779                    | 0.246646  |
| COVID-19 National Incident Room Surveillance Team | 0.24089625      | 0.2354592                   | 0.2463333 |

|    |                        |            |           |           |
|----|------------------------|------------|-----------|-----------|
| 1  |                        |            |           |           |
| 2  |                        |            |           |           |
| 3  | Dai Y                  | 0.24140795 | 0.235977  | 0.246839  |
| 4  | Daniela Loconsole      | 0.24092582 | 0.235491  | 0.24636   |
| 5  | Ding Y                 | 0.24150026 | 0.236068  | 0.246932  |
| 6  | Dong X                 | 0.24143203 | 0.236001  | 0.246863  |
| 7  | Dong XC                | 0.2416393  | 0.236206  | 0.247073  |
| 8  | Dong YY                | 0.24137929 | 0.235948  | 0.246811  |
| 9  | Erinoso Olufemi A.     | 0.23952371 | 0.23408   | 0.244968  |
| 10 | Eythorsson Elias       | 0.24370873 | 0.238245  | 0.249173  |
| 11 | Fakiri EL K            | 0.24113926 | 0.235707  | 0.246572  |
| 12 | Fan YZ                 | 0.24148887 | 0.236056  | 0.246921  |
| 13 | Feaster Matt           | 0.24184601 | 0.236402  | 0.24729   |
| 14 | Feng XP                | 0.24145405 | 0.236022  | 0.246886  |
| 15 | Foster Catherine E.    | 0.24219659 | 0.2367402 | 0.247653  |
| 16 | Friederike Maechler    | 0.24145871 | 0.236026  | 0.246892  |
| 17 | Gao HJ                 | 0.24146272 | 0.236031  | 0.246894  |
| 18 | Gao T                  | 0.24143969 | 0.236008  | 0.246871  |
| 19 | Gautret P              | 0.24153928 | 0.236106  | 0.246973  |
| 20 | Gill Livingston        | 0.23967291 | 0.2342354 | 0.2451104 |
| 21 | Grados Isabel Zumalave | 0.24133743 | 0.235903  | 0.246772  |
| 22 | Graham N.S.N.          | 0.2413419  | 0.235908  | 0.246776  |
| 23 | Grechukhina Olga       | 0.24149908 | 0.236064  | 0.246934  |
| 24 | Gu. Kim                | 0.24189922 | 0.236461  | 0.247337  |
| 25 | Guo CX                 | 0.24148878 | 0.236056  | 0.246922  |
| 26 | Han RD                 | 0.24145339 | 0.236022  | 0.246885  |
| 27 | He M                   | 0.24144486 | 0.236012  | 0.246878  |
| 28 | He WB                  | 0.24279851 | 0.237349  | 0.248248  |
| 29 | Hu SX                  | 0.24153839 | 0.236106  | 0.246971  |
| 30 | Huang DD               | 0.24127801 | 0.235846  | 0.24671   |
| 31 | IH Huerta Saenz        | 0.24148321 | 0.236051  | 0.246915  |
| 32 | Ipekci A               | 0.24095382 | 0.235521  | 0.246387  |
| 33 | Irene Petersen         | 0.24137411 | 0.235943  | 0.246805  |
| 34 | Jennifer S. Singer     | 0.24134545 | 0.23591   | 0.246781  |
| 35 | Jeong SJ               | 0.24137802 | 0.235947  | 0.246809  |
| 36 | Jha S                  | 0.24147981 | 0.236048  | 0.246912  |
| 37 | Ji GH                  | 0.39626896 | 0.389306  | 0.403232  |
| 38 | Ji T                   | 0.24152319 | 0.236091  | 0.246955  |
| 39 | Jia CY                 | 0.24161656 | 0.236181  | 0.247052  |
| 40 | Jiang CH               | 0.23967837 | 0.234267  | 0.24509   |
| 41 | Jiang R                | 0.24145818 | 0.236027  | 0.24689   |
| 42 | Jibrin YB              | 0.24119677 | 0.235764  | 0.246629  |
| 43 | Jin MH                 | 0.24143013 | 0.235999  | 0.246861  |
| 44 | Jung CY                | 0.20909713 | 0.203439  | 0.214755  |
| 45 | Kang M                 | 0.24147271 | 0.236041  | 0.246904  |
| 46 |                        |            |           |           |
| 47 |                        |            |           |           |
| 48 |                        |            |           |           |
| 49 |                        |            |           |           |
| 50 |                        |            |           |           |
| 51 |                        |            |           |           |
| 52 |                        |            |           |           |
| 53 |                        |            |           |           |
| 54 |                        |            |           |           |
| 55 |                        |            |           |           |
| 56 |                        |            |           |           |
| 57 |                        |            |           |           |
| 58 |                        |            |           |           |
| 59 |                        |            |           |           |
| 60 |                        |            |           |           |

1  
2  
3  
4  
5  
6  
7  
8  
9  
10  
11  
12  
13  
14  
15  
16  
17  
18  
19  
20  
21  
22  
23  
24  
25  
26  
27  
28  
29  
30  
31  
32  
33  
34  
35  
36  
37  
38  
39  
40  
41  
42  
43  
44  
45  
46  
47  
48  
49  
50  
51  
52  
53  
54  
55  
56  
57  
58  
59  
60

|                   |            |          |          |
|-------------------|------------|----------|----------|
| Kasper MR         | 0.23947349 | 0.234015 | 0.244932 |
| Ke B              | 0.24140336 | 0.235972 | 0.246835 |
| Kenu E            | 0.15292338 | 0.147079 | 0.158767 |
| Ki M              | 0.24144812 | 0.236017 | 0.24688  |
| Kirenga Bruce     | 0.24127552 | 0.235843 | 0.246708 |
| Kong WF           | 0.24159901 | 0.236157 | 0.247041 |
| Krajcar N         | 0.24111447 | 0.235679 | 0.24655  |
| Kristin J. Meyers | 0.2409627  | 0.23553  | 0.246395 |
| Kumar R           | 0.24101612 | 0.23558  | 0.246452 |
| Ladhani Shamez N  | 0.24109717 | 0.235664 | 0.24653  |
| Lai XQ            | 0.24160057 | 0.236167 | 0.247034 |
| Le TQM            | 0.24143392 | 0.236003 | 0.246865 |
| Lee YH            | 0.23829599 | 0.232852 | 0.24374  |
| Lei MY            | 0.24149777 | 0.236064 | 0.246932 |
| Lewis Megan       | 0.24142997 | 0.235998 | 0.246862 |
| Li CY             | 0.24142441 | 0.235993 | 0.246855 |
| Li J              | 0.2413753  | 0.235944 | 0.246807 |
| Li W              | 0.24139515 | 0.235964 | 0.246826 |
| Li Y              | 0.24150647 | 0.236075 | 0.246938 |
| Li Y              | 0.24149327 | 0.23606  | 0.246927 |
| Li YL             | 0.24131729 | 0.235881 | 0.246753 |
| Liao XN           | 0.24145868 | 0.236027 | 0.24689  |
| Lin S             | 0.2416722  | 0.236238 | 0.247106 |
| Lin XM            | 0.24143092 | 0.236    | 0.246862 |
| Lin ZF            | 0.24168462 | 0.236249 | 0.24712  |
| Liu B             | 0.24142013 | 0.235989 | 0.246851 |
| Liu BM            | 0.24126719 | 0.235835 | 0.2467   |
| Liu BY            | 0.24125627 | 0.235823 | 0.246689 |
| Liu DH            | 0.24143161 | 0.236    | 0.246863 |
| Liu F             | 0.24143013 | 0.235999 | 0.246861 |
| Liu F             | 0.24139389 | 0.235963 | 0.246825 |
| Liu GT            | 0.24147211 | 0.23604  | 0.246904 |
| Liu MQ            | 0.24140359 | 0.235973 | 0.246835 |
| Liu X             | 0.24142049 | 0.23599  | 0.246851 |
| Liu XX            | 0.24142915 | 0.235996 | 0.246862 |
| Liu XX            | 0.24139974 | 0.235969 | 0.246831 |
| Liu YL            | 0.2414358  | 0.236005 | 0.246867 |
| Liu YX            | 0.24143392 | 0.236003 | 0.246865 |
| Liu ZR            | 0.24143161 | 0.236    | 0.246863 |
| Lu RF             | 0.24146377 | 0.236032 | 0.246895 |
| Lu XX             | 0.24152887 | 0.236094 | 0.246963 |
| Lu Y              | 0.24142824 | 0.235997 | 0.246859 |
| Lucy Rivett       | 0.2412927  | 0.235861 | 0.246725 |

1  
2  
3  
4  
5  
6  
7  
8  
9  
10  
11  
12  
13  
14  
15  
16  
17  
18  
19  
20  
21  
22  
23  
24  
25  
26  
27  
28  
29  
30  
31  
32  
33  
34  
35  
36  
37  
38  
39  
40  
41  
42  
43  
44  
45  
46  
47  
48  
49  
50  
51  
52  
53  
54  
55  
56  
57  
58  
59  
60

|                    |            |           |          |
|--------------------|------------|-----------|----------|
| Luo SH             | 0.24151178 | 0.236079  | 0.246944 |
| M.M. Arons         | 0.24129912 | 0.235867  | 0.246731 |
| Ma MM              | 0.24198274 | 0.236544  | 0.247421 |
| Ma Y               | 0.24142143 | 0.23599   | 0.246853 |
| Ma YL              | 0.24116221 | 0.235729  | 0.246596 |
| MacIntyre CR       | 0.2413937  | 0.235963  | 0.246825 |
| Mahesh C. Patel    | 0.24138328 | 0.235952  | 0.246815 |
| Martin C           | 0.24125469 | 0.235823  | 0.246686 |
| Maru Sheela        | 0.24124874 | 0.235817  | 0.246681 |
| McMichael TM       | 0.24167565 | 0.236241  | 0.24711  |
| Mei X              | 0.24203795 | 0.236597  | 0.247479 |
| Michael J. Fassett | 0.2413168  | 0.235886  | 0.246748 |
| Michel Bielecki    | 0.24087179 | 0.235436  | 0.246307 |
| Miyamae Y          | 0.24134462 | 0.235913  | 0.246776 |
| Mohammed A M Ahmed | 0.24144942 | 0.236011  | 0.246888 |
| Moon SS            | 0.24018952 | 0.234744  | 0.245635 |
| Moriarty LF        | 0.24082564 | 0.235355  | 0.246297 |
| Nagler AR          | 0.24151158 | 0.236077  | 0.246946 |
| Niccolò Parri      | 0.24141984 | 0.235989  | 0.246851 |
| Niu YL             | 0.24141984 | 0.2359887 | 0.246851 |
| Oduro-Mensah E     | 0.24083592 | 0.235399  | 0.246273 |
| Ou JM              | 0.24195018 | 0.236513  | 0.247387 |
| Pan XQ             | 0.2414919  | 0.23606   | 0.246924 |
| Pérez-GarcíaF      | 0.24040096 | 0.234952  | 0.24585  |
| Pongpirul W        | 0.24167772 | 0.236243  | 0.247113 |
| Pongpirul WA       | 0.24143203 | 0.236001  | 0.246863 |
| Qiu CF             | 0.24157399 | 0.236141  | 0.247007 |
| Redditt V          | 0.24141118 | 0.23598   | 0.246843 |
| Roman G. Shmakov   | 0.24152265 | 0.23609   | 0.246955 |
| Rubbi I            | 0.24134435 | 0.235913  | 0.246776 |
| Salim Mattar       | 0.24145077 | 0.236018  | 0.246883 |
| Seong Eun Kim      | 0.24128388 | 0.235851  | 0.246716 |
| Shaher M. Samrah   | 0.24142824 | 0.235997  | 0.246859 |
| She X              | 0.24152738 | 0.236094  | 0.246961 |
| Son H              | 0.24138598 | 0.235955  | 0.246817 |
| Song W             | 0.24144328 | 0.236012  | 0.246875 |
| Song YS            | 0.24147455 | 0.236043  | 0.246906 |
| Spiteri G          | 0.24146748 | 0.236036  | 0.246899 |
| Sun DF             | 0.24173021 | 0.236291  | 0.247169 |
| Sun WW             | 0.24142715 | 0.235996  | 0.246858 |
| Sun Z              | 0.24139789 | 0.235967  | 0.246829 |
| Tang A             | 0.23954514 | 0.234099  | 0.244992 |
| Tang Olive         | 0.24158044 | 0.236148  | 0.247013 |

1  
2  
3  
4  
5  
6  
7  
8  
9  
10  
11  
12  
13  
14  
15  
16  
17  
18  
19  
20  
21  
22  
23  
24  
25  
26  
27  
28  
29  
30  
31  
32  
33  
34  
35  
36  
37  
38  
39  
40  
41  
42  
43  
44  
45  
46  
47  
48  
49  
50  
51  
52  
53  
54  
55  
56  
57  
58  
59  
60

|                   |            |          |          |
|-------------------|------------|----------|----------|
| Thiel SL          | 0.24143378 | 0.236002 | 0.246865 |
| Tian SC           | 0.24143378 | 0.236002 | 0.246865 |
| Tian SJ           | 0.24180609 | 0.23637  | 0.247242 |
| Timothy J. Judson | 0.24145781 | 0.236026 | 0.246889 |
| Tolia VM          | 0.2414328  | 0.236001 | 0.246864 |
| Tong H            | 0.24140796 | 0.235977 | 0.246839 |
| Tong ZD           | 0.24377097 | 0.238308 | 0.249234 |
| Treibel TA        | 0.24152794 | 0.236095 | 0.246961 |
| Tsou Tsung-Pei    | 0.24154887 | 0.236116 | 0.246981 |
| Viktoriya London  | 0.24156342 | 0.236131 | 0.246996 |
| Wan R             | 0.24154887 | 0.236116 | 0.246981 |
| Wang AH           | 0.24156342 | 0.236131 | 0.246996 |
| Wang D            | 0.24123849 | 0.235806 | 0.246671 |
| Wang JC           | 0.24150059 | 0.236069 | 0.246933 |
| Wang KS           | 0.24141203 | 0.235981 | 0.246843 |
| Wang L            | 0.24143349 | 0.236002 | 0.246865 |
| Wang LZ           | 0.24141307 | 0.235982 | 0.246845 |
| Wang S            | 0.24100789 | 0.235576 | 0.24644  |
| Wang T            | 0.24150462 | 0.236073 | 0.246937 |
| Wang XB           | 0.24307795 | 0.237626 | 0.24853  |
| Wang XL           | 0.24240948 | 0.236966 | 0.247853 |
| Wang ZQ           | 0.24137998 | 0.235949 | 0.246811 |
| Waya JLL          | 0.23534326 | 0.229884 | 0.240802 |
| Wong HYF          | 0.24146868 | 0.236036 | 0.246901 |
| Wong J            | 0.24125358 | 0.23582  | 0.246687 |
| Wu GY             | 0.24159715 | 0.236164 | 0.24703  |
| Wu HP             | 0.24143876 | 0.236007 | 0.24687  |
| Wu QR             | 0.24150616 | 0.236074 | 0.246938 |
| Wu XQ             | 0.24134462 | 0.235913 | 0.246776 |
| Wu Y              | 0.24145445 | 0.236023 | 0.246886 |
| Wu YL             | 0.24137738 | 0.235946 | 0.246808 |
| Xiang TX          | 0.24148725 | 0.236055 | 0.246919 |
| Xie JW            | 0.24140583 | 0.235975 | 0.246837 |
| Xie YB            | 0.24145308 | 0.236021 | 0.246885 |
| Xu HM             | 0.24143219 | 0.236001 | 0.246864 |
| Xu S              | 0.24144374 | 0.236012 | 0.246875 |
| Xu TM             | 0.2414677  | 0.236036 | 0.2469   |
| Yan XQ            | 0.24163942 | 0.236204 | 0.247075 |
| Yang K            | 0.24142464 | 0.235993 | 0.246857 |
| Yang NB           | 0.24142592 | 0.235995 | 0.246857 |
| Yang RR           | 0.24130918 | 0.235877 | 0.246742 |
| Yang YL           | 0.24142633 | 0.235995 | 0.246857 |
| Yang YX           | 0.24157517 | 0.236142 | 0.247008 |



|    |                         |            |           |           |
|----|-------------------------|------------|-----------|-----------|
| 1  |                         |            |           |           |
| 2  |                         |            |           |           |
| 3  | Yao QD                  | 0.24149534 | 0.236064  | 0.246927  |
| 4  | Yao XY                  | 0.24142441 | 0.235993  | 0.246855  |
| 5  | Yayla Burcu Ceylan Cura | 0.24140419 | 0.2359687 | 0.2468397 |
| 6  | Ye XX                   | 0.24142972 | 0.235999  | 0.246861  |
| 7  | Ye Y                    | 0.2429242  | 0.237467  | 0.248382  |
| 8  | Yu FT                   | 0.24154702 | 0.236115  | 0.24698   |
| 9  | Yu JX                   | 0.24156559 | 0.236133  | 0.246998  |
| 10 | Yu X                    | 0.24159686 | 0.236164  | 0.24703   |
| 11 | Yuan L                  | 0.24135433 | 0.235923  | 0.246786  |
| 12 | Yue HM                  | 0.24146326 | 0.236031  | 0.246896  |
| 13 | Zeng J                  | 0.2418316  | 0.236396  | 0.247267  |
| 14 | Zeng WZ                 | 0.24145465 | 0.236023  | 0.246886  |
| 15 | Zhai HL                 | 0.24143203 | 0.236001  | 0.246863  |
| 16 | Zhan H                  | 0.24142247 | 0.235991  | 0.246853  |
| 17 | Zhan T                  | 0.24208018 | 0.236641  | 0.24752   |
| 18 | Zhang JJ                | 0.24142049 | 0.23599   | 0.246851  |
| 19 | Zhang KY                | 0.24141598 | 0.235985  | 0.246847  |
| 20 | Zhang L                 | 0.24141848 | 0.235987  | 0.24685   |
| 21 | Zhang R                 | 0.24147427 | 0.236042  | 0.246907  |
| 22 | Zhang Y                 | 0.24142572 | 0.235994  | 0.246857  |
| 23 | Zhang YC                | 0.24141929 | 0.235988  | 0.246851  |
| 24 | Zhang YD                | 0.24139778 | 0.235967  | 0.246829  |
| 25 | Zhao L                  | 0.24140501 | 0.235974  | 0.246837  |
| 26 | Zhong ZM                | 0.24142331 | 0.235988  | 0.246858  |
| 27 | Zhou H                  | 0.24142781 | 0.235997  | 0.246859  |
| 28 | Zhou JL                 | 0.24161904 | 0.236185  | 0.247053  |
| 29 | Zhou R                  | 0.2414069  | 0.235975  | 0.246838  |
| 30 | Zhu JF                  | 0.24193569 | 0.236492  | 0.247379  |
| 31 | Zhu MR                  | 0.24145423 | 0.236022  | 0.246887  |
| 32 | Zhu SQ                  | 0.24211027 | 0.236671  | 0.24755   |
| 33 | <b>Combined</b>         | 0.24141874 | 0.235988  | 0.24685   |
| 34 |                         |            |           |           |
| 35 |                         |            |           |           |
| 36 |                         |            |           |           |
| 37 |                         |            |           |           |
| 38 |                         |            |           |           |
| 39 |                         |            |           |           |
| 40 |                         |            |           |           |
| 41 |                         |            |           |           |
| 42 |                         |            |           |           |
| 43 |                         |            |           |           |
| 44 |                         |            |           |           |
| 45 |                         |            |           |           |
| 46 |                         |            |           |           |
| 47 |                         |            |           |           |
| 48 |                         |            |           |           |
| 49 |                         |            |           |           |
| 50 |                         |            |           |           |
| 51 |                         |            |           |           |
| 52 |                         |            |           |           |
| 53 |                         |            |           |           |
| 54 |                         |            |           |           |
| 55 |                         |            |           |           |
| 56 |                         |            |           |           |
| 57 |                         |            |           |           |
| 58 |                         |            |           |           |
| 59 |                         |            |           |           |
| 60 |                         |            |           |           |

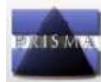

# PRISMA 2009 Checklist

| Section/topic                      | #  | Checklist item                                                                                                                                                                                                                                                                                              | Reported on page # |
|------------------------------------|----|-------------------------------------------------------------------------------------------------------------------------------------------------------------------------------------------------------------------------------------------------------------------------------------------------------------|--------------------|
| <b>TITLE</b>                       |    |                                                                                                                                                                                                                                                                                                             |                    |
| Title                              | 1  | Identify the report as a systematic review, meta-analysis, or both.                                                                                                                                                                                                                                         | 1                  |
| <b>ABSTRACT</b>                    |    |                                                                                                                                                                                                                                                                                                             |                    |
| Structured summary                 | 2  | Provide a structured summary including, as applicable: background; objectives; data sources; study eligibility criteria, participants, and interventions; study appraisal and synthesis methods; results; limitations; conclusions and implications of key findings; systematic review registration number. | 2                  |
| <b>INTRODUCTION</b>                |    |                                                                                                                                                                                                                                                                                                             |                    |
| Rationale                          | 3  | Describe the rationale for the review in the context of what is already known.                                                                                                                                                                                                                              | 5                  |
| Objectives                         | 4  | Provide an explicit statement of questions being addressed with reference to participants, interventions, comparisons, outcomes, and study design (PICOS).                                                                                                                                                  | 5-6                |
| <b>METHODS</b>                     |    |                                                                                                                                                                                                                                                                                                             |                    |
| Protocol and registration          | 5  | Indicate if a review protocol exists, if and where it can be accessed (e.g., Web address), and, if available, provide registration information including registration number.                                                                                                                               | /                  |
| Eligibility criteria               | 6  | Specify study characteristics (e.g., PICOS, length of follow-up) and report characteristics (e.g., years considered, language, publication status) used as criteria for eligibility, giving rationale.                                                                                                      | 7                  |
| Information sources                | 7  | Describe all information sources (e.g., databases with dates of coverage, contact with study authors to identify additional studies) in the search and date last searched.                                                                                                                                  | 6                  |
| Search                             | 8  | Present full electronic search strategy for at least one database, including any limits used, such that it could be repeated.                                                                                                                                                                               | 6                  |
| Study selection                    | 9  | State the process for selecting studies (i.e., screening, eligibility, included in systematic review, and, if applicable, included in the meta-analysis).                                                                                                                                                   | 7                  |
| Data collection process            | 10 | Describe method of data extraction from reports (e.g., piloted forms, independently, in duplicate) and any processes for obtaining and confirming data from investigators.                                                                                                                                  | 7-8                |
| Data items                         | 11 | List and define all variables for which data were sought (e.g., PICOS, funding sources) and any assumptions and simplifications made.                                                                                                                                                                       | 7-8                |
| Risk of bias in individual studies | 12 | Describe methods used for assessing risk of bias of individual studies (including specification of whether this was done at the study or outcome level), and how this information is to be used in any data synthesis.                                                                                      | 9                  |
| Summary measures                   | 13 | State the principal summary measures (e.g., risk ratio, difference in means).                                                                                                                                                                                                                               | 9                  |
| Synthesis of results               | 14 | Describe the methods of handling data and combining results of studies, if done, including measures of consistency (e.g., I <sup>2</sup> ) for each meta-analysis.                                                                                                                                          | 9                  |



# PRISMA 2009 Checklist

Page 1 of 2

| Section/topic                 | #  | Checklist item                                                                                                                                                                                           | Reported on page # |
|-------------------------------|----|----------------------------------------------------------------------------------------------------------------------------------------------------------------------------------------------------------|--------------------|
| Risk of bias across studies   | 15 | Specify any assessment of risk of bias that may affect the cumulative evidence (e.g., publication bias, selective reporting within studies).                                                             | 9                  |
| Additional analyses           | 16 | Describe methods of additional analyses (e.g., sensitivity or subgroup analyses, meta-regression), if done, indicating which were pre-specified.                                                         | 9                  |
| <b>RESULTS</b>                |    |                                                                                                                                                                                                          |                    |
| Study selection               | 17 | Give numbers of studies screened, assessed for eligibility, and included in the review, with reasons for exclusions at each stage, ideally with a flow diagram.                                          | 9-10               |
| Study characteristics         | 18 | For each study, present characteristics for which data were extracted (e.g., study size, PICOS, follow-up period) and provide the citations.                                                             | 10                 |
| Risk of bias within studies   | 19 | Present data on risk of bias of each study and, if available, any outcome level assessment (see item 12).                                                                                                | 12                 |
| Results of individual studies | 20 | For all outcomes considered (benefits or harms), present, for each study: (a) simple summary data for each intervention group (b) effect estimates and confidence intervals, ideally with a forest plot. | 10-11              |
| Synthesis of results          | 21 | Present results of each meta-analysis done, including confidence intervals and measures of consistency.                                                                                                  | 10-12              |
| Risk of bias across studies   | 22 | Present results of any assessment of risk of bias across studies (see Item 15).                                                                                                                          | 12                 |
| Additional analysis           | 23 | Give results of additional analyses, if done (e.g., sensitivity or subgroup analyses, meta-regression [see Item 16]).                                                                                    | 11-12              |
| <b>DISCUSSION</b>             |    |                                                                                                                                                                                                          |                    |
| Summary of evidence           | 24 | Summarize the main findings including the strength of evidence for each main outcome; consider their relevance to key groups (e.g., healthcare providers, users, and policy makers).                     | 12                 |
| Limitations                   | 25 | Discuss limitations at study and outcome level (e.g., risk of bias), and at review-level (e.g., incomplete retrieval of identified research, reporting bias).                                            | 15-16              |
| Conclusions                   | 26 | Provide a general interpretation of the results in the context of other evidence, and implications for future research.                                                                                  | 16                 |
| <b>FUNDING</b>                |    |                                                                                                                                                                                                          |                    |
| Funding                       | 27 | Describe sources of funding for the systematic review and other support (e.g., supply of data); role of funders for the systematic review.                                                               | 17                 |

From: Moher D, Liberati A, Tetzlaff J, Altman DG, The PRISMA Group (2009). Preferred Reporting Items for Systematic Reviews and Meta-Analyses: The PRISMA Statement. PLoS Med 6(7): e1000097. doi:10.1371/journal.pmed1000097

For more information, visit: [www.prisma-statement.org](http://www.prisma-statement.org).

Page 2 of 2

For peer review only - <http://bmjopen.bmj.com/site/about/guidelines.xhtml>
